# Supplementary material for: An Yb(OTf)3 and visible light relay catalyzed [3 + 2] cycloaddition/[3,3]-rearrangement/[4 + 2] cycloaddition in one pot to prepare oxazonine-fused endoperoxides
Source: Royal Society of Chemistry journal article supplement (doi:10.1039/d0gc00929f), 2020-01-01
Supplement: d0gc00929f1.pdf [file d0gc00929f1.pdf]

*Supporting Information*

**Yb(OTf)<sub>3</sub> and Visible Light Relay Catalyzed [3+2] Cycloaddition  
/[3,3]-Rearrangement/[4+2] Cycloaddition in One Pot to Prepare  
Oxazone-Fused Endoperoxides**

Xiao-Pan Ma<sup>†</sup>, Cai-Mei Nong<sup>†</sup>, Yu-Feng Liang, Pei-Pei Xu, Xiu-Yun Guo, Cui Liang,  
Cheng-Xue Pan, Gui-Fa Su,\* and Dong-Liang Mo\*

*State Key Laboratory for Chemistry and Molecular Engineering of Medicinal  
Resources, Ministry of Science and Technology of China; School of Chemistry and  
Pharmaceutical Sciences, Guangxi Normal University, 15 Yu Cai Road, Guilin  
541004, China. E-mail: GFS: [gfysglgx@163.com](mailto:gfysglgx@163.com); DLM:  
[moeastlight@mailbox.gxnu.edu.cn](mailto:moeastlight@mailbox.gxnu.edu.cn)*

**Contents**

|     |                                                                               |     |
|-----|-------------------------------------------------------------------------------|-----|
| 1.  | General experimental information                                              | S2  |
| 2.  | General procedure for the synthesis of endoperoxides <b>3</b>                 | S2  |
| 3.  | Synthesis of compound <i>trans</i> - <b>3aa</b>                               | S17 |
| 4.  | Trapping experiment of <i>cis</i> - <b>4aa</b> to <i>cis</i> - <b>3aa</b>     | S18 |
| 5.  | Synthesis of compounds <b>6</b>                                               | S18 |
| 6.  | Synthesis of compounds <b>7</b>                                               | S23 |
| 7.  | Gram scale preparation of <b>3aa</b>                                          | S28 |
| 8.  | Synthesis of compounds <b>8-10</b> from <b>3aa</b>                            | S29 |
| 9.  | Asymmetric synthesis of endoperoxide <b>9</b> by chiral auxiliary             | S31 |
| 10. | Asymmetric synthesis of <b>3aa</b> by PyBox                                   | S33 |
| 11. | Biological activity studies of endoperoxides <b>3, 4, 6</b>                   | S33 |
| 12. | References                                                                    | S35 |
| 13. | X-ray structure for compounds <b>3aa</b>                                      | S36 |
| 14. | NMR spectra for compounds <b>3, 5-10</b> and HPLC for <b>9</b> and <b>3aa</b> | S37 |

## 1. General experimental information

$^1\text{H}$  NMR and  $^{13}\text{C}$  NMR spectra were recorded at ambient temperature using 400 MHz or 600 MHz spectrometers. The data are reported as follows: chemical shift in ppm from internal tetramethylsilane on the  $\delta$  scale, multiplicity (br = broad, s = singlet, d = doublet, t = triplet, q = quartet, m = multiplet), coupling constants (Hz), and integration. High resolution mass spectra were acquired on an LTQ FT spectrometer, and were obtained by peak matching. Melting points are reported uncorrected. Analytical thin layer chromatography was performed on 0.25 mm extra hard silica gel plates with UV254 fluorescent indicator. Chromatography was performed using with 300-400 mesh silica gel ( $\text{SiO}_2$ ). Unless otherwise noted, all reactions were performed under air atmosphere. All reagents and solvents were obtained from commercial sources and, where appropriate, purified prior to use. The *N*-vinyl nitrones **1a-1o**<sup>[1]</sup> methylenecyclopropanes **2a-2l**<sup>[2]</sup>, nine-membered heterocycles *cis*-**4aa**<sup>[3]</sup> and *trans*-**4aa**<sup>[3]</sup> and were prepared according the literature methods and their spectral data matched literature values.

## 2. General procedure for the synthesis of endoperoxides **3**

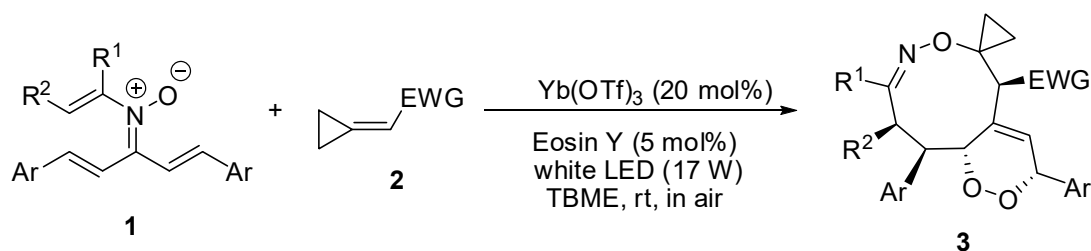

**General procedure A:** An oven-dried glass vial equipped with a magnetic stirrer was charged with the corresponding *N*-vinyl nitron **1** (0.2 mmol),  $\text{Yb}(\text{OTf})_3$  (20 mol%, 0.04 mmol, 0.025 g), Eosin Y (5 mol%, 0.01 mmol, 0.006 g) and TBME (2 mL). Methylenecyclopropane **2** (0.4 mmol, 2.0 equiv.) was added to the mixture. The vial was closed with a plastic film. Then, the reaction mixture was stirred and irradiated (17 W white LED) at room temperature for 36–72 h (monitored by TLC). At this time, the solvent was removed under reduced pressure and the crude product was purified

by flash column chromatography (the crude residue was dry loaded with silica gel, 1/20 to 1/10, ethyl acetate/petroleum ether) to afford endoperoxide **3**.

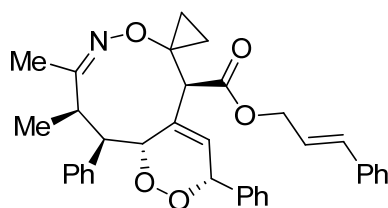

**3aa**

**Oxazonine-fused endoperoxide 3aa**, a light yellow solid, 0.090 g, 82% yield. Mp: 166–167 °C;  $^1\text{H}$  NMR (400 MHz,  $\text{CDCl}_3$ ):  $\delta$  7.29 (d,  $J = 7.2$  Hz, 2H), 7.19–7.09 (m, 11H), 6.93 (d,  $J = 6.8$  Hz, 2H), 6.56 (d,  $J = 15.6$  Hz, 1H), 6.12 (dt,  $J = 15.6$  Hz, 6.8 Hz, 1H), 5.80–5.76 (m, 1H), 5.62–5.58 (m, 1H), 5.46–5.42 (m, 1H), 4.70–4.58 (m, 2H), 3.95 (s, 1H), 3.29–3.28 (m, 1H), 2.69–2.64 (m, 1H), 1.87 (s, 3H), 1.44 (d,  $J = 7.2$  Hz, 3H), 1.19–1.18 (m, 1H), 1.12–1.07 (m, 1H), 1.01–0.96 (m, 1H), 0.80–0.73 (m, 1H);  $^{13}\text{C}$  NMR (100 MHz,  $\text{CDCl}_3$ ):  $\delta$  172.4, 169.4, 142.8, 136.4, 135.8, 135.4, 135.3, 129.3, 128.5, 128.4, 128.2, 128.1, 127.9, 127.8, 126.6, 126.4, 124.9, 122.2, 79.8, 77.5, 65.4, 62.8, 50.8, 49.4, 46.0, 21.7, 12.4, 11.2, 9.3; IR (thin film) 3022, 2964, 1737, 1641, 1450, 1148, 1001, 695  $\text{cm}^{-1}$ ; HRMS (ESI)  $m/z$  calcd for  $\text{C}_{35}\text{H}_{36}\text{NO}_5$   $[\text{M} + \text{H}]^+$ : 550.2588, found: 550.2608.

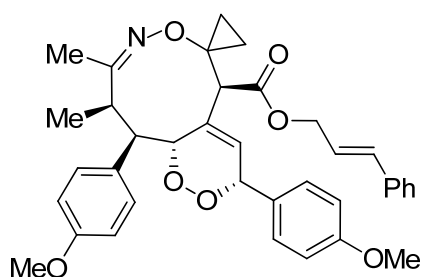

**3ba**

**Oxazonine-fused endoperoxide 3ba**, a light yellow solid, 0.096 g, 79% yield. Mp: 150–151 °C;  $^1\text{H}$  NMR (400 MHz,  $\text{CDCl}_3$ ):  $\delta$  7.27–7.25 (m, 7H), 6.98 (d,  $J = 8.4$  Hz, 2H), 6.80 (d,  $J = 8.0$  Hz, 2H), 6.72 (d,  $J = 8.4$  Hz, 2H), 6.64 (d,  $J = 16.0$  Hz, 1H), 6.21–6.14 (m, 1H), 5.80–5.76 (m, 1H), 5.70–5.62 (m, 1H), 5.50–5.41 (m, 1H), 4.80–4.64 (m, 2H), 4.01 (s, 1H), 3.72 (s, 6H), 3.34–3.29 (m, 1H), 2.77–2.72 (m, 1H),

1.94 (s, 3H), 1.47 (d,  $J = 7.2$  Hz, 3H), 1.29–1.25 (m, 1H), 1.18–1.13 (m, 1H), 1.08–1.04 (m, 1H), 0.87–0.81 (m, 1H);  $^{13}\text{C}$  NMR (100 MHz,  $\text{CDCl}_3$ ):  $\delta$  172.6, 169.5, 159.8, 158.0, 135.8, 135.6, 135.3, 135.0, 130.2, 129.6, 128.5, 128.3, 128.1, 126.5, 125.1, 122.2, 113.6, 113.2, 79.4, 77.6, 65.4, 62.8, 55.1, 55.0, 50.1, 49.4, 46.0, 21.7, 12.4, 11.3, 9.4; IR (thin film) 3003, 2938, 1739, 1610, 1512, 1147, 1028, 694  $\text{cm}^{-1}$ ; HRMS (ESI)  $m/z$  calcd for  $\text{C}_{37}\text{H}_{40}\text{NO}_7$   $[\text{M} + \text{H}]^+$ : 610.2799, found: 610.2794.

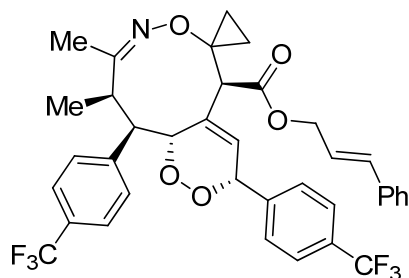

**3ca**

**Oxazonine-fused endoperoxide 3ca**, a light yellow solid, 0.110 g, 80% yield. Mp: 163–164 °C;  $^1\text{H}$  NMR (400 MHz,  $\text{CDCl}_3$ ):  $\delta$  7.52 (d,  $J = 8.0$  Hz, 2H), 7.44 (d,  $J = 7.6$  Hz, 2H), 7.39 (d,  $J = 8.0$  Hz, 2H), 7.31–7.25 (m, 5H), 7.02 (d,  $J = 8.0$  Hz, 2H), 6.66 (d,  $J = 16.0$  Hz, 1H), 6.23–6.16 (m, 1H), 5.90–5.85 (m, 1H), 5.71–5.67 (m, 1H), 5.58–5.50 (m, 1H), 4.81–4.66 (m, 2H), 4.02 (s, 1H), 3.39–3.38 (m, 1H), 2.65–2.60 (m, 1H), 1.97 (s, 3H), 1.52 (d,  $J = 7.2$  Hz, 3H), 1.31–1.17 (m, 2H), 1.10–1.04 (m, 1H), 0.87–0.82 (m, 1H);  $^{13}\text{C}$  NMR (100 MHz,  $\text{CDCl}_3$ ):  $\delta$  171.7, 169.2, 146.7, 140.3, 136.1, 135.8, 135.7, 131.2 (q,  $J = 32.0$  Hz), 129.5, 129.0, 128.7, 128.5, 127.7, 126.6, 125.5 (d,  $J = 36.4$  Hz), 125.3 (q,  $J = 3.6$  Hz), 124.9 (q,  $J = 3.6$  Hz), 124.0, 122.8, 122.0, 78.9, 77.3, 65.6, 62.9, 50.4, 49.3, 46.0, 21.8, 12.1, 11.2, 9.3;  $^{19}\text{F}$  NMR (100 MHz,  $\text{CDCl}_3$ ):  $\delta$  -62.4, -62.6; IR (thin film) 3023, 2966, 1732, 1617, 1325, 1122, 692  $\text{cm}^{-1}$ ; HRMS (ESI)  $m/z$  calcd for  $\text{C}_{37}\text{H}_{34}\text{F}_6\text{NO}_5$   $[\text{M} + \text{H}]^+$ : 686.2336, found: 686.2331.

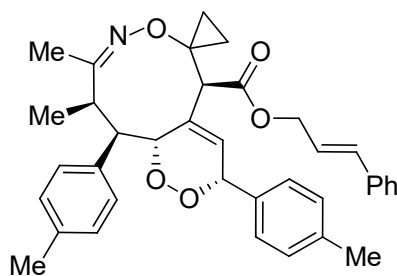

**3da**

**Oxazonine-fused endoperoxide 3da**, a light yellow solid, 0.090 g, 78% yield. Mp: 162–163 °C; <sup>1</sup>H NMR (400 MHz, CDCl<sub>3</sub>): δ 7.19–7.16 (m, 7H), 6.99 (d, *J* = 7.6 Hz, 2H), 6.92 (d, *J* = 8.0 Hz, 2H), 6.85 (d, *J* = 7.6 Hz, 2H), 6.56 (d, *J* = 16.0 Hz, 1H), 6.12–6.05 (m, 1H), 5.74–5.70 (m, 1H), 5.59–5.55 (m, 1H), 5.40–5.35 (m, 1H), 4.70–4.56 (m, 2H), 3.95 (s, 1H), 3.27–3.26 (m, 1H), 2.67–2.62 (m, 1H), 2.18 (s, 6H), 3.14 (s, 3H), 1.41 (d, *J* = 7.2 Hz, 3H), 1.21–1.14 (m, 1H), 1.12–1.05 (m, 1H), 1.00–0.94 (m, 1H), 0.78–0.73 (m, 1H); <sup>13</sup>C NMR (100 MHz, CDCl<sub>3</sub>): δ 172.5, 169.4, 139.8, 138.4, 135.9, 135.8, 135.4, 135.3, 133.3, 129.2, 128.9, 128.6, 128.5, 128.1, 128.0, 126.5, 125.1, 122.2, 79.6, 77.5, 65.4, 62.7, 50.5, 49.3, 46.1, 21.7, 21.1, 20.9, 12.4, 11.3, 9.3; IR (thin film) 3006, 2918, 1735, 1514, 1156, 1023, 725 cm<sup>-1</sup>; HRMS (ESI) *m/z* calcd for C<sub>37</sub>H<sub>40</sub>NO<sub>5</sub> [M + H]<sup>+</sup>: 578.2901, found: 578.2900.

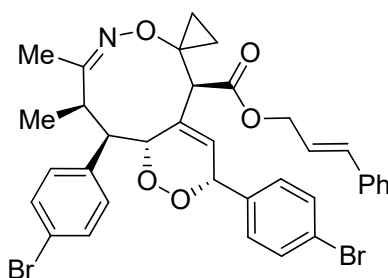

**3ea**

**Oxazonine-fused endoperoxide 3ea**, a light yellow solid, 0.093 g, 66% yield. Mp: 136–137 °C; <sup>1</sup>H NMR (400 MHz, CDCl<sub>3</sub>): δ 7.38 (d, *J* = 8.4 Hz, 2H), 7.33–7.24 (m, 7H), 7.21 (d, *J* = 8.0 Hz, 2H), 6.85 (d, *J* = 8.0 Hz, 2H), 6.64 (d, *J* = 15.6 Hz, 1H), 6.20–6.14 (m, 1H), 5.84–5.73 (m, 1H), 5.65–5.58 (m, 1H), 5.50–5.40 (m, 1H), 4.81–4.63 (m, 2H), 4.00 (s, 1H), 3.28–3.27 (m, 1H), 2.62–2.60 (m, 1H), 1.96 (s, 3H), 1.48 (d, *J* = 7.2 Hz, 3H), 1.27–1.23 (m, 1H), 1.19–1.13 (m, 1H), 1.07–1.03 (m, 1H), 0.86–0.81 (m, 1H); <sup>13</sup>C NMR (100 MHz, CDCl<sub>3</sub>): δ 171.9, 169.2, 141.8, 135.9, 135.8, 135.7, 131.6, 131.5, 131.0, 130.9, 129.5, 128.6, 128.4, 126.5, 124.3, 122.8, 122.0, 120.5, 79.0, 77.2, 65.5, 62.7, 50.1, 49.1, 46.2, 21.8, 12.0, 11.2, 9.3; IR (thin film) 3024, 2948, 1736, 1488, 1155, 1009, 789 cm<sup>-1</sup>; HRMS (ESI) *m/z* calcd for C<sub>35</sub>H<sub>34</sub>Br<sub>2</sub>NO<sub>5</sub> [M + H]<sup>+</sup>: 706.0798, found: 706.0796.

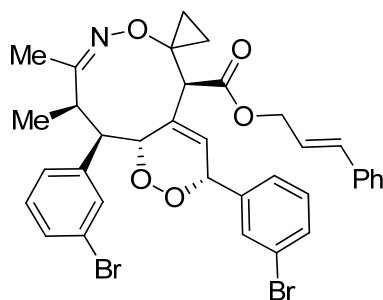

**3fa**

**Oxazonine-fused endoperoxide 3fa**, a light yellow solid, 0.106 g, 75% yield. Mp: 75–76 °C;  $^1\text{H}$  NMR (400 MHz,  $\text{CDCl}_3$ ):  $\delta$  7.40 (s, 1H), 7.27–7.18 (m, 8H), 7.12 (t,  $J = 7.6$  Hz, 1H), 7.03 (s, 1H), 6.99 (t,  $J = 7.6$  Hz, 1H), 6.85 (d,  $J = 7.6$  Hz, 1H), 6.58 (d,  $J = 16.0$  Hz, 1H), 6.15–6.07 (m, 1H), 5.80–5.71 (m, 1H), 5.58–5.53 (m, 1H), 5.37–5.32 (m, 1H), 4.73–4.59 (m, 2H), 3.93 (s, 1H), 3.20–3.18 (m, 1H), 2.61–2.56 (m, 1H), 1.90 (s, 3H), 1.46 (d,  $J = 7.2$  Hz, 3H), 1.18–1.10 (m, 2H), 0.99–0.98 (m, 1H), 0.80–0.75 (m, 1H);  $^{13}\text{C}$  NMR (100 MHz,  $\text{CDCl}_3$ ):  $\delta$  171.9, 169.2, 144.9, 138.5, 135.7, 135.6, 132.2, 131.7, 130.6, 130.0, 129.6, 129.5, 128.6, 128.2, 127.7, 126.5, 126.4, 126.3, 124.1, 122.3, 122.0, 121.9, 78.9, 77.1, 65.6, 62.8, 50.0, 49.1, 46.2, 21.8, 12.2, 11.1, 9.2; IR (thin film) 3021, 2963, 1734, 1594, 1261, 1023, 803  $\text{cm}^{-1}$ ; HRMS (ESI)  $m/z$  calcd for  $\text{C}_{35}\text{H}_{34}\text{Br}_2\text{NO}_5$   $[\text{M} + \text{H}]^+$ : 706.0798, found: 706.0799.

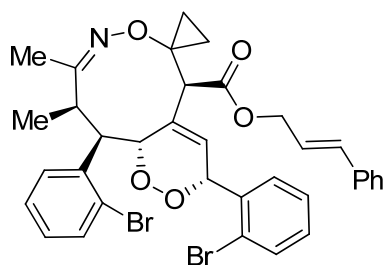

**3ga**

**Oxazonine-fused endoperoxide 3ga**, a light yellow solid, 0.073 g, 52% yield. Mp: 181–182 °C;  $^1\text{H}$  NMR (400 MHz,  $\text{CDCl}_3$ ):  $\delta$  7.52 (d,  $J = 7.6$  Hz, 1H), 7.46 (d,  $J = 8.0$  Hz, 1H), 7.30 (d,  $J = 7.2$  Hz, 1H), 7.20–7.18 (m, 6H), 7.01–6.91 (m, 4H), 6.55 (d,  $J = 16.0$  Hz, 1H), 6.11–6.04 (m, 1H), 5.90–5.85 (m, 1H), 5.83–5.76 (m, 1H), 5.64–5.57 (m, 1H), 4.72–4.57 (m, 2H), 4.15–4.09 (m, 2H), 2.44–2.39 (m, 1H), 1.96 (s, 3H), 1.46 (d,  $J = 7.2$  Hz, 3H), 1.26–1.11 (m, 2H), 0.98–0.94 (m, 1H), 0.82–0.78 (m, 1H);  $^{13}\text{C}$

NMR (100 MHz, CDCl<sub>3</sub>):  $\delta$  171.8, 169.2, 142.2, 135.9, 135.6, 134.9, 132.5, 132.1, 131.0, 129.7, 129.4, 128.5, 128.4, 128.0, 127.9, 127.1, 127.0, 126.5, 126.4, 124.7, 123.4, 122.2, 78.3, 76.8, 65.2, 62.9, 49.0, 46.5, 46.3, 21.8, 11.7, 11.1, 9.4; IR (thin film) 3024, 2945, 1730, 1466, 1162, 1025, 747 cm<sup>-1</sup>; HRMS (ESI)  $m/z$  calcd for C<sub>35</sub>H<sub>34</sub>Br<sub>2</sub>NO<sub>5</sub> [M + H]<sup>+</sup>: 706.0798, found: 706.0797.

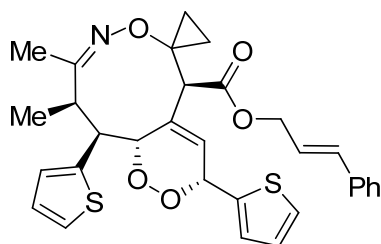

**3ha**

**Oxazonine-fused endoperoxide 3ha**, a light yellow solid, 0.064 g, 57% yield. Mp: 151–152 °C; <sup>1</sup>H NMR (400 MHz, CDCl<sub>3</sub>):  $\delta$  7.21–7.17 (m, 5H), 7.10–7.04 (m, 2H), 6.90–6.75 (m, 4H), 6.59 (d,  $J$  = 16.0 Hz, 1H), 6.17–6.10 (m, 1H), 5.72–5.70 (m, 3H), 4.76–4.58 (m, 2H), 3.92 (s, 1H), 3.70–3.69 (m, 1H), 2.73–2.68 (m, 1H), 1.89 (s, 3H), 1.42 (d,  $J$  = 7.2 Hz, 3H), 1.21–1.16 (m, 1H), 1.12–1.06 (m, 1H), 0.98–0.93 (m, 1H), 0.80–0.74 (m, 1H); <sup>13</sup>C NMR (100 MHz, CDCl<sub>3</sub>):  $\delta$  171.7, 169.1, 143.8, 138.3, 135.8, 135.5, 135.4, 128.5, 128.1, 127.9, 126.7, 126.6, 126.4, 126.0, 125.9, 124.5, 123.7, 122.2, 77.6, 74.6, 65.5, 62.7, 48.9, 46.4, 46.0, 21.8, 12.3, 11.3, 9.4; IR (thin film) 3010, 2962, 1738, 1640, 1445, 1147, 1027, 692 cm<sup>-1</sup>; HRMS (ESI)  $m/z$  calcd for C<sub>31</sub>H<sub>32</sub>S<sub>2</sub>NO<sub>5</sub> [M + H]<sup>+</sup>: 562.1716, found: 562.1716.

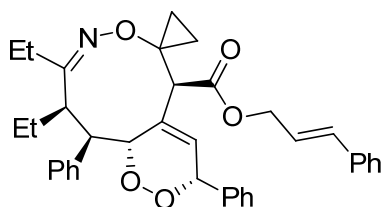

**3ia**

**Oxazonine-fused endoperoxide 3ia**, a light yellow solid, 0.076 g, 66% yield. Mp: 121–122 °C; <sup>1</sup>H NMR (400 MHz, CDCl<sub>3</sub>):  $\delta$  7.30–7.25 (m, 2H), 7.21–7.15 (m, 7H), 7.11–7.04 (m, 4H), 6.88 (d,  $J$  = 7.2 Hz, 2H), 6.55 (d,  $J$  = 16.0 Hz, 1H), 6.11 (dt,  $J$  =

15.6 Hz, 6.8 Hz, 1H), 5.80–5.76 (m, 1H), 5.60–5.53 (m, 1H), 5.40–5.35 (m, 1H), 4.70–4.56 (m, 2H), 4.01 (s, 1H), 3.15–3.14 (m, 1H), 2.41–2.28 (m, 3H), 2.14–1.99 (m, 2H), 1.22–1.16 (m, 2H), 1.10 (t,  $J = 7.2$  Hz, 3H), 0.97–0.91 (m, 1H), 0.87 (t,  $J = 7.2$  Hz, 3H), 0.80–0.73 (m, 1H);  $^{13}\text{C}$  NMR (100 MHz,  $\text{CDCl}_3$ ):  $\delta$  175.1, 169.3, 142.9, 136.5, 135.8, 135.4, 135.3, 129.3, 128.5, 128.4, 128.2, 128.1, 127.9, 127.8, 126.5, 126.4, 124.3, 122.2, 79.6, 77.5, 65.4, 62.6, 53.4, 51.2, 48.6, 30.8, 20.8, 13.2, 11.2, 11.1, 9.3; IR (thin film) 3028, 2970, 1737, 1599, 1453, 1154, 1023, 698  $\text{cm}^{-1}$ ; HRMS (ESI)  $m/z$  calcd for  $\text{C}_{37}\text{H}_{40}\text{NO}_5$  [ $\text{M} + \text{H}$ ] $^+$ : 578.2901, found: 578.2901.

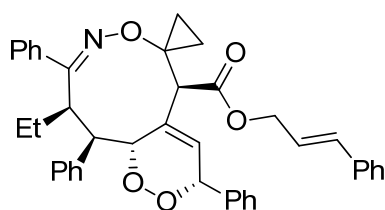

**3ja**

**Oxazonine-fused endoperoxide 3ja**, a light yellow solid, 0.084 g, 67% yield. Mp: 169–170  $^{\circ}\text{C}$ ;  $^1\text{H}$  NMR (400 MHz,  $\text{CDCl}_3$ ):  $\delta$  7.44 (d,  $J = 7.2$  Hz, 2H), 7.35–7.34 (m, 2H), 7.26–7.01 (m, 14H), 6.86 (d,  $J = 6.8$  Hz, 2H), 6.50 (d,  $J = 16.0$  Hz, 1H), 6.04–5.97 (m, 1H), 5.90–5.86 (m, 1H), 5.58–5.54 (m, 1H), 5.39–5.35 (m, 1H), 4.65–4.50 (m, 2H), 4.09 (s, 1H), 3.42–3.41 (m, 1H), 3.09–3.06 (m, 1H), 2.48–2.40 (m, 1H), 2.14–2.09 (m, 1H), 1.28–1.17 (m, 2H), 1.04–1.01 (m, 1H), 0.82–0.81 (m, 1H), 0.78 (t,  $J = 7.2$  Hz, 3H);  $^{13}\text{C}$  NMR (100 MHz,  $\text{CDCl}_3$ ):  $\delta$  172.0, 169.2, 143.0, 136.7, 136.4, 135.7, 135.3, 129.8, 129.3, 128.6, 128.5, 128.4, 128.2, 128.1, 128.0, 127.8, 126.9, 126.5, 126.4, 126.3, 124.5, 122.0, 79.5, 77.6, 65.3, 63.4, 53.6, 51.6, 49.1, 21.3, 13.4, 11.1, 9.3; IR (thin film) 3027, 2951, 1735, 1493, 1155, 966, 694  $\text{cm}^{-1}$ ; HRMS (ESI)  $m/z$  calcd for  $\text{C}_{41}\text{H}_{40}\text{NO}_5$  [ $\text{M} + \text{H}$ ] $^+$ : 626.2901, found: 626.2899.

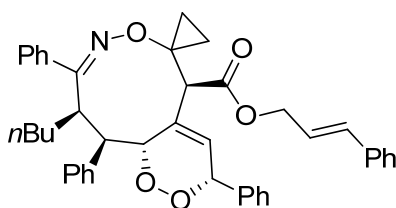

**3ka**



**Oxazonine-fused endoperoxide 3ka**, a light yellow solid, 0.097 g, 74% yield. Mp: 135–136 °C; <sup>1</sup>H NMR (400 MHz, CDCl<sub>3</sub>): δ 7.44 (d, *J* = 7.6 Hz, 2H), 7.35–7.19 (m, 8H), 7.17–7.03 (m, 8H), 6.88 (d, *J* = 7.2 Hz, 2H), 6.52 (d, *J* = 15.6 Hz, 1H), 6.07–5.99 (m, 1H), 5.95–5.89 (m, 1H), 5.60–5.55 (m, 1H), 5.40–5.35 (m, 1H), 4.67–4.52 (m, 2H), 4.10 (s, 1H), 3.41–3.40 (m, 1H), 3.15–3.13 (m, 1H), 2.45–2.38 (m, 1H), 2.10–2.04 (m, 1H), 1.23–1.16 (m, 4H), 1.05–1.00 (m, 2H), 0.82–0.79 (m, 2H), 0.72 (d, *J* = 6.8 Hz, 3H); <sup>13</sup>C NMR (100 MHz, CDCl<sub>3</sub>): δ 172.3, 169.2, 142.9, 136.6, 136.5, 135.7, 135.4, 129.8, 129.3, 128.6, 128.5, 128.4, 128.3, 128.2, 128.1, 128.0, 127.8, 126.9, 126.6, 126.5, 124.5, 122.1, 79.6, 77.8, 65.4, 63.4, 51.8, 51.7, 49.2, 31.1, 28.1, 22.8, 13.7, 11.2, 9.4; IR (thin film) 3021, 2959, 1734, 1493, 1156, 694 cm<sup>-1</sup>; HRMS (ESI) *m/z* calcd for C<sub>43</sub>H<sub>44</sub>NO<sub>5</sub> [M + H]<sup>+</sup>: 654.3214, found: 654.3205.

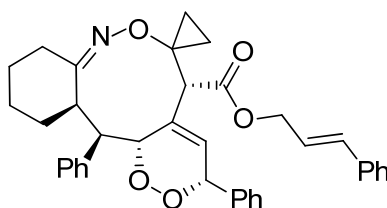

**3la**

**Oxazonine-fused endoperoxide 3la**, a light yellow oil, 0.037 g, 32% yield. <sup>1</sup>H NMR (400 MHz, CDCl<sub>3</sub>): δ 7.43–7.42 (m, 5H), 7.38–7.30 (m, 8H), 7.28–7.25 (m, 2H), 6.65 (d, *J* = 16.0 Hz, 1H), 6.50–6.47 (m, 1H), 6.26 (dt, *J* = 16.0 Hz, 6.0 Hz, 1H), 5.78–5.75 (m, 1H), 4.80–4.79 (m, 1H), 4.74 (d, *J* = 6.0 Hz, 2H), 4.34 (s, 1H), 3.92–3.85 (m, 2H), 2.22–2.18 (m, 1H), 1.92–1.90 (m, 2H), 1.78–1.75 (m, 1H), 1.59–1.57 (m, 2H), 1.28–1.20 (m, 2H), 1.15–1.10 (m, 2H), 0.86–0.82 (m, 2H); <sup>13</sup>C NMR (150MHz, CDCl<sub>3</sub>): δ 176.6, 169.8, 142.8, 135.9, 135.4, 134.8, 134.3, 130.5, 129.5, 129.2, 128.9, 128.6, 128.5, 128.1, 128.0, 127.0, 126.6, 122.3, 87.9, 81.3, 65.5, 63.0, 60.6, 48.2, 37.3, 34.1, 31.5, 27.1, 22.0, 10.5, 10.4; IR (thin film) 3027, 2919, 1738, 1452, 1261, 1090, 697 cm<sup>-1</sup>; HRMS (ESI) *m/z* calcd for C<sub>37</sub>H<sub>38</sub>NO<sub>5</sub> [M + H]<sup>+</sup>: 576.2744, found: 576.2741.

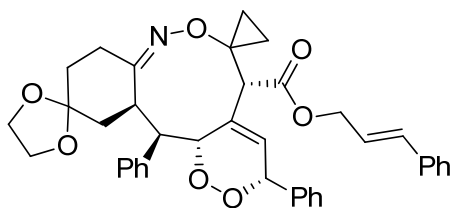

**3ma**

**Oxazonine-fused endoperoxide 3ma**, a light yellow oil, 0.062 g, 49% yield.  $^1\text{H}$  NMR (400 MHz,  $\text{CDCl}_3$ ):  $\delta$  7.54–7.53 (m, 3H), 7.40–7.28 (m, 11H), 7.22–7.18 (m, 1H), 6.72 (d,  $J = 16.0$  Hz, 1H), 6.34 (dt,  $J = 16.0$  Hz, 6.0 Hz, 1H), 6.15–6.10 (m, 1H), 5.84–5.80 (m, 1H), 4.96–4.95 (m, 1H), 4.86–4.75 (m, 2H), 3.98–3.74 (m, 6H), 3.35 (s, 1H), 2.42–2.37 (m, 1H), 2.22–2.17 (m, 1H), 1.76–1.68 (m, 4H), 1.42–1.37 (m, 2H), 1.16–1.10 (m, 1H), 0.77–0.74 (m, 1H);  $^{13}\text{C}$  NMR (100 MHz,  $\text{CDCl}_3$ ):  $\delta$  173.1, 171.3, 141.9, 136.1, 135.5, 134.1, 133.8, 129.9, 129.7, 129.6, 129.5, 128.8, 128.6, 128.2, 128.1, 126.6, 126.5, 122.9, 108.2, 86.8, 81.4, 65.8, 64.4, 64.3, 62.1, 57.0, 52.5, 39.9, 38.9, 33.7, 29.6, 13.0, 11.3; IR (thin film) 3023, 2930, 1731, 1457, 1263, 1091, 698  $\text{cm}^{-1}$ ; HRMS (ESI)  $m/z$  calcd for  $\text{C}_{39}\text{H}_{40}\text{NO}_7$  [ $\text{M} + \text{H}$ ] $^+$ : 634.2799, found: 634.2787.

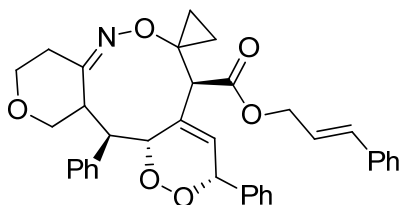

**3na**

**Oxazonine-fused endoperoxide 3na**, a light yellow solid, 0.059 g, 51% yield. Mp: 165–166  $^{\circ}\text{C}$ ;  $^1\text{H}$  NMR (400 MHz,  $\text{CDCl}_3$ ):  $\delta$  7.41–7.35 (m, 5H), 7.31–7.22 (m, 10H), 6.67 (d,  $J = 16.0$  Hz, 1H), 6.26 (dt,  $J = 16.0$  Hz, 6.4 Hz, 1H), 5.83–5.78 (m, 2H), 5.20–5.18 (m, 1H), 4.77–4.69 (m, 2H), 4.06–4.02 (m, 2H), 3.88–3.83 (m, 1H), 3.74–3.72 (m, 1H), 3.50–3.43 (m, 1H), 3.27 (d,  $J = 7.2$  Hz, 1H), 3.08–3.04 (m, 1H), 2.66–2.63 (m, 2H), 1.25–1.20 (m, 2H), 1.06–1.02 (m, 1H), 0.67–0.63 (m, 1H);  $^{13}\text{C}$  NMR (100 MHz,  $\text{CDCl}_3$ ):  $\delta$  170.6, 169.8, 140.9, 135.8, 135.6, 135.4, 134.9, 129.5, 129.4, 128.9, 128.6, 128.5, 128.4, 128.3, 126.9, 126.8, 126.6, 122.0, 85.3, 81.0, 71.4, 66.6, 65.7, 61.3, 52.0, 50.7, 43.7, 32.1, 10.0, 9.9; IR (thin film) 3025, 2963, 1735,

1618, 1260, 1018, 703  $\text{cm}^{-1}$ ; HRMS (ESI)  $m/z$  calcd for  $\text{C}_{36}\text{H}_{36}\text{NO}_6$   $[\text{M} + \text{H}]^+$ : 578.2537, found: 578.2536.

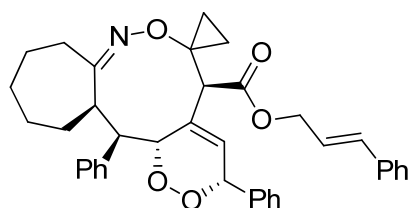

**30a**

**Oxazonine-fused endoperoxide 30a**, a light yellow solid, 0.053 g, 45% yield. Mp: 113–114  $^{\circ}\text{C}$ ;  $^1\text{H}$  NMR (400 MHz,  $\text{CDCl}_3$ ):  $\delta$  7.36–7.22 (m, 14H), 7.19 (d,  $J = 7.2$  Hz, 1H), 6.71 (d,  $J = 15.6$  Hz, 1H), 6.30–6.23 (m, 1H), 5.95–5.88 (m, 1H), 5.69–5.67 (m, 1H), 5.65–5.63 (m, 1H), 4.82 (d,  $J = 6.4$  Hz, 2H), 3.76–3.74 (m, 1H), 3.53 (s, 1H), 3.45–3.43 (m, 1H), 2.29–2.26 (m, 1H), 1.98–1.60 (m, 7H), 1.35–1.14 (m, 5H), 0.74–0.71 (m, 1H);  $^{13}\text{C}$  NMR (100 MHz,  $\text{CDCl}_3$ ):  $\delta$  179.9, 170.5, 141.1, 136.1, 136.0, 135.9, 134.5, 129.7, 129.1, 128.6, 128.5, 128.4, 128.2, 128.0, 127.9, 126.6, 126.5, 122.6, 82.2, 81.0, 65.5, 64.1, 56.1, 54.6, 45.8, 32.8, 31.1, 29.6, 28.7, 28.1, 10.9, 9.3; IR (thin film) 3028, 2930, 1733, 1494, 1148, 1022, 696  $\text{cm}^{-1}$ ; HRMS (ESI)  $m/z$  calcd for  $\text{C}_{38}\text{H}_{40}\text{NO}_5$   $[\text{M} + \text{H}]^+$ : 590.2901, found: 590.2901.

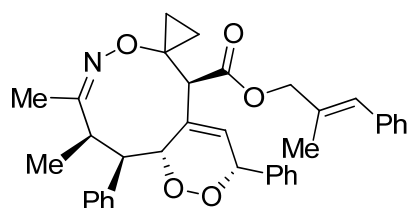

**3ab**

**Oxazonine-fused endoperoxide 3ab**, a light yellow solid, 0.077 g, 69% yield. Mp: 138–139  $^{\circ}\text{C}$ ;  $^1\text{H}$  NMR (400 MHz,  $\text{CDCl}_3$ ):  $\delta$  7.37 (d,  $J = 7.6$  Hz, 2H), 7.32–7.14 (m, 11H), 7.00 (d,  $J = 7.2$  Hz, 2H), 6.51 (s, 1H), 5.87–5.83 (m, 1H), 5.68–5.63 (m, 1H), 5.51–5.46 (m, 1H), 4.70 (d,  $J = 12.0$  Hz, 1H), 4.57 (d,  $J = 12.0$  Hz, 1H), 4.02 (s, 1H), 3.39–3.38 (m, 1H), 2.79–2.74 (m, 1H), 1.94 (s, 3H), 1.76 (s, 3H), 1.51 (d,  $J = 7.2$  Hz, 3H), 1.30–1.25 (m, 1H), 1.19–1.15 (m, 1H), 1.10–1.06 (m, 1H), 0.85–0.81 (m, 1H);  $^{13}\text{C}$  NMR (100 MHz,  $\text{CDCl}_3$ ):  $\delta$  172.4, 169.5, 142.8, 136.6, 136.4, 135.5, 131.9, 129.6,

129.3, 128.8, 128.5, 128.2, 128.1, 127.9, 127.8, 126.8, 126.4, 125.0, 79.8, 77.6, 70.8, 62.8, 50.9, 49.8, 45.9, 21.6, 15.6, 12.5, 11.1, 9.3; IR (thin film) 3023, 2965, 1736, 1492, 1148, 1026, 699  $\text{cm}^{-1}$ ; HRMS (ESI)  $m/z$  calcd for  $\text{C}_{36}\text{H}_{38}\text{NO}_5$   $[\text{M} + \text{H}]^+$ : 564.2744, found: 564.2738.

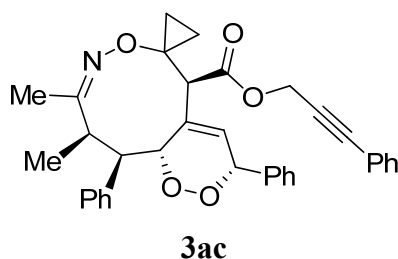

**Oxazonine-fused endoperoxide 3ac**, a light yellow solid, 0.084 g, 77% yield. Mp: 150–151  $^{\circ}\text{C}$ ;  $^1\text{H}$  NMR (400 MHz,  $\text{CDCl}_3$ ):  $\delta$  7.37 (d,  $J = 7.6$  Hz, 2H), 7.30–7.24 (m, 7H), 7.18–7.13 (m, 4H), 7.00 (d,  $J = 6.4$  Hz, 2H), 5.86–5.83 (m, 1H), 5.75–5.72 (m, 1H), 5.50–5.47 (m, 1H), 4.93–4.83 (m, 2H), 4.11 (s, 1H), 3.36–3.35 (m, 1H), 2.75–2.70 (m, 1H), 1.96 (s, 3H), 1.52 (d,  $J = 7.2$  Hz, 3H), 1.26–1.16 (m, 2H), 1.09–1.04 (m, 1H), 0.89–0.85 (m, 1H);  $^{13}\text{C}$  NMR (100 MHz,  $\text{CDCl}_3$ ):  $\delta$  172.4, 168.9, 142.8, 136.3, 135.2, 131.7, 129.3, 128.7, 128.5, 128.3, 128.2, 127.9, 127.8, 126.4, 124.8, 121.7, 86.8, 82.1, 79.8, 77.3, 62.7, 53.0, 50.8, 48.9, 46.1, 21.7, 12.2, 11.2, 9.3; IR (thin film) 3021, 2954, 2217, 1735, 1490, 1145, 1026, 693  $\text{cm}^{-1}$ ; HRMS (ESI)  $m/z$  calcd for  $\text{C}_{35}\text{H}_{34}\text{NO}_5$   $[\text{M} + \text{H}]^+$ : 548.2431, found: 548.2432.

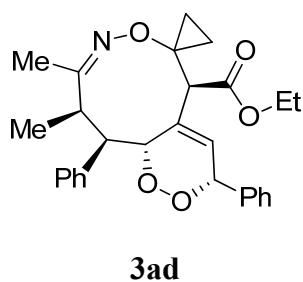

**Oxazonine-fused endoperoxide 3ad**, a light yellow solid, 0.070 g, 76% yield. Mp: 133–134  $^{\circ}\text{C}$ ;  $^1\text{H}$  NMR (400 MHz,  $\text{CDCl}_3$ ):  $\delta$  7.37 (d,  $J = 7.2$  Hz, 2H), 7.29–7.16 (m, 6H), 7.03–7.02 (m, 2H), 5.85–5.80 (m, 1H), 5.65–5.62 (m, 1H), 5.54–5.48 (m, 1H), 4.14 (q,  $J = 6.8$  Hz, 2H), 3.97 (s, 1H), 3.36–3.35 (m, 1H), 2.78–2.72 (m, 1H), 1.95 (s, 3H), 1.51 (d,  $J = 6.8$  Hz, 3H), 1.28–1.25 (m, 1H), 1.23 (t,  $J = 7.2$  Hz, 3H), 1.18–1.13

(m, 1H), 1.07–1.02 (m, 1H), 0.82–0.76 (m, 1H);  $^{13}\text{C}$  NMR (100 MHz,  $\text{CDCl}_3$ ):  $\delta$  172.4, 169.6, 142.9, 136.5, 135.4, 129.3, 128.5, 128.2, 127.9, 127.8, 126.4, 124.8, 79.8, 77.6, 62.8, 60.8, 50.8, 49.5, 45.9, 21.6, 14.0, 12.4, 11.2, 9.3; IR (thin film) 3023, 2968, 1725, 1651, 1452, 1248, 1035, 697  $\text{cm}^{-1}$ ; HRMS (ESI)  $m/z$  calcd for  $\text{C}_{28}\text{H}_{32}\text{NO}_5$   $[\text{M} + \text{H}]^+$ : 462.2275, found: 462.2272.

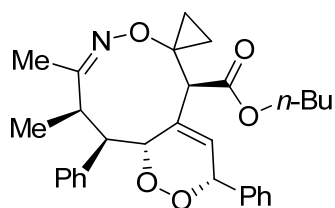

**3ae**

**Oxazonine-fused endoperoxide**, a light yellow solid, 0.059 g, 60% yield. Mp: 120–121  $^{\circ}\text{C}$ ;  $^1\text{H}$  NMR (400 MHz,  $\text{CDCl}_3$ ):  $\delta$  7.37 (d,  $J = 7.6$  Hz, 2H), 7.29–7.16 (m, 6H), 7.02–7.01 (m, 2H), 5.85–5.80 (m, 1H), 5.63–5.60 (m, 1H), 5.50–5.47 (m, 1H), 4.12–3.99 (m, 2H), 3.96 (s, 1H), 3.37–3.36 (m, 1H), 2.79–2.73 (m, 1H), 1.95 (s, 3H), 1.60–1.54 (m, 3H), 1.51 (d,  $J = 7.2$  Hz, 3H), 1.32–1.23 (m, 4H), 1.19–1.04 (m, 2H), 0.86 (t,  $J = 7.6$  Hz, 3H), 0.80–0.76 (m, 1H);  $^{13}\text{C}$  NMR (100 MHz,  $\text{CDCl}_3$ ):  $\delta$  172.4, 169.7, 142.9, 136.5, 135.5, 129.3, 128.5, 128.2, 128.0, 127.9, 126.4, 124.9, 79.8, 77.6, 64.7, 62.8, 50.9, 49.8, 45.9, 30.4, 21.6, 19.0, 13.5, 12.5, 11.1, 9.3; IR (thin film) 3024, 2955, 1732, 1637, 1261, 1083, 698  $\text{cm}^{-1}$ ; HRMS (ESI)  $m/z$  calcd for  $\text{C}_{30}\text{H}_{36}\text{NO}_5$   $[\text{M} + \text{H}]^+$ : 490.2588, found: 490.2590.

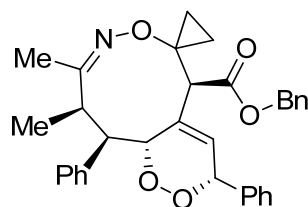

**3af**

**Oxazonine-fused endoperoxide 3af**, a light yellow solid, 0.073 g, 70% yield. Mp: 88–89  $^{\circ}\text{C}$ ;  $^1\text{H}$  NMR (400 MHz,  $\text{CDCl}_3$ ):  $\delta$  7.35 (d,  $J = 7.6$  Hz, 2H), 7.27–7.16 (m, 11H), 6.98 (d,  $J = 6.8$  Hz, 2H), 5.84–5.80 (m, 1H), 5.55–5.53 (m, 1H), 5.46–5.42 (m, 1H), 5.13 (d,  $J = 12.0$  Hz, 1H), 5.03 (d,  $J = 12.0$  Hz, 1H), 4.02 (s, 1H), 3.34–3.33 (m,

1H), 2.74–2.69 (m, 1H), 1.92 (s, 3H), 1.49 (d,  $J = 7.2$  Hz, 3H), 1.27–1.15 (m, 1H), 1.13–1.10 (m, 1H), 1.06–1.01 (m, 1H), 0.80–0.74 (m, 1H);  $^{13}\text{C}$  NMR (100 MHz,  $\text{CDCl}_3$ ):  $\delta$  172.3, 169.5, 142.8, 136.4, 135.4, 135.0, 129.3, 128.6, 128.5, 128.4, 128.3, 128.2, 127.9, 127.8, 126.4, 124.8, 79.7, 77.4, 66.7, 62.7, 50.8, 49.3, 45.9, 21.6, 12.3, 11.1, 9.3; IR (thin film) 3032, 2955, 1733, 1493, 1149, 1000, 699  $\text{cm}^{-1}$ ; HRMS (ESI)  $m/z$  calcd for  $\text{C}_{33}\text{H}_{34}\text{NO}_5$  [ $\text{M} + \text{H}$ ] $^+$ : 524.2431, found: 524.2429.

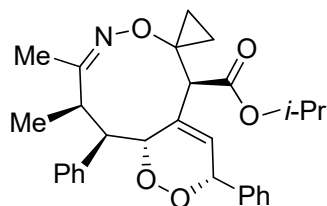

**3ag**

**Oxazonine-fused endoperoxide 3ag**, a light yellow solid, 0.061 g, 64% yield. Mp: 139–140  $^{\circ}\text{C}$ ;  $^1\text{H}$  NMR (400 MHz,  $\text{CDCl}_3$ ):  $\delta$  7.37 (d,  $J = 7.2$  Hz, 2H), 7.28–7.15 (m, 6H), 7.03–7.02 (m, 2H), 5.85–5.80 (m, 1H), 5.65–5.63 (m, 1H), 5.53–5.48 (m, 1H), 5.01–4.95 (m, 1H), 3.92 (s, 1H), 3.37–3.36 (m, 1H), 2.78–2.73 (m, 1H), 1.95 (s, 3H), 1.51 (d,  $J = 7.2$  Hz, 3H), 1.25 (d,  $J = 6.4$  Hz, 3H), 1.23–1.24 (m, 1H), 1.17–1.16 (m, 1H), 1.13 (d,  $J = 6.4$  Hz, 3H), 1.05–1.01 (m, 1H), 0.85–0.82 (m, 1H);  $^{13}\text{C}$  NMR (100 MHz,  $\text{CDCl}_3$ ):  $\delta$  172.3, 169.1, 142.9, 136.5, 135.7, 129.3, 128.5, 128.2, 127.9, 127.8, 126.4, 124.8, 79.8, 77.6, 68.4, 62.7, 50.8, 49.5, 45.9, 21.8, 21.7, 21.6, 12.4, 11.0, 9.3; IR (thin film) 3025, 2916, 1724, 1493, 1166, 1095, 699  $\text{cm}^{-1}$ ; HRMS (ESI)  $m/z$  calcd for  $\text{C}_{29}\text{H}_{34}\text{NO}_5$  [ $\text{M} + \text{H}$ ] $^+$ : 476.2431, found: 476.2432.

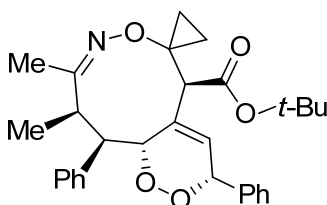

**3ah**

**Oxazonine-fused endoperoxide 3ah**, a light yellow solid, 0.055 g, 56% yield. Mp: 134–135  $^{\circ}\text{C}$ ;  $^1\text{H}$  NMR (400 MHz,  $\text{CDCl}_3$ ):  $\delta$  7.36 (d,  $J = 7.6$  Hz, 2H), 7.28–7.15 (m, 6H), 7.04–7.03 (m, 2H), 5.83–5.78 (m, 1H), 5.70–5.68 (m, 1H), 5.52–5.50 (m, 1H), 3.82 (s, 1H), 3.36–3.35 (m, 1H), 2.79–2.73 (m, 1H), 1.94 (s, 3H), 1.50 (d,  $J = 7.2$  Hz,

3H), 1.40 (s, 9H), 1.29–1.21 (m, 1H), 1.18–1.12 (m, 1H), 1.06–1.00 (m, 1H), 0.88–0.83 (m, 1H);  $^{13}\text{C}$  NMR (100 MHz,  $\text{CDCl}_3$ ):  $\delta$  172.3, 168.9, 142.9, 136.5, 136.1, 129.3, 128.5, 128.2, 127.9, 127.4, 126.3, 124.6, 81.7, 79.7, 77.7, 62.8, 50.8, 50.2, 45.8, 27.9, 21.6, 12.5, 10.9, 9.3; IR (thin film) 3022, 2968, 1725, 1491, 1142, 1072, 700  $\text{cm}^{-1}$ ; HRMS (ESI)  $m/z$  calcd for  $\text{C}_{30}\text{H}_{36}\text{NO}_5$   $[\text{M} + \text{H}]^+$ : 490.2588, found: 490.2587.

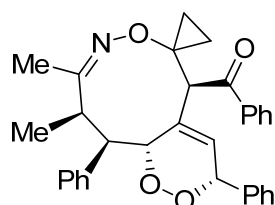

**3ai**

**Oxazonine-fused endoperoxide 3ai**, a light yellow oil, 0.073 g, 74% yield.  $^1\text{H}$  NMR (400 MHz,  $\text{CDCl}_3$ ):  $\delta$  7.97 (d,  $J = 7.6$  Hz, 2H), 7.60 (t,  $J = 7.2$  Hz, 1H), 7.51–7.47 (m, 2H), 7.38 (d,  $J = 7.6$  Hz, 2H), 7.30–7.25 (m, 2H), 7.20–7.17 (m, 1H), 7.15–7.07 (m, 3H), 6.86 (d,  $J = 7.2$  Hz, 2H), 5.95–5.91 (m, 1H), 5.64–5.60 (m, 1H), 5.50–5.45 (m, 1H), 5.11 (s, 1H), 3.44–3.43 (m, 1H), 2.77–2.72 (m, 1H), 2.05 (s, 3H), 1.61 (d,  $J = 7.2$  Hz, 3H), 1.25–1.23 (m, 1H), 1.15–1.03 (m, 2H), 0.82–0.79 (m, 1H);  $^{13}\text{C}$  NMR (100 MHz,  $\text{CDCl}_3$ ):  $\delta$  197.2, 172.3, 142.8, 138.3, 136.5, 135.9, 133.3, 129.2, 128.8, 128.3, 128.2, 128.1, 127.9, 127.8, 126.5, 125.7, 79.8, 77.3, 63.0, 50.8, 47.0, 46.7, 22.0, 12.1, 11.4, 9.1; IR (thin film) 3022, 2963, 1683, 1449, 1251, 1019, 697  $\text{cm}^{-1}$ ; HRMS (ESI)  $m/z$  calcd for  $\text{C}_{32}\text{H}_{32}\text{NO}_4$   $[\text{M} + \text{H}]^+$ : 494.2326, found: 494.2341.

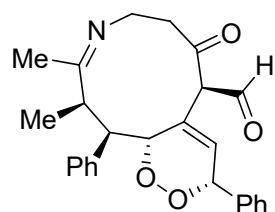

**3aj**

**Oxazecine-fused endoperoxide 3aj**, a light yellow oil, 0.033 g, 39% yield.  $^1\text{H}$  NMR (400 MHz,  $\text{CDCl}_3$ ):  $\delta$  9.88 (s, 1H), 7.36–7.32 (m, 3H), 7.30–7.25 (m, 5H), 7.24–7.18 (m, 2H), 5.81–5.76 (m, 1H), 5.54–5.51 (m, 2H), 3.20–3.11 (m, 2H), 2.96–2.91 (m, 2H), 2.90–2.84 (m, 2H), 2.46–2.42 (m, 1H), 1.83 (s, 3H), 0.92 (d,  $J = 7.2$  Hz, 3H);  $^{13}\text{C}$  NMR (100 MHz,  $\text{CDCl}_3$ ):  $\delta$  206.1, 200.0, 140.0, 139.1, 138.3, 133.3, 132.7, 128.4,

128.3, 128.2, 128.1, 126.7, 119.0, 80.7, 73.2, 46.4, 42.6, 36.9, 36.8, 36.0, 19.1, 14.1; IR (thin film) 3023, 2963, 2825, 2720, 1710, 1699, 1452, 1261, 698  $\text{cm}^{-1}$ ; HRMS (ESI)  $m/z$  calcd for  $\text{C}_{26}\text{H}_{28}\text{NO}_4$   $[\text{M} + \text{H}]^+$ : 418.2013, found: 418.1991.

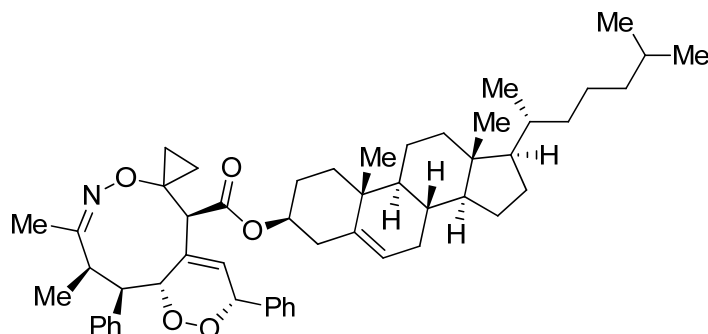

**3ak** ( $dr = 1:1$ )

**Oxazonine-fused endoperoxide 3ak**,  $dr = 1:1$ , a light yellow oil, 0.077 g, 48% yield. *one isomer*:  $^1\text{H}$  NMR (400 MHz,  $\text{CDCl}_3$ ):  $\delta$  7.38 (d,  $J = 7.2$  Hz, 2H), 7.28–7.18 (m, 7H), 7.03–7.02 (m, 2H), 5.85–5.80 (m, 1H), 5.65–5.62 (m, 1H), 5.54–5.48 (m, 1H), 4.58–4.57 (m, 1H), 3.93 (s, 1H), 3.36–3.35 (m, 1H), 2.76–2.74 (m, 1H), 2.32–2.25 (m, 3H), 2.10–2.00 (m, 2H), 1.96 (s, 3H), 1.86–1.78 (m, 3H), 1.65–1.54 (m, 6H), 1.51 (d,  $J = 7.2$  Hz, 3H), 1.45–1.39 (m, 4H), 1.37–1.20 (m, 7H), 1.14–1.02 (m, 7H), 0.99 (s, 3H), 0.91 (d,  $J = 6.4$  Hz, 3H), 0.86 (d,  $J = 6.0$  Hz, 6H), 0.66 (s, 3H);  $^{13}\text{C}$  NMR (100 MHz,  $\text{CDCl}_3$ ):  $\delta$  172.3, 169.0, 142.9, 139.2, 136.5, 135.6, 129.3, 128.6, 128.2, 127.9, 127.8, 126.4, 124.9, 122.9, 79.8, 77.7, 74.7, 62.8, 56.6, 56.1, 50.8, 49.9, 49.5, 46.0, 42.2, 39.6, 39.5, 37.9, 36.8, 36.5, 36.1, 35.7, 31.9, 31.8, 28.2, 28.0, 27.7, 24.2, 23.8, 22.8, 21.7, 20.9, 19.2, 18.6, 12.5, 11.8, 11.1, 9.4; *another isomer*:  $^1\text{H}$  NMR (400 MHz,  $\text{CDCl}_3$ ):  $\delta$  7.38 (d,  $J = 7.2$  Hz, 2H), 7.28–7.18 (m, 7H), 7.03–7.02 (m, 2H), 5.85–5.80 (m, 1H), 5.65–5.62 (m, 1H), 5.54–5.48 (m, 1H), 4.58–4.57 (m, 1H), 3.93 (s, 1H), 3.36–3.35 (m, 1H), 2.76–2.74 (m, 1H), 2.32–2.25 (m, 3H), 2.10–2.00 (m, 2H), 1.96 (s, 3H), 1.86–1.78 (m, 3H), 1.65–1.54 (m, 6H), 1.51 (d,  $J = 7.2$  Hz, 3H), 1.45–1.39 (m, 4H), 1.37–1.20 (m, 7H), 1.14–1.02 (m, 7H), 0.99 (s, 3H), 0.91 (d,  $J = 6.4$  Hz, 3H), 0.86 (d,  $J = 6.0$  Hz, 6H), 0.66 (s, 3H);  $^{13}\text{C}$  NMR (100 MHz,  $\text{CDCl}_3$ ):  $\delta$  172.3, 169.0, 142.9, 139.2, 136.5, 135.6, 129.3, 128.6, 128.2, 127.9, 127.8, 126.4, 124.9, 122.8, 79.8, 77.7, 74.7, 62.8, 56.6, 56.1, 50.8, 49.9, 49.5, 45.9, 42.2, 39.6, 39.5, 37.8, 36.8, 36.5, 36.1, 35.7, 31.9, 31.8, 28.2, 28.0, 27.5, 24.2, 23.8, 22.5, 21.7, 20.9, 19.2, 18.6,



12.4, 11.8, 11.1, 9.4; IR (thin film) 3021, 2959, 1732, 1454, 1261, 1026, 698  $\text{cm}^{-1}$ ;  
HRMS (ESI)  $m/z$  calcd for  $\text{C}_{53}\text{H}_{72}\text{NO}_5$   $[\text{M} + \text{H}]^+$ : 802.5405, found: 802.5410.

### 3. Synthesis of compound *trans*-3aa

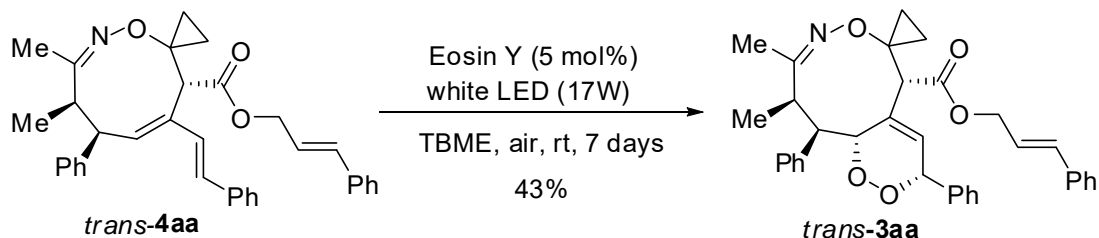

An oven-dried glass vial equipped with a magnetic stirrer was charged with the *trans*-4aa (0.2 mmol, 0.103 g), Eosin Y (5 mol%, 0.01 mmol, 0.006 g) and TBME (2 mL). The vial was closed with a plastic wrap. Afterwards, the reaction mixture was stirred and irradiated (17 W white LED) at room temperature for 7 days until *trans*-4aa was consumed completely (monitored by TLC). At this time, the solvent was removed under reduced pressure and the crude product was purified by flash column chromatography (the crude residue was dry loaded with silica gel, 1/20, ethyl acetate/petroleum ether) to provide compound *trans*-3aa as a light yellow oil (0.047 g, 43%).  $^1\text{H}$  NMR (400 MHz,  $\text{CDCl}_3$ ):  $\delta$  7.40–7.25 (m, 15H), 6.67 (d,  $J = 16.0$  Hz, 1H), 6.52–6.50 (m, 1H), 6.28–6.21 (m, 1H), 5.75–5.74 (m, 1H), 5.03–5.01 (m, 1H), 4.76 (d,  $J = 6.0$  Hz, 2H), 4.39 (s, 1H), 3.88–3.87 (m, 1H), 3.77–3.76 (m, 1H), 1.29 (s, 3H), 1.22–1.18 (m, 1H), 1.17 (d,  $J = 7.2$  Hz, 3H), 1.12–1.08 (m, 1H), 0.88–0.82 (m, 2H);  $^{13}\text{C}$  NMR (100 MHz,  $\text{CDCl}_3$ ):  $\delta$  174.5, 169.7, 140.7, 136.0, 135.6, 135.2, 134.4, 130.0, 129.4, 129.1, 128.8, 128.6, 128.5, 128.1, 127.8, 127.0, 126.6, 122.3, 85.7, 81.1, 65.5, 63.2, 59.1, 48.2, 35.7, 18.0, 17.3, 10.6, 10.1; IR (thin film) 3021, 2964, 1734, 1643, 1451, 1148, 1001, 697  $\text{cm}^{-1}$ ; HRMS (ESI)  $m/z$  calcd for  $\text{C}_{35}\text{H}_{36}\text{NO}_5$   $[\text{M} + \text{H}]^+$ : 550.2588, found: 550.2601.

#### 4. Trapping experiment of *cis-4aa* to *cis-3aa*

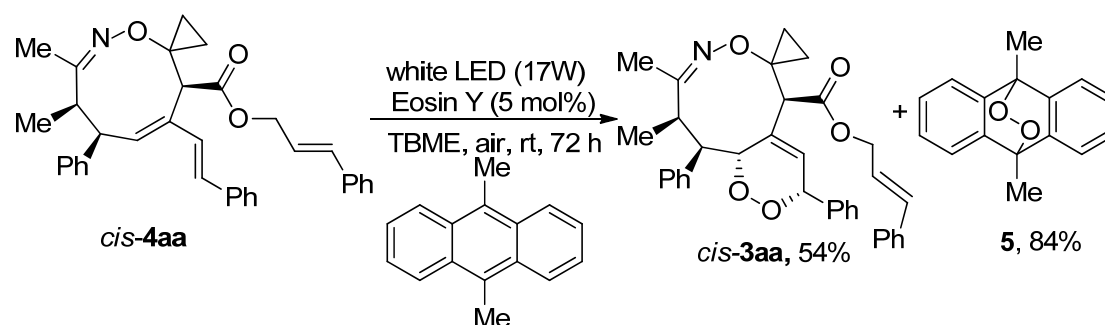

An oven-dried glass vial equipped with a magnetic stirrer was charged with the *cis-4aa* (0.2 mmol, 0.103 g), 9,10-dimethylanthracene (2 equiv., 0.082 g), Eosin Y (5 mol%, 0.01 mmol, 0.006 g) and TBME (2 mL). The vial was closed with a plastic wrap. Afterwards, the reaction mixture was stirred and irradiated (17 W white LED) at room temperature for 72 h. At this time, the solvent was removed under reduced pressure and the crude product was purified by flash column chromatography (the crude residue was dry loaded with silica gel, 1/30-1/20, ethyl acetate/petroleum ether) to provide compound *cis-3aa* (0.059 g, 54%) and compound **5** as a white solid (0.084 g, 84%). Compound **5**:  $^1\text{H NMR}$  (400 MHz,  $\text{CDCl}_3$ ):  $\delta$  7.38–7.36 (m, 4H), 7.26–7.24 (m, 4H), 2.12 (s, 6H);  $^{13}\text{C NMR}$  (100 MHz,  $\text{CDCl}_3$ ):  $\delta$  140.7, 127.3, 120.6, 79.4, 13.6. The spectral data matched literature values.<sup>[4]</sup>

#### 5. Synthesis of compounds **6**

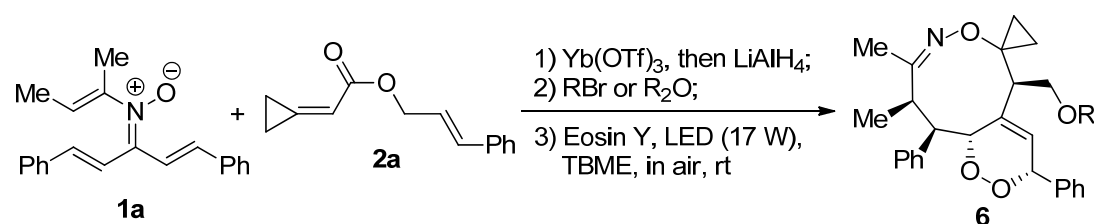

**General procedure B:** In a 25 mL round-bottom flask was charged with *N*-vinyl nitronium salt **1a** (0.2 mmol, 0.061 g),  $\text{Yb}(\text{OTf})_3$  (20 mol%, 0.04 mmol, 0.025 g) and TBME (2.0 mL) under an air atmosphere. And then, methylenecyclopropane **2a** (0.4 mmol, 2.0 equiv., 0.086 g) was added in one portion at room temperature. The mixture was stirred vigorously at room temperature for 36–48 h until nitronium salt **1a** was consumed completely (monitored by TLC). At this time,  $\text{LiAlH}_4$  (0.4 mmol, 2.0 equiv. 0.030 g)

was added at 0 °C. Then, the reaction mixture was stirred vigorously at 0 °C for 0.5 h until substrate disappeared (monitored by TLC). At this time, the reaction was quenched with H<sub>2</sub>O (10 mL) and extracted with Et<sub>2</sub>O (20 mL). The combined organic layers were washed with brine (10 mL), dried over Na<sub>2</sub>SO<sub>4</sub>, and filtered. The solvents were removed under the reduced pressure. The crude product was used directly in the next step.

In a round-bottom flask was charged with the above alcohol and MeCN (2 mL). NaH (60% in mineral oil, 5 equiv., 1.0 mmol, 0.040 g) was added at 0 °C and allowed to stir for 30 min at 0 °C. After adding MeI or RBr (5 equiv. 1 mmol), the solution was then allowed to stir at room temperature for 3-12 h minutes until the substrate disappeared (monitored by TLC). At this time, the reaction was quenched with H<sub>2</sub>O (10 mL) and extracted with Et<sub>2</sub>O (20 mL). The combined organic layers were washed with brine (10 mL), dried over Na<sub>2</sub>SO<sub>4</sub>, and filtered. The solvents were removed under the reduced pressure and the crude product was used directly in the next step. [*Alternative method:* to a solution of the above alcohol in CH<sub>2</sub>Cl<sub>2</sub> (2 mL) were added Et<sub>3</sub>N (2.0 equiv., 0.4 mmol), 4-DMAP (1.0 equiv, 0.2 mmol) and anhydride R<sub>2</sub>O (5 equiv, 1 mmol) at rt. The reaction mixture was stirred for 12-24 h until the mixture was consumed completely (monitored by TLC). At this time, the reaction was quenched with H<sub>2</sub>O (10 mL) and extracted with CH<sub>2</sub>Cl<sub>2</sub> (20 mL). The combined organic layers were washed with brine (10 mL), dried over Na<sub>2</sub>SO<sub>4</sub>, and filtered. The solvents were removed under the reduced pressure and the crude product was used directly in the next step.]

An oven-dried glass vial equipped with a magnetic stirrer was charged with the above crude mixture, Eosin Y (5 mol%, 0.01 mmol, 0.006 g) and TBME (2 mL). The vial was closed with a plastic film. Then, the reaction mixture was stirred and irradiated (17 W white LED) at room temperature for 36–72 h until the mixture was consumed completely (monitored by TLC). At this time, the solvent was removed under reduced pressure and the crude product was purified by flash column chromatography (the crude residue was dry loaded with silica gel, 1/20 to 1/10, ethyl acetate/petroleum ether) to provide compounds **6**.

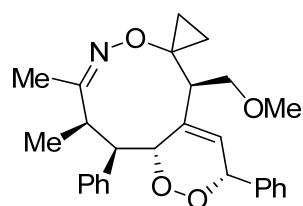

**6aa**

**Oxazonine-fused endoperoxide 6aa**, a light yellow solid, 0.056 g, 65% yield. Mp: 162–163 °C;  $^1\text{H}$  NMR (400 MHz,  $\text{CDCl}_3$ ):  $\delta$  7.26 (d,  $J = 7.2$  Hz, 2H), 7.20–7.17 (m, 5H), 7.11–7.08 (m, 1H), 7.04–7.03 (m, 2H), 5.69–5.65 (m, 1H), 5.58–5.54 (m, 1H), 5.48–5.46 (m, 1H), 3.58 (dd,  $J = 9.6$  Hz, 6.4 Hz, 1H), 3.40–3.38 (m, 2H), 3.19 (s, 3H), 2.98–2.97 (m, 1H), 2.86–2.84 (m, 1H), 1.79 (s, 3H), 1.36 (d,  $J = 7.2$  Hz, 3H), 1.09–1.03 (m, 1H), 0.97–0.92 (m, 1H), 0.87–0.82 (m, 1H), 0.75–0.70 (m, 1H);  $^{13}\text{C}$  NMR (100 MHz,  $\text{CDCl}_3$ ):  $\delta$  172.6, 142.6, 137.9, 136.9, 129.4, 128.5, 128.2, 128.1, 127.8, 126.4, 123.9, 80.2, 78.5, 71.2, 64.6, 58.7, 51.6, 43.9, 43.6, 20.9, 13.4, 11.4, 9.5; IR (thin film) 3023, 2935, 1732, 1601, 1452, 1116, 1019, 698  $\text{cm}^{-1}$ ; HRMS (ESI)  $m/z$  calcd for  $\text{C}_{27}\text{H}_{32}\text{NO}_4$  [ $\text{M} + \text{H}$ ] $^+$ : 434.2326, found: 434.2327.

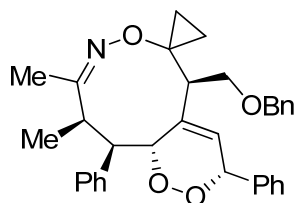

**6ab**

**Oxazonine-fused endoperoxide 6ab**, a light yellow oil, 0.066 g, 64% yield.  $^1\text{H}$  NMR (400 MHz,  $\text{CDCl}_3$ ):  $\delta$  7.26–7.25 (m, 12H), 7.18–7.15 (m, 1H), 7.12–7.10 (m, 2H), 5.81–5.78 (m, 1H), 5.58–5.55 (m, 2H), 4.49 (d,  $J = 12.0$  Hz, 1H), 4.40 (d,  $J = 12.0$  Hz, 1H), 3.72–3.60 (m, 2H), 3.48–3.47 (m, 1H), 3.08–3.06 (m, 1H), 2.97–2.92 (m, 1H), 1.83 (s, 3H), 1.40 (d,  $J = 7.2$  Hz, 3H), 1.12–1.00 (m, 2H), 0.92–0.80 (m, 2H);  $^{13}\text{C}$  NMR (100 MHz,  $\text{CDCl}_3$ ):  $\delta$  172.7, 142.6, 137.7, 137.5, 136.9, 129.4, 128.5, 128.4, 128.3, 128.2, 127.9, 127.8, 127.6, 126.3, 124.5, 80.3, 78.5, 73.3, 68.8, 64.8, 51.7, 44.0, 43.6, 20.8, 13.5, 11.3, 9.7; IR (thin film) 3029, 2912, 1454, 1255, 1018, 698  $\text{cm}^{-1}$ ; HRMS (ESI)  $m/z$  calcd for  $\text{C}_{33}\text{H}_{36}\text{NO}_4$  [ $\text{M} + \text{H}$ ] $^+$ : 510.2639, found: 510.2655.

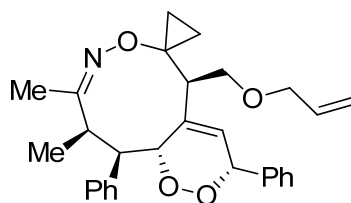

**6ac**

**Oxazonine-fused endoperoxide 6ac**, a light yellow solid, 0.062 g, 68% yield. Mp: 121–122 °C;  $^1\text{H}$  NMR (400 MHz,  $\text{CDCl}_3$ ):  $\delta$  7.33–7.24 (m, 7H), 7.19–7.12 (m, 3H), 5.89–5.79 (m, 2H), 5.63–5.62 (m, 1H), 5.56–5.54 (m, 1H), 5.25 (d,  $J = 17.2$  Hz, 1H), 5.17 (d,  $J = 10.0$  Hz, 1H), 3.96–3.85 (m, 2H), 3.71–3.55 (m, 2H), 3.50–3.49 (m, 1H), 3.09–3.08 (m, 1H), 2.95–2.90 (m, 1H), 1.86 (s, 3H), 1.43 (d,  $J = 7.2$  Hz, 3H), 1.14–1.10 (m, 1H), 1.06–1.01 (m, 1H), 0.95–0.90 (m, 1H), 0.84–0.79 (m, 1H);  $^{13}\text{C}$  NMR (100 MHz,  $\text{CDCl}_3$ ):  $\delta$  172.7, 142.6, 137.8, 136.9, 134.2, 129.5, 128.5, 128.3, 128.2, 127.8, 126.4, 124.3, 117.3, 80.3, 78.6, 72.1, 68.8, 64.7, 51.7, 44.1, 43.7, 20.9, 13.6, 11.3, 9.5; IR (thin film) 3024, 2901, 1600, 1453, 1106, 1015, 704  $\text{cm}^{-1}$ ; HRMS (ESI)  $m/z$  calcd for  $\text{C}_{29}\text{H}_{34}\text{NO}_4$  [ $\text{M} + \text{H}$ ] $^+$ : 460.2482, found: 460.2496.

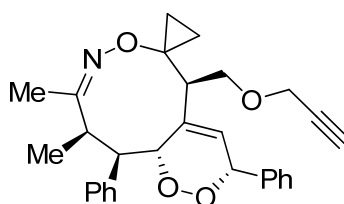

**6ad**

**Oxazonine-fused endoperoxide 6ad**, a light yellow solid, 0.056 g, 61% yield. Mp: 124–125 °C;  $^1\text{H}$  NMR (400 MHz,  $\text{CDCl}_3$ ):  $\delta$  7.35 (d,  $J = 7.2$  Hz, 2H), 7.28–7.24 (m, 5H), 7.20–7.16 (m, 1H), 7.12–7.11 (m, 2H), 5.83–5.80 (m, 1H), 5.65–5.64 (m, 1H), 5.57–5.54 (m, 1H), 4.09 (s, 2H), 3.85–3.81 (m, 1H), 3.67–3.64 (m, 1H), 3.48–3.47 (m, 1H), 3.07–3.05 (m, 1H), 2.97–2.95 (m, 1H), 2.36 (s, 1H), 1.88 (s, 3H), 1.44 (d,  $J = 7.2$  Hz, 3H), 1.14–1.12 (m, 1H), 1.04–1.01 (m, 2H), 0.84–0.81 (m, 1H);  $^{13}\text{C}$  NMR (100 MHz,  $\text{CDCl}_3$ ):  $\delta$  172.6, 142.6, 137.6, 136.9, 129.5, 128.5, 128.2, 128.1, 127.8, 126.4, 124.3, 80.2, 79.1, 78.4, 74.9, 68.3, 64.7, 58.1, 51.6, 43.8, 43.4, 21.0, 13.4, 11.3, 9.6; IR (thin film) 3451, 3032, 2865, 2110, 1634, 1453, 1254, 1055, 700  $\text{cm}^{-1}$ ; HRMS (ESI)  $m/z$  calcd for  $\text{C}_{29}\text{H}_{32}\text{NO}_4$  [ $\text{M} + \text{H}$ ] $^+$ : 458.2326, found: 458.2337.

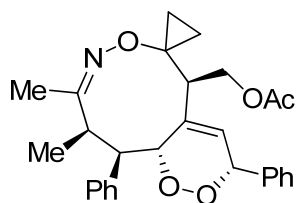

**6ae**

**Oxazonine-fused endoperoxide 6ae**, a light yellow solid, 0.074 g, 80% yield. Mp: 147–148 °C; <sup>1</sup>H NMR (400 MHz, CDCl<sub>3</sub>): δ 7.32 (d, *J* = 7.2 Hz, 2H), 7.28–7.24 (m, 5H), 7.19–7.15 (m, 1H), 7.12–7.11 (m, 2H), 5.70–5.67 (m, 1H), 5.58–5.57 (m, 1H), 5.54–5.50 (m, 1H), 4.42–4.37 (m, 1H), 4.21–4.18 (m, 1H), 3.51–3.50 (m, 1H), 3.11–3.09 (m, 1H), 2.98–2.95 (m, 1H), 2.00 (s, 3H), 1.86 (s, 3H), 1.42 (d, *J* = 7.2 Hz, 3H), 1.18–1.08 (m, 2H), 0.86–0.73 (m, 2H); <sup>13</sup>C NMR (100 MHz, CDCl<sub>3</sub>): δ 173.3, 170.6, 142.5, 137.1, 136.4, 129.4, 128.7, 128.3, 128.1, 127.8, 126.4, 125.0, 80.2, 78.6, 64.2, 63.0, 51.8, 44.0, 43.6, 20.8, 20.7, 13.8, 11.0, 8.8; IR (thin film) 3032, 2883, 1736, 1456, 1230, 1026, 698 cm<sup>-1</sup>; HRMS (ESI) *m/z* calcd for C<sub>28</sub>H<sub>32</sub>NO<sub>5</sub> [M + H]<sup>+</sup>: 462.2275, found: 462.2284.

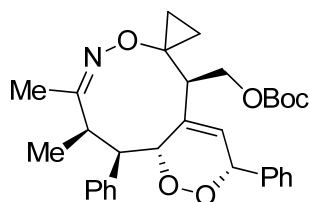

**6af**

**Oxazonine-fused endoperoxide 6af**, a light yellow solid, 0.065 g, 63% yield. Mp: 163–164 °C; <sup>1</sup>H NMR (400 MHz, CDCl<sub>3</sub>): δ 7.32 (d, *J* = 7.6 Hz, 2H), 7.27–7.24 (m, 5H), 7.19–7.15 (m, 1H), 7.13–7.12 (m, 2H), 5.76–5.73 (m, 1H), 5.54–5.52 (m, 2H), 4.51 (dd, *J* = 11.2 Hz, 8.4 Hz, 1H), 4.18 (dd, *J* = 11.6 Hz, 4.4 Hz, 1H), 3.54–3.53 (m, 1H), 3.16–3.15 (m, 1H), 2.94–2.92 (m, 1H), 1.84 (s, 3H), 1.43 (s, 9H), 1.41 (d, *J* = 7.2 Hz, 3H), 1.14–1.12 (m, 2H), 0.85–0.73 (m, 2H); <sup>13</sup>C NMR (100 MHz, CDCl<sub>3</sub>): δ 173.5, 153.2, 142.5, 136.9, 136.5, 129.5, 128.7, 128.3, 128.2, 127.8, 126.4, 125.4, 82.2, 80.3, 78.7, 65.5, 64.4, 52.1, 45.0, 43.2, 27.6, 20.5, 14.1, 11.1, 8.8; IR (thin film) 3011, 2922, 1737, 1454, 1279, 996, 759, 698 cm<sup>-1</sup>; HRMS (ESI) *m/z* calcd for C<sub>31</sub>H<sub>38</sub>NO<sub>6</sub> [M + H]<sup>+</sup>: 520.2694, found: 520.2713.

## 6. Synthesis of compounds 7

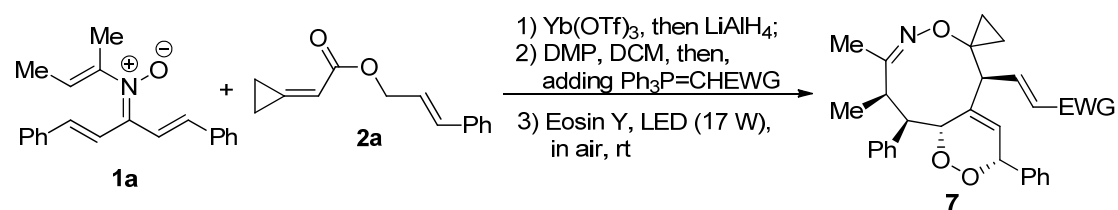

**General procedure C:** In a 25 mL round-bottom flask was charged with *N*-vinyl nitrone **1a** (0.2 mmol, 0.061 g), Yb(OTf)<sub>3</sub> (20 mol%, 0.04 mmol, 0.025 g) and TBME (2.0 mL) under an air atmosphere. And then, methylenecyclopropane **2a** (0.4 mmol, 2.0 equiv., 0.086 g) was added in one portion at room temperature. The mixture was stirred vigorously at room temperature for 36–48 h until nitrone **1a** was consumed completely (monitored by TLC). At this time, LiAlH<sub>4</sub> (0.4 mmol, 2.0 equiv. 0.030 g) was added at 0 °C. Then, the reaction mixture was stirred vigorously at 0 °C for 0.5 h until substrate disappeared (monitored by TLC). At this time, the reaction was quenched with H<sub>2</sub>O (10 mL) and exacted with Et<sub>2</sub>O (20 mL). The combined organic layers were washed with brine (10 mL), dried over Na<sub>2</sub>SO<sub>4</sub>, and filtered. The solvents were removed under the reduced pressure. The crude product was used directly in the next step.

In a round-bottom flask was charged with the above alcohol and CH<sub>2</sub>Cl<sub>2</sub> (2 mL). Dess-Martin Periodinane (DMP) (2.5 equiv., 0.5 mmol, 0.212 g) was added at room temperature. The resulting mixture was stirred at room temperature for 2 h until the substrate disappeared (monitored by TLC). Then Ph<sub>3</sub>P=CH EWG (2 equiv., 0.4 mmol) was added at room temperature. The resulting mixture was stirred at room temperature for 1-2 h until the substrate disappeared (monitored by TLC). The solvents were removed under the reduced pressure and the crude product was used directly in the next step.

An oven-dried glass vial equipped with a magnetic stirrer was charged with the above crude olefin product, Eosin Y (5 mol%, 0.01 mmol, 0.006 g) and TBME (2 mL). The vial was closed with a plastic film. Then, the reaction mixture was stirred and irradiated (17 W white LED) at room temperature for 36–72 h until the olefin was

consumed completely (monitored by TLC). At this time, the solvent was removed under reduced pressure and the crude product was purified by flash column chromatography (the crude residue was dry loaded with silica gel, 1/20 to 1/10, ethyl acetate/petroleum ether) to provide compounds **7**.

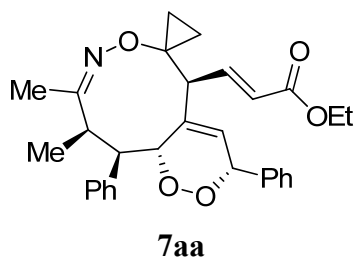

**Oxazonine-fused endoperoxide 7aa**, a light yellow solid, 0.051 g, 52% yield. Mp: 167–168 °C; <sup>1</sup>H NMR (400 MHz, CDCl<sub>3</sub>): δ 7.35 (d, *J* = 7.6 Hz, 2H), 7.29–7.18 (m, 6H), 7.01–6.99 (m, 2H), 6.47 (dd, *J* = 15.6 Hz, 10.0 Hz, 1H), 6.03 (d, *J* = 15.6 Hz, 1H), 5.83–5.78 (m, 1H), 5.55–5.50 (m, 1H), 5.47–5.45 (m, 1H), 4.19 (q, *J* = 6.8 Hz, 2H), 3.79 (d, *J* = 9.6 Hz, 1H), 3.38–3.37 (m, 1H), 2.77–2.72 (m, 1H), 1.96 (s, 3H), 1.52 (d, *J* = 7.2 Hz, 3H), 1.28 (t, *J* = 6.8 Hz, 3H), 1.13–1.05 (m, 2H), 0.89–0.73 (m, 2H); <sup>13</sup>C NMR (100 MHz, CDCl<sub>3</sub>): δ 172.1, 165.6, 143.2, 142.9, 139.1, 136.7, 129.3, 128.5, 128.3, 128.0, 127.9, 126.5, 126.4, 124.7, 80.0, 77.9, 64.1, 60.5, 51.6, 46.0, 45.6, 21.6, 14.1, 12.5, 10.7, 8.4; IR (thin film) 3033, 2929, 1720, 1455, 1262, 1026, 700 cm<sup>-1</sup>; HRMS (ESI) *m/z* calcd for C<sub>30</sub>H<sub>34</sub>NO<sub>5</sub> [M + H]<sup>+</sup>: 488.2431, found: 488.2434.

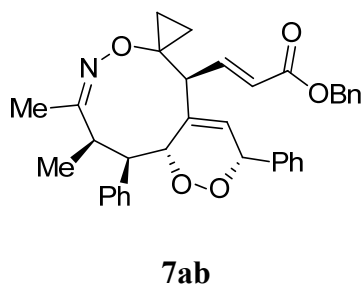

**Oxazonine-fused endoperoxide 7ab**, a light yellow solid, 0.078 g, 71% yield. Mp: 141–142 °C; <sup>1</sup>H NMR (400 MHz, CDCl<sub>3</sub>): δ 7.35–7.32 (m, 7H), 7.28–7.16 (m, 6H), 7.00–6.98 (m, 2H), 6.53 (dd, *J* = 15.6 Hz, 10.0 Hz, 1H), 6.09 (d, *J* = 15.6 Hz, 1H), 5.80–5.78 (m, 1H), 5.55–5.50 (m, 1H), 5.47–5.45 (m, 1H), 5.15 (s, 2H), 3.80–3.77 (m, 1H), 3.37–3.36 (m, 1H), 2.77–2.72 (m, 1H), 1.96 (s, 3H), 1.52 (d, *J* = 7.2 Hz, 3H),



1.14–1.05 (m, 2H), 0.79–0.71 (m, 2H);  $^{13}\text{C}$  NMR (100 MHz,  $\text{CDCl}_3$ ):  $\delta$  172.1, 165.4, 143.9, 142.8, 139.0, 136.6, 135.6, 129.3, 128.6, 128.5, 128.3, 128.2, 128.0, 127.9, 127.8, 126.4, 126.1, 124.8, 80.0, 77.9, 66.3, 64.0, 51.5, 45.9, 45.7, 21.6, 12.5, 10.8, 8.4; IR (thin film) 3031, 2917, 1719, 1454, 1252, 1018, 697  $\text{cm}^{-1}$ ; HRMS (ESI)  $m/z$  calcd for  $\text{C}_{35}\text{H}_{36}\text{NO}_5$   $[\text{M} + \text{H}]^+$ : 550.2588, found: 550.2602.

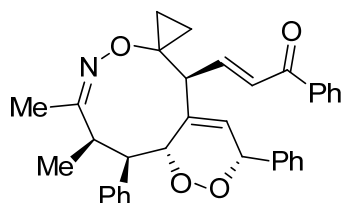

**7ac**

**Oxazonine-fused endoperoxide 7ac**, a light yellow solid, 0.073 g, 70% yield. Mp: 147–148  $^{\circ}\text{C}$ ;  $^1\text{H}$  NMR (400 MHz,  $\text{CDCl}_3$ ):  $\delta$  7.94 (d,  $J = 7.6$  Hz, 2H), 7.59 (t,  $J = 7.2$  Hz, 1H), 7.48 (t,  $J = 7.6$  Hz, 2H), 7.37–7.35 (m, 2H), 7.30 (d,  $J = 7.2$  Hz, 2H), 7.20–7.18 (m, 4H), 7.15 (d,  $J = 14.8$  Hz, 1H), 6.99–6.98 (m, 2H), 6.61 (dd,  $J = 15.2$  Hz, 10.0 Hz, 1H), 5.86–5.84 (m, 1H), 5.59–5.56 (m, 1H), 5.49–5.47 (m, 1H), 3.94 (d,  $J = 9.6$  Hz, 1H), 3.41–3.40 (m, 1H), 2.79–2.74 (m, 1H), 2.00 (s, 3H), 1.55 (d,  $J = 7.2$  Hz, 3H), 1.15–1.10 (m, 2H), 0.88–0.78 (m, 2H);  $^{13}\text{C}$  NMR (100 MHz,  $\text{CDCl}_3$ ):  $\delta$  189.2, 172.1, 143.2, 142.9, 139.1, 137.2, 136.7, 133.1, 130.1, 129.3, 128.7, 128.6, 128.5, 128.2, 127.9, 127.7, 126.4, 125.0, 80.0, 77.9, 64.2, 51.5, 46.1, 46.0, 21.7, 12.4, 10.8, 8.6; IR (thin film) 3063, 2921, 1671, 1454, 1259, 1015, 699  $\text{cm}^{-1}$ ; HRMS (ESI)  $m/z$  calcd for  $\text{C}_{34}\text{H}_{34}\text{NO}_4$   $[\text{M} + \text{H}]^+$ : 520.2482, found: 520.2500.

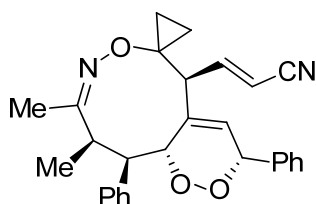

**7ad**

**Oxazonine-fused endoperoxide 7ad**, a light yellow solid, 0.051 g, 58% yield. Mp: 56–57  $^{\circ}\text{C}$ ;  $^1\text{H}$  NMR (400 MHz,  $\text{CDCl}_3$ ):  $\delta$  7.34–7.17 (m, 8H), 6.99–6.98 (m, 2H),

6.25 (dd,  $J = 16.4$  Hz, 9.6 Hz, 1H), 5.76–5.73 (m, 1H), 5.58 (d,  $J = 16.0$  Hz, 1H), 5.49–5.48 (m, 2H), 3.74 (d,  $J = 8.8$  Hz, 1H), 3.34–3.33 (m, 1H), 2.76–2.71 (m, 1H), 1.94 (s, 3H), 1.50 (d,  $J = 7.2$  Hz, 3H), 1.18–1.10 (m, 2H), 0.73–0.70 (m, 2H);  $^{13}\text{C}$  NMR (100 MHz,  $\text{CDCl}_3$ ):  $\delta$  172.5, 150.5, 142.6, 138.3, 136.2, 129.2, 128.7, 128.3, 127.9, 127.6, 126.5, 125.5, 116.4, 104.8, 79.8, 77.6, 63.6, 51.6, 47.2, 45.9, 21.5, 12.4, 10.6, 8.3; IR (thin film) 3012, 2925, 1736, 1454, 1261, 1019, 698  $\text{cm}^{-1}$ ; HRMS (ESI)  $m/z$  calcd for  $\text{C}_{28}\text{H}_{29}\text{N}_2\text{O}_3$   $[\text{M} + \text{H}]^+$ : 441.2173, found: 441.2186.

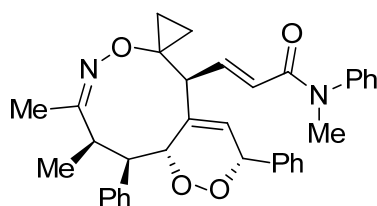

**7ae**

**Oxazonine-fused endoperoxide 7ae**, a white solid, 0.081 g, 74% yield. Mp: 75–76 °C;  $^1\text{H}$  NMR (400 MHz,  $\text{CDCl}_3$ ):  $\delta$  7.41–7.35 (m, 3H), 7.31–7.15 (m, 8H), 7.11 (d,  $J = 6.8$  Hz, 2H), 6.96–6.94 (m, 2H), 6.40 (dd,  $J = 15.2$  Hz, 9.6 Hz, 1H), 5.90 (d,  $J = 15.2$  Hz, 1H), 5.79–5.77 (m, 1H), 5.50–5.48 (m, 1H), 5.44–5.41 (m, 1H), 3.61–3.59 (m, 1H), 3.30 (s, 3H), 3.27–3.26 (m, 1H), 2.64–2.62 (m, 1H), 1.90 (s, 3H), 1.50 (d,  $J = 6.8$  Hz, 3H), 1.06–1.00 (m, 2H), 0.83–0.70 (m, 2H);  $^{13}\text{C}$  NMR (100 MHz,  $\text{CDCl}_3$ ):  $\delta$  171.7, 164.9, 143.3, 143.1, 140.4, 139.1, 136.9, 129.6, 129.2, 128.4, 128.2, 127.8, 127.7, 127.5, 127.3, 126.3, 126.2, 124.9, 79.9, 77.8, 64.0, 51.2, 46.3, 45.0, 37.5, 21.7, 12.2, 10.6, 8.4; IR (thin film) 3032, 2911, 1658, 1454, 1276, 1008, 697  $\text{cm}^{-1}$ ; HRMS (ESI)  $m/z$  calcd for  $\text{C}_{35}\text{H}_{37}\text{N}_2\text{O}_4$   $[\text{M} + \text{H}]^+$ : 549.2748, found: 549.2754.

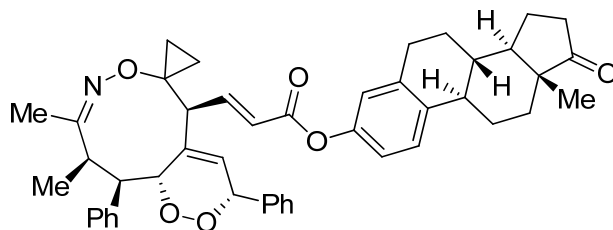

**7af**

**Oxazonine-fused endoperoxide 7af**, a light yellow solid, 0.082 g, 58% yield. Mp:

89–90 °C;  $^1\text{H}$  NMR (400 MHz,  $\text{CDCl}_3$ ):  $\delta$  7.36 (d,  $J = 7.2$  Hz, 2H), 7.30–7.17 (m, 7H), 7.04–7.03 (m, 2H), 6.87 (d,  $J = 7.6$  Hz, 1H), 6.83 (s, 1H), 6.68 (dd,  $J = 15.2$  Hz, 9.6 Hz, 1H), 6.24 (d,  $J = 15.2$  Hz, 1H), 5.83–5.77 (m, 1H), 5.60–5.57 (m, 1H), 5.50–5.48 (m, 1H), 3.86–3.84 (m, 1H), 3.42–3.41 (m, 1H), 2.90–2.88 (m, 2H), 2.82–2.77 (m, 1H), 2.53–2.47 (m, 1H), 2.41–2.38 (m, 1H), 2.30–2.25 (m, 1H), 2.16–2.01 (m, 3H), 1.97 (s, 3H), 1.64–1.56 (m, 5H), 1.53 (d,  $J = 6.8$  Hz, 3H), 1.48–1.44 (m, 2H), 1.19–1.09 (m, 2H), 0.90 (s, 3H), 0.82–0.80 (m, 2H);  $^{13}\text{C}$  NMR (100 MHz,  $\text{CDCl}_3$ ):  $\delta$  220.7, 172.3, 164.2, 148.3, 145.4, 142.8, 138.9, 137.9, 137.4, 136.6, 129.3, 128.6, 128.3, 128.0, 127.9, 126.4, 126.3, 125.7, 125.0, 121.4, 118.6, 80.0, 78.0, 64.1, 51.7, 50.3, 47.8, 46.1, 45.8, 44.1, 37.9, 35.8, 31.5, 29.3, 26.2, 25.7, 21.5, 21.4, 13.7, 12.6, 10.8, 8.5; IR (thin film) 3028, 2928, 1737, 1649, 1492, 1153, 1015, 698  $\text{cm}^{-1}$ ; HRMS (ESI)  $m/z$  calcd for  $\text{C}_{46}\text{H}_{50}\text{NO}_6$  [ $\text{M} + \text{H}$ ] $^+$ : 712.3633, found: 712.3650.

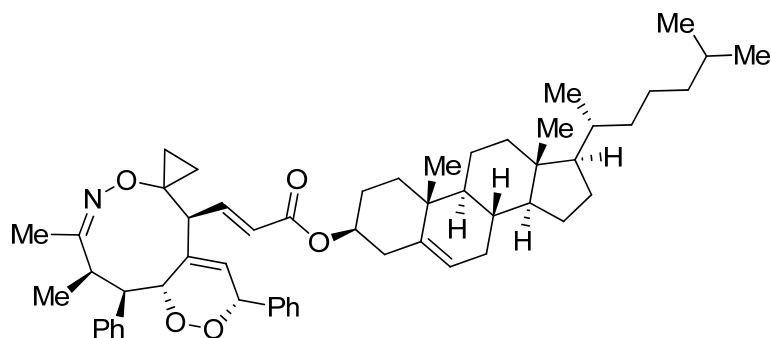

**7ag**

**Oxazonine-fused endoperoxide 7ag**, a light yellow solid, 0.052 g, 49% yield. Mp: 183–184 °C;  $^1\text{H}$  NMR (400 MHz,  $\text{CDCl}_3$ ):  $\delta$  7.34 (d,  $J = 7.2$  Hz, 2H), 7.28–7.16 (m, 6H), 7.01–6.99 (m, 2H), 6.46 (dd,  $J = 15.2$  Hz, 9.6 Hz, 1H), 6.02 (d,  $J = 15.6$  Hz, 1H), 5.80–5.78 (m, 1H), 5.56–5.53 (m, 1H), 5.47–5.45 (m, 1H), 5.38–5.35 (m, 1H), 4.85–4.62 (m, 1H), 3.78–3.75 (m, 1H), 3.38–3.37 (m, 1H), 2.77–2.75 (m, 1H), 2.32–2.30 (m, 2H), 2.02–1.98 (m, 2H), 1.95 (s, 3H), 1.87–1.83 (m, 3H), 1.61–1.56 (m, 5H), 1.52 (d,  $J = 7.2$  Hz, 3H), 1.46–1.32 (m, 7H), 1.12–1.08 (m, 11H), 1.01 (s, 3H), 0.92 (d,  $J = 6.0$  Hz, 3H), 0.87 (d,  $J = 6.4$  Hz, 6H), 0.78–0.75 (m, 2H), 0.67 (s, 3H);  $^{13}\text{C}$  NMR (100 MHz,  $\text{CDCl}_3$ ):  $\delta$  172.1, 165.0, 143.0, 142.8, 139.5, 139.0, 136.7, 129.3,

128.5, 128.2, 128.0, 127.9, 126.9, 126.4, 124.7, 122.7, 80.0, 77.9, 74.2, 64.1, 56.6, 56.0, 51.5, 49.9, 45.9, 45.7, 42.2, 39.6, 39.4, 38.0, 36.9, 36.5, 36.1, 35.7, 31.9, 31.8, 28.1, 27.9, 27.7, 24.2, 23.7, 22.7, 22.5, 21.5, 20.9, 19.2, 18.6, 12.5, 11.8, 10.8, 8.4; IR (thin film) 3032, 2937, 1709, 1455, 1270, 1018, 699  $\text{cm}^{-1}$ ; HRMS (ESI)  $m/z$  calcd for  $\text{C}_{55}\text{H}_{74}\text{NO}_5$   $[\text{M} + \text{H}]^+$ : 828.5562, found: 828.5549.

## 7. Gram scale preparation of **3aa**

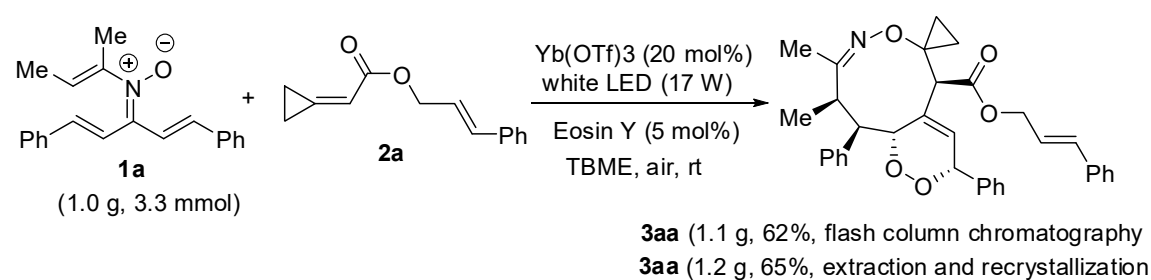

An oven-dried 100 mL round bottom flask equipped with a magnetic stirrer was charged with the corresponding *N*-vinyl nitron **1a** (1.0 g, 3.3 mmol),  $\text{Yb}(\text{OTf})_3$  (20 mol%, 0.66 mmol, 0.409 g), Eosin Y (5 mol%, 0.165 mmol, 0.099 g) and TBME (40 mL). Methylenecyclopropane **2a** (1.42 g, 6.6 mmol, 2.0 equiv.) was added to the mixture. The flask was closed with a plastic film. Then, the reaction mixture was stirred and irradiated (17 W white LED) at room temperature for 72 h (monitored by TLC). At this time, the solvent was removed under reduced pressure and the crude product was purified by flash column chromatography (the crude residue was dry loaded with silica gel, 1/20 to 1/10, ethyl acetate/petroleum ether) to afford endoperoxide **3aa** (1.1 g, 62% yield).

Alternatively, when the reaction was completed, the reaction was quenched with water (40 mL). Then, the water layer was extracted with  $\text{Et}_2\text{O}$  (3  $\times$  30 mL). The organic layers were combined and dried with  $\text{Na}_2\text{SO}_4$ . The mixture was then filtered and the solvent was removed under reduced pressure. The crude product was recrystallized with petroleum ether to afford endoperoxide **3aa** (1.2 g, 65% yield).

## 8. Synthesis of compounds 8-10 from 3aa

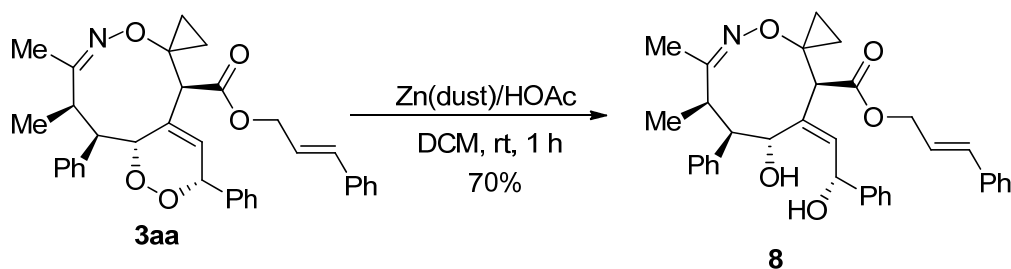

In a 25 mL round-bottom flask was charged with **3aa** (0.2 mmol), Zn dust (10 equiv., 2 mmol) under an air atmosphere. And then, CH<sub>2</sub>Cl<sub>2</sub> (2 mL) and HOAc (10 equiv., 2 mmol) was added at room temperature. The mixture was stirred vigorously at room temperature for 1 h until **3aa** was consumed completely (monitored by TLC). At this time, the reaction was diluted with H<sub>2</sub>O (10 mL) and extracted with CH<sub>2</sub>Cl<sub>2</sub> (20 mL). The combined organic layers were washed with brine (10 mL), dried over Na<sub>2</sub>SO<sub>4</sub>, and filtered. The solvent was removed under reduced pressure and the crude product was purified by flash column chromatography (the crude residue was dry loaded with silica gel, petroleum ether-EtOAc: 4/1) to provide compound **8** as a white solid (0.077 g, 70%). Mp: 146–147 °C; <sup>1</sup>H NMR (400 MHz, CDCl<sub>3</sub>): δ 7.39 (d, *J* = 7.6 Hz, 2H), 7.27–7.15 (m, 12H), 6.57 (d, *J* = 15.6 Hz, 1H), 6.13–6.06 (m, 1H), 5.95 (d, *J* = 8.8 Hz, 1H), 5.75 (d, *J* = 8.8 Hz, 1H), 4.94 (d, *J* = 11.2 Hz, 1H), 4.67–4.51 (m, 2H), 4.03 (s, 1H), 3.87–3.86 (m, 1H), 3.54–3.50 (m, 1H), 3.26–3.23 (m, 1H), 2.95 (brs, 1H), 1.74–1.70 (m, 1H), 1.24 (s, 3H), 1.16–1.11 (m, 1H), 0.91–0.87 (m, 1H), 0.83 (d, *J* = 7.2 Hz, 3H), 0.70–0.64 (m, 1H); <sup>13</sup>C NMR (100 MHz, CDCl<sub>3</sub>): δ 172.0, 170.6, 143.7, 141.0, 138.8, 135.8, 135.7, 135.6, 129.2, 128.6, 128.4, 128.3, 128.1, 127.3, 127.0, 126.6, 125.7, 121.6, 71.0, 69.9, 65.9, 62.3, 59.7, 55.1, 34.1, 18.7, 15.7, 10.2, 9.9; IR (thin film) 3480, 3030, 2921, 1708, 1494, 1169, 1021, 699 cm<sup>-1</sup>; HRMS (ESI) *m/z* calcd for C<sub>35</sub>H<sub>38</sub>NO<sub>5</sub> [M + H]<sup>+</sup>: 552.2744, found: 552.2763.

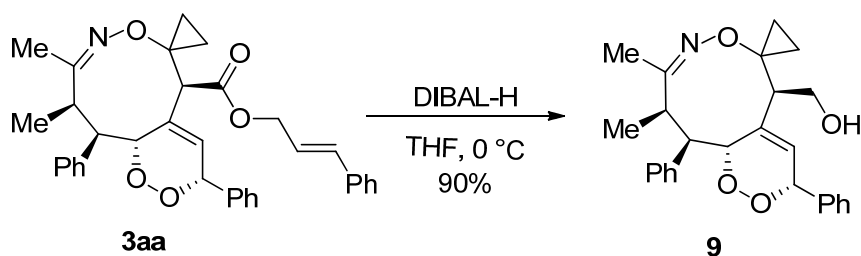

In a 25 mL round-bottom flask was charged with **3aa** (0.2 mmol) and THF (2 mL). DIBAL-H (0.4 mmol, 2.0 equiv., 1M) was added at 0 °C. Then, the reaction mixture was stirred vigorously at 0 °C for 0.5 h until **3aa** was consumed completely (monitored by TLC). At this time, the reaction was quenched with H<sub>2</sub>O (10 mL) and exacted with Et<sub>2</sub>O (20 mL). The combined organic layers were washed with brine (10 mL), dried over Na<sub>2</sub>SO<sub>4</sub>, and filtered. The solvents were removed under the reduced pressure. The crude product was purified by flash chromatography (the crude residue was dry loaded with silica gel, petroleum ether-EtOAc: 4/1) to give alcohol **9** as a light yellow oil (0.075 g, 90%). <sup>1</sup>H NMR (400 MHz, CDCl<sub>3</sub>): δ 7.33–7.24 (m, 7H), 7.20–7.12 (m, 3H), 5.81–5.79 (m, 1H), 5.58–5.57 (m, 2H), 3.99–3.83 (m, 2H), 3.56–3.55 (m, 1H), 3.14–3.12 (m, 1H), 2.66–2.64 (m, 1H), 1.81 (s, 3H), 1.42 (d, *J* = 7.2 Hz, 3H), 1.15–1.13 (m, 2H), 0.88–0.75 (m, 2H); <sup>13</sup>C NMR (100 MHz, CDCl<sub>3</sub>): δ 174.1, 142.6, 137.8, 136.5, 129.4, 128.7, 128.4, 128.2, 127.9, 126.5, 125.3, 80.4, 79.1, 64.6, 62.0, 52.2, 48.9, 43.5, 20.5, 14.4, 10.8, 8.6; IR (thin film) 3420, 3031, 2937, 1496, 1161, 1002, 697 cm<sup>-1</sup>; HRMS (ESI) *m/z* calcd for C<sub>26</sub>H<sub>30</sub>NO<sub>4</sub> [M + H]<sup>+</sup>: 420.2169, found: 420.2182.

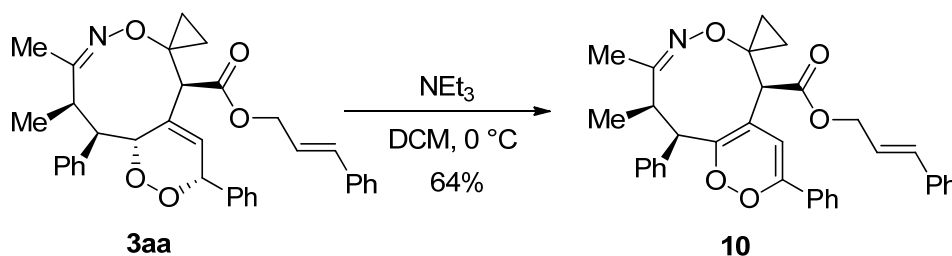

To a solution of **3aa** (0.2 mmol) in CH<sub>2</sub>Cl<sub>2</sub> (2 mL) at 0 °C was added NEt<sub>3</sub> (2 equiv., 0.4 mmol). Then, the reaction mixture was stirred vigorously at 0 °C for 10 h until **3aa** was consumed completely (monitored by TLC). The resulting mixture was allowed to warm to room temperature and SiO<sub>2</sub> was added stirring for 2 h. The solvents were removed under the reduced pressure. The crude product was purified by flash chromatography (the crude residue was dry loaded with silica gel, petroleum ether-EtOAc: 10/1) to give compound **10** as a white solid (0.070 g, 64%). Mp: 146–147 °C; <sup>1</sup>H NMR (400 MHz, CDCl<sub>3</sub>): δ 7.57–7.52 (m, 4H), 7.41–7.37 (m, 4H),

7.33–7.23 (m, 5H), 7.22–7.16 (m, 2H), 7.02 (s, 1H), 6.70 (d,  $J = 16.0$  Hz, 1H), 6.32 (dt,  $J = 15.6$  Hz, 6.8 Hz, 1H), 4.81–4.70 (m, 2H), 4.26 (s, 1H), 4.23–4.22 (m, 1H), 3.00–2.95 (m, 1H), 1.98 (s, 3H), 1.38 (d,  $J = 7.2$  Hz, 3H), 1.33–1.25 (m, 2H), 0.95–0.87 (m, 2H);  $^{13}\text{C}$  NMR (100 MHz,  $\text{CDCl}_3$ ):  $\delta$  170.0, 169.5, 151.9, 150.8, 141.9, 135.9, 135.1, 130.9, 128.6, 128.5, 128.4, 128.3, 128.2, 127.0, 126.9, 126.6, 123.4, 122.4, 119.7, 105.8, 65.5, 65.4, 47.3, 45.8, 43.7, 22.4, 14.6, 11.0, 9.9; IR (thin film) 3022, 2924, 1730, 1480, 1125, 697  $\text{cm}^{-1}$ ; HRMS (ESI)  $m/z$  calcd for  $\text{C}_{35}\text{H}_{34}\text{NO}_5$  [ $\text{M} + \text{H}$ ] $^+$ : 548.2431, found: 548.2455.

### 9. Asymmetric synthesis of endoperoxide **9** by chiral auxiliary.

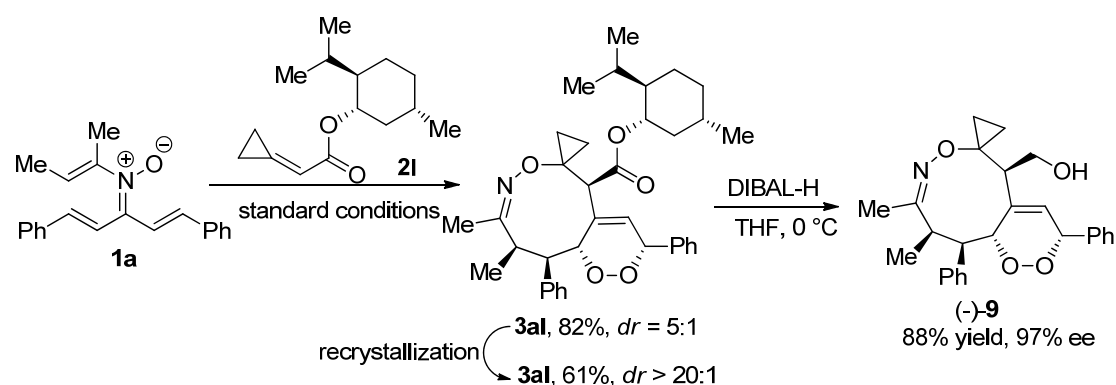

An oven-dried glass vial equipped with a magnetic stirrer was charged with the corresponding *N*-vinyl nitron **1a** (0.2 mmol, 0.061 g),  $\text{Yb}(\text{OTf})_3$  (20 mol%, 0.04 mmol, 0.025 g), Eosin Y (5 mol%, 0.01 mmol, 0.006 g) and TBME (2 mL). Methylene cyclopropane **2I** (0.4 mmol, 2.0 equiv., 0.094 g) was added to the vial. The vial was closed with a plastic film. Then, the reaction mixture was stirred and irradiated (17 W white LED) at room temperature for 72 h until *N*-vinyl nitron **1a** was consumed completely (monitored by TLC). At this time, the solvent was removed under reduced pressure and the crude product was purified by flash column chromatography (the crude residue was dry loaded with silica gel, 1/20, ethyl acetate/petroleum ether) to afford endoperoxide **3aI** ( $dr = 5:1$ ). A light yellow solid, (0.094 g, 82% yield).

Then, **3al** (*dr* = 5:1) was further recrystallized with petroleum ether to afford **3al** (61% yield, *dr* >20:1). *Major isomer*: Mp: 131–132 °C; <sup>1</sup>H NMR (400 MHz, CDCl<sub>3</sub>): δ 7.38 (d, *J* = 7.6 Hz, 2H), 7.28–7.16 (m, 6H), 7.02–7.01 (m, 2H), 5.83–5.80 (m, 1H), 5.64–5.63 (m, 1H), 5.49–5.48 (m, 1H), 4.71–4.64 (m, 1H), 3.92 (s, 1H), 3.37–3.36 (m, 1H), 2.78–2.72 (m, 1H), 1.94 (s, 3H), 1.93–1.92 (m, 1H), 1.72–1.59 (m, 3H), 1.51 (d, *J* = 7.2 Hz, 3H), 1.41–1.28 (m, 3H), 1.17–1.12 (m, 1H), 1.05–0.98 (m, 2H), 0.90 (d, *J* = 7.2 Hz, 3H), 0.82–0.79 (m, 3H), 0.75 (d, *J* = 6.4 Hz, 3H), 0.71 (d, *J* = 6.8 Hz, 3H); <sup>13</sup>C NMR (100 MHz, CDCl<sub>3</sub>): δ 172.2, 169.3, 143.0, 136.4, 135.6, 129.3, 128.5, 128.2, 127.9, 127.8, 126.4, 125.0, 79.8, 77.7, 74.9, 62.6, 50.7, 49.9, 46.7, 46.0, 40.6, 34.0, 31.2, 25.7, 22.9, 21.8, 21.7, 20.8, 15.7, 12.5, 10.9, 9.5; IR (thin film) 3021, 2981, 1730, 1451, 1222, 1054, 670 cm<sup>-1</sup>; HRMS (ESI) *m/z* calcd for C<sub>36</sub>H<sub>46</sub>NO<sub>5</sub> [M + H]<sup>+</sup>: 572.3371, found: 572.3388.

In a 25 mL round-bottom flask was charged with **3al** (*dr* >20:1) (0.2 mmol) and THF (2 mL). DIBAL-H (0.4 mmol, 2.0 equiv., 1M) was added at 0 °C. Then, the reaction mixture was stirred vigorously at 0 °C for 0.5 h until **3al** was consumed completely (monitored by TLC). At this time, the reaction was quenched with H<sub>2</sub>O (10 mL) and extracted with Et<sub>2</sub>O (20 mL). The combined organic layers were washed with brine (10 mL), dried over Na<sub>2</sub>SO<sub>4</sub>, and filtered. The solvents were removed under the reduced pressure. The crude product was purified by flash chromatography (the crude residue was dry loaded with silica gel, petroleum ether-EtOAc: 4/1) to give alcohol **9** as a light yellow oil (0.074 g, 88%). The characteristic data matched with above racemic-**9**. The enantiomeric excess (ee) values of **9** were determined by chiral HPLC analysis. Ee = 97%, conditions: AD-H, hexane/*i*-PrOH = 65/35, flow rate 0.8 mL/min, λ = 254 nm, t (major) = 11.5 min, t (minor) = 6.4 min. [α]<sub>D</sub><sup>20</sup> = -315.0 (*c* 0.125, CH<sub>2</sub>Cl<sub>2</sub>).



## 10. Asymmetric synthesis of **3aa** by PyBox

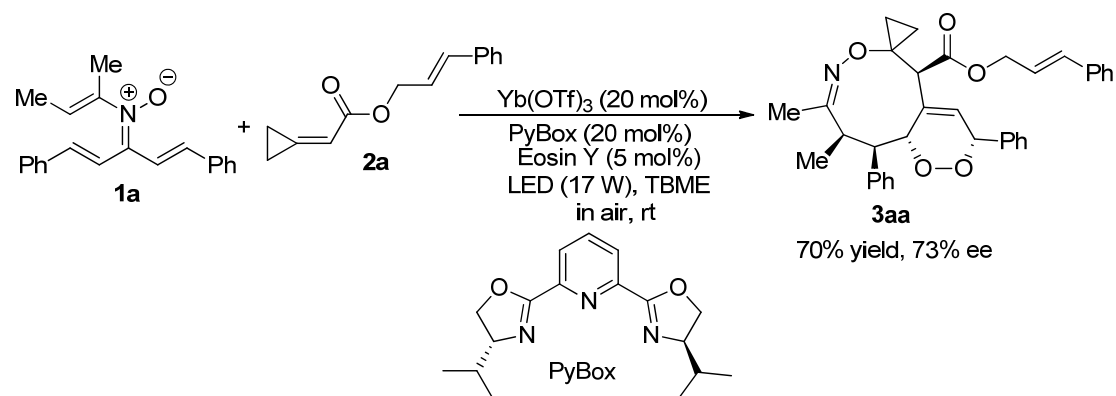

An oven-dried glass vial equipped with a magnetic stirrer was charged with *N*-vinyl nitronium salt **1a** (0.2 mmol, 0.061 g), methylenecyclopropane **2a** (0.4 mmol, 2 equiv., 0.086 g)  $\text{Yb}(\text{OTf})_3$  (20 mol %, 0.025 g) and PyBox (20 mol %, 0.012 g), Eosin Y (5 mol%, 0.01 mmol, 0.006 g) and TBME (2 mL). The vial was closed with a plastic film. Then, the reaction mixture was stirred and irradiated (17 W white LED) at room temperature for 3 days until the mixture was consumed completely (monitored by TLC). At this time, the solvent was removed under reduced pressure and the crude product was purified by flash column chromatography (the crude residue was dry loaded with silica gel, petroleum ether-EtOAc: 10/1) to provide endoperoxide **3aa** as a light yellow solid (0.078 g, 70%). The characteristic data matched with above racemic-**3aa**. The enantiomeric excess (ee) values of **3aa** were determined by chiral HPLC analysis. Ee = 73%, conditions: AD-H, hexane/*i*-PrOH = 90/10, flow rate 1.0 mL/min,  $\lambda$  = 254 nm, t (major) = 20.6 min, t (minor) = 24.6 min.

## 11. Biological activity studies of endoperoxides **3**, **4**, **6**

**Cell Culture:** Murine monocyte-macrophage RAW264.7 cells maintained in DMEM (Gibco, USA) incubated at 37 °C in a humidified atmosphere containing 5%  $\text{CO}_2$ . Mouse peritoneal macrophages purchased from Procell Life Science & Technology Co., Ltd.

**Cell viability assay:** Cell cytotoxicity was evaluated by MTT. The MTT solution was added into each well and after incubation at 37 °C for 4 h, the culture media

containing MTT were removed, and then DMSO was added into each well and the absorbance at 570 nm was measured by a microplate reader<sup>[5]</sup>.

**Assay for NO production** NO production was quantified by nitrite accumulation in the culture medium using the Griess reaction. Briefly, RAW264.7 cells were pretreated with compounds for 1 h, and then stimulated with or without LPS (1 mg/mL) for 24 h. The isolated supernatants were mixed with an equal volume of Griess reagent (Beyotime Biotechnology, China). NaNO<sub>2</sub> was used to generate a standard curve, and nitrite production was determined by measuring the optical density at 540 nm by a microplate reader<sup>[5]</sup>.

**Table S1.** The effects of the target compounds on the cell viability of RAW 264.7 at the concentration of 100  $\mu$ M (the MTT assay)

| Compounds       | Cell survival (% of normal) | Compounds          | Cell survival (% of normal) |
|-----------------|-----------------------------|--------------------|-----------------------------|
| <i>cis</i> -3aa | 45±0.02                     | <i>cis</i> -3ah    | 39±0.08                     |
| <i>cis</i> -3ba | 94±0.03                     | <i>cis</i> -6aa    | 64±0.04                     |
| <i>cis</i> -3ca | 32±0.05                     | <i>cis</i> -4aa    | 91±0.42                     |
| <i>cis</i> -3ha | 62±0.02                     | <i>trans</i> -4aa  | 86±0.35                     |
| <i>cis</i> -3ja | 58±0.09                     | <i>trans</i> -3aa  | 75±0.25                     |
| <i>cis</i> -3ac | 59±0.03                     | <i>cis</i> -4ba    | 74±0.18                     |
|                 |                             | <b>Indometacin</b> | 70±0.07                     |

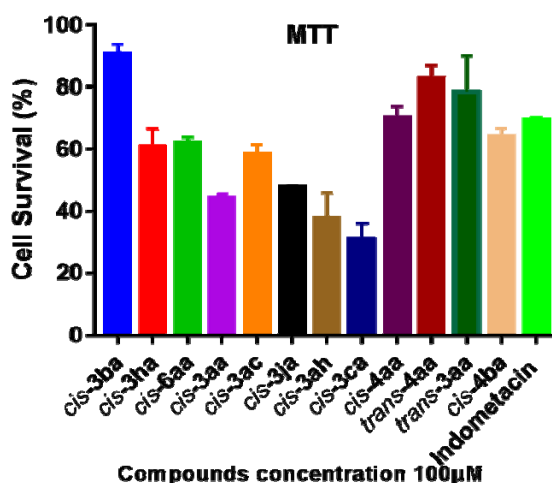

The Effect of the compounds *cis-3ba*, *cis-3ha*, *cis-6aa* on the inhibition of NO produced by RAW 264.7 cells induced by LPS. In the 6.25  $\mu$ M compound concentration, LPS concentration (1  $\mu$ g/mL).

**Table S2** The effect of compounds *cis-3ba*, *cis-3ha*, *cis-6aa* on LPS-induced NO production.

| Compounds      | Concentration of NO ( $\mu$ mol/L) | Compounds      | Concentration of NO ( $\mu$ mol/L) |
|----------------|------------------------------------|----------------|------------------------------------|
| con            | 0.38 $\pm$ 0.07                    | <i>cis-3ha</i> | 3.07 $\pm$ 0.99                    |
| LPS            | 9.16 $\pm$ 0.26                    | <i>cis-6aa</i> | 8.27 $\pm$ 0.69                    |
| <i>cis-3ba</i> | 3.25 $\pm$ 1.03                    | Indometacin    | 3.51 $\pm$ 1.30                    |

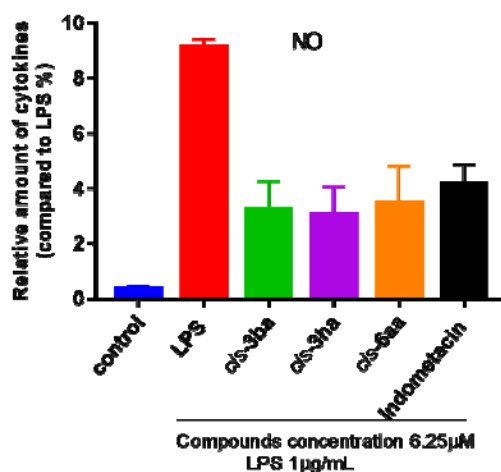

## 12. References

- [1] (a) N. Zou, J.-W. Jiao, Y. Feng, C.-H. Chen, C. Liang, G.-F. Su, D.-L. Mo, *Adv. Synth. Catal.* **2017**, 359, 3545. (b) C.-H. Chen, Q.-Y. Wu, C. Wei, C. Liang, G.-F. Su, D.-L. Mo, *Green Chem.* **2018**, 20, 2722.
- [2] X.-P. Ma, J.-F. Zhu, S.-Y. Wu, C.-H. Chen, N. Zou, C. Liang, G.-F. Su, D.-L. Mo, *J. Org. Chem.* **2017**, 82, 502.
- [3] X. P. Ma, C.-M. Nong, J. Zhao, X. Lu, C. Liang, D.-L. Mo, *Adv. Synth. Catal.* **2020**, 362, 478.
- [4] G. Li, Q. Yan, X. Gong, X. Dou, D. Yang, *ACS Sustainable Chem. Eng.* **2019**, 7, 14009.
- [5] S. Y. Liu, P. Xu, X. L. Luo, J. F. Hu, X. H. Liu, *Neurochem. Res.* **2016**, 41, 1570.

**13. X-ray structure for compound *cis*-3aa.**

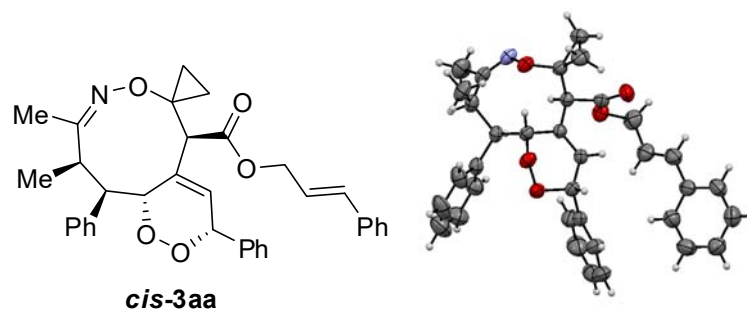

**Figure S1:** ORTEP diagram of *cis*-3aa at 50% ellipsoid probability

**14. NMR spectra for compounds 3, 5-10 and HPLC for 9 and 3aa**

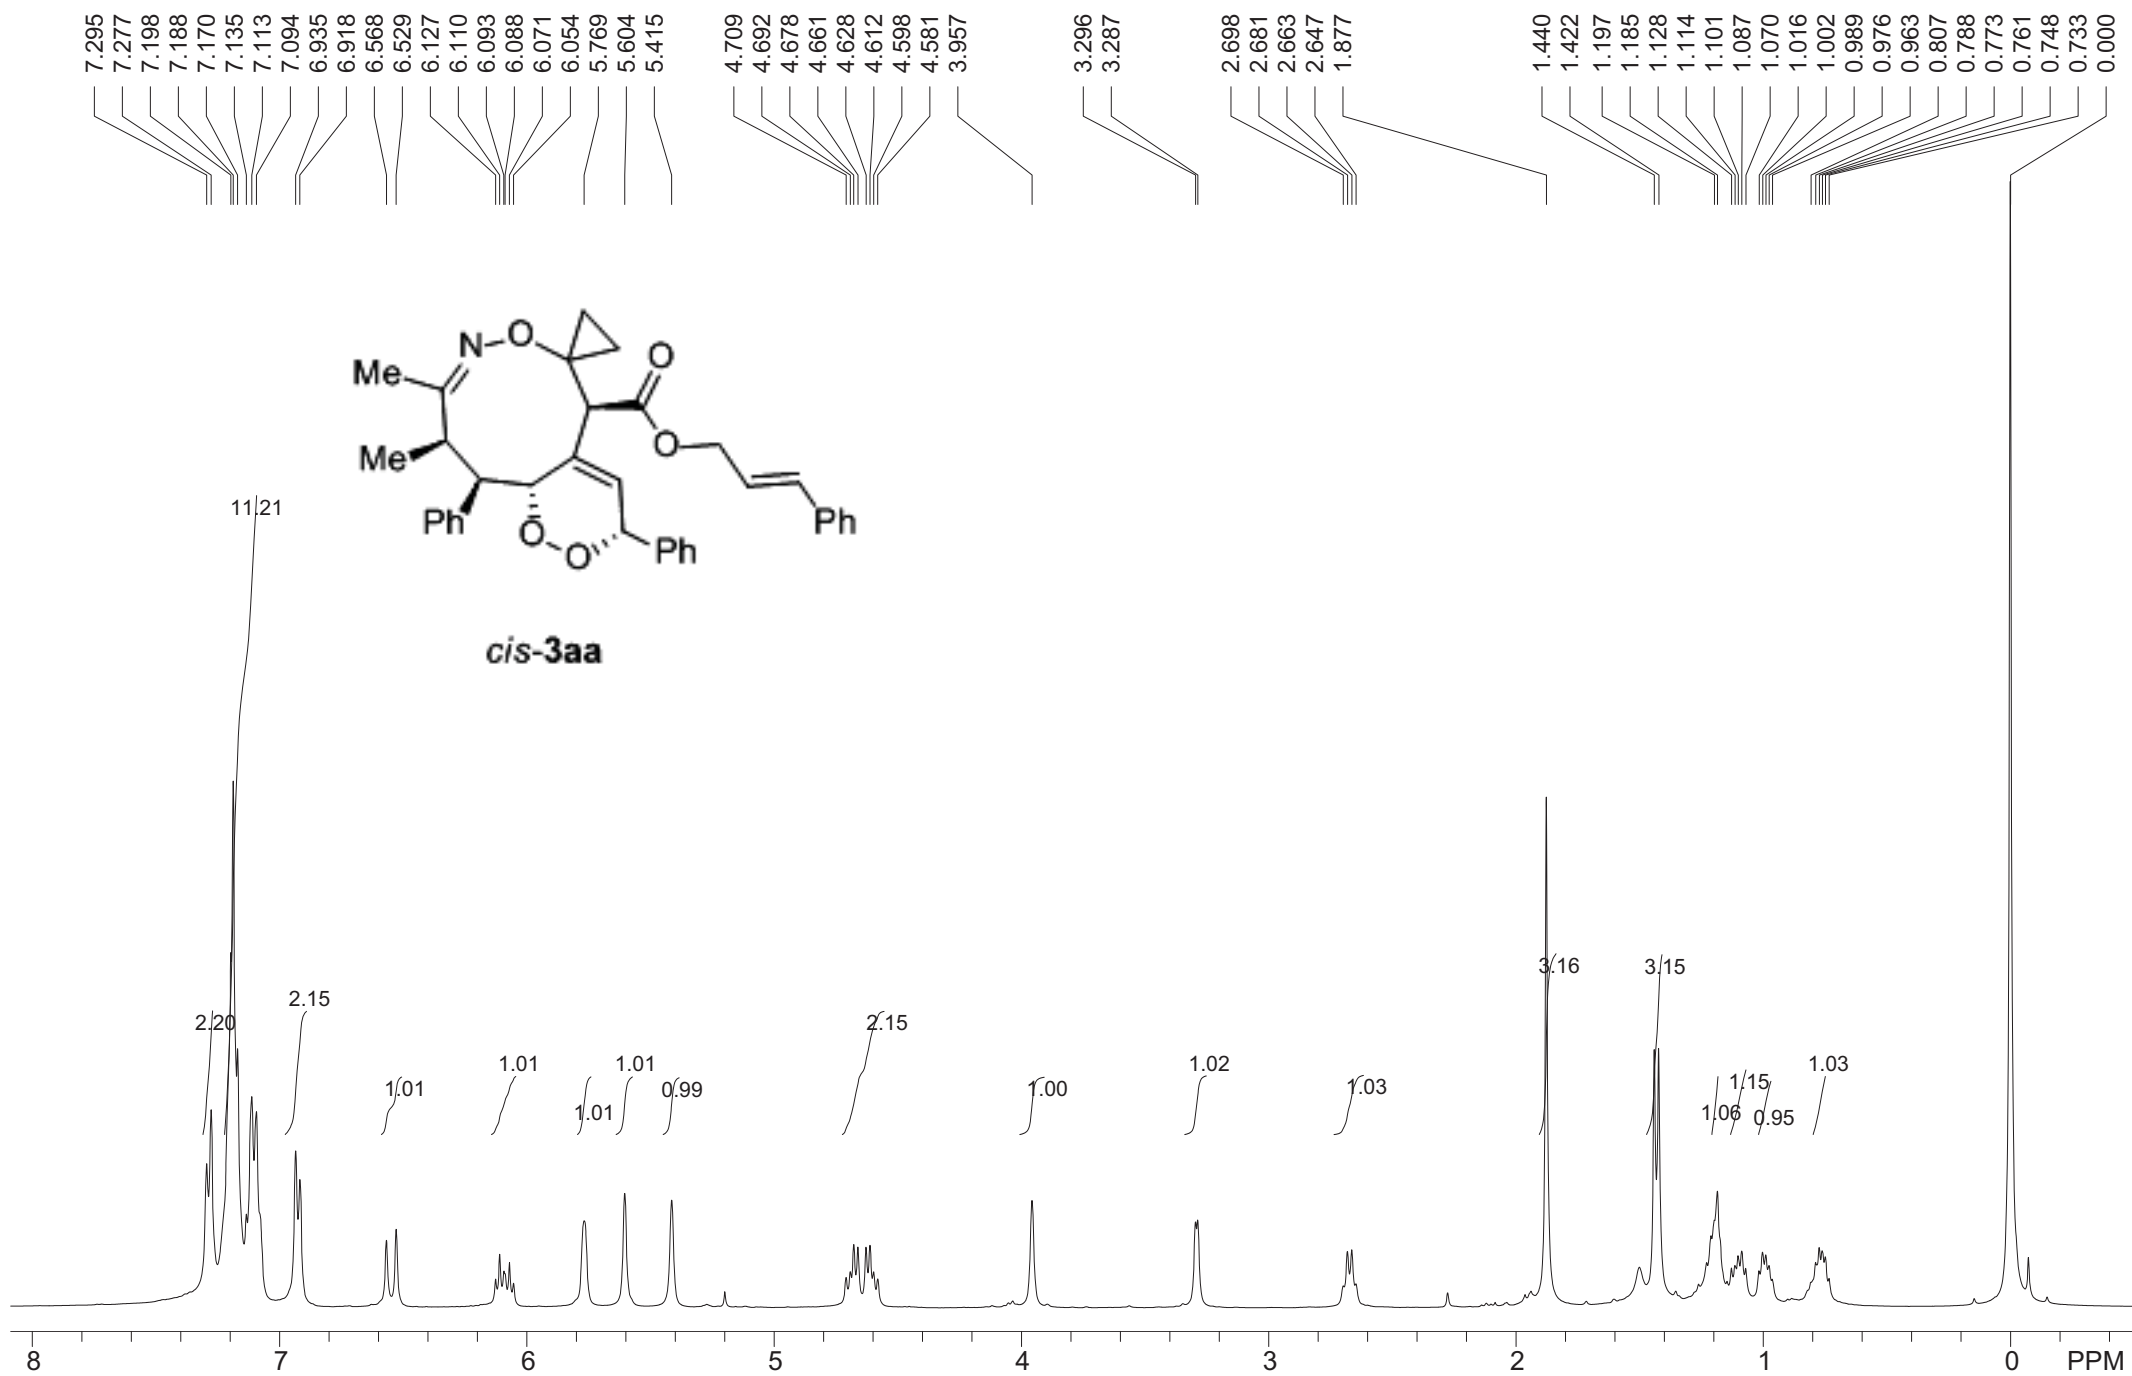

172.455  
169.451  
142.895  
136.471  
135.859  
135.472  
135.370  
129.362  
128.582  
128.290  
128.188  
127.940  
127.897  
126.606  
126.460  
124.965  
122.224

79.831  
77.549  
77.323  
77.009  
76.688

65.474  
62.849

50.855  
49.440  
46.064

21.732  
12.428  
11.262  
9.381

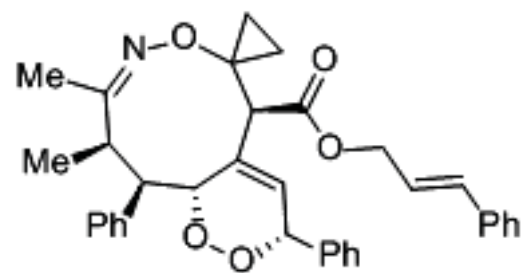

*cis-3aa*

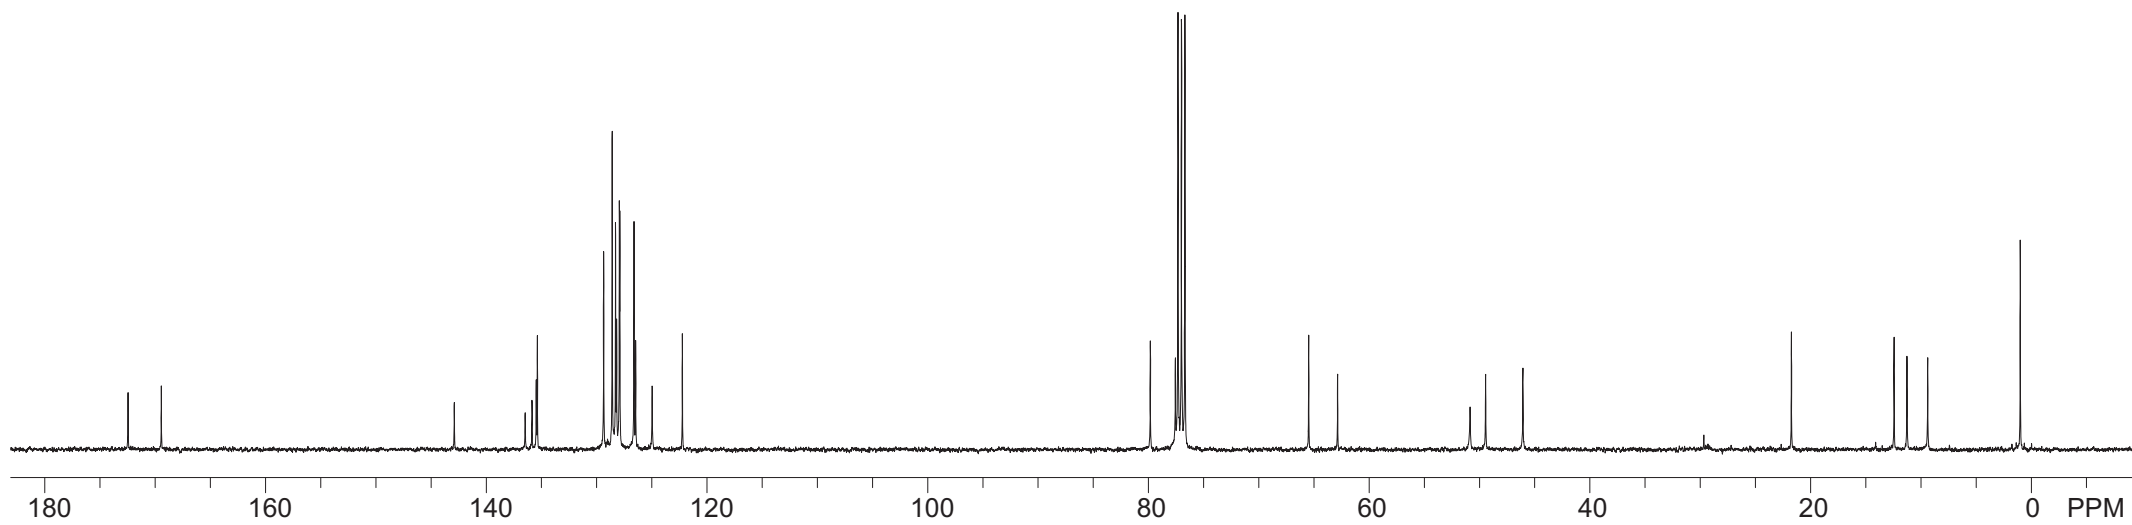

7.273  
7.264  
7.256  
6.989  
6.968  
6.801  
6.781  
6.721  
6.700  
6.649  
6.609  
6.215  
6.198  
6.181  
6.159  
6.142  
5.783  
5.657  
5.450

4.805  
4.788  
4.774  
4.757  
4.695  
4.680  
4.665  
4.648  
4.016

3.728

3.343  
3.334

2.775  
2.759  
2.741  
2.725

1.948  
1.476  
1.458  
1.299  
1.257  
1.189  
1.173  
1.160  
1.147  
1.134  
1.085  
1.071  
1.059  
1.046  
0.872  
0.857  
0.845  
0.832  
0.818  
0.000

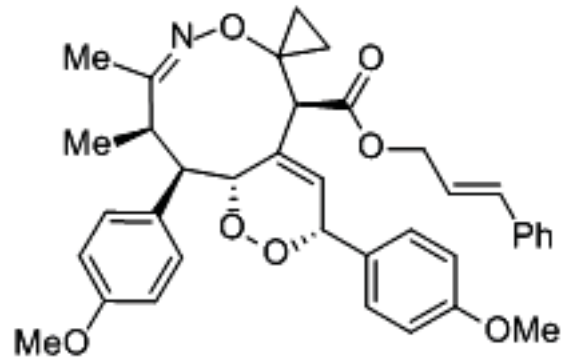

*cis-3ba*

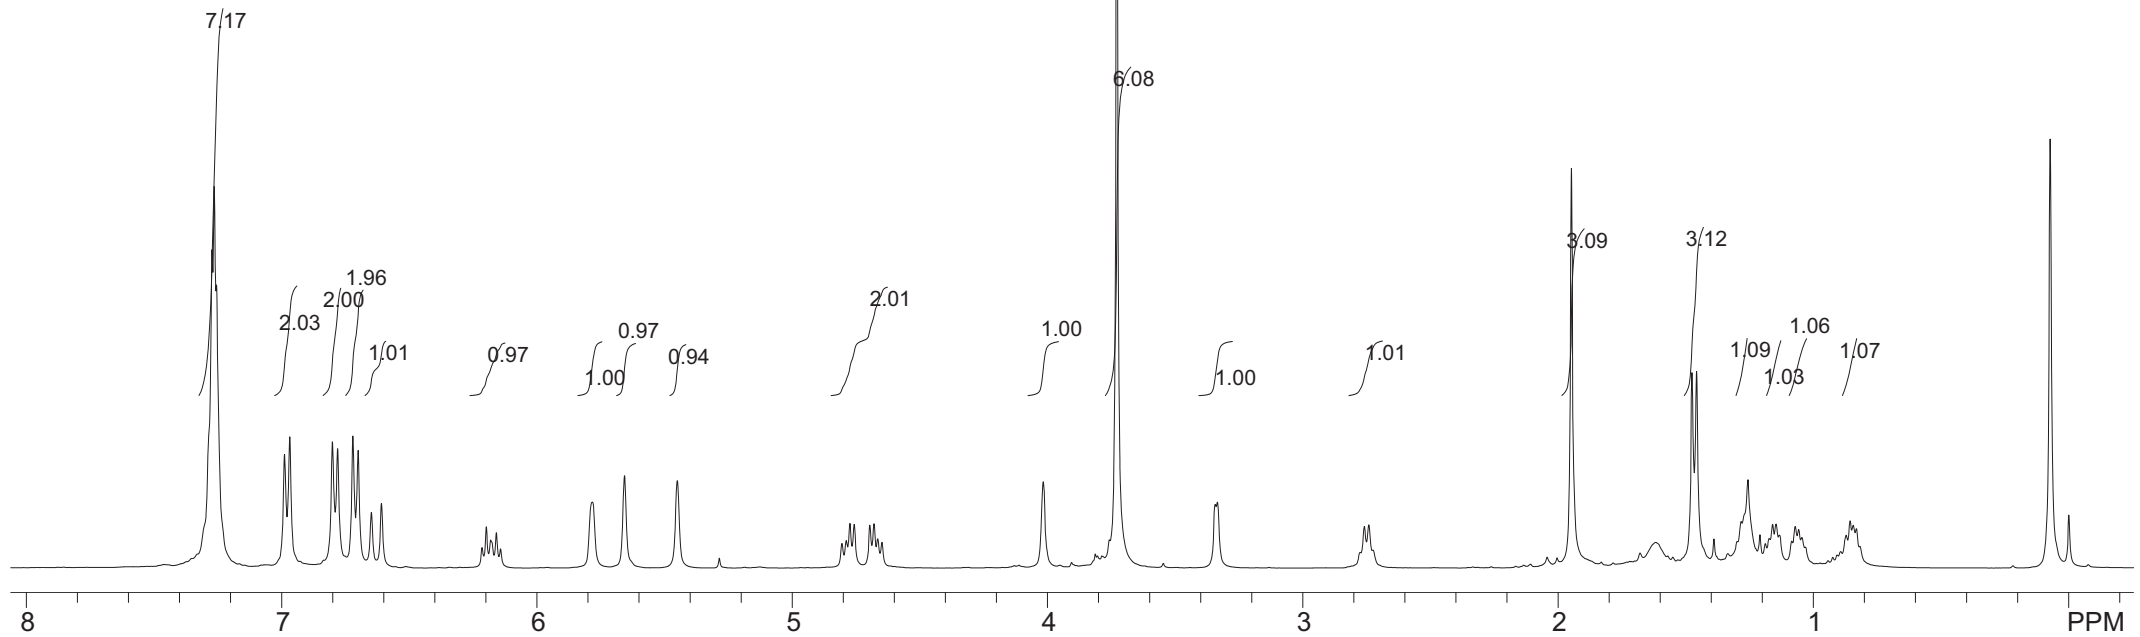

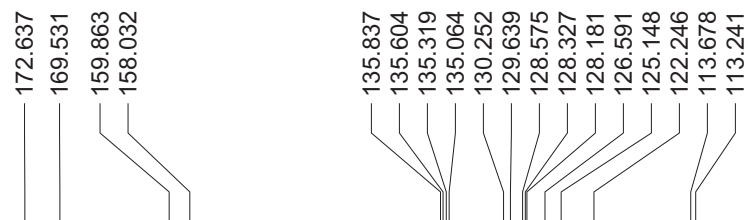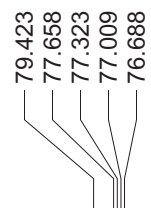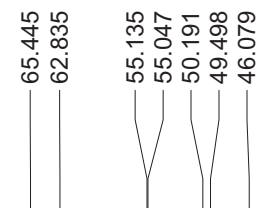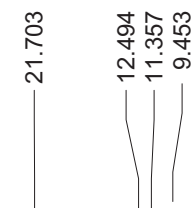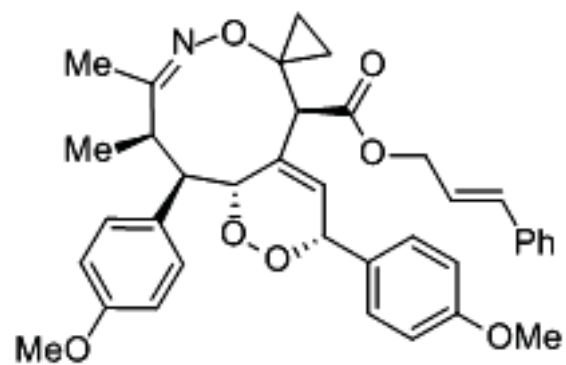

*cis-3ba*

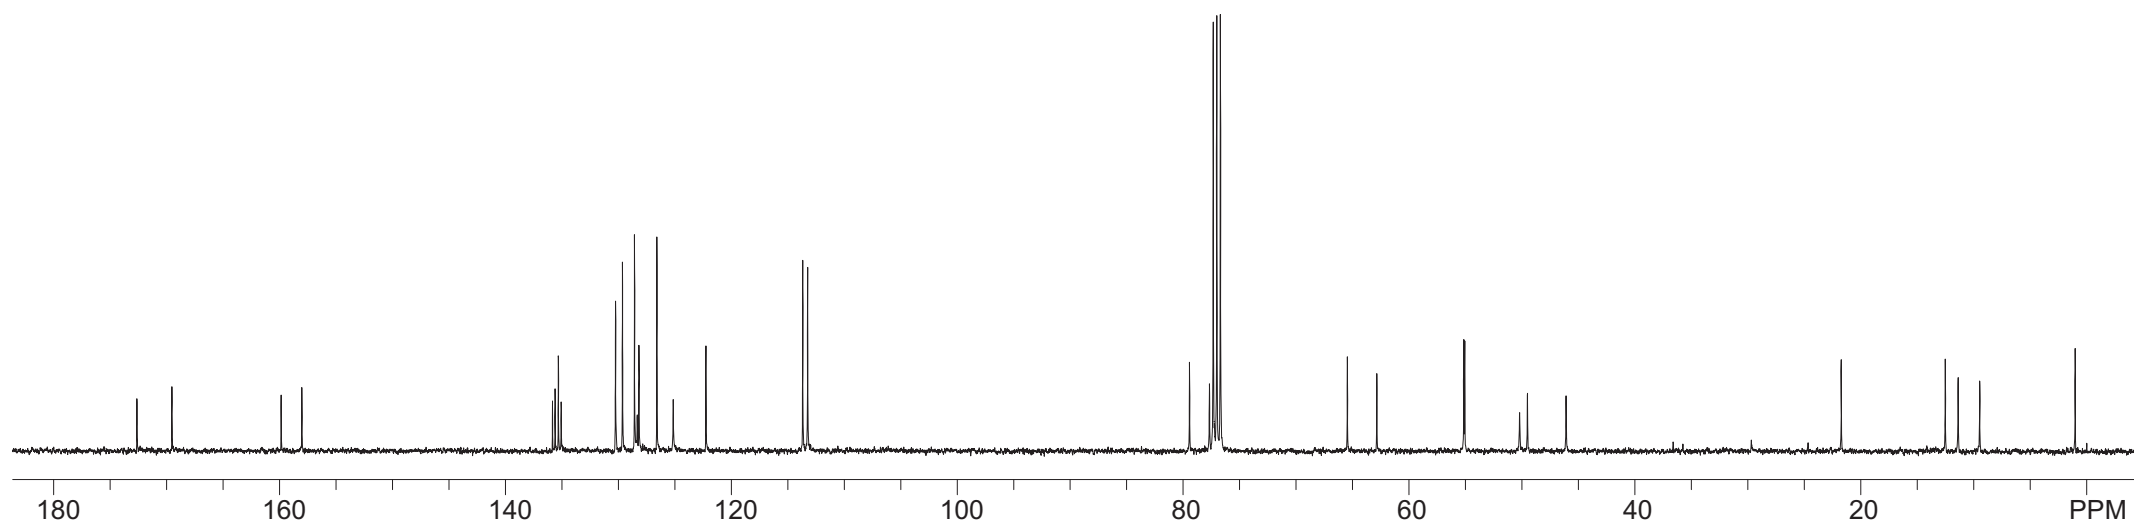



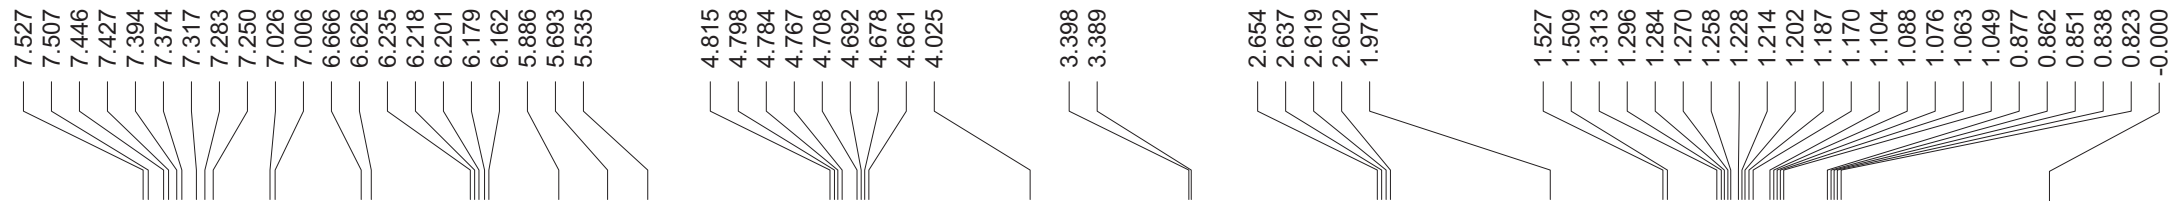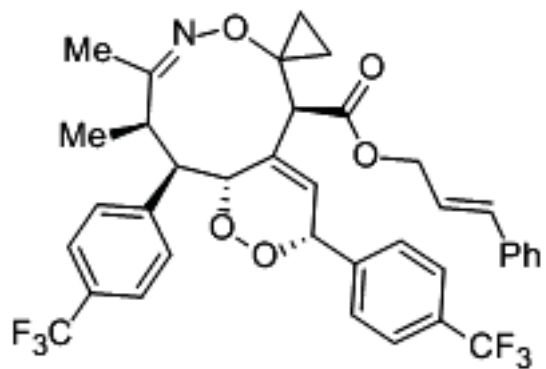

*cis-3ca*

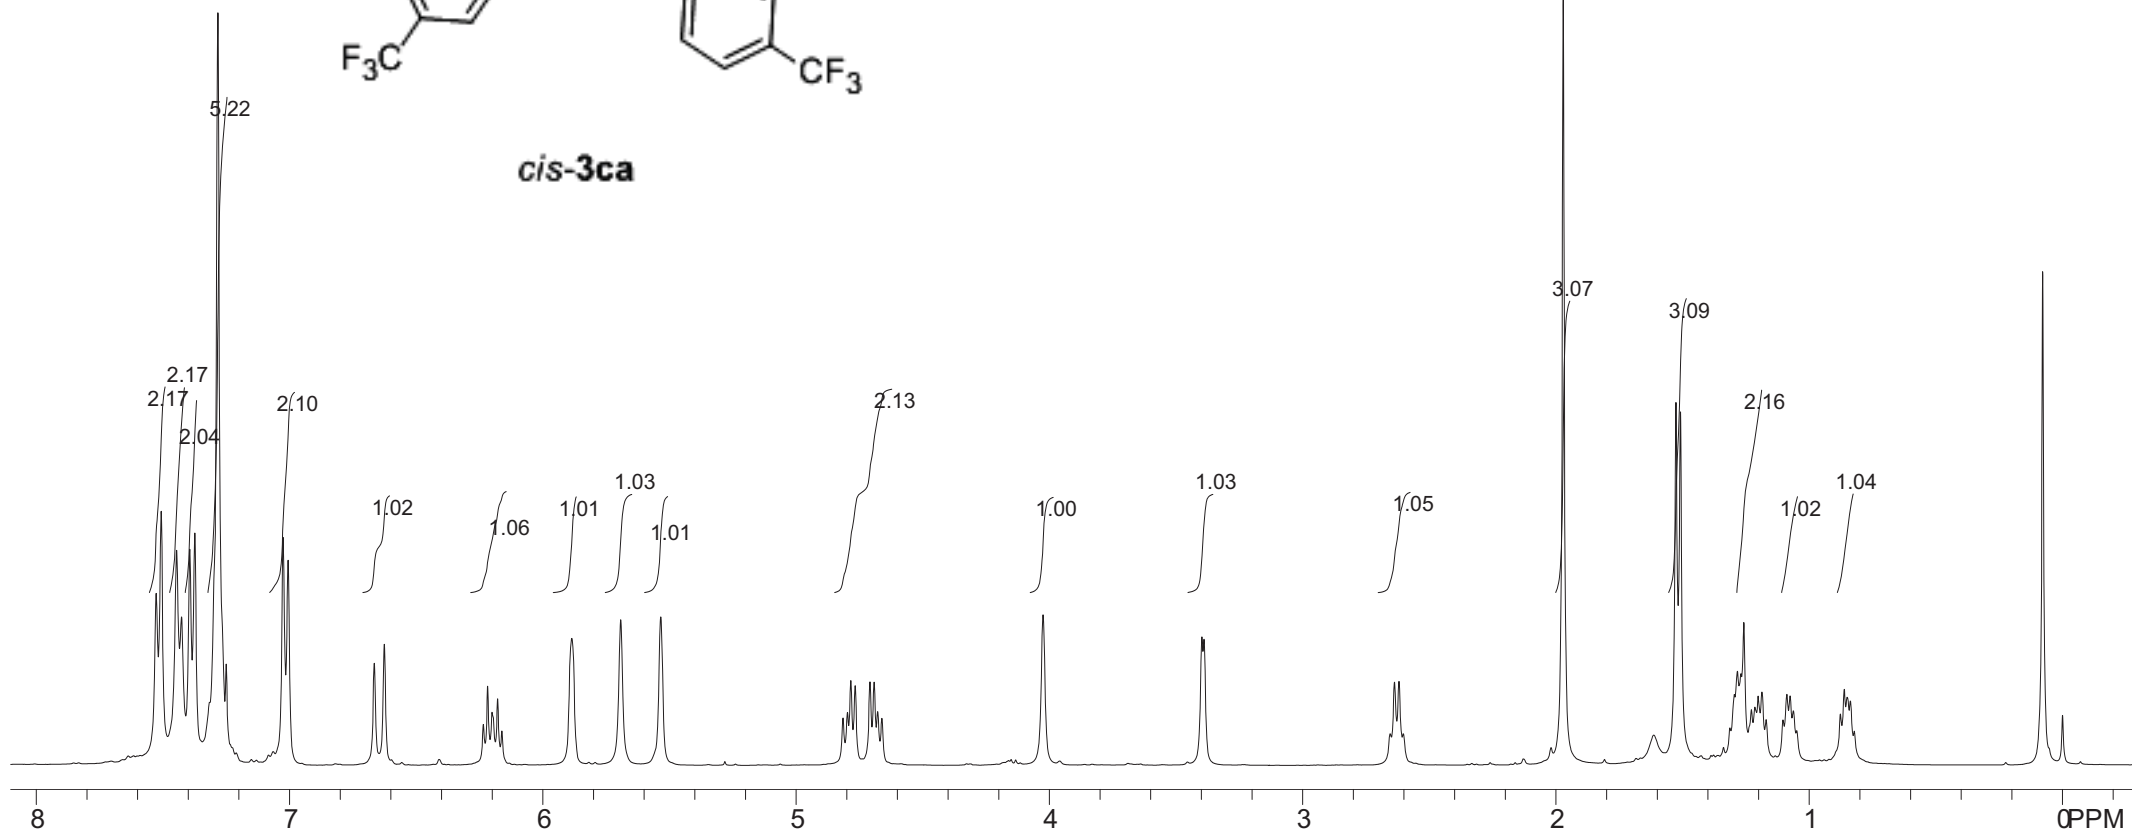

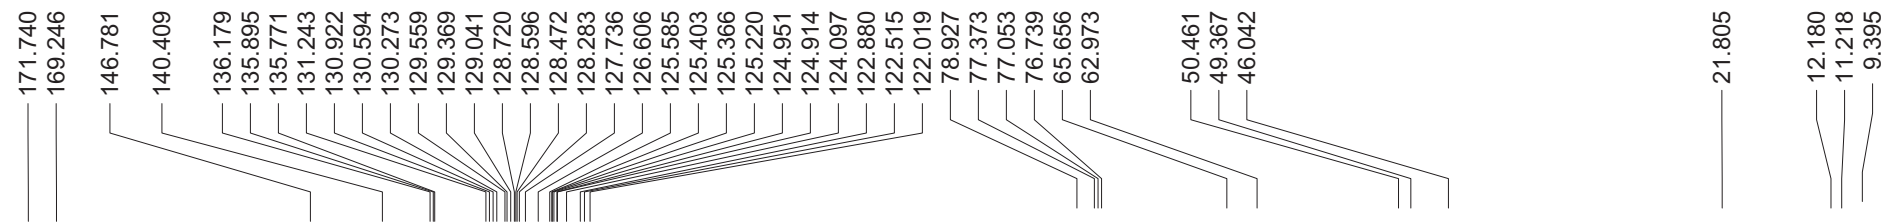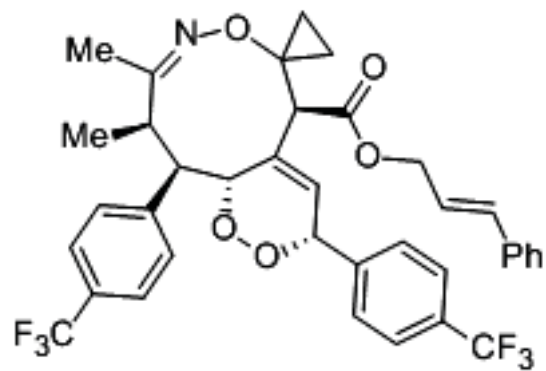

*cis-3ca*

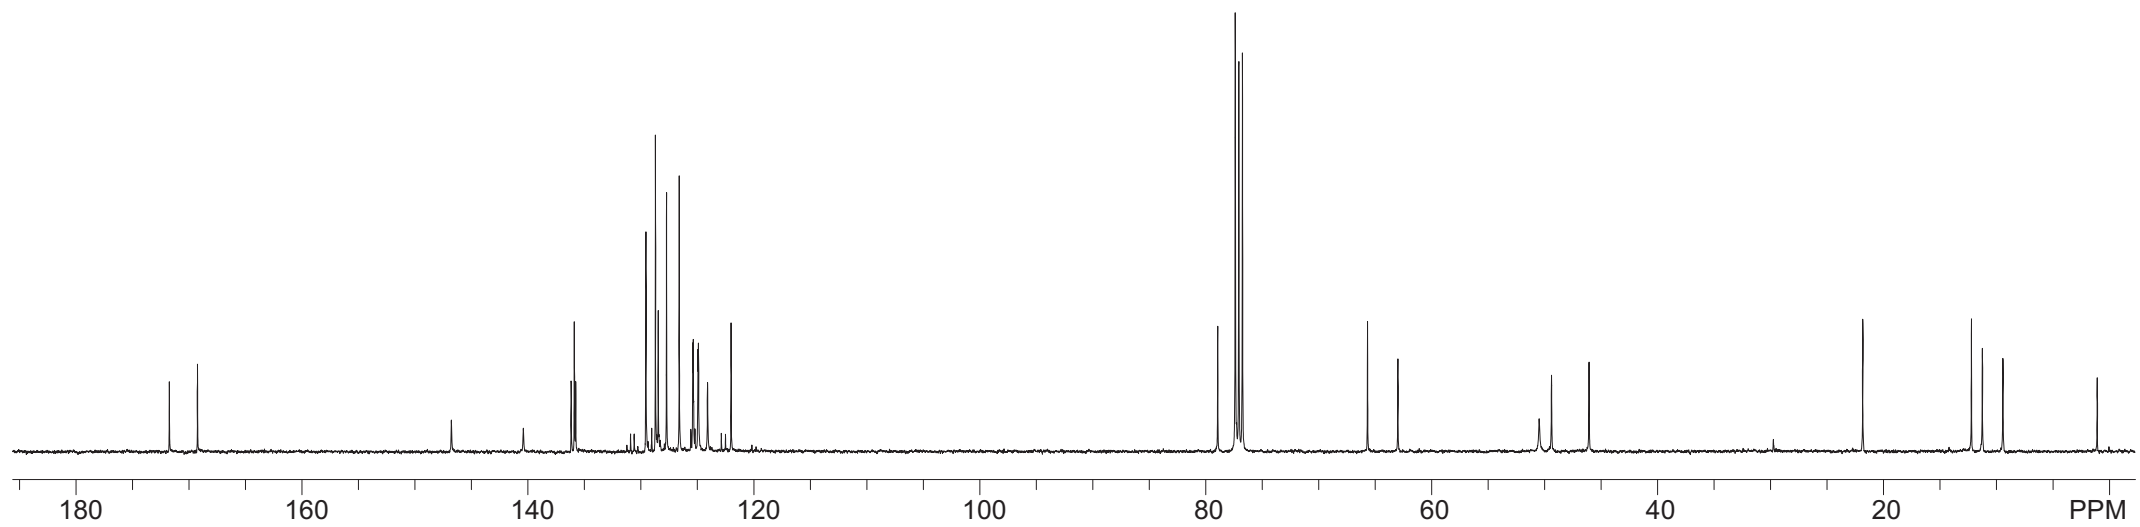

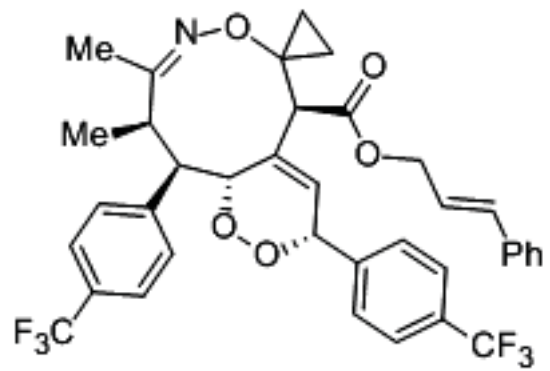

*cis-3ca*

62.439  
62.688

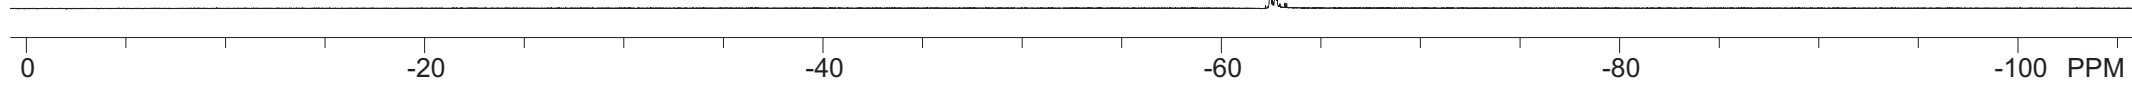

7.192  
7.182  
7.163  
6.998  
6.979  
6.920  
6.900  
6.855  
6.836  
6.561  
6.521  
6.127  
6.110  
6.093  
6.071  
6.054  
5.721  
5.576  
5.386

4.706  
4.689  
4.675  
4.658  
4.611  
4.595  
4.581  
4.564  
3.952

3.270  
3.260

2.679  
2.662  
2.644  
2.627  
2.187  
1.870

1.414  
1.396  
1.218  
1.203  
1.181  
1.164  
1.146  
1.129  
1.109  
1.095  
1.082  
1.068  
1.052  
1.003  
0.989  
0.975  
0.963  
0.949  
0.787  
0.760  
0.748  
0.733  
-0.000

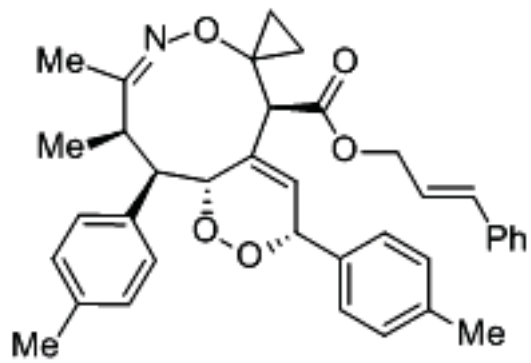

*cis-3da*

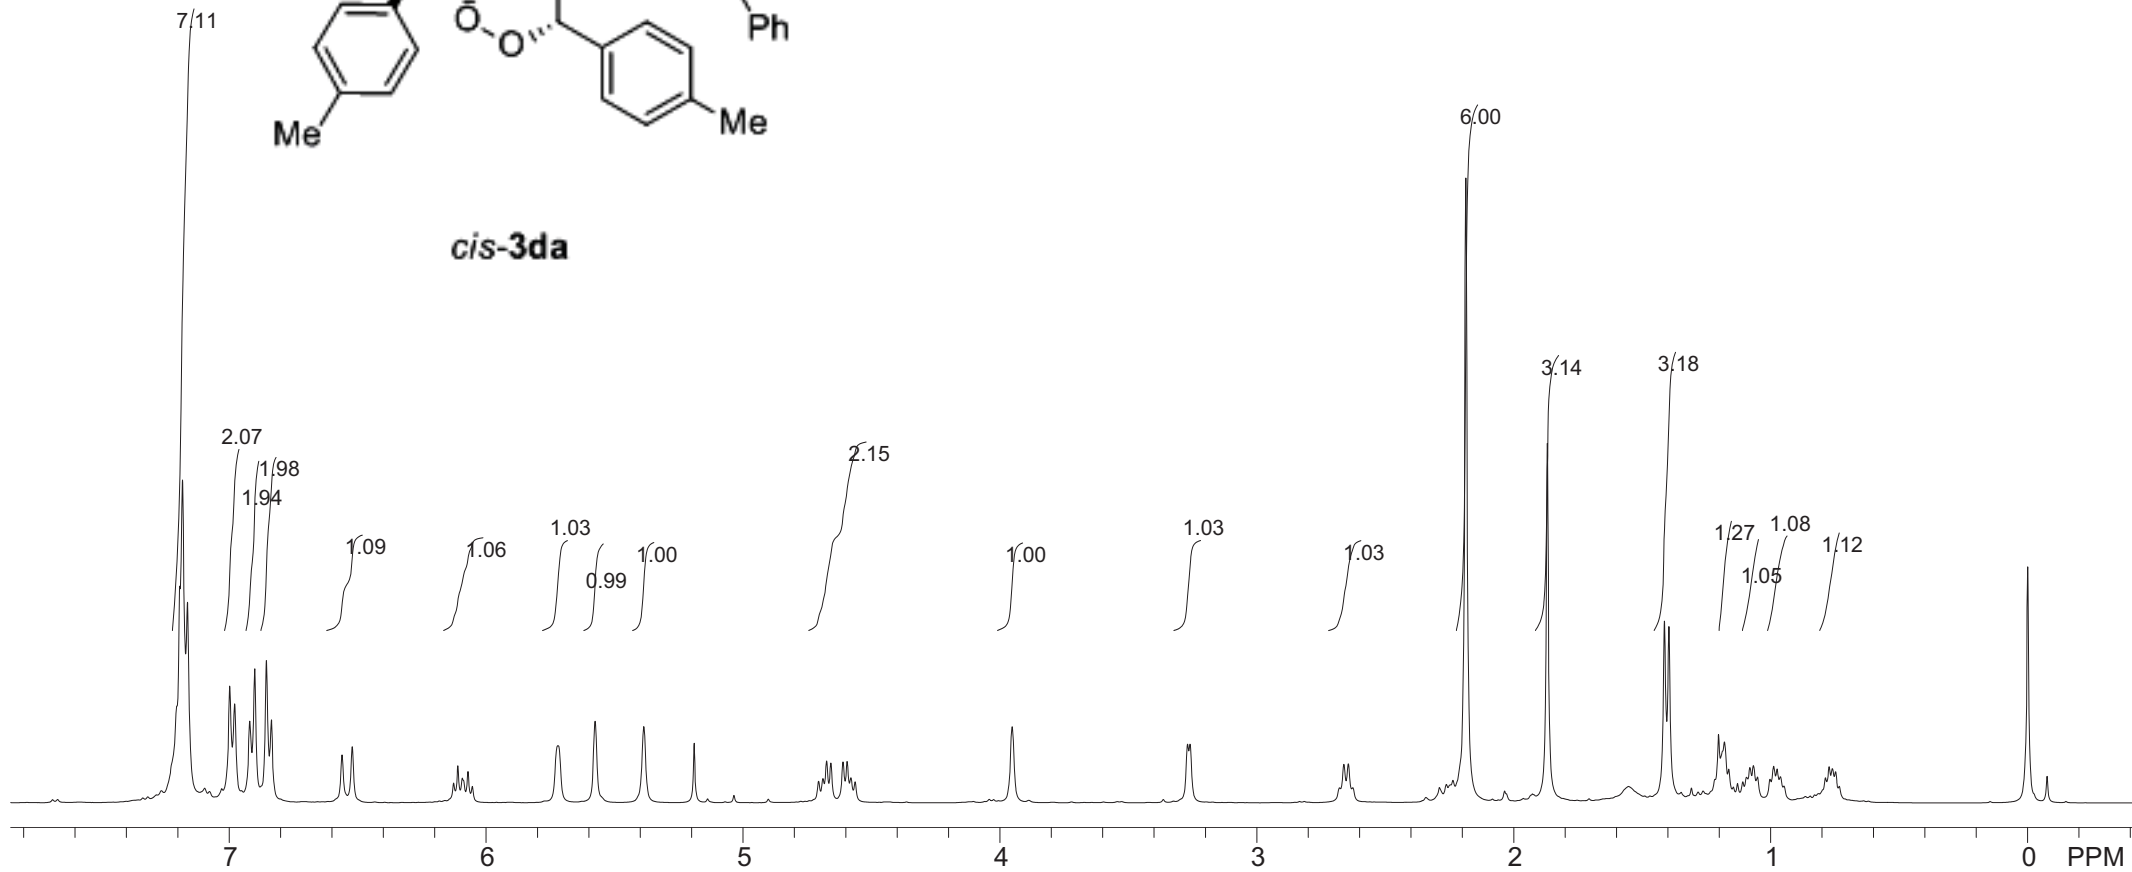

172.577  
169.485

139.896  
138.424  
135.842  
135.813  
135.383  
135.325  
133.378  
129.200  
128.967  
128.595  
128.536  
128.150  
128.099  
126.582  
125.138  
122.229

79.691  
77.554  
77.321  
77.000  
76.686

65.443  
62.767

50.517  
49.321  
46.113

21.730  
21.184  
20.994  
12.412  
11.325  
9.364

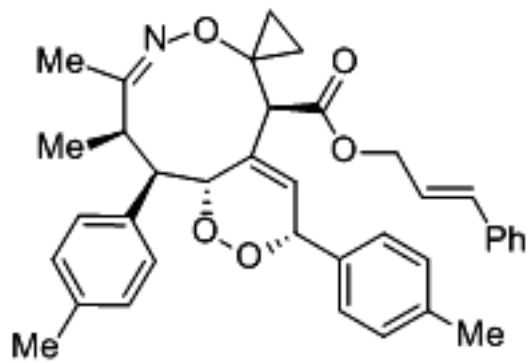

*cis-3da*

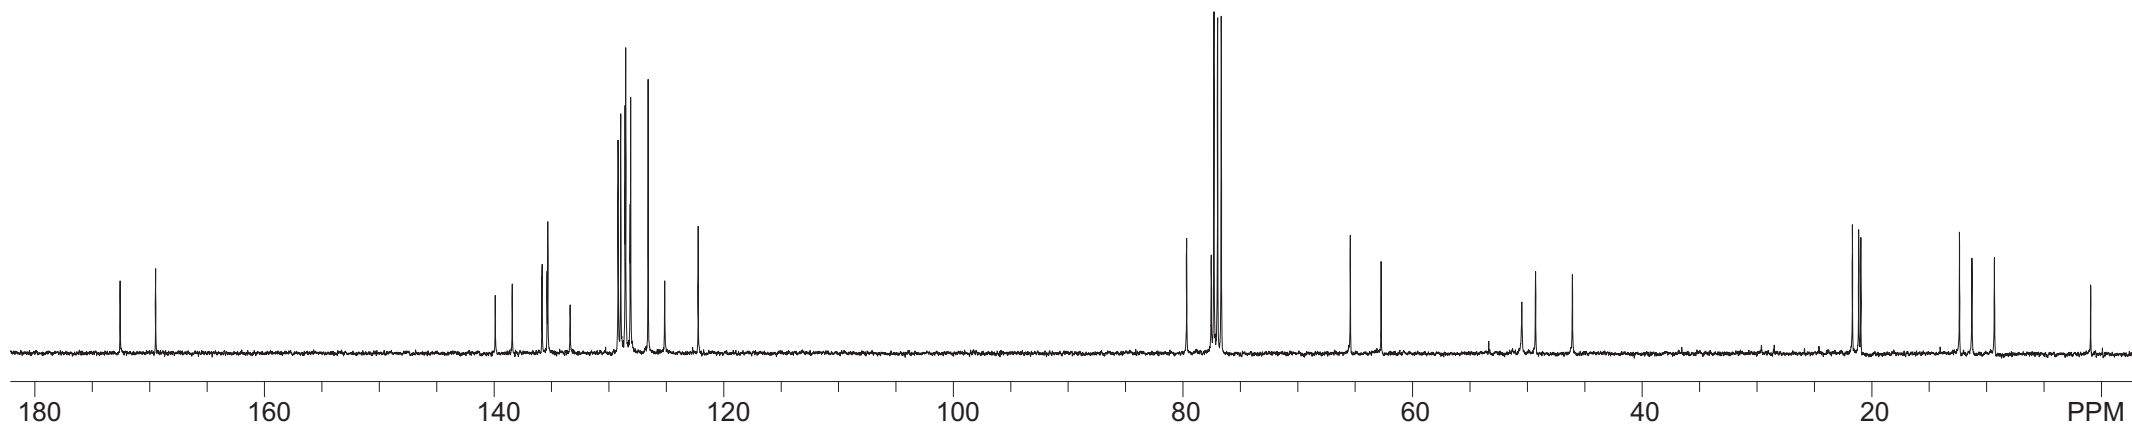

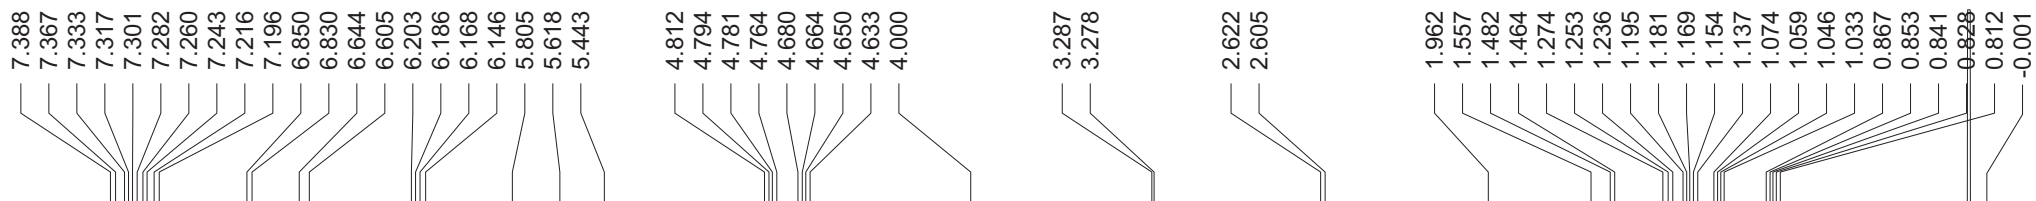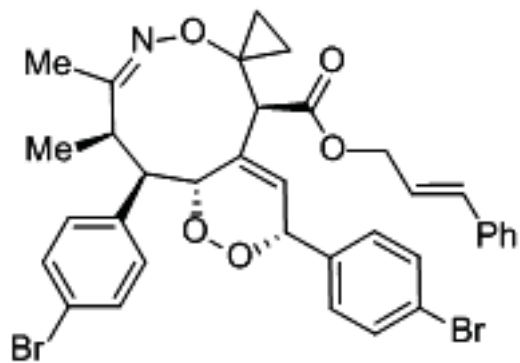

*cis-3ea*

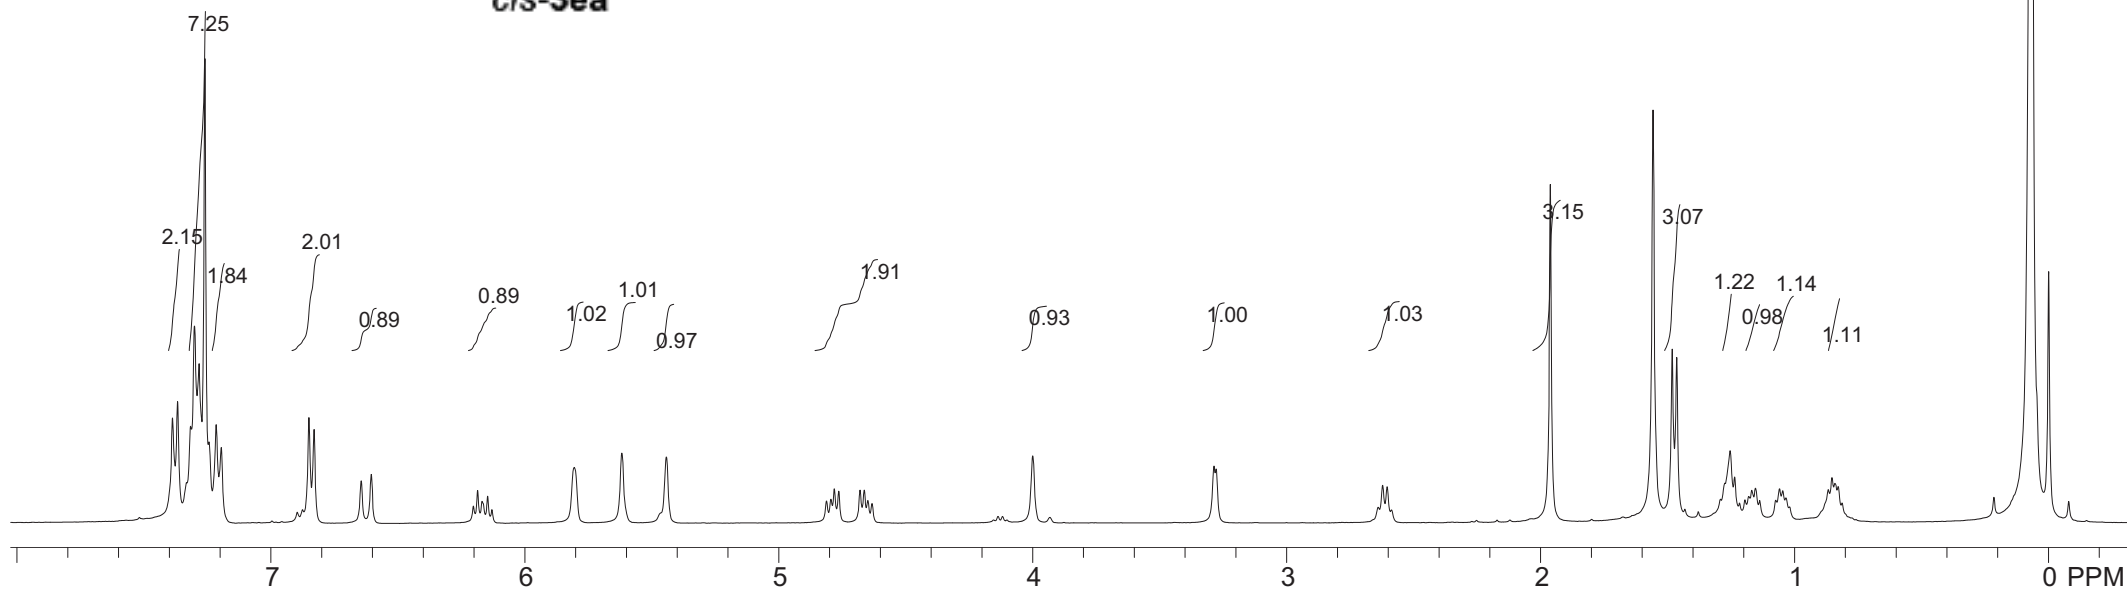

171.937  
169.283  
141.845  
135.925  
135.786  
135.720  
131.637  
131.083  
130.923  
129.523  
128.699  
128.407  
126.584  
124.309  
122.887  
122.012  
120.532

79.087  
77.330  
77.213  
77.009  
76.696

65.576  
62.791

50.184  
49.134  
46.224

21.856

12.078  
11.247  
9.351

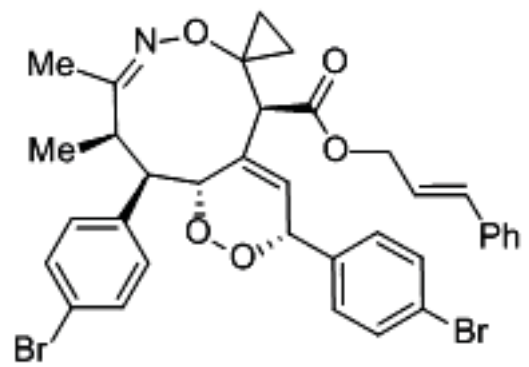

*cis-3ea*

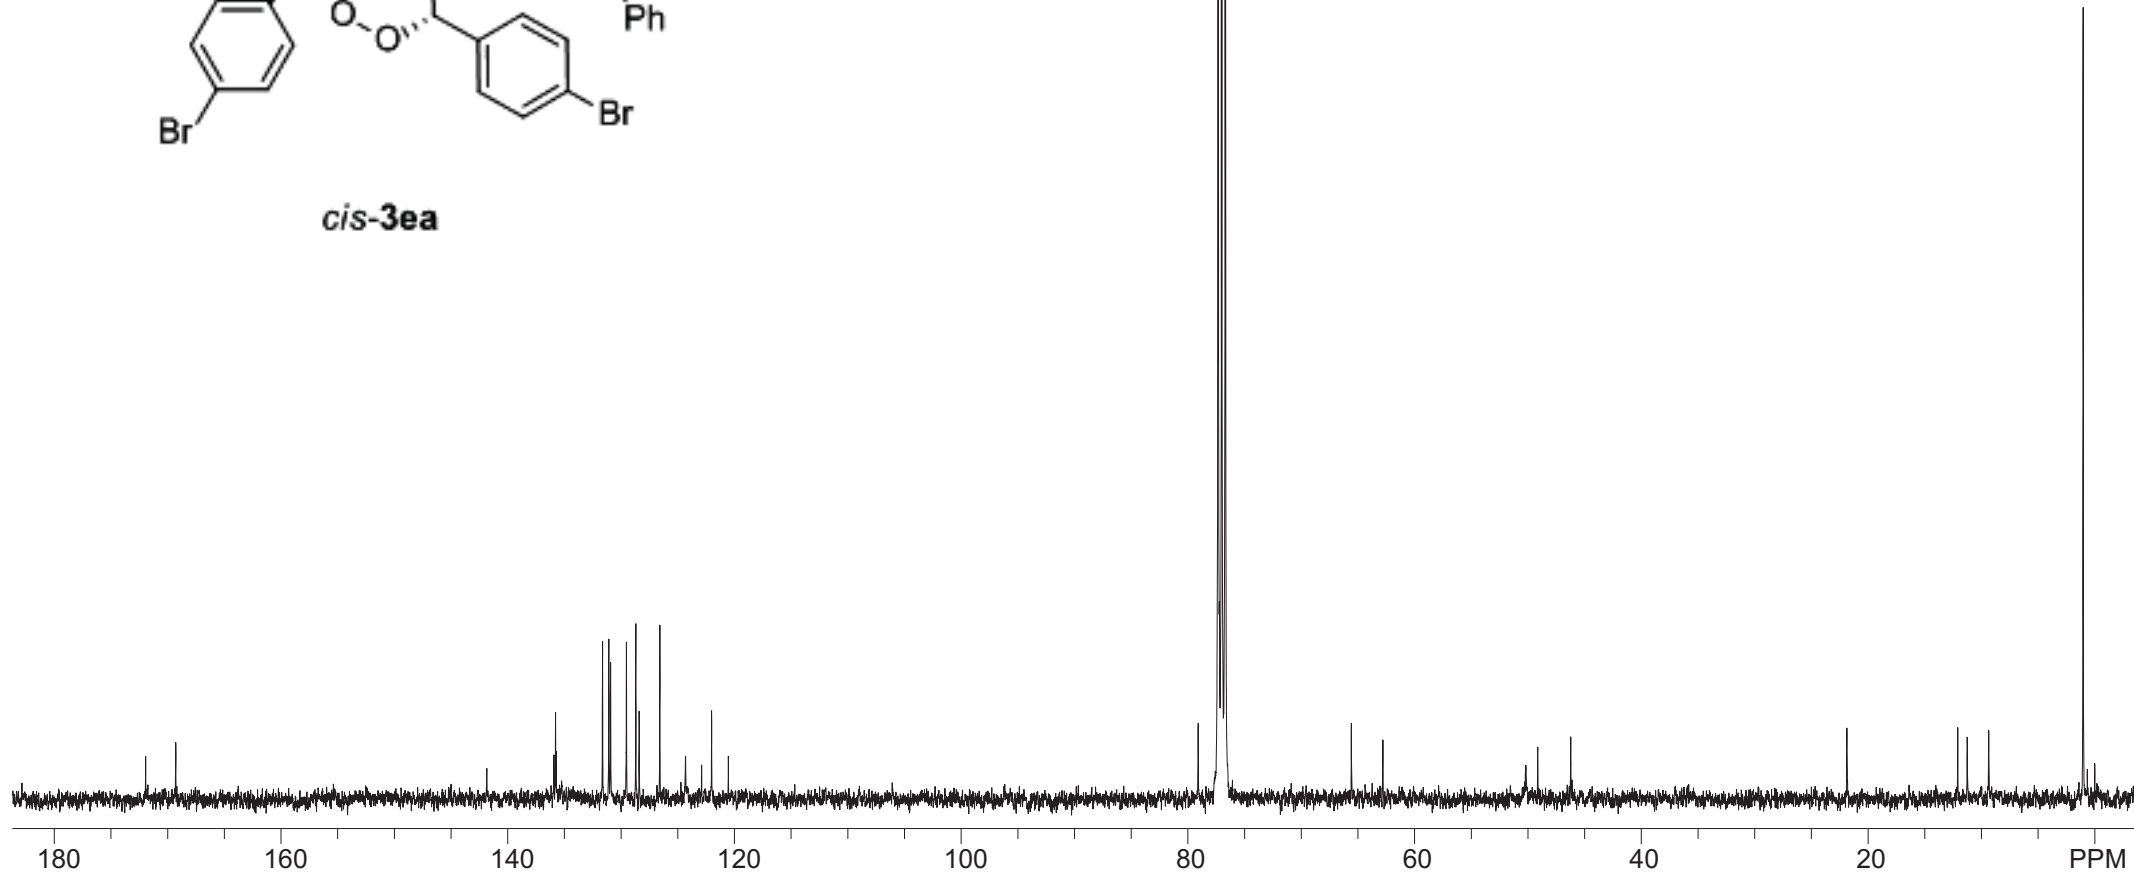

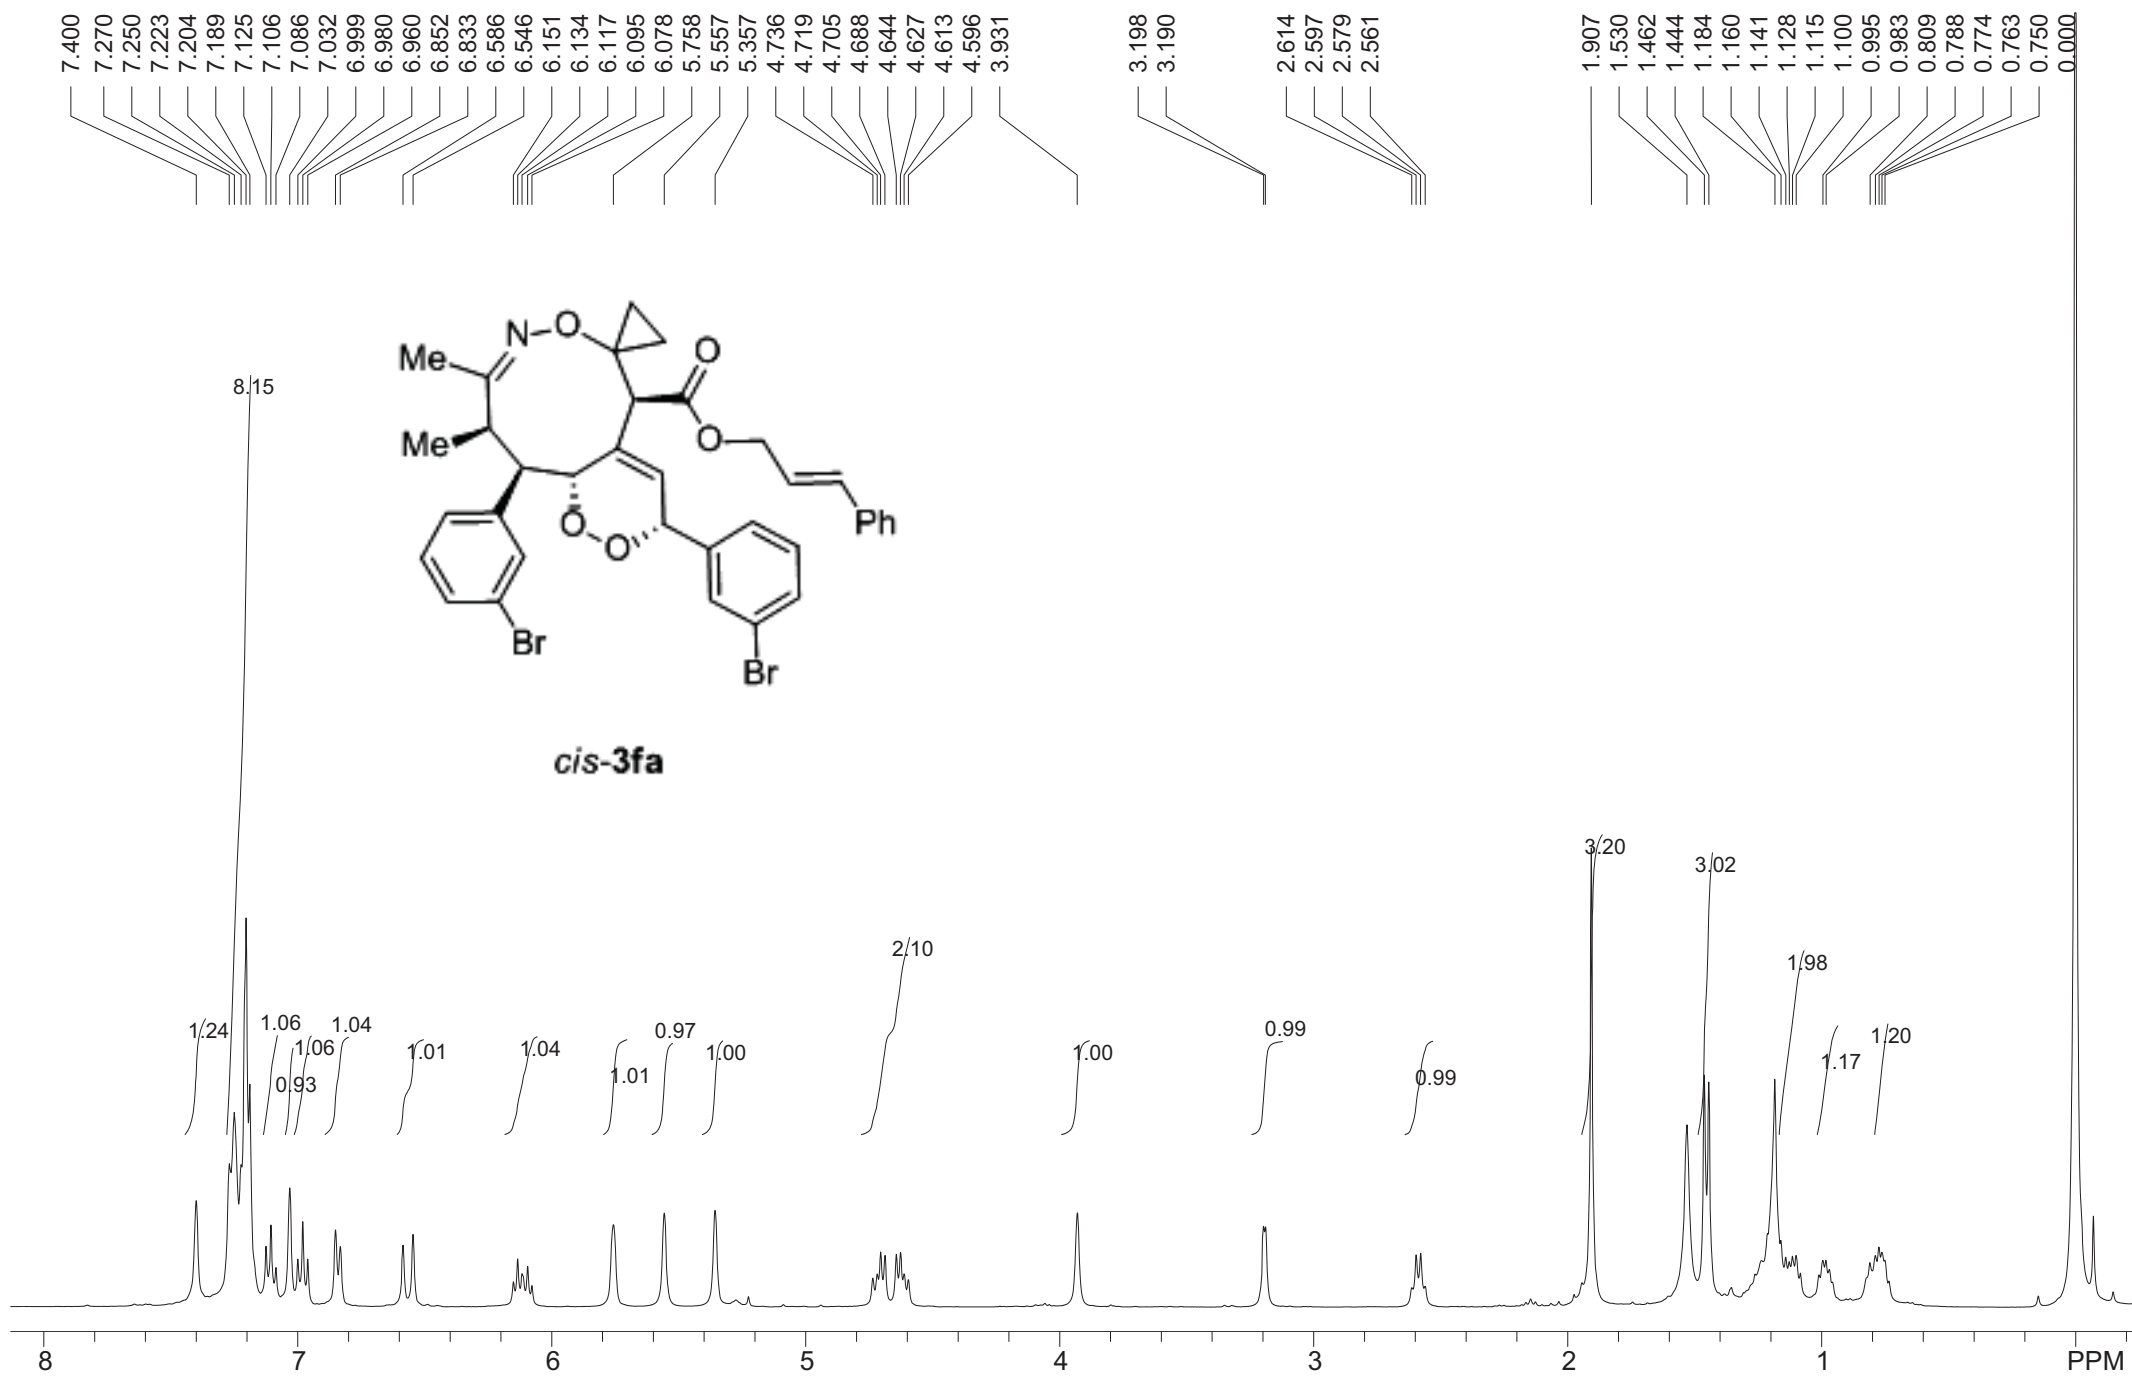



171.957  
169.201  
144.993  
138.533  
135.755  
135.653  
132.291  
131.774  
130.695  
130.038  
129.667  
129.564  
128.602  
128.259  
127.720  
126.597  
126.378  
124.147  
122.390  
122.010  
121.930

78.991  
77.314  
77.131  
77.000  
76.679

65.611  
62.854

50.072  
49.117  
46.266

21.869

12.208  
11.107  
9.277

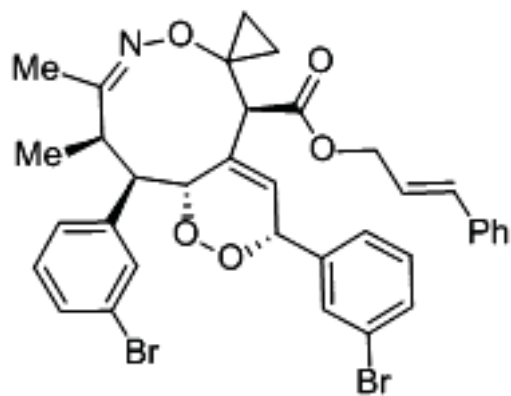

*cis-3fa*

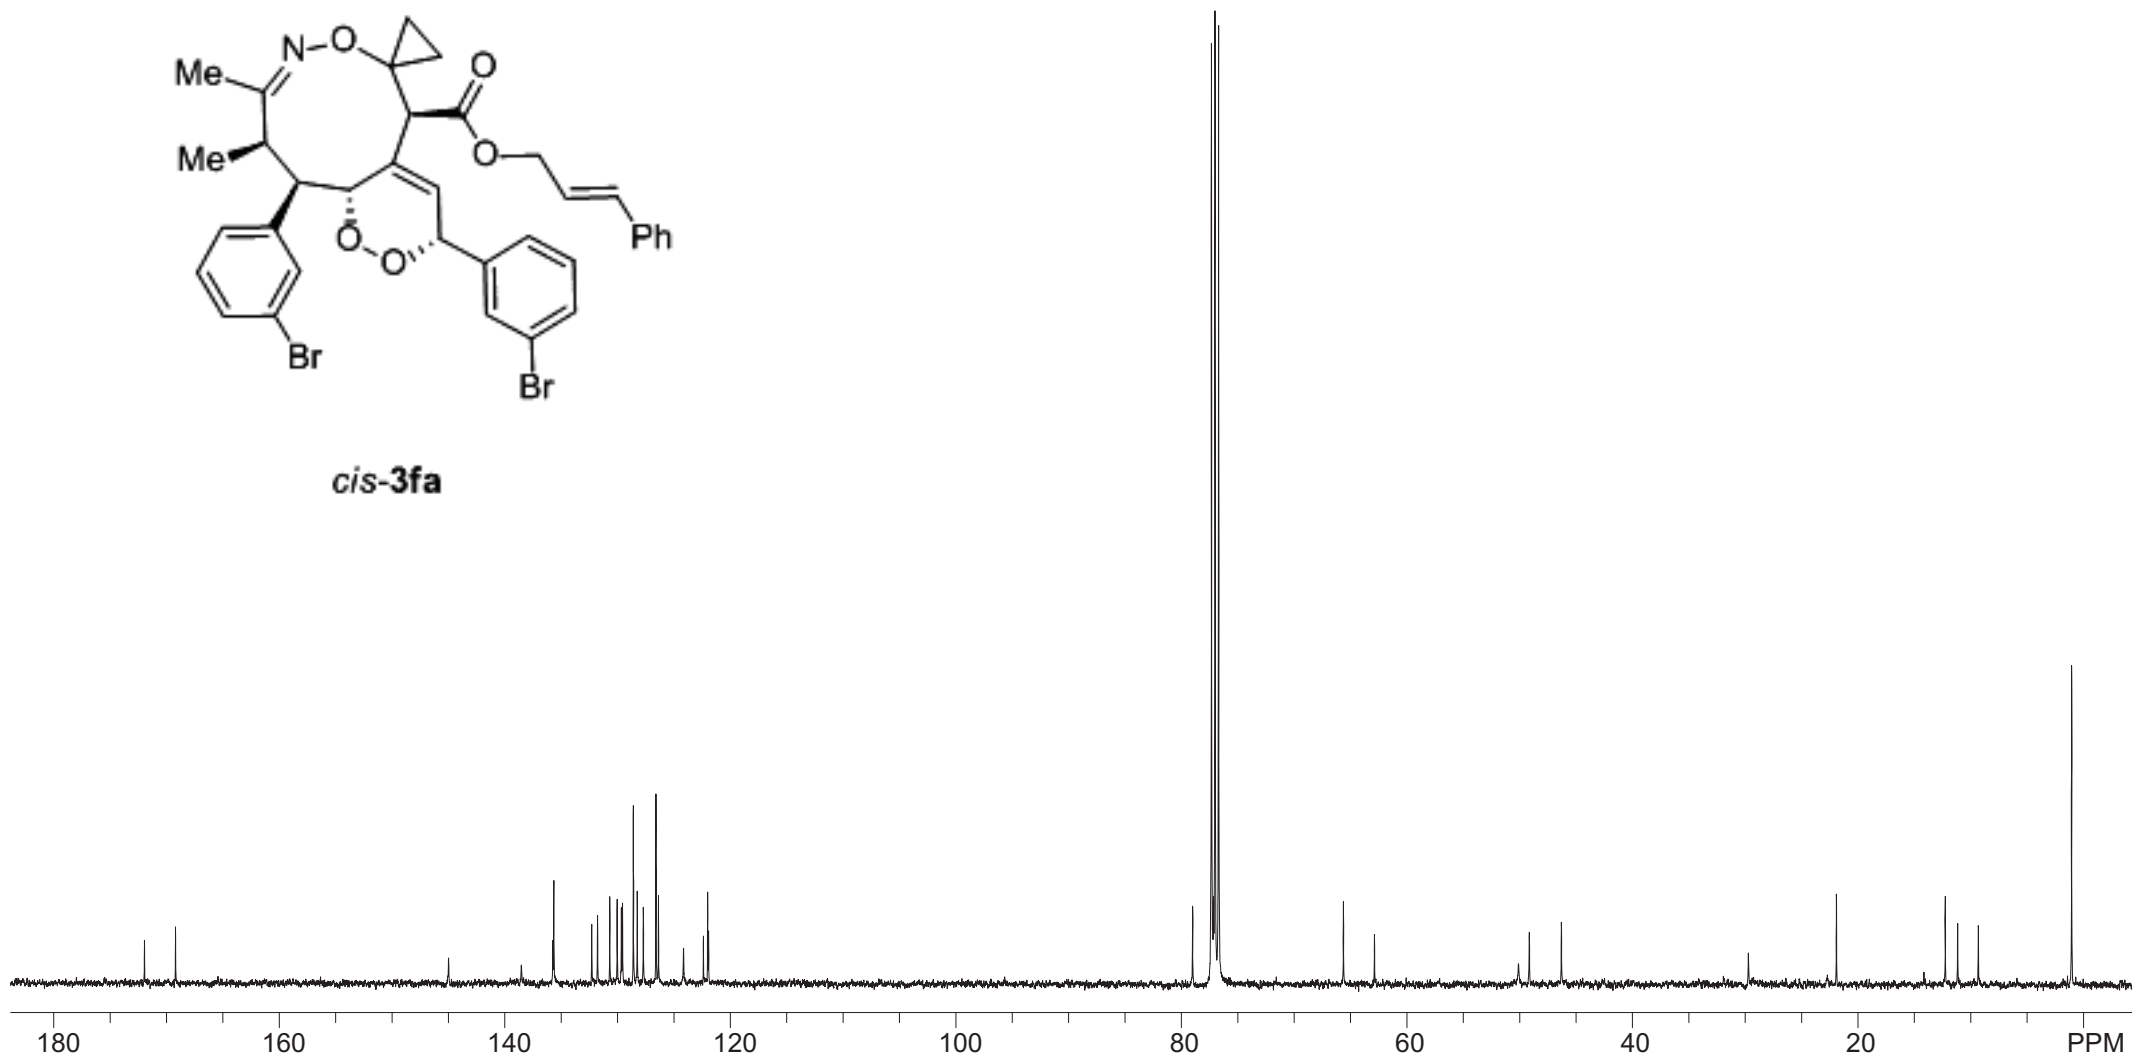

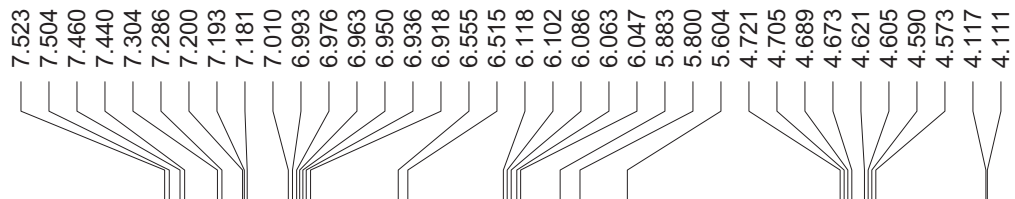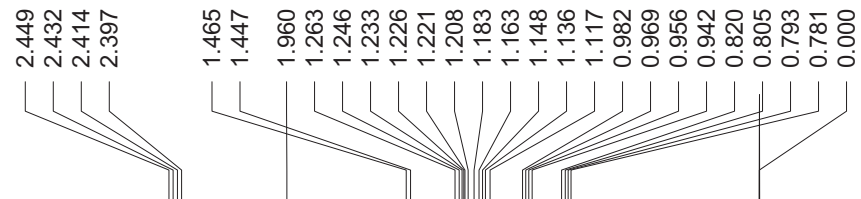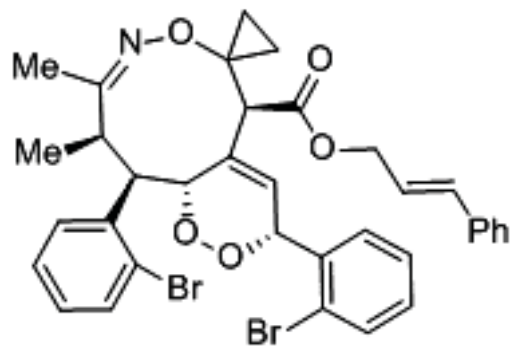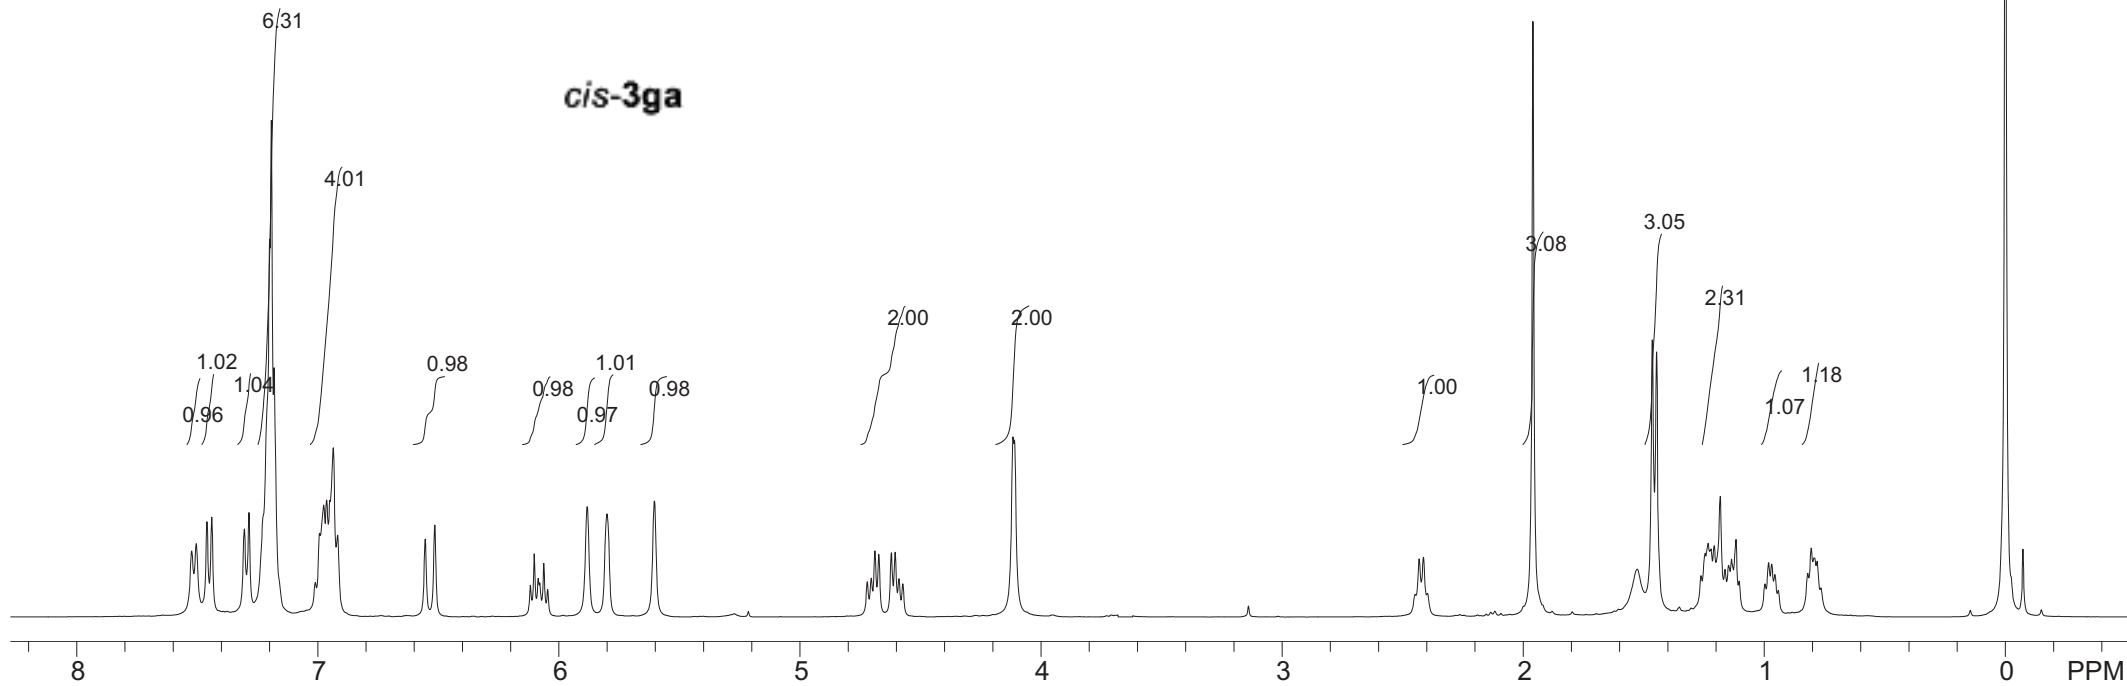

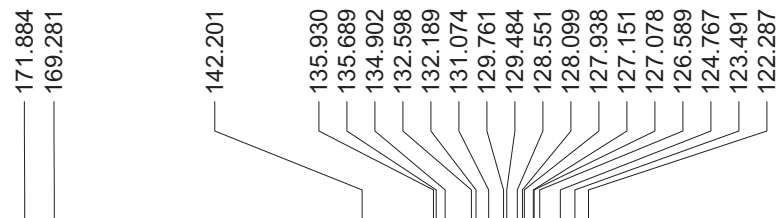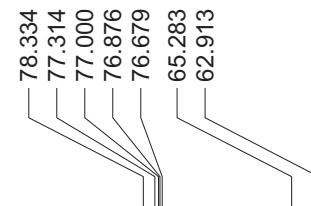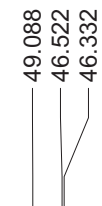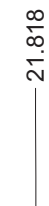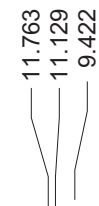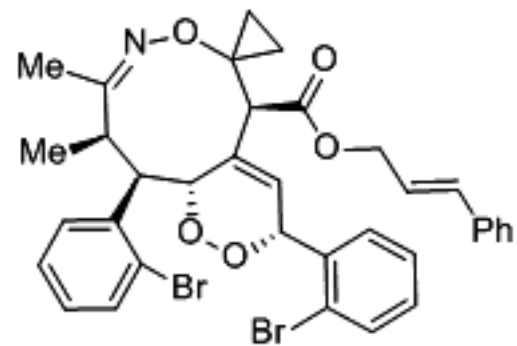

*cis-3ga*

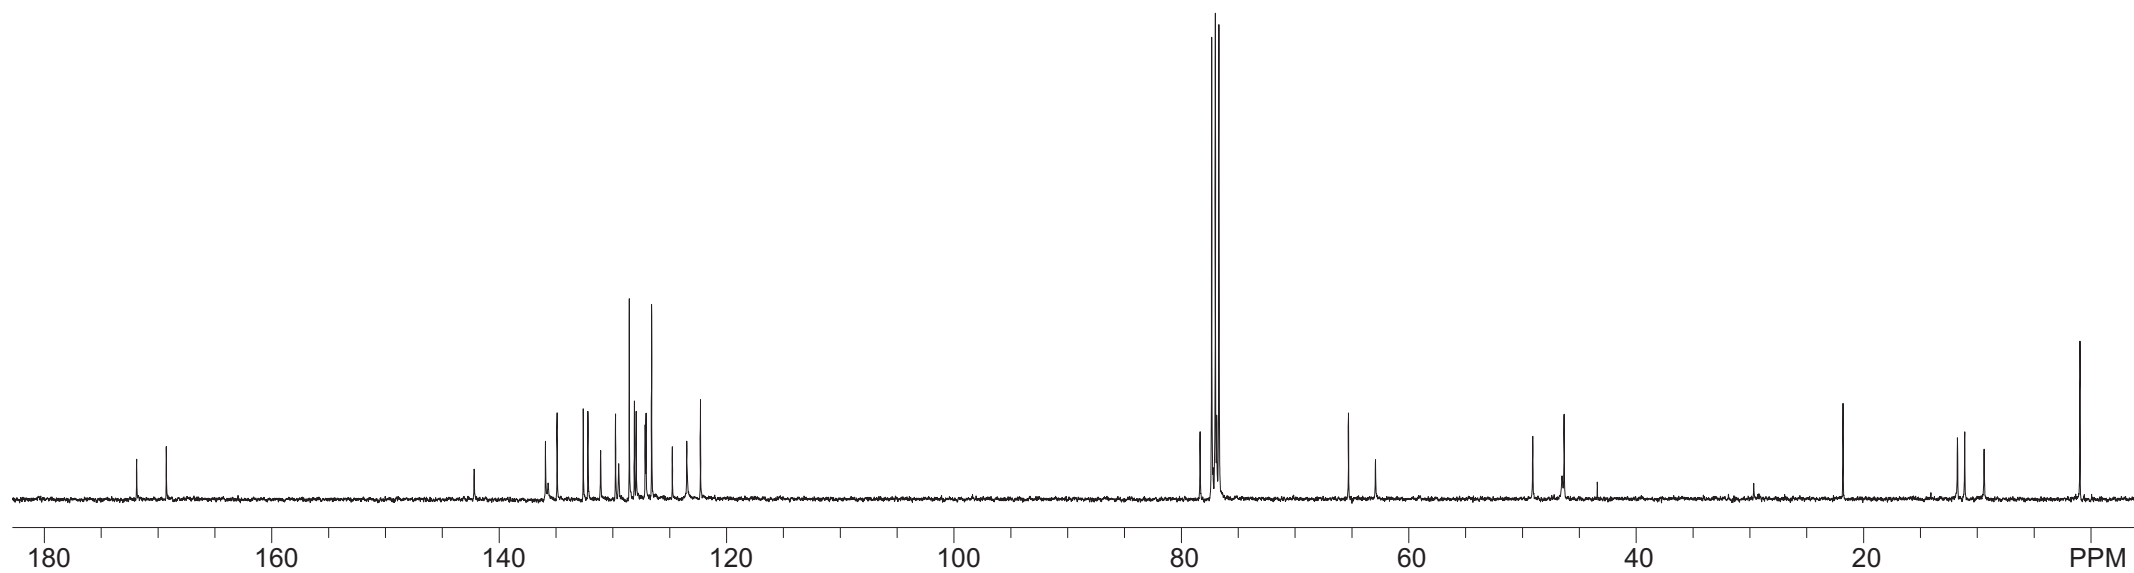

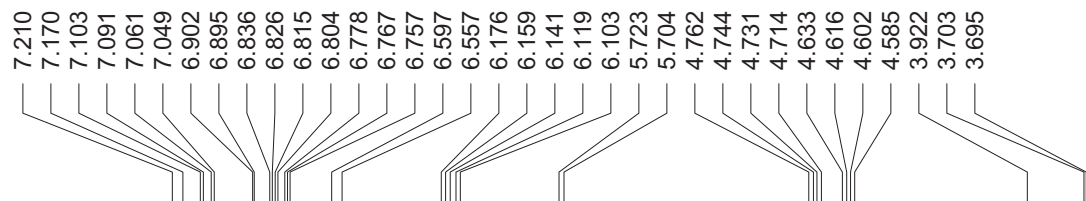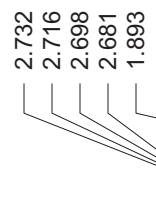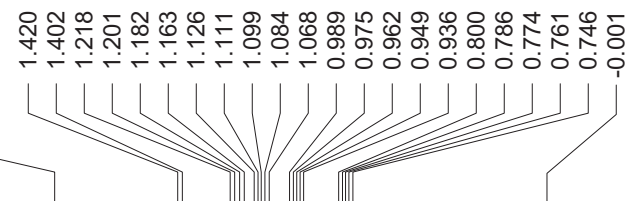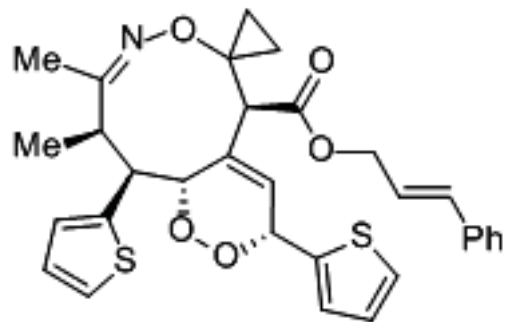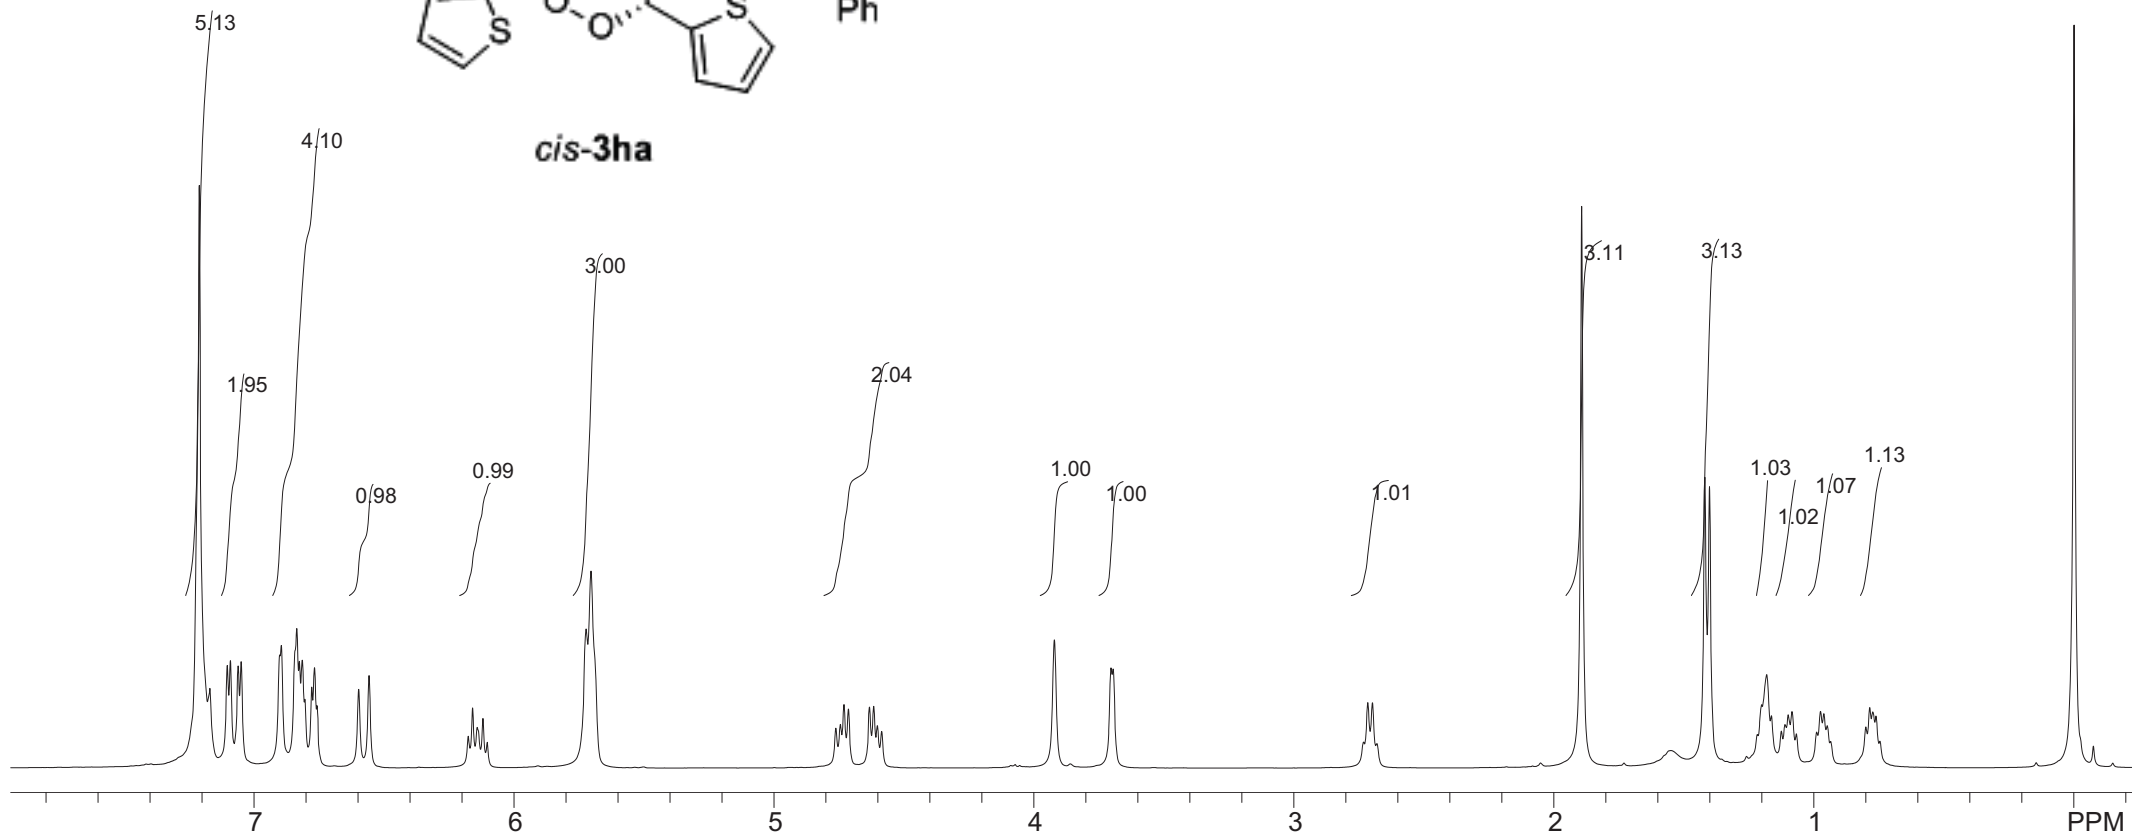

171.738  
169.157  
143.827  
138.329  
135.828  
135.478  
135.427  
128.558  
128.179  
127.938  
126.786  
126.619  
126.466  
126.043  
125.984  
124.584  
123.768  
122.200

77.620  
77.314  
77.000  
76.679  
74.681  
65.516  
62.738

48.913  
46.434  
46.026

21.869  
12.368  
11.304  
9.473

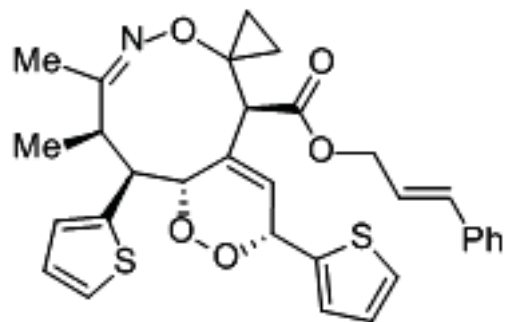

*cis-3ha*

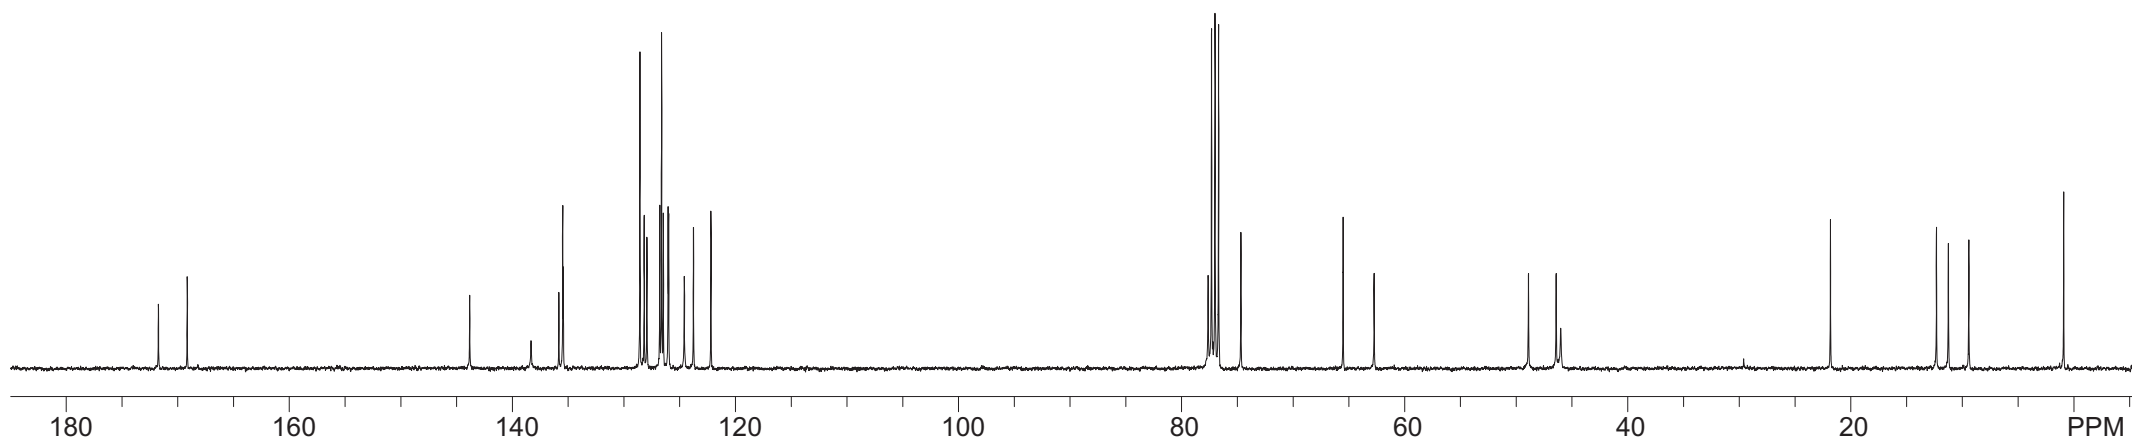

7.284 7.213 7.195 7.176 7.154 7.119 7.113 7.100 7.083 7.064 7.048 6.882 6.864 6.558 6.518 6.110 6.093 6.076 6.072 6.054 6.037 5.798 5.555 5.374 4.703 4.686 4.672 4.656 4.611 4.594 4.579 4.563 4.018 3.153 3.145 2.416 2.394 2.389 2.348 2.330 2.311 2.293 2.280 2.140 2.123 2.104 2.086 2.068 2.049 2.042 2.031 2.011 1.992 1.224 1.206 1.183 1.169 1.103 1.085 1.066 0.971 0.956 0.944 0.930 0.917 0.879 0.861 0.843 0.793 0.768 0.755 0.739 0.000

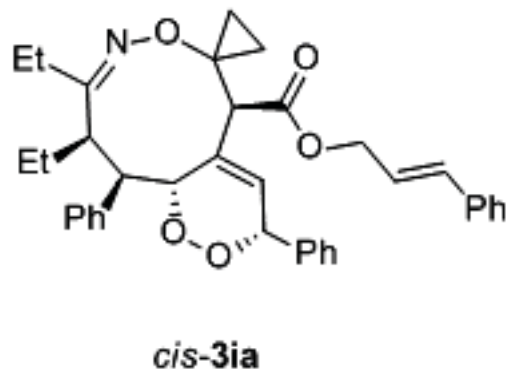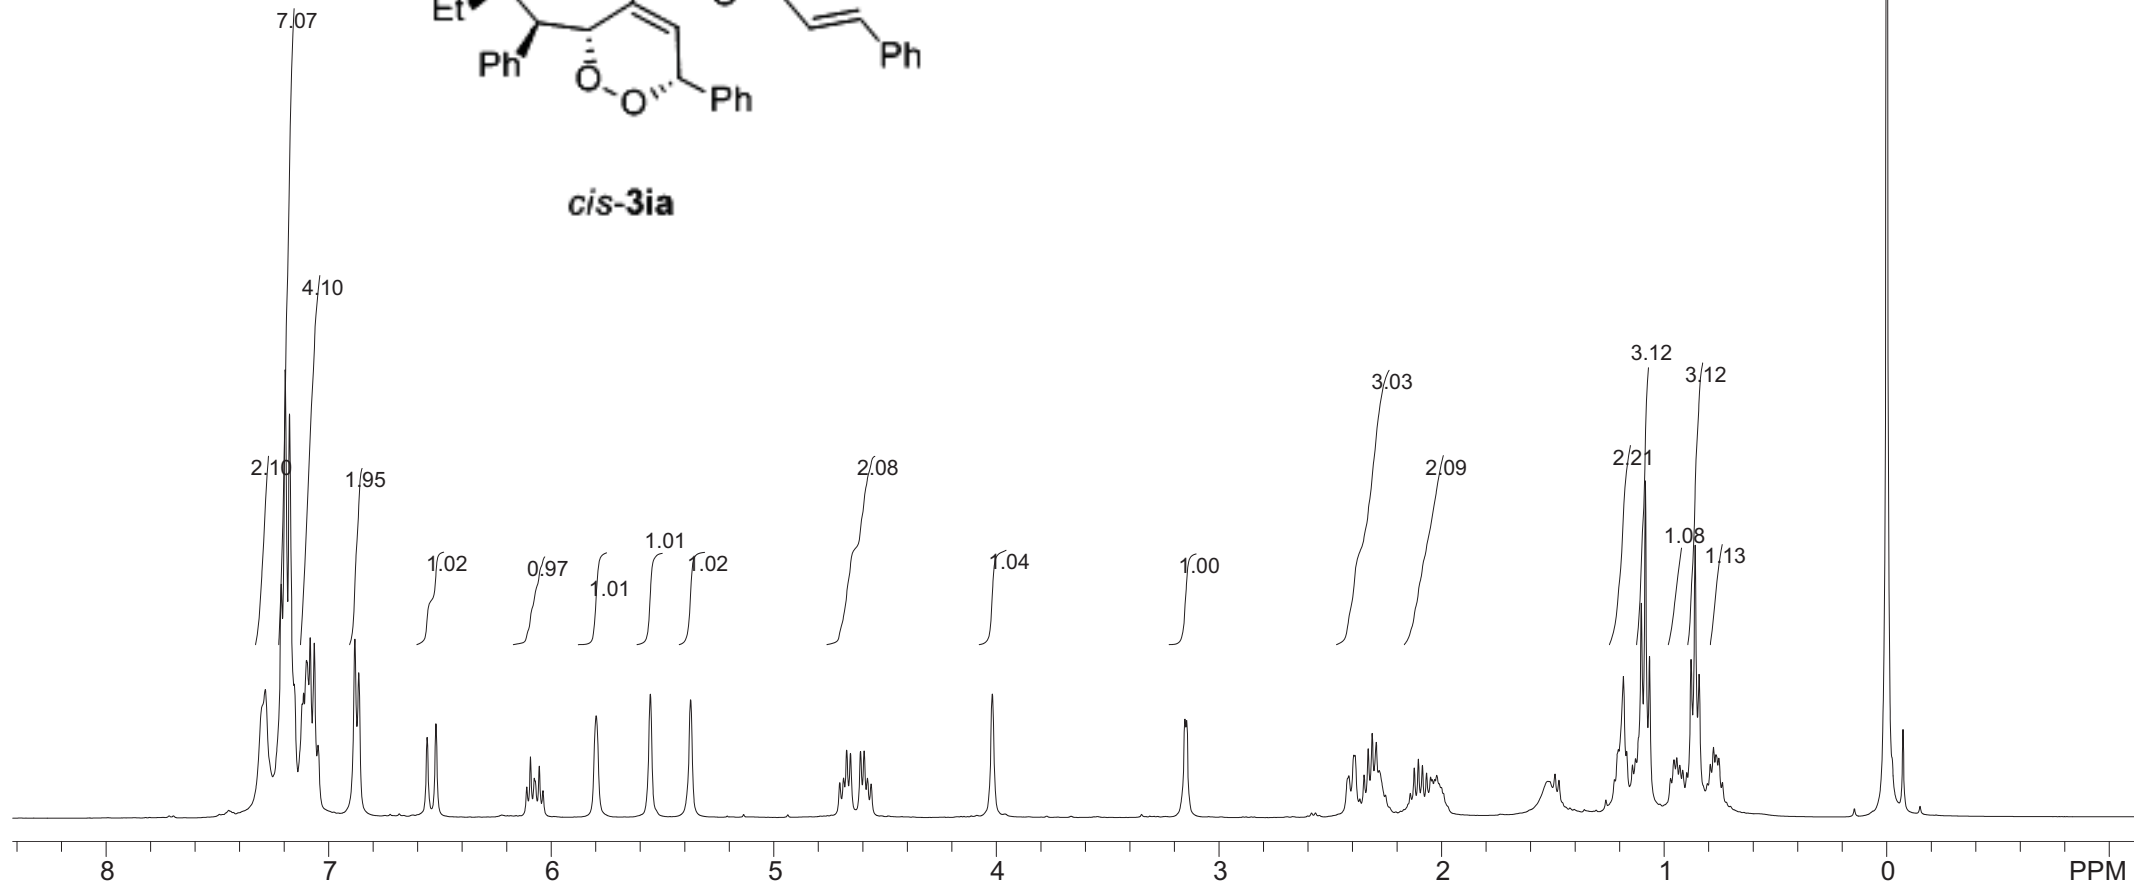

175.151  
 169.325  
 142.981  
 136.535  
 135.828  
 135.405  
 135.368  
 129.375  
 128.580  
 128.478  
 128.208  
 128.179  
 127.931  
 127.836  
 126.597  
 126.429  
 124.329  
 122.215

79.610  
 77.503  
 77.321  
 77.000  
 76.679

65.458  
 62.628

53.419  
 51.276  
 48.629

30.881

20.848

13.280  
 11.253  
 9.284

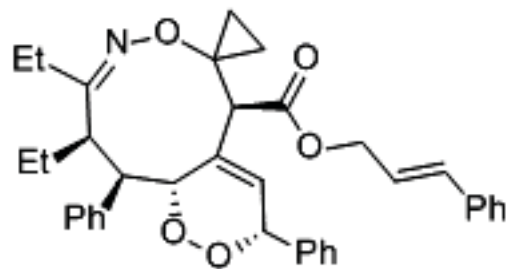

*cis-3ia*

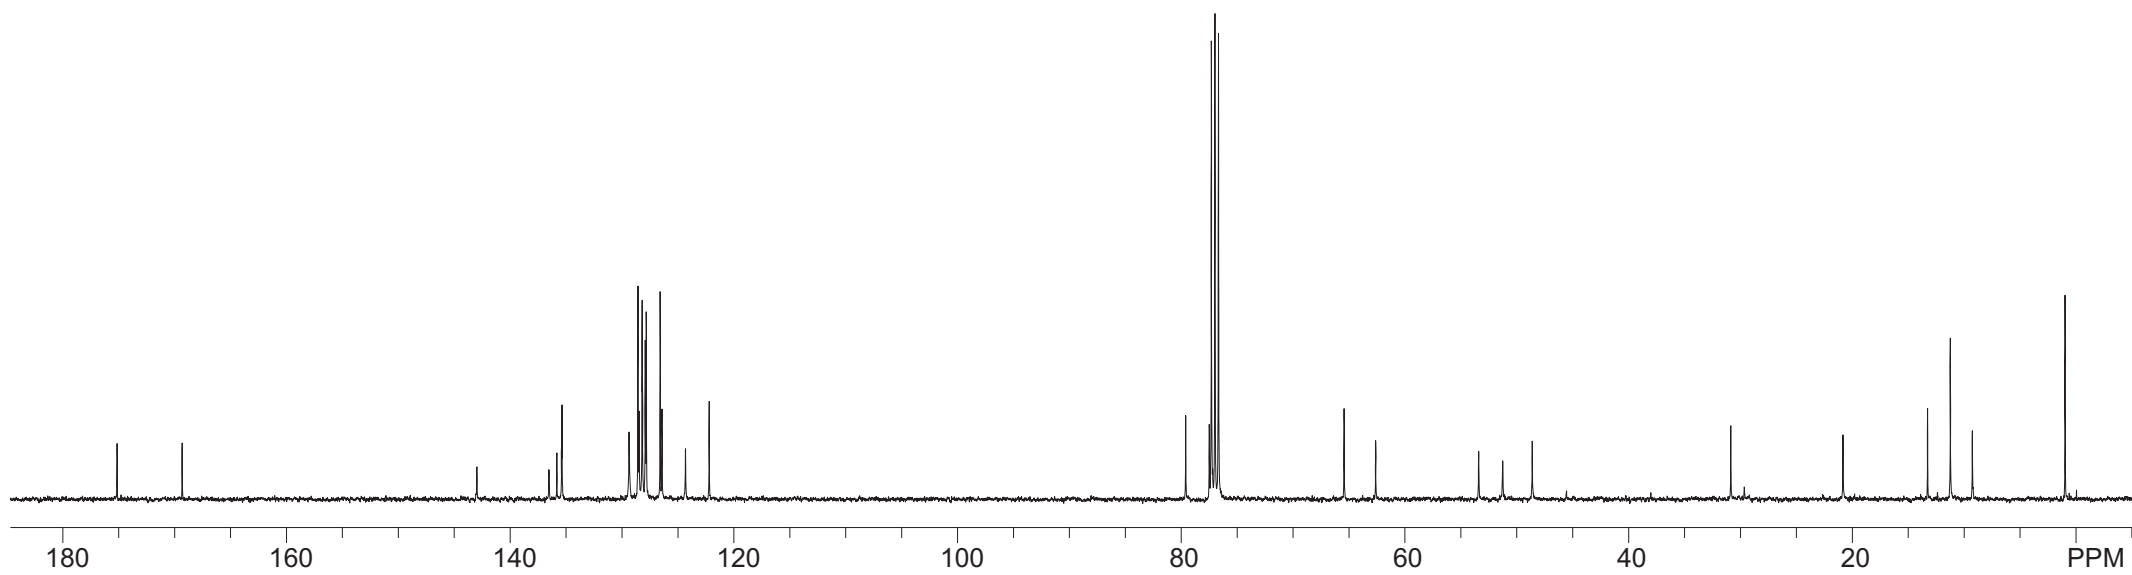

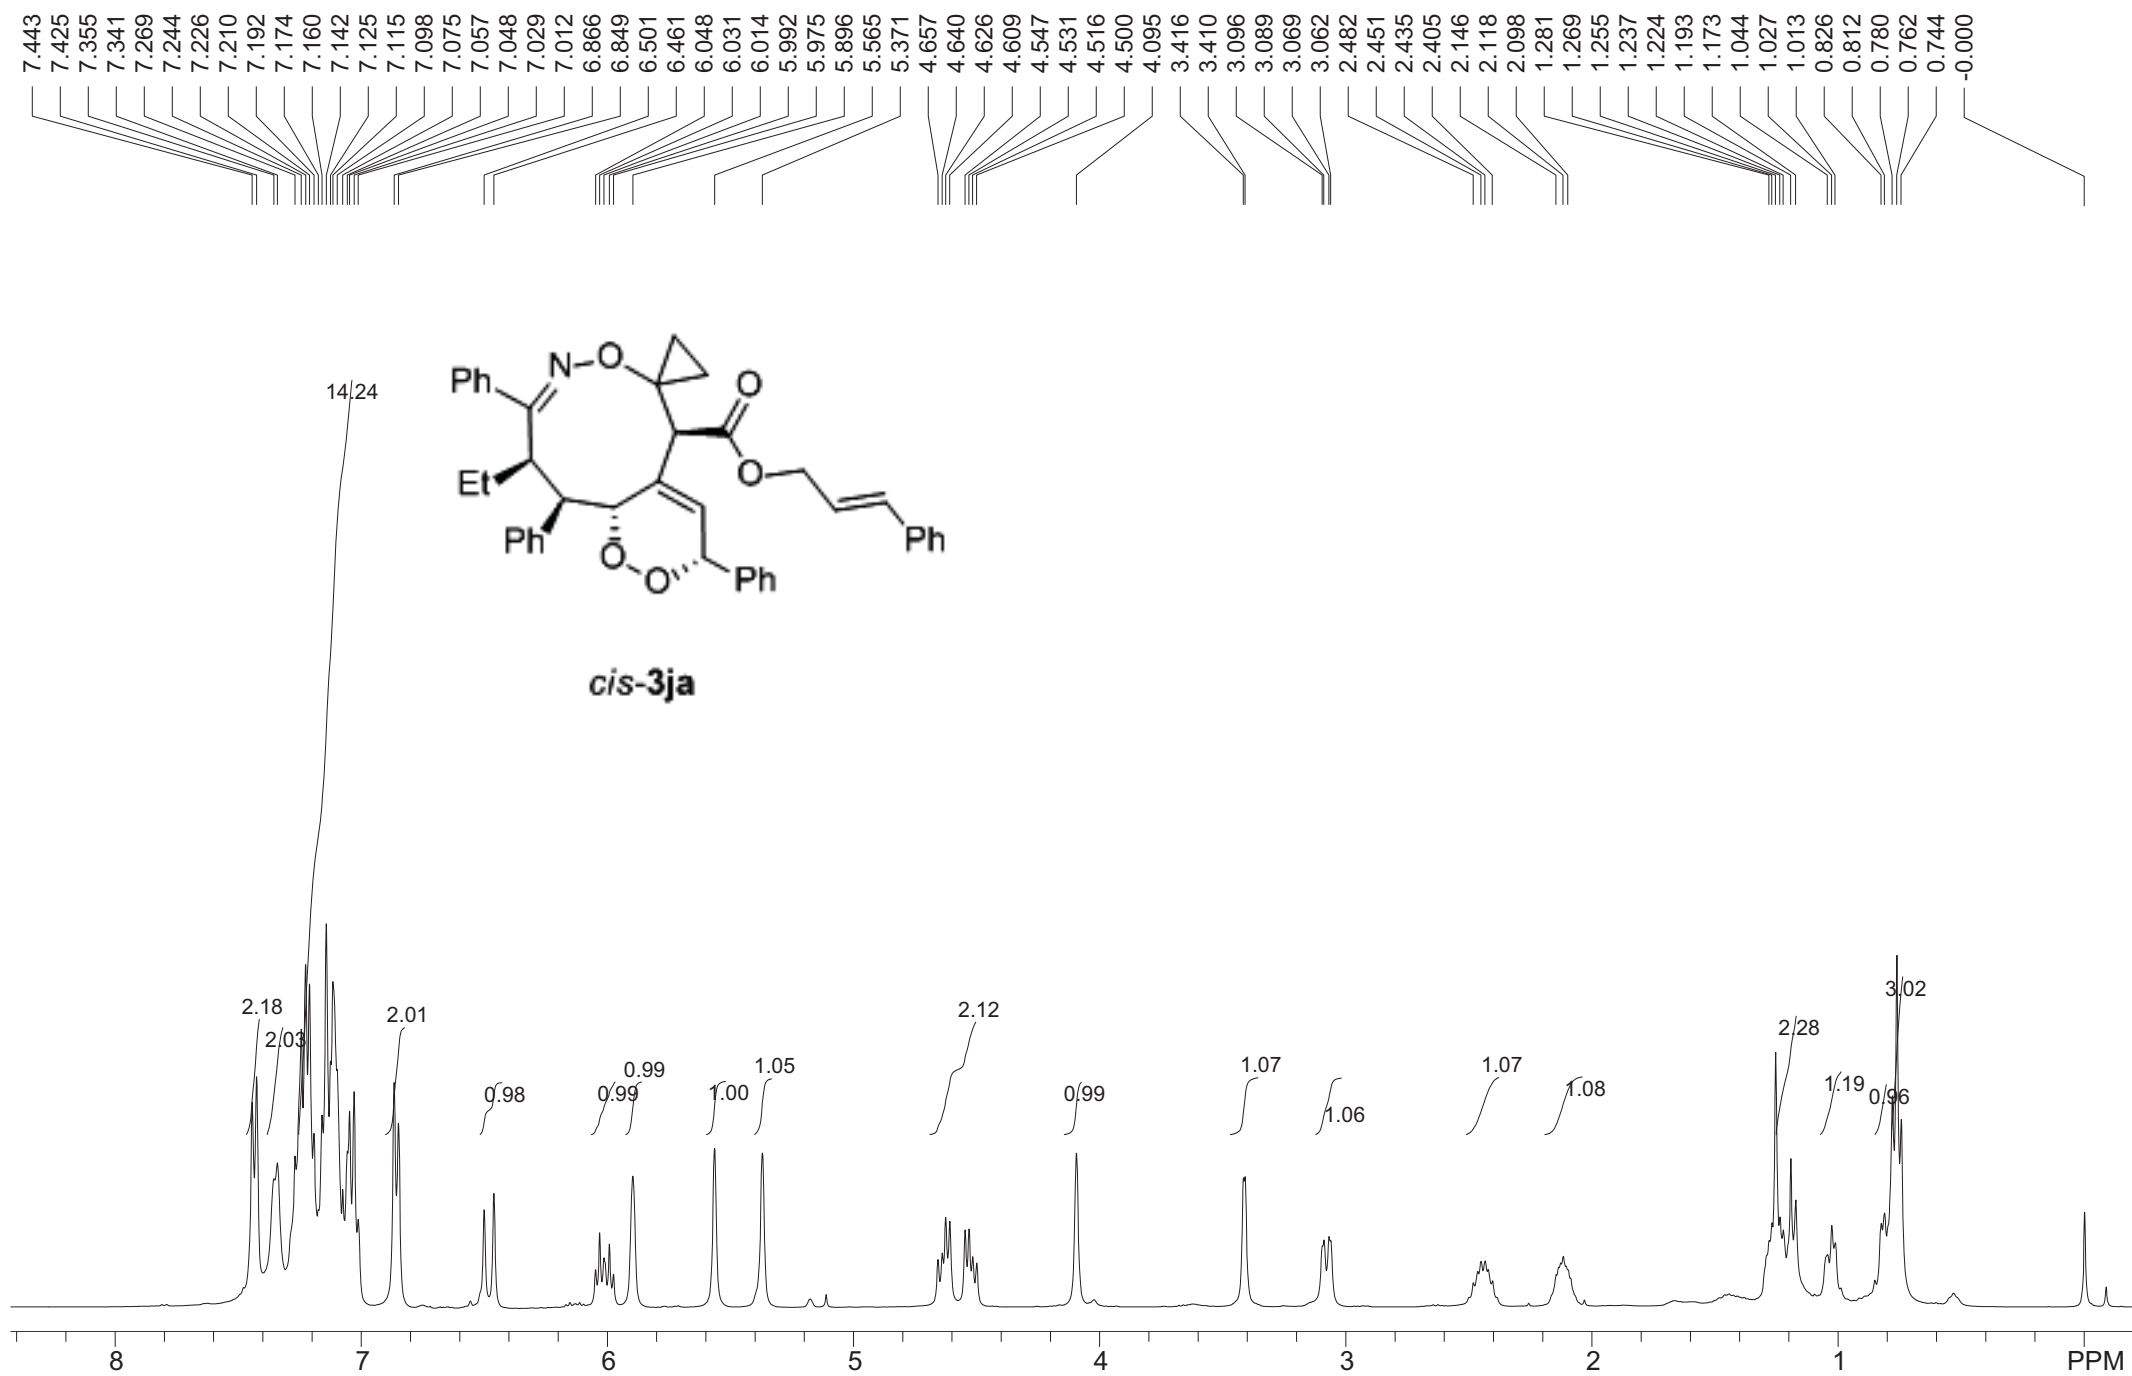



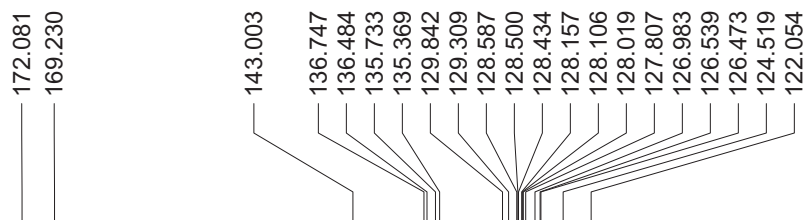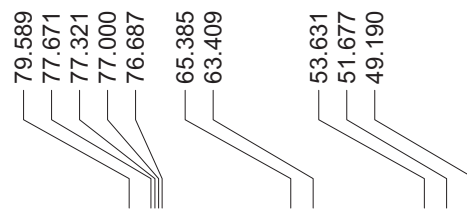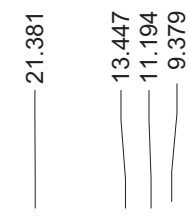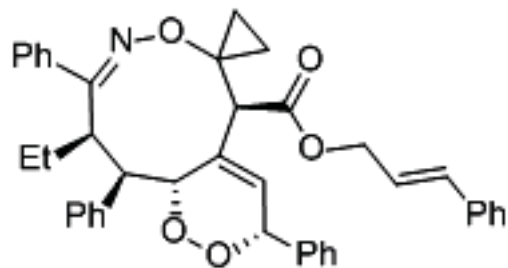

*cis-3ja*

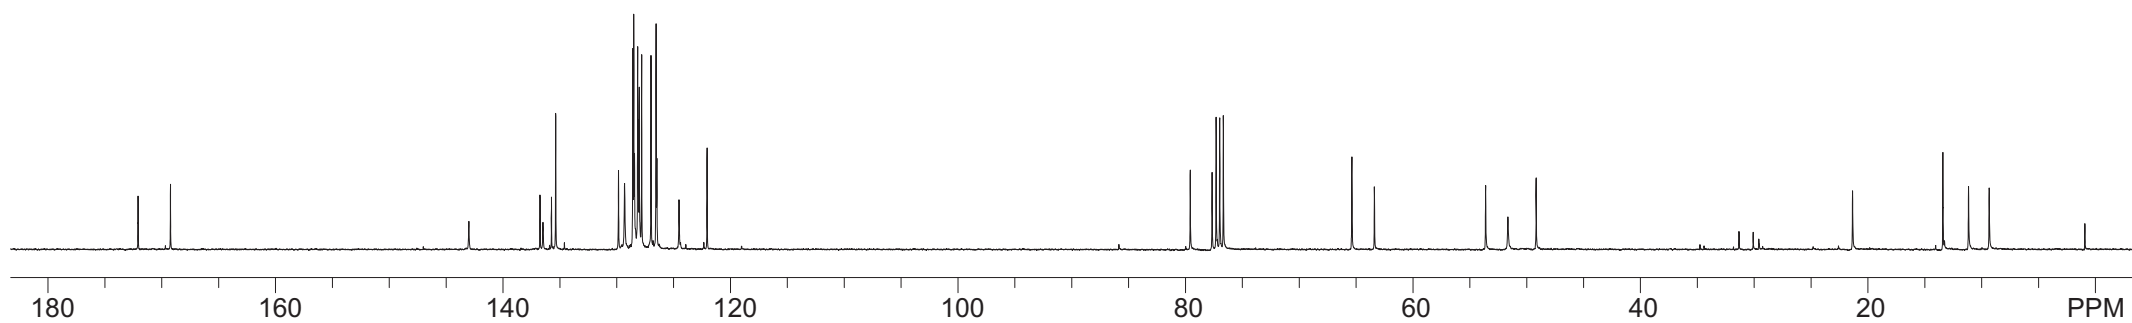

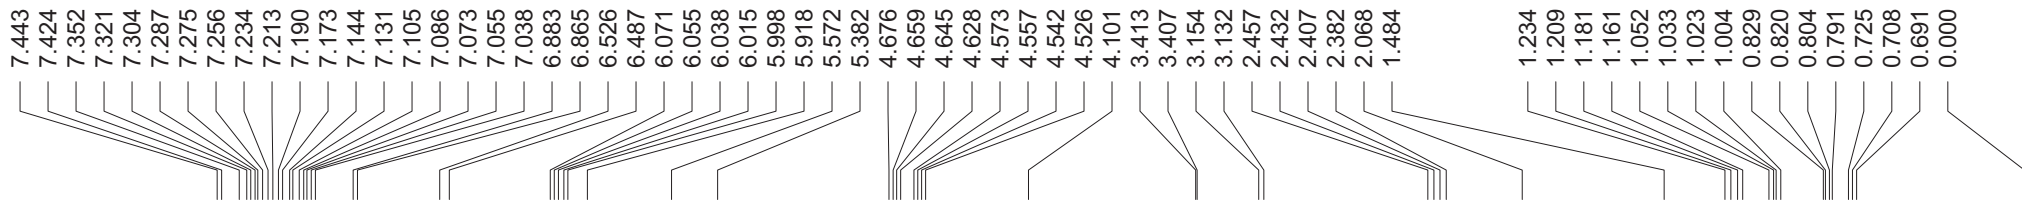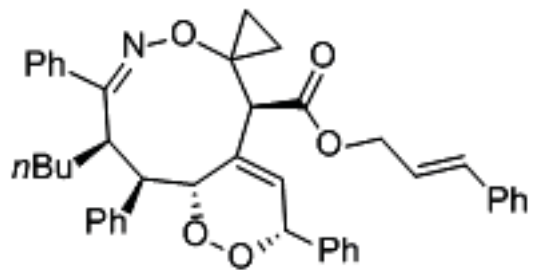

*cis-3ka*

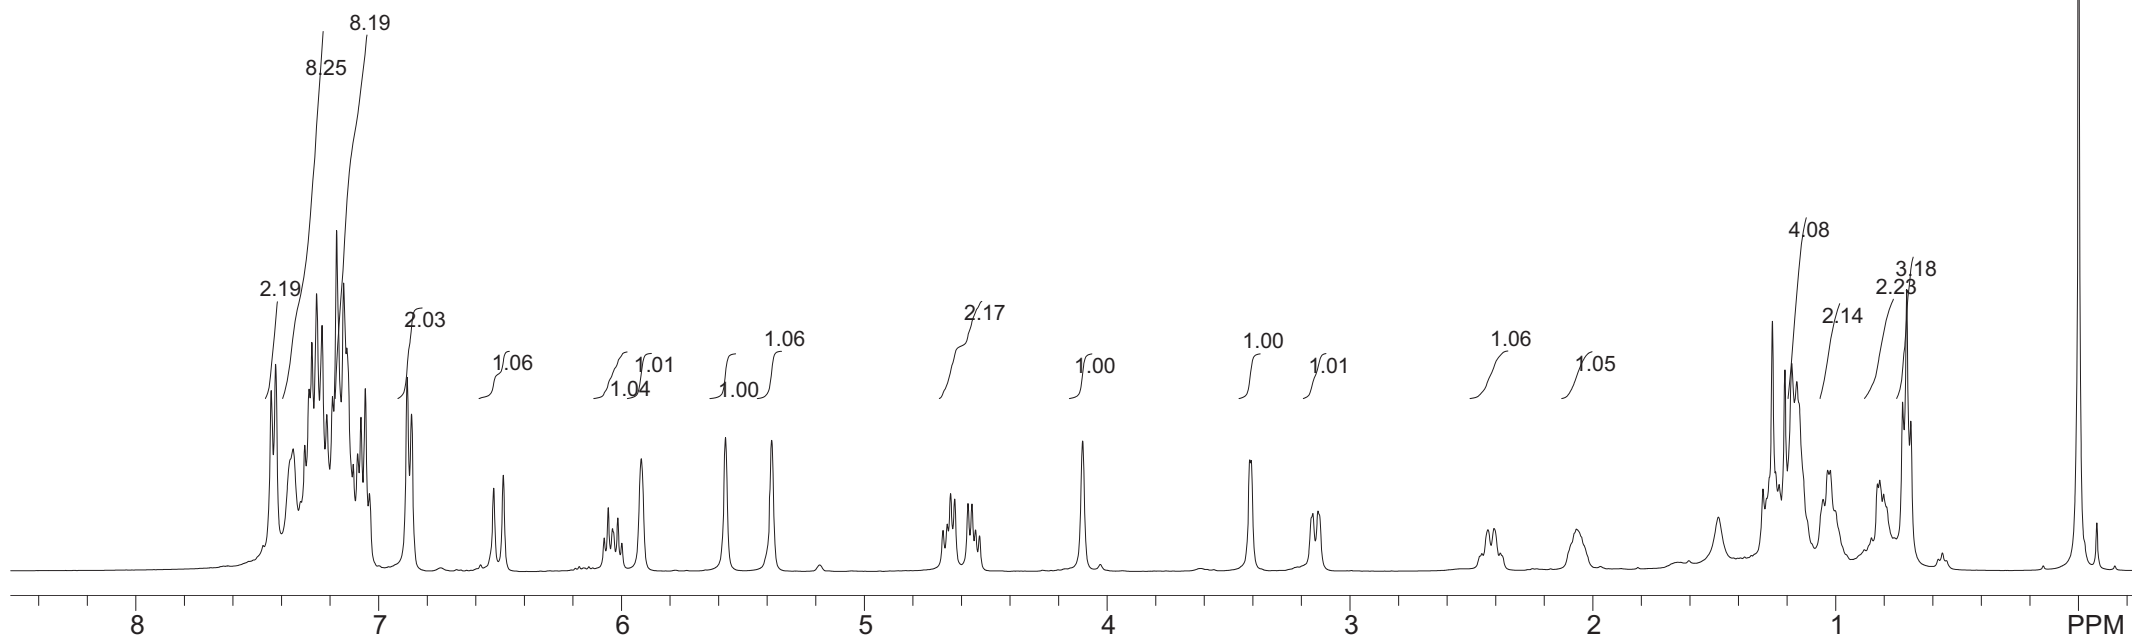

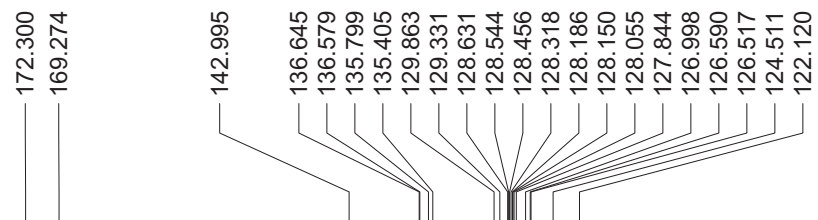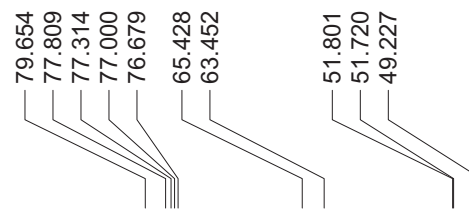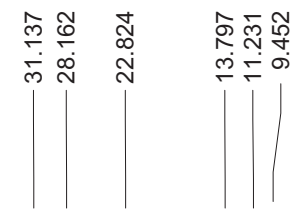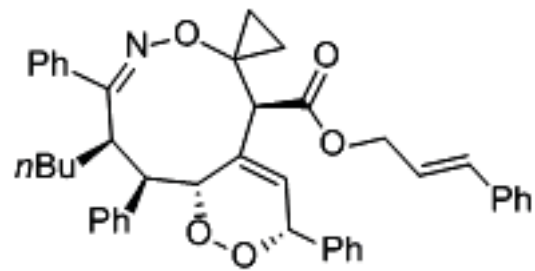

*cis-3ka*

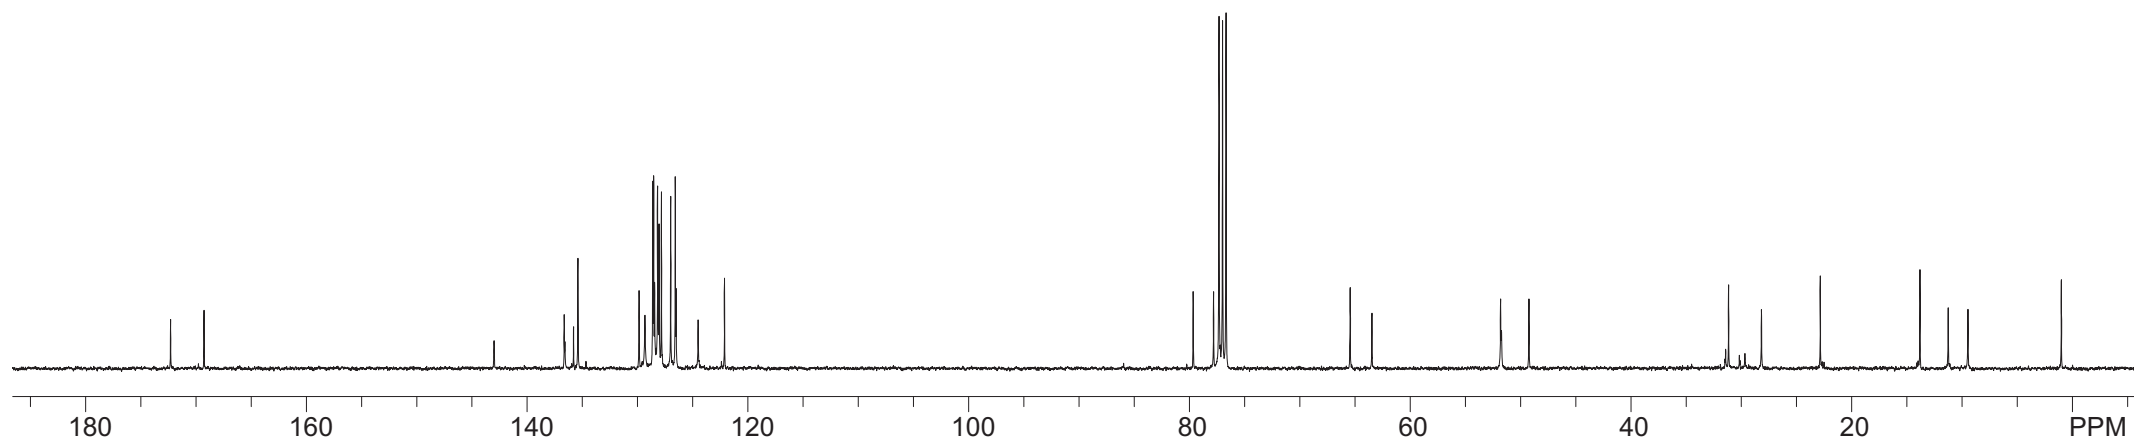

7.437  
7.422  
7.381  
7.367  
7.352  
7.328  
7.309  
7.286  
7.268  
7.259  
6.654  
6.614  
6.495  
6.261  
6.246  
6.230  
6.222  
6.206  
6.191  
5.770

4.799  
4.792  
4.743  
4.728

4.341  
3.924  
3.916  
3.856

2.222  
2.189  
1.926  
1.903  
1.783  
1.757  
1.588  
1.286  
1.255  
1.224  
1.209  
1.150  
1.136  
1.123  
1.109  
0.864  
0.849  
0.837  
0.825  
0.000

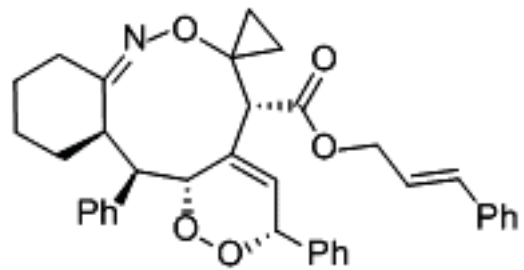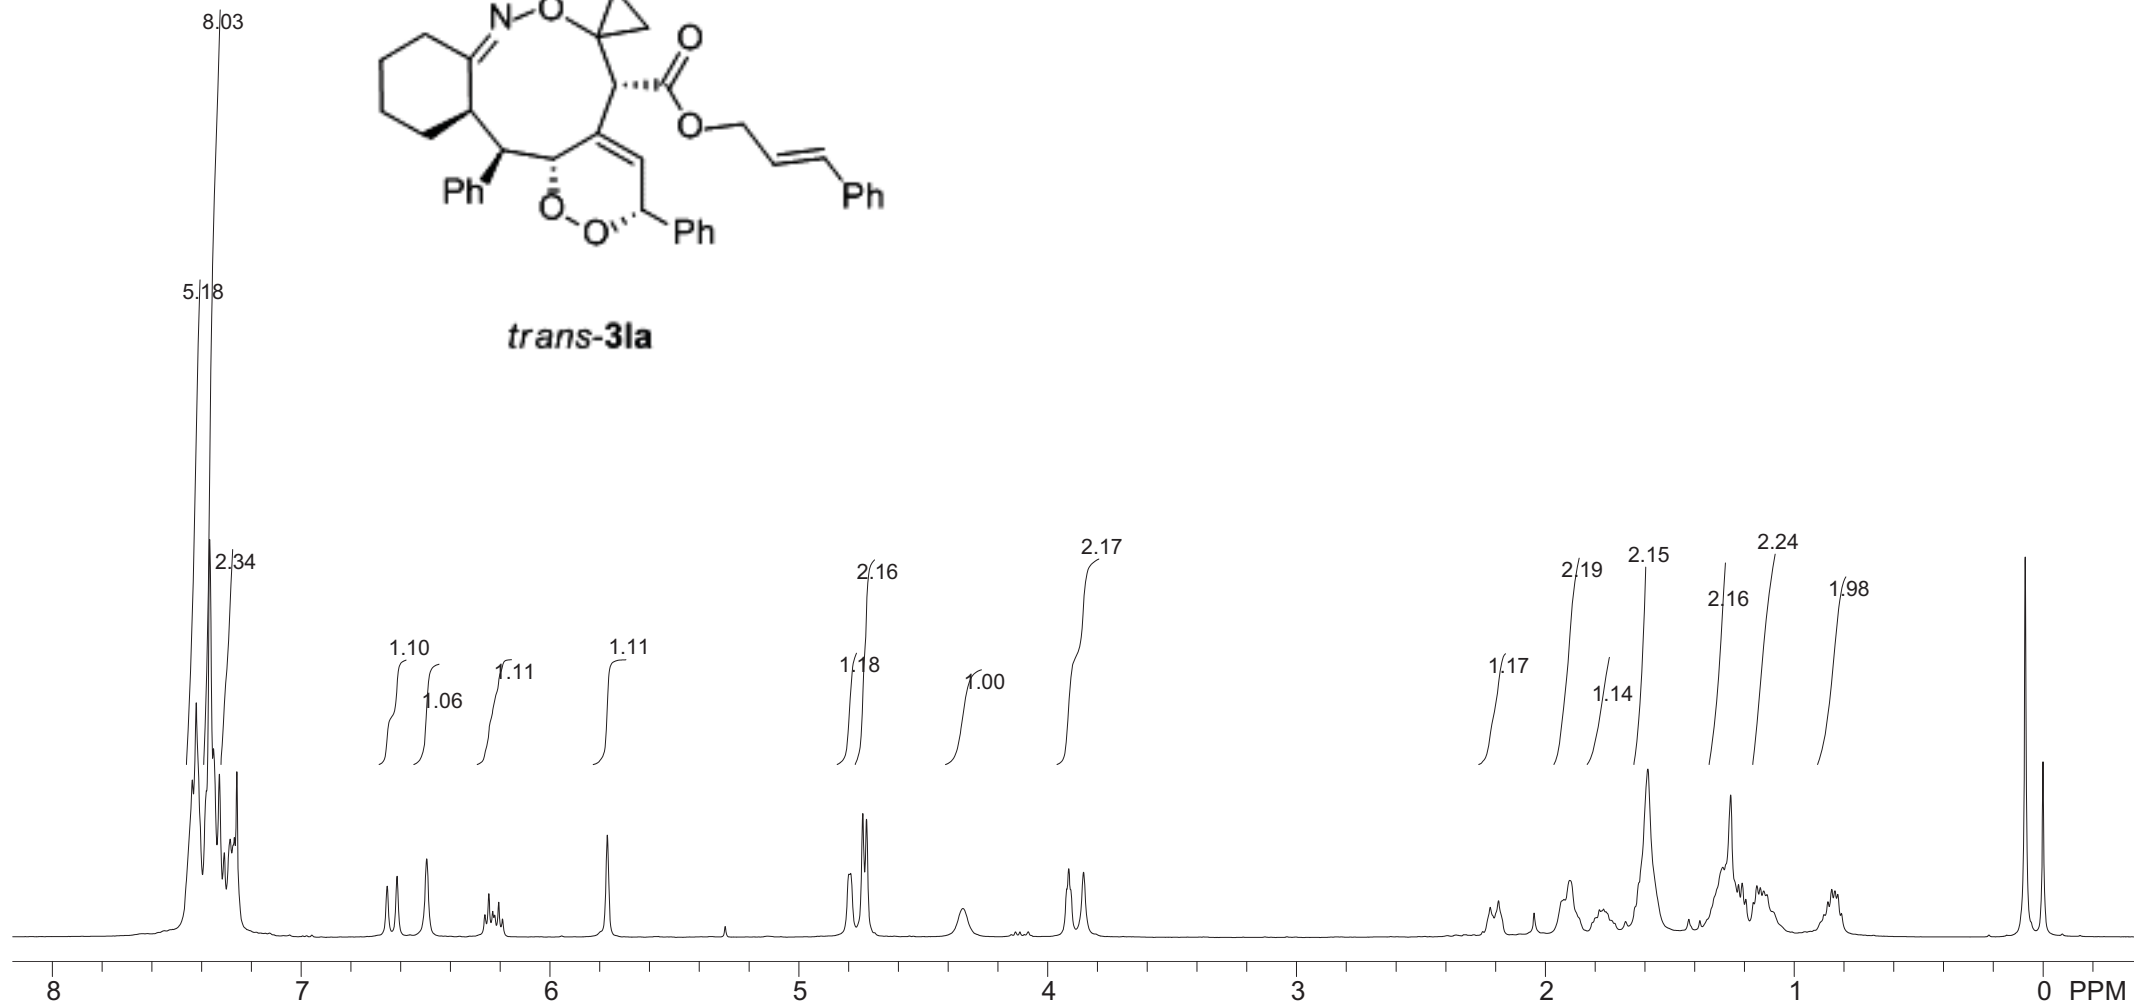

—176.66

—169.81

—142.87

135.99

135.49

134.88

134.38

130.57

129.54

129.27

128.93

128.62

128.59

128.16

128.05

127.05

126.62

122.38

—87.93

81.35

77.21

77.00

76.79

~65.54

~63.01

~60.68

—48.23

37.34

34.17

31.55

27.17

22.09

10.52

10.42

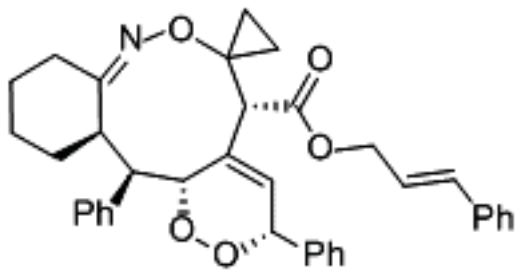

*trans-3la*

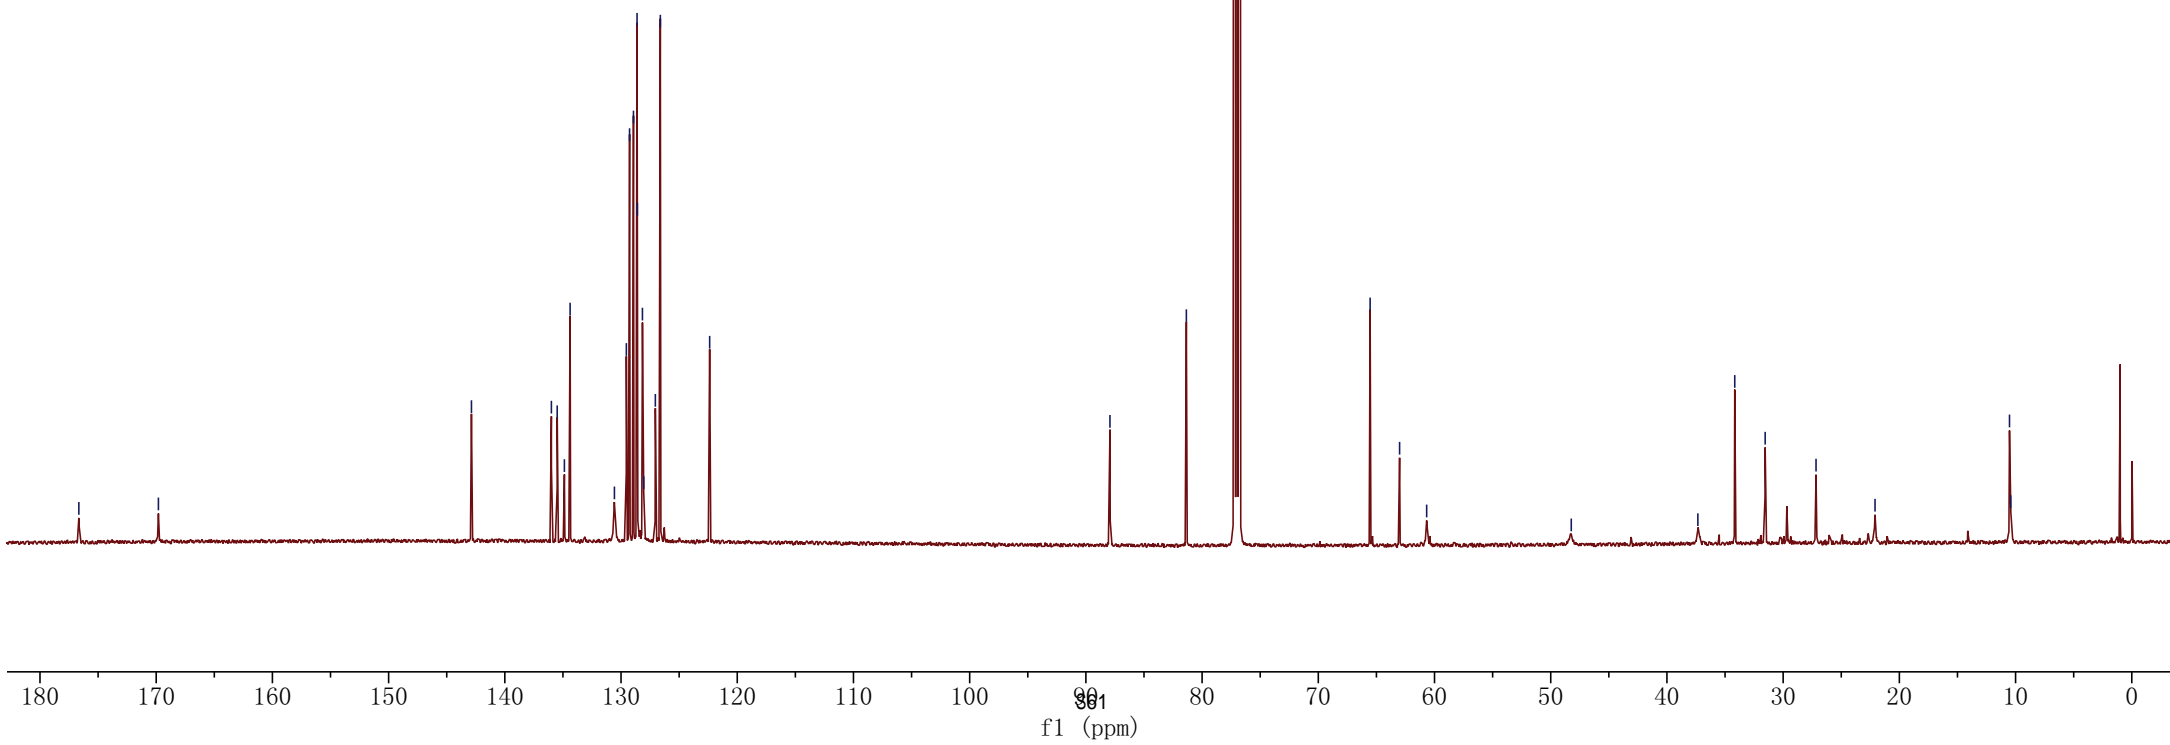

COSY

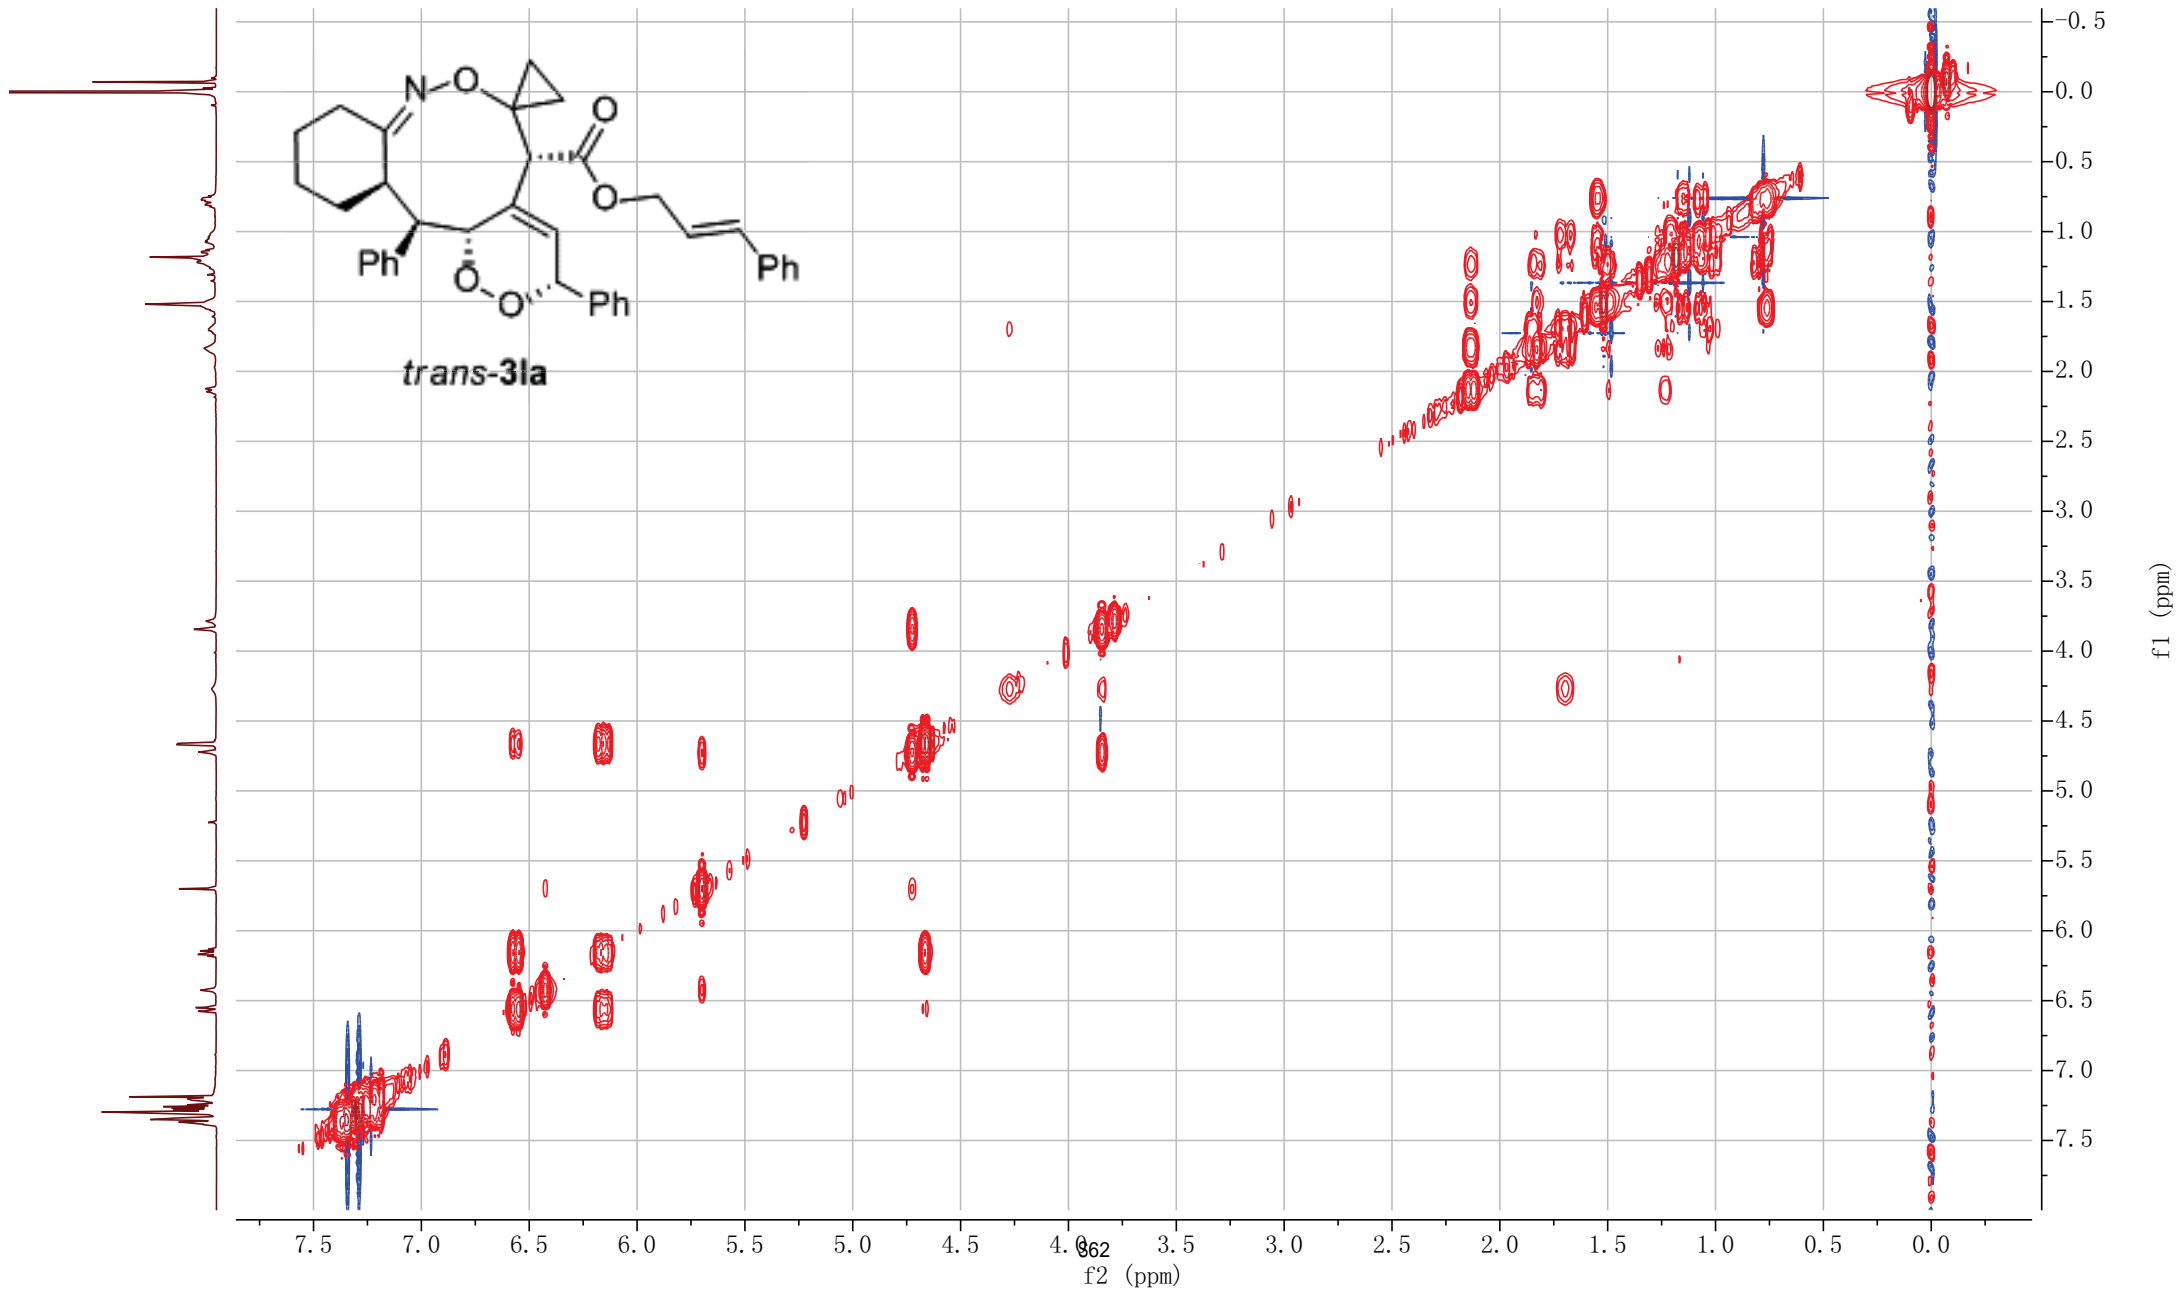

# HMBC

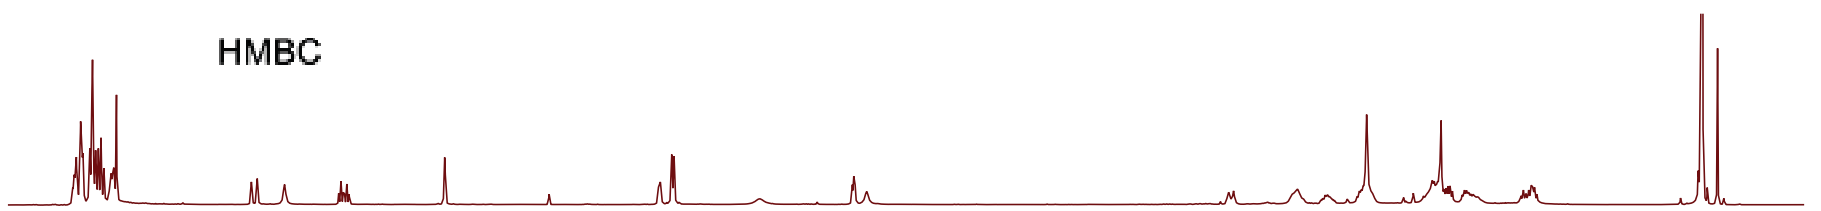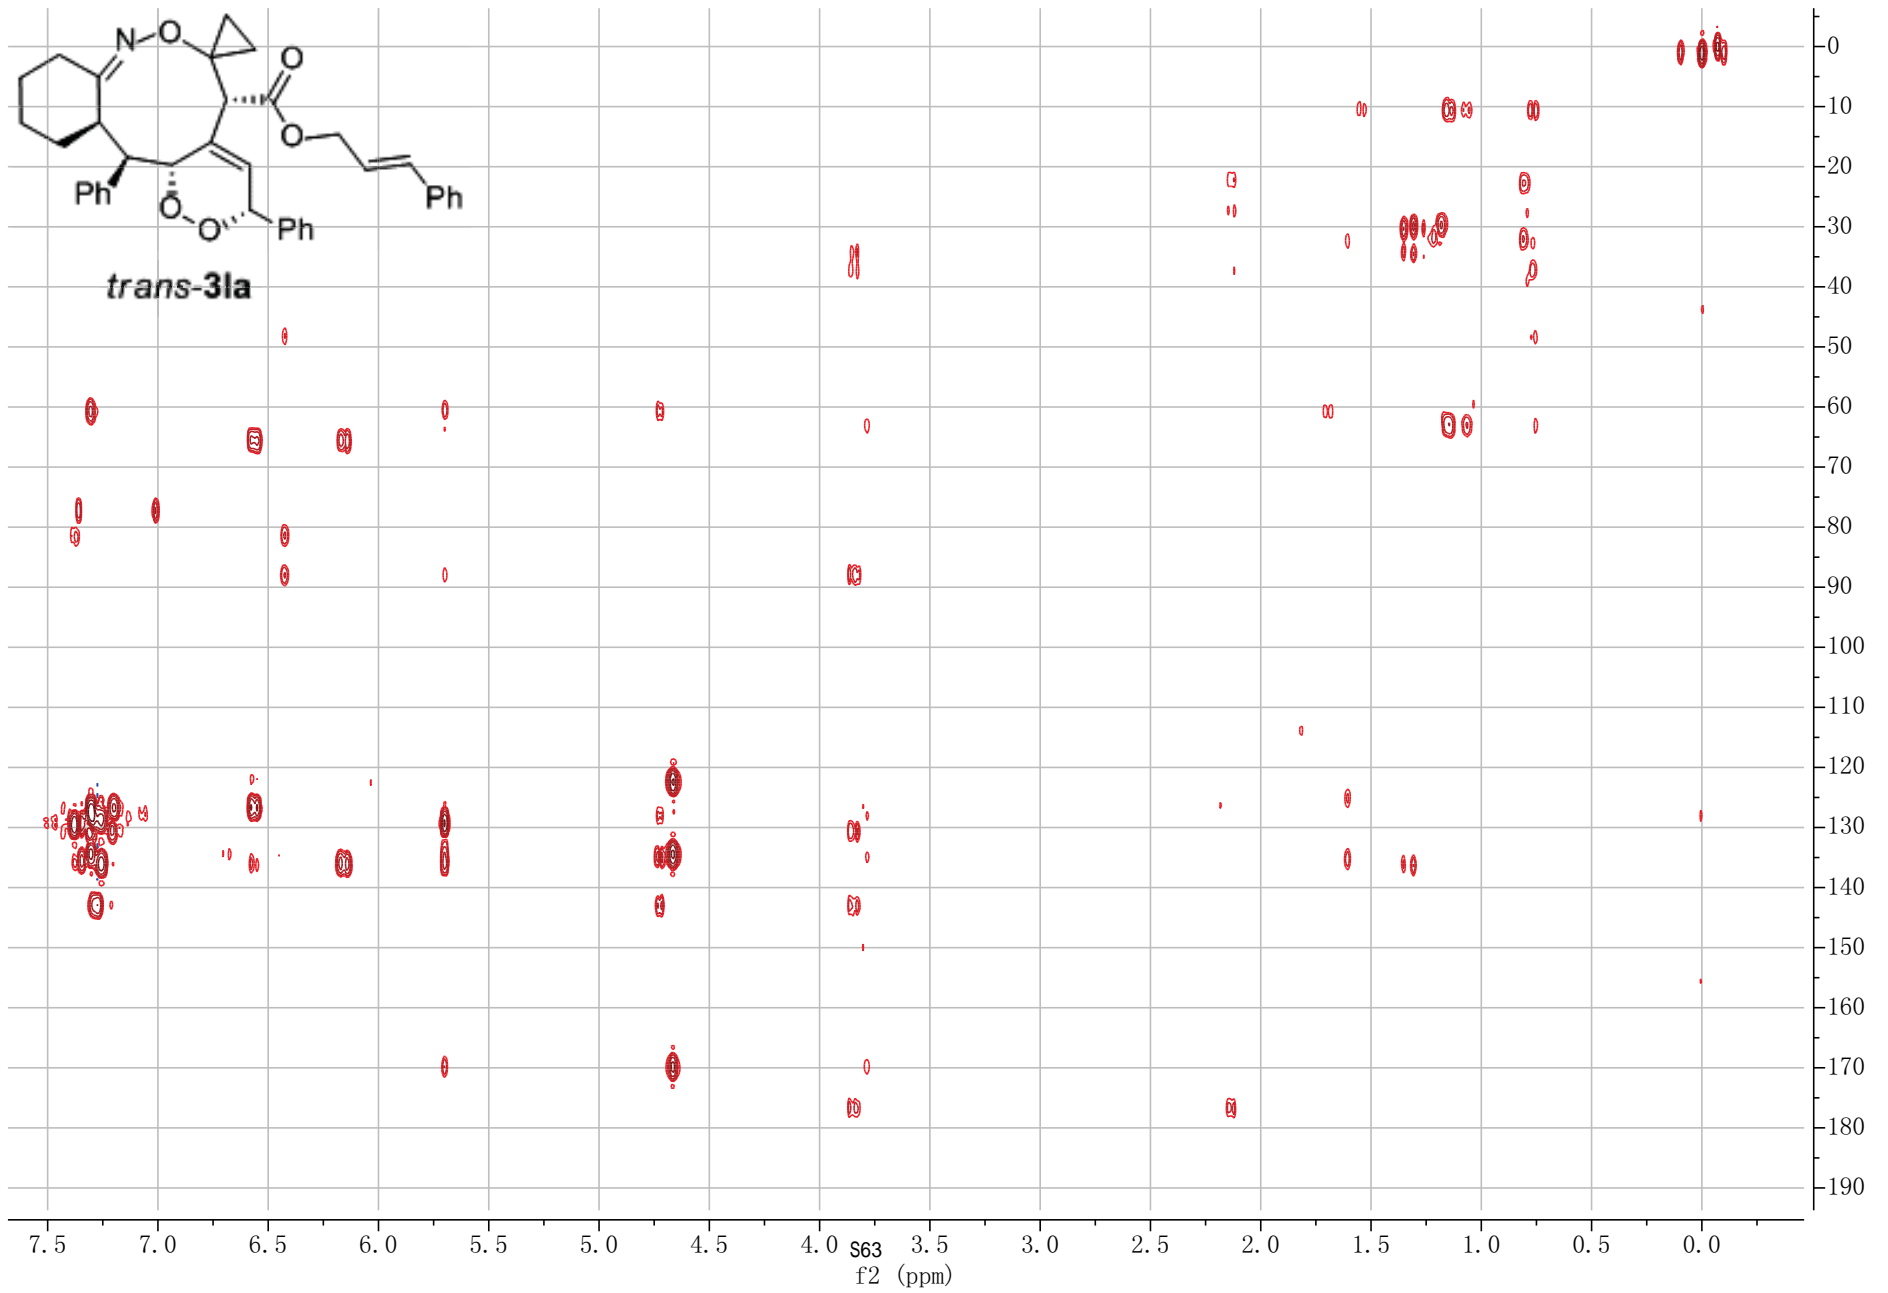

# HMQC

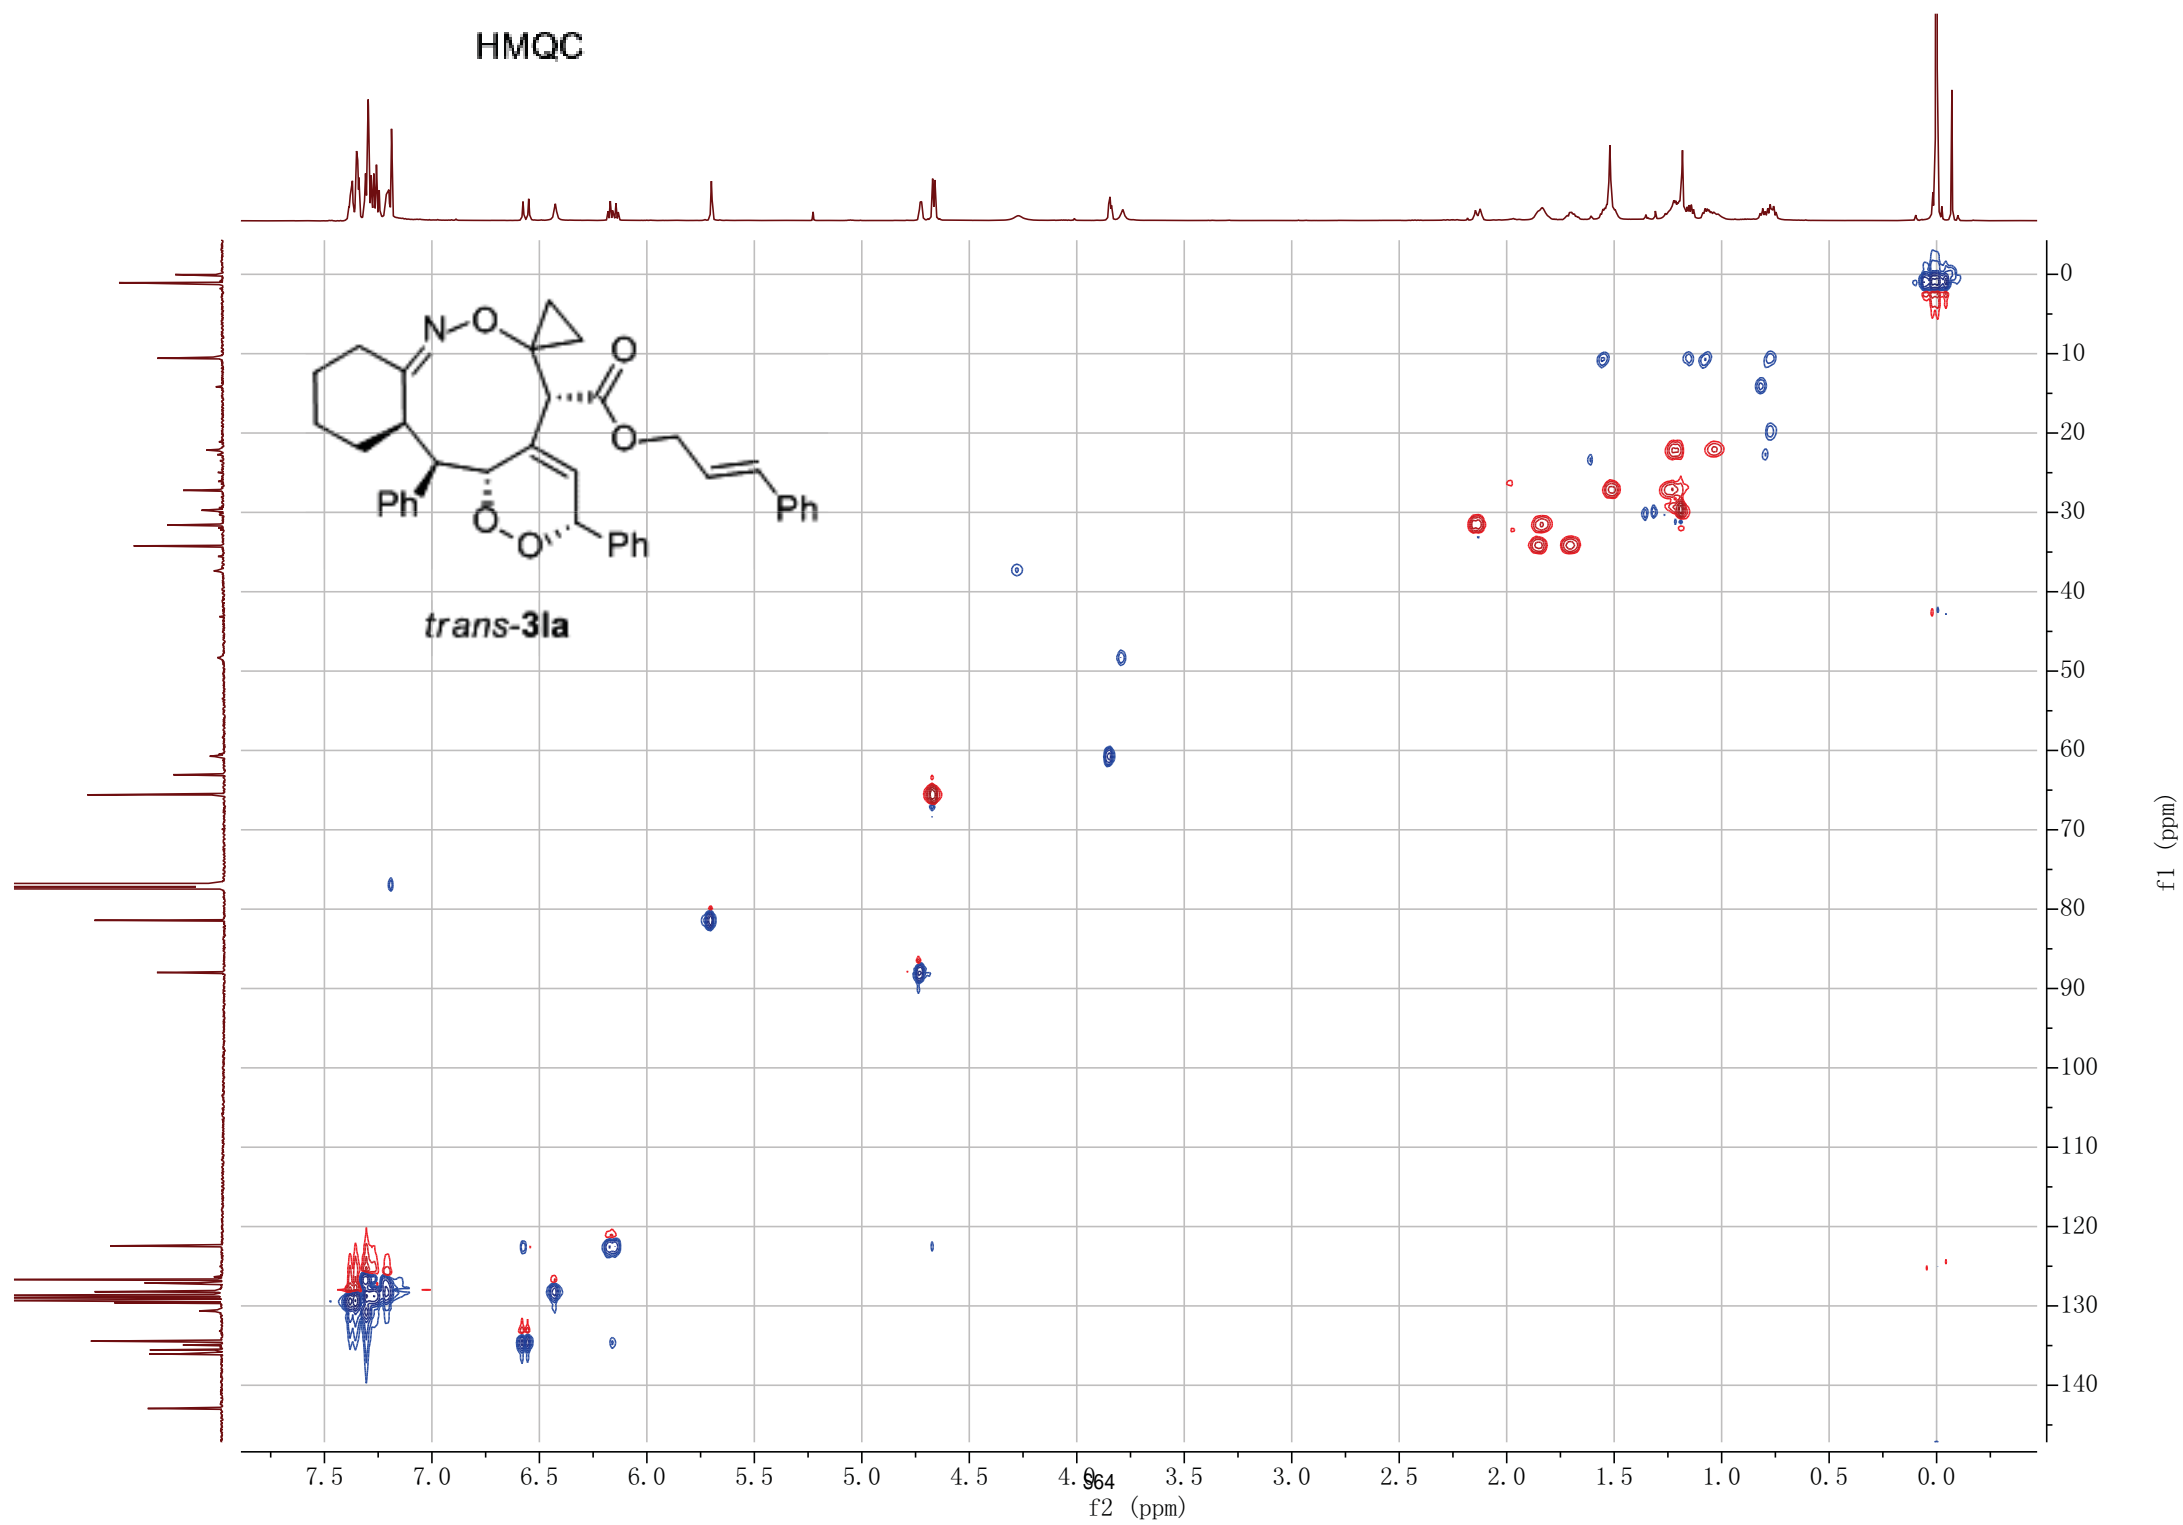



# NOESY

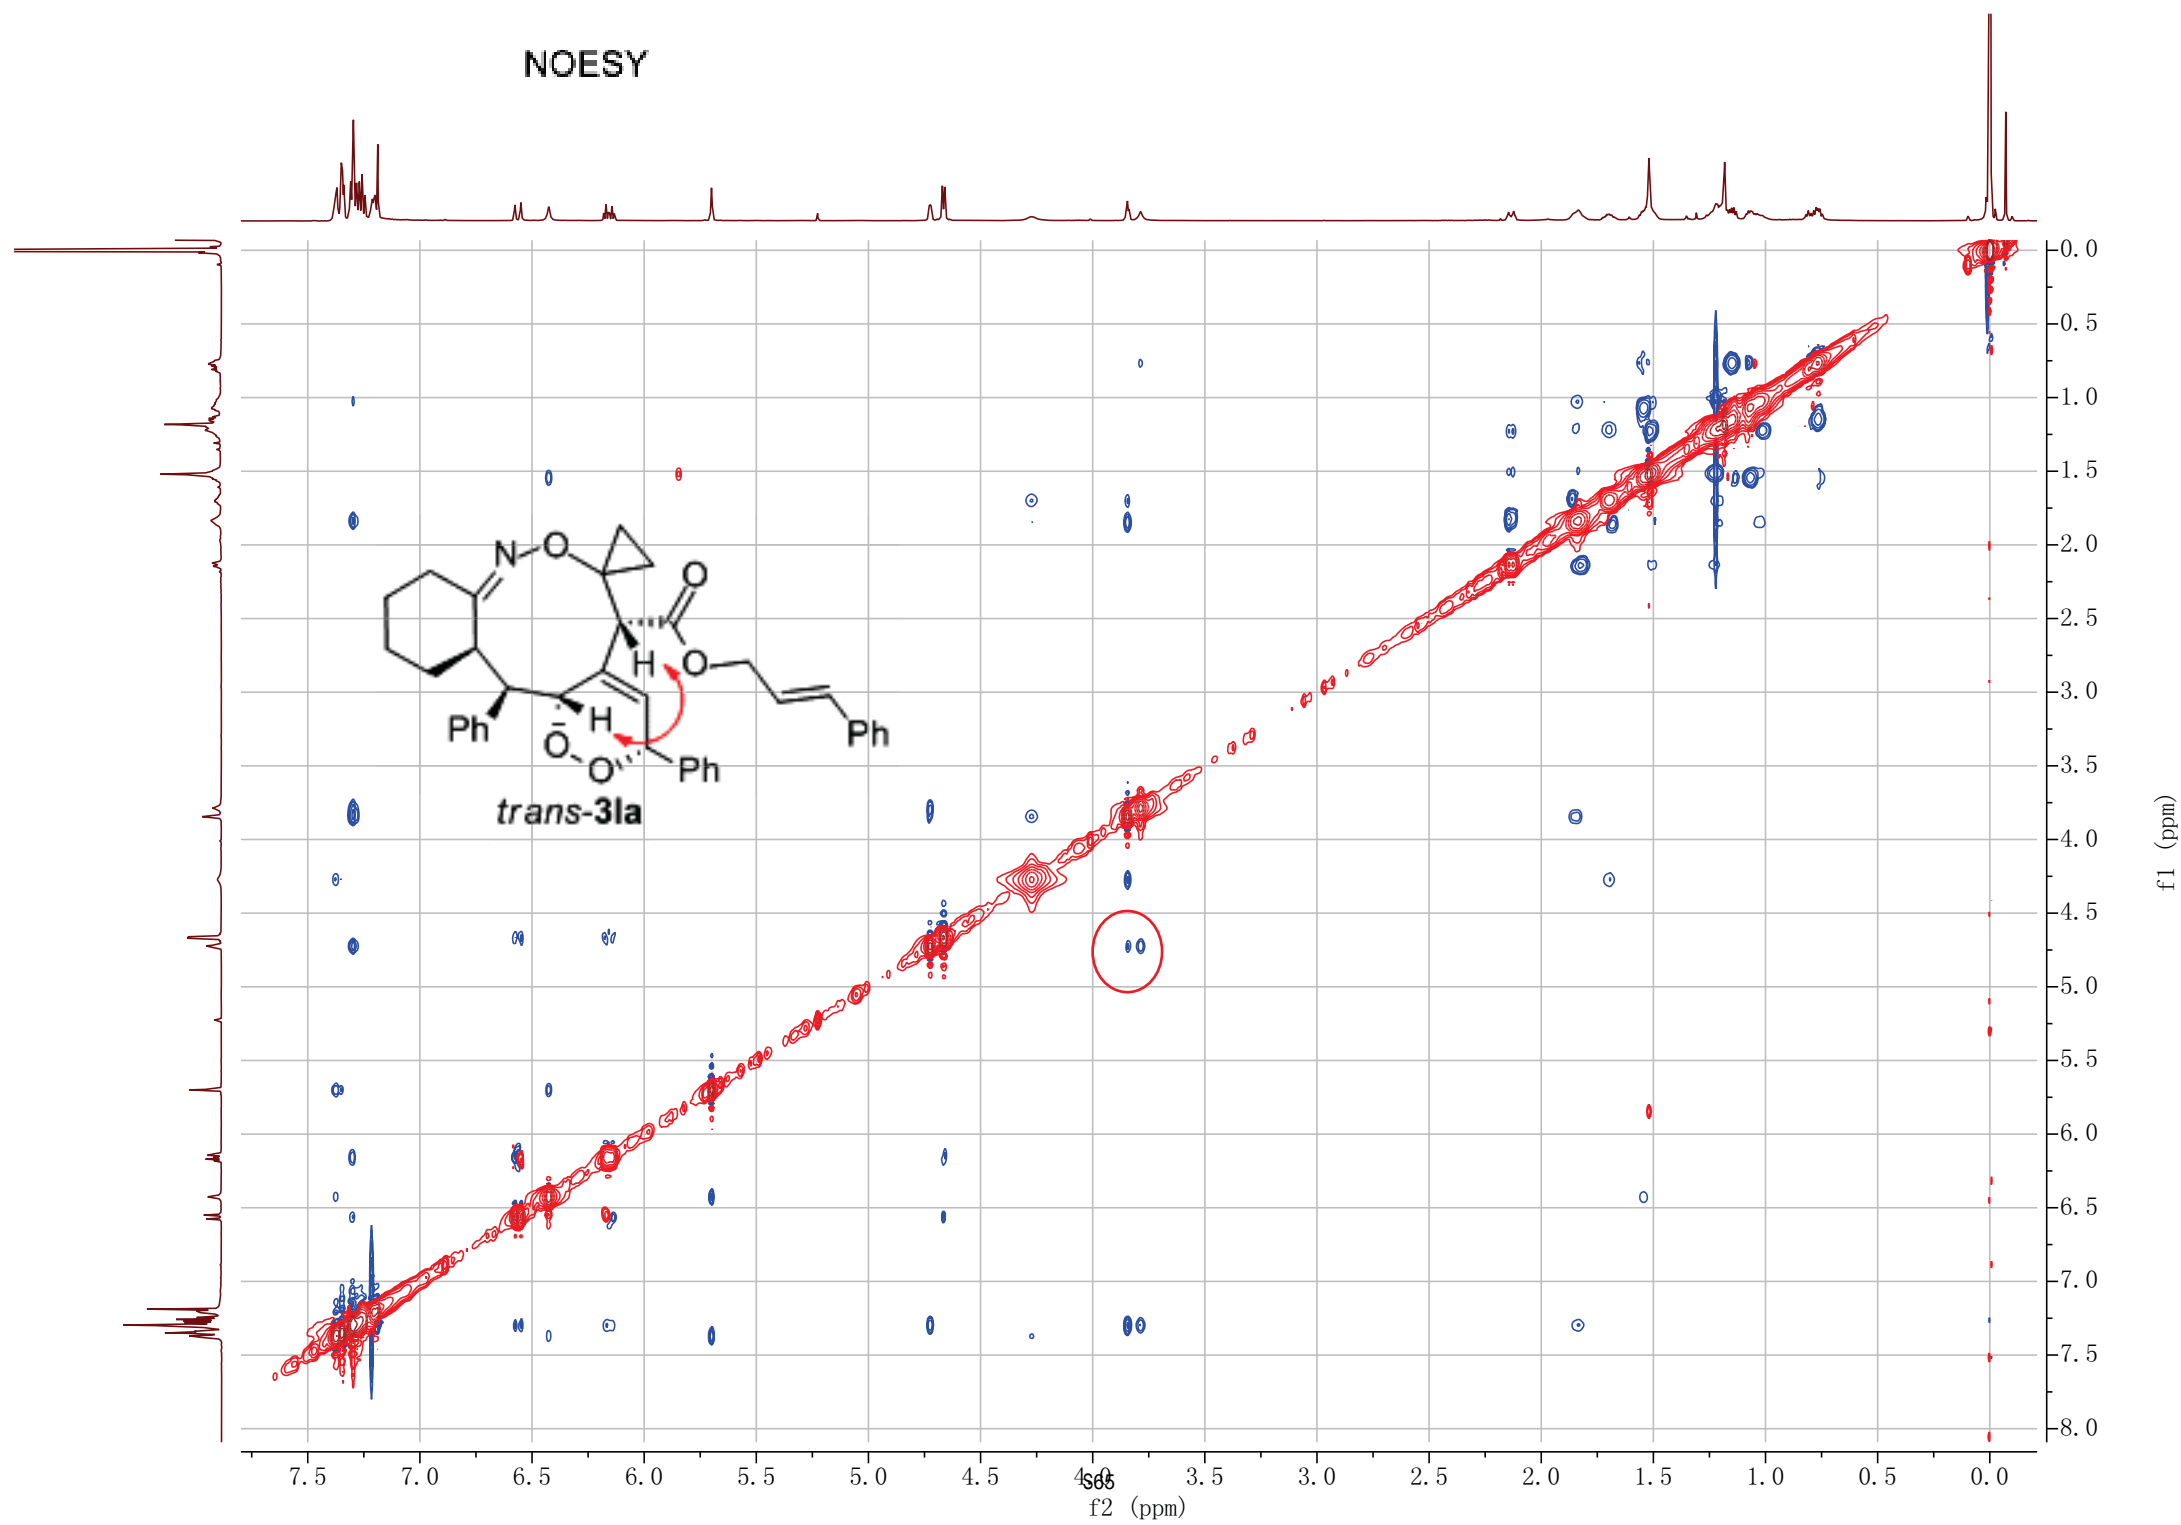

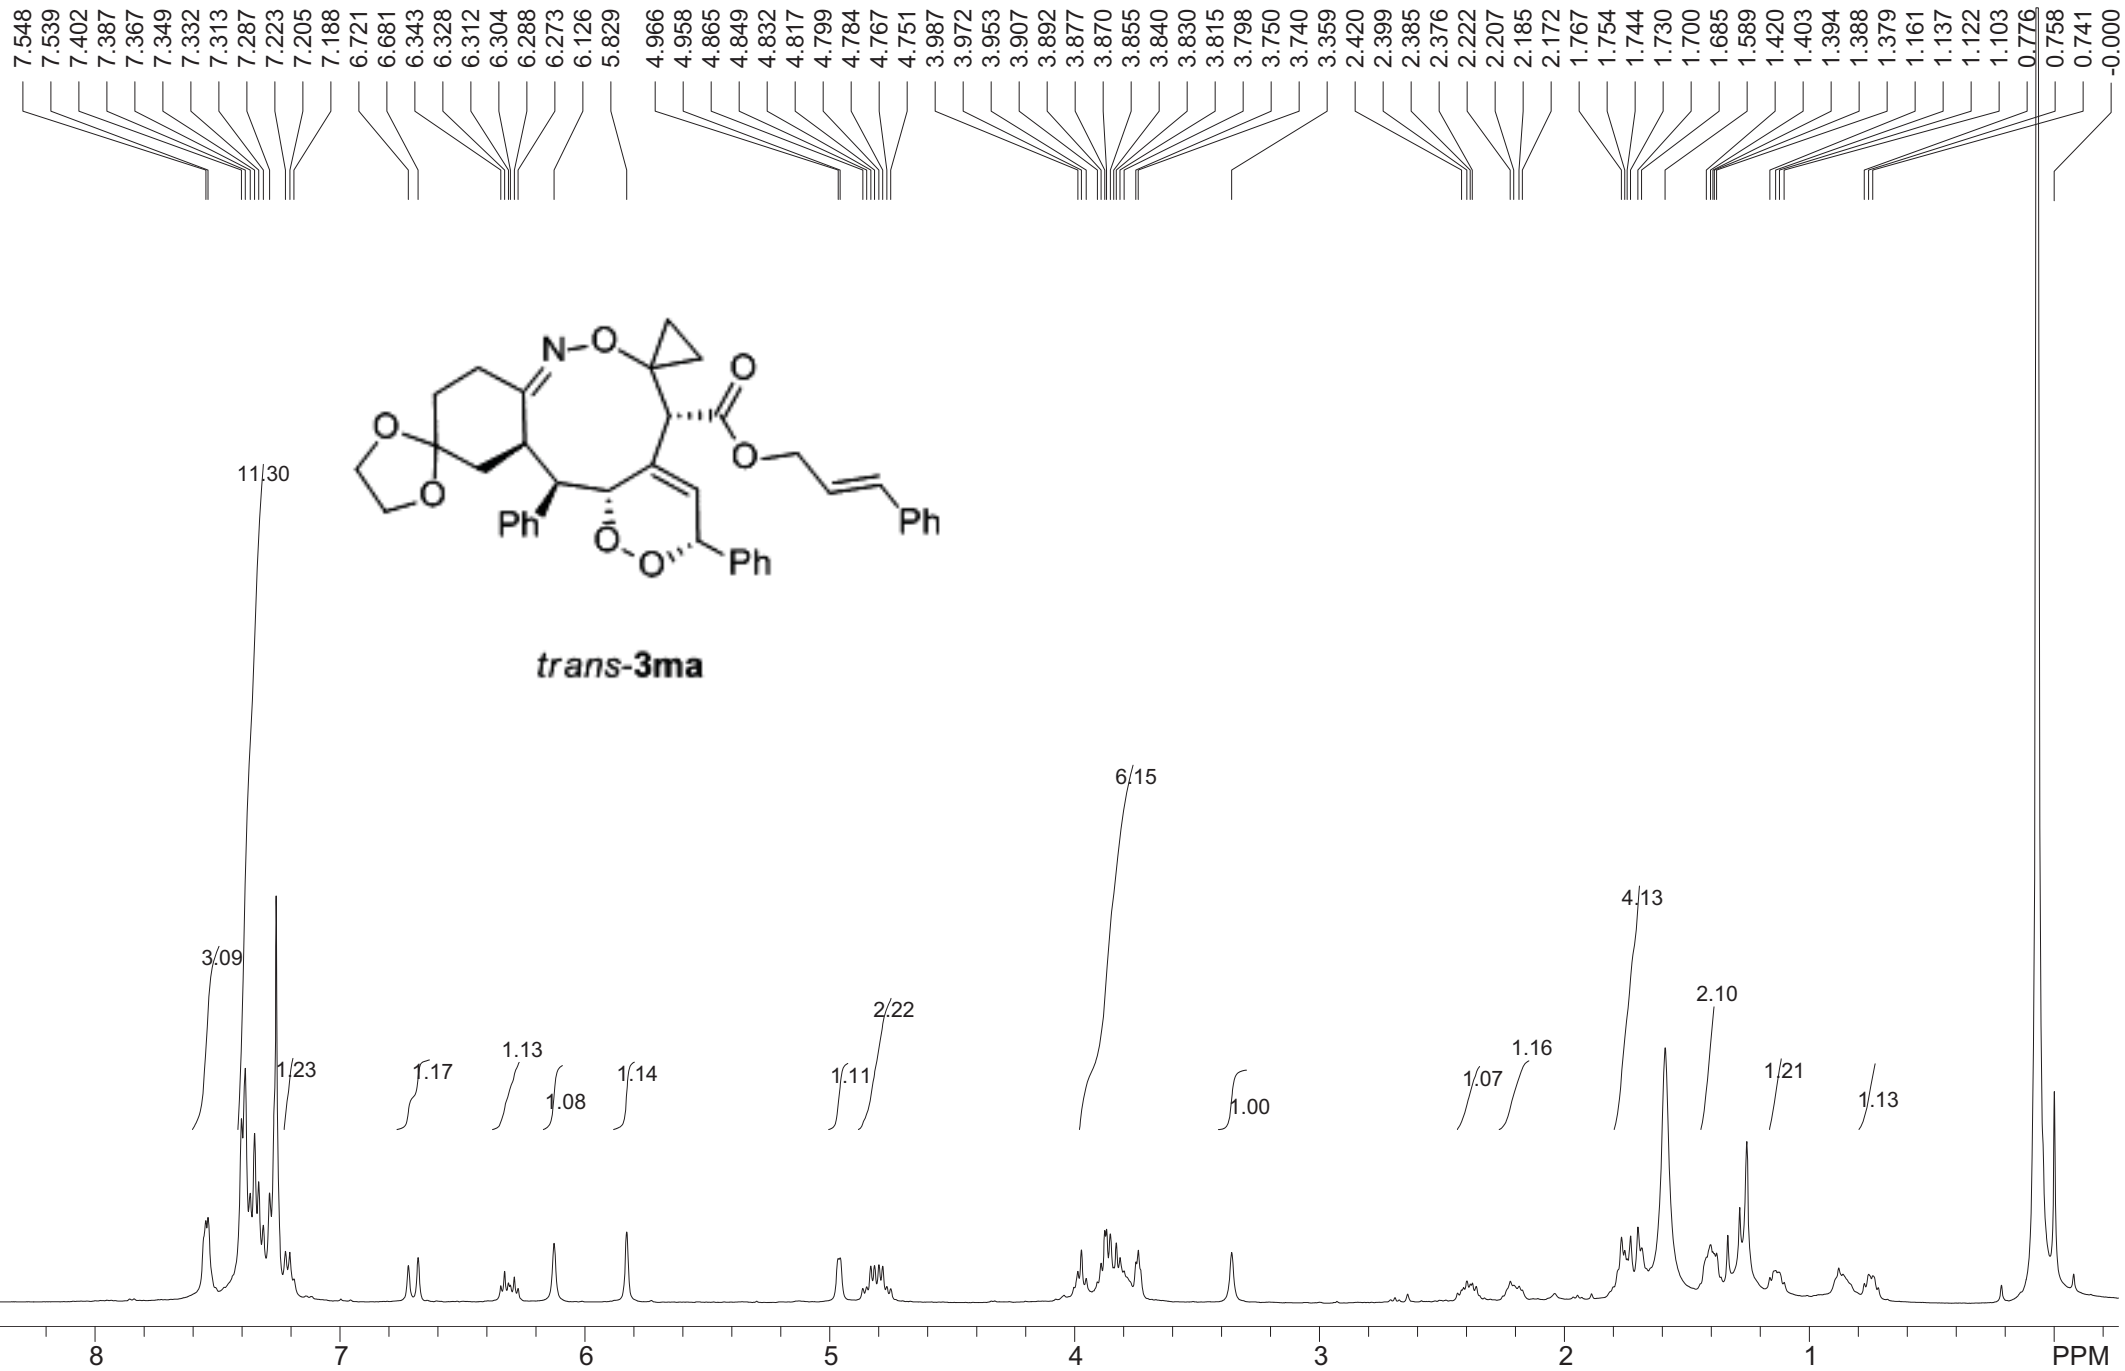

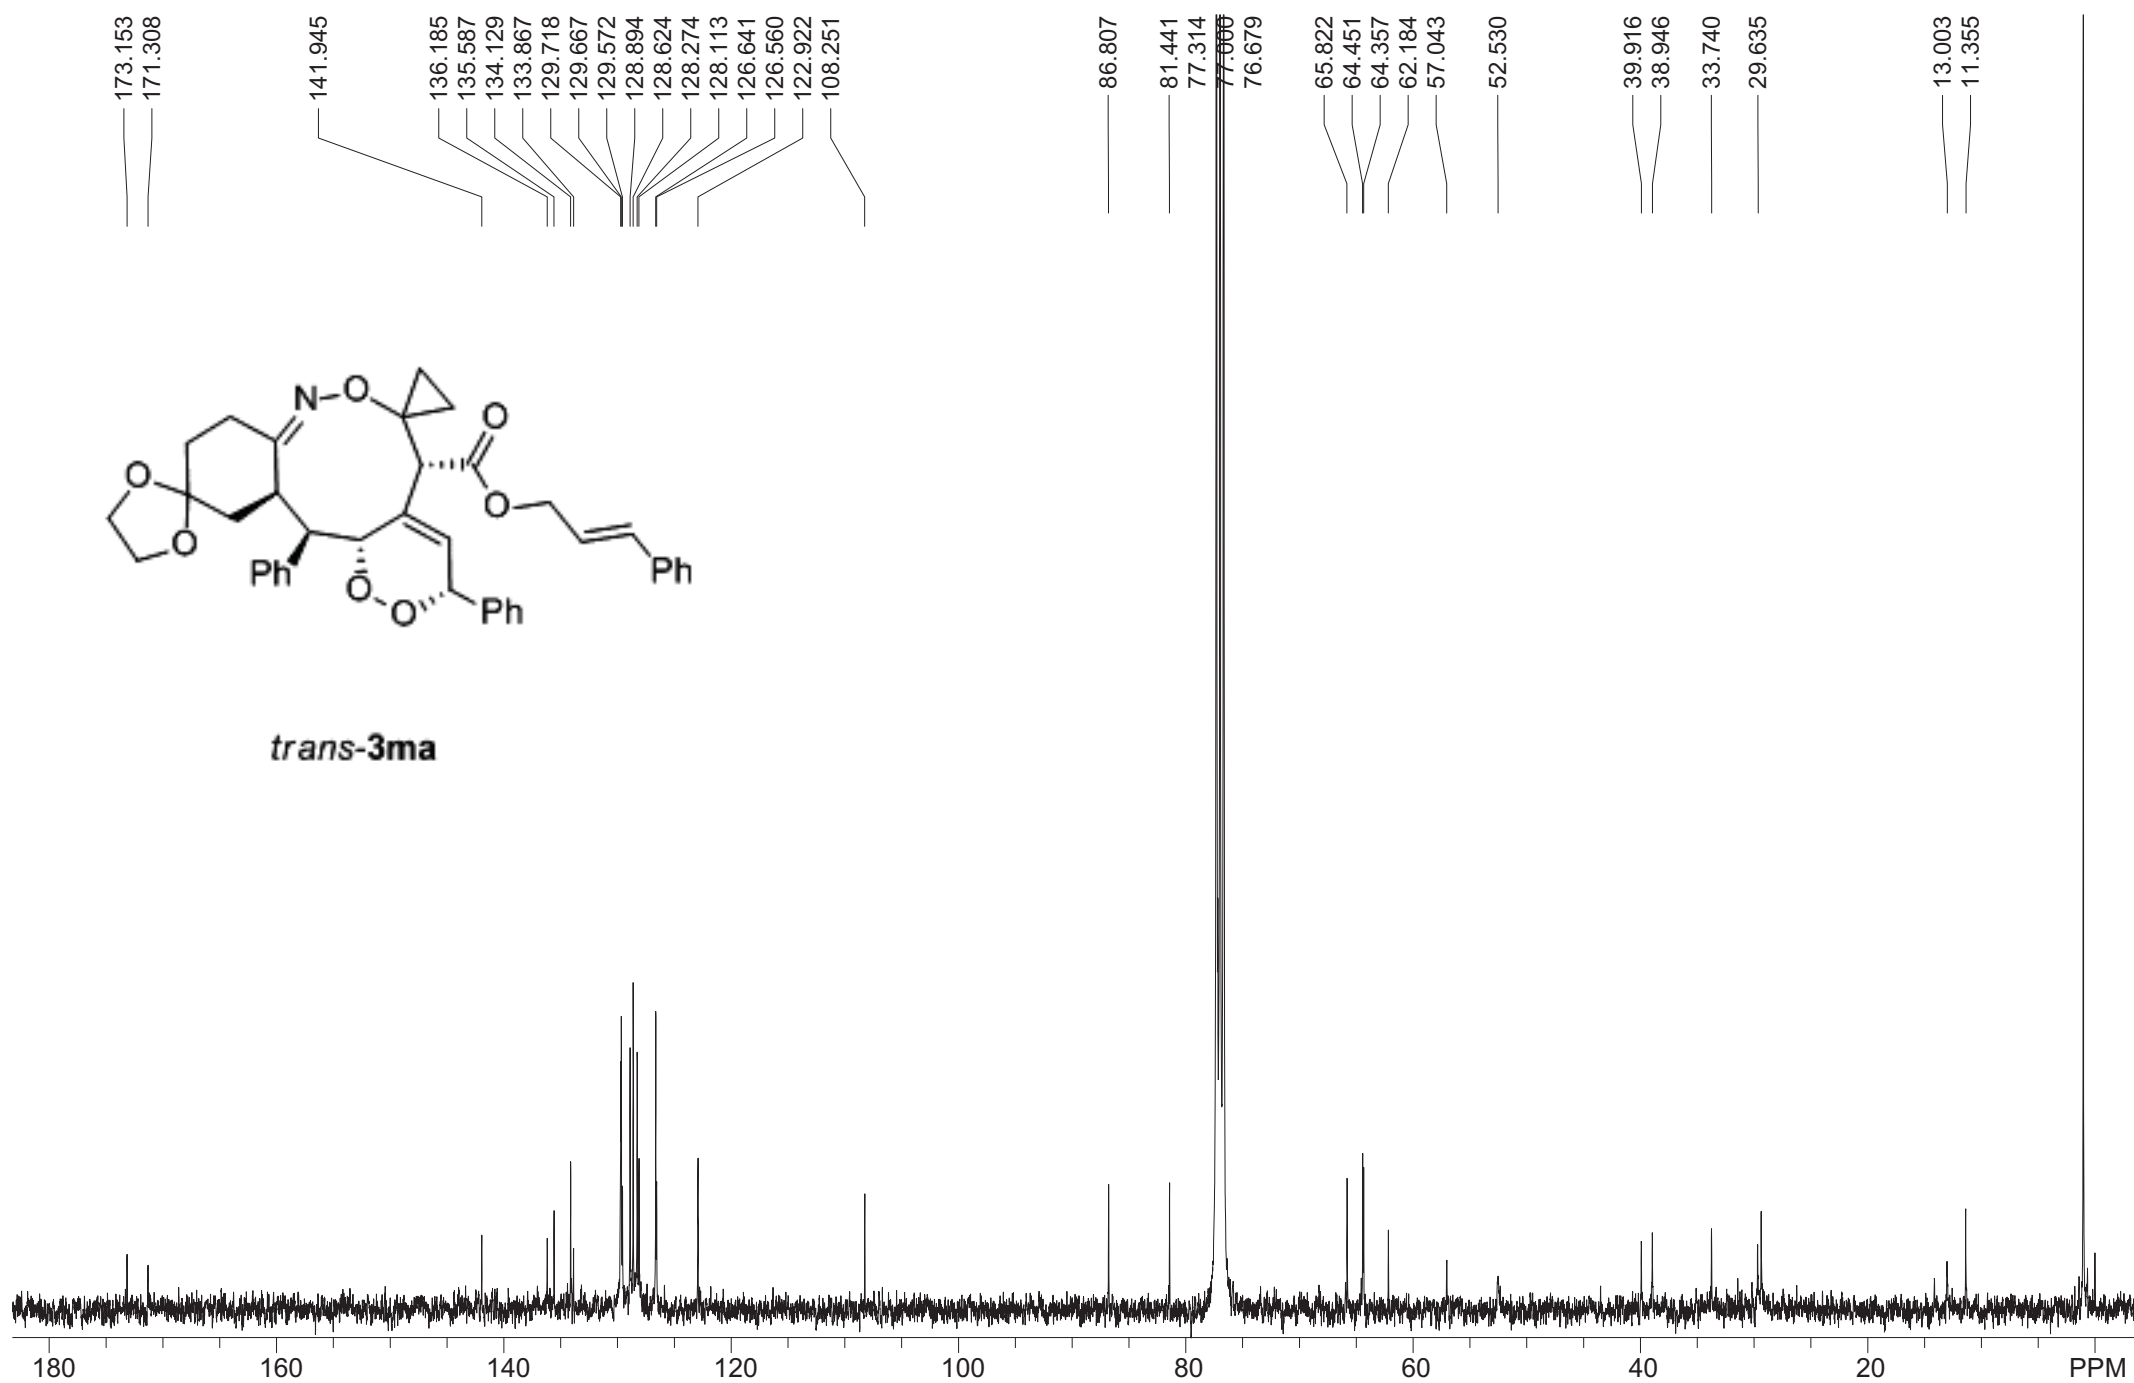

7.411  
7.392  
7.358  
7.314  
7.308  
7.302  
7.293  
7.283  
7.273  
7.255  
7.238  
7.221  
6.674  
6.634  
6.262  
6.246  
6.229  
6.223  
6.206  
6.190  
5.802  
5.201  
5.186  
4.779  
4.744  
4.730  
4.694  
4.069  
4.052  
4.029  
3.880  
3.866  
3.850  
3.837  
3.749  
3.740  
3.734  
3.724  
3.503  
3.484  
3.475  
3.466  
3.457  
3.438  
3.271  
3.243  
3.215  
3.080  
3.068  
3.056  
3.043  
2.662  
2.651  
2.644  
2.634  
1.258  
1.236  
1.222  
1.204  
1.067  
1.053  
1.039  
1.026  
0.672  
0.663  
0.656  
0.647  
0.632  
0.000

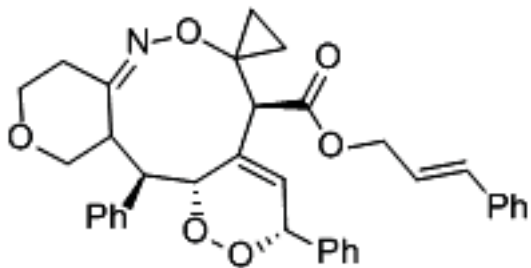

*cis-3na*

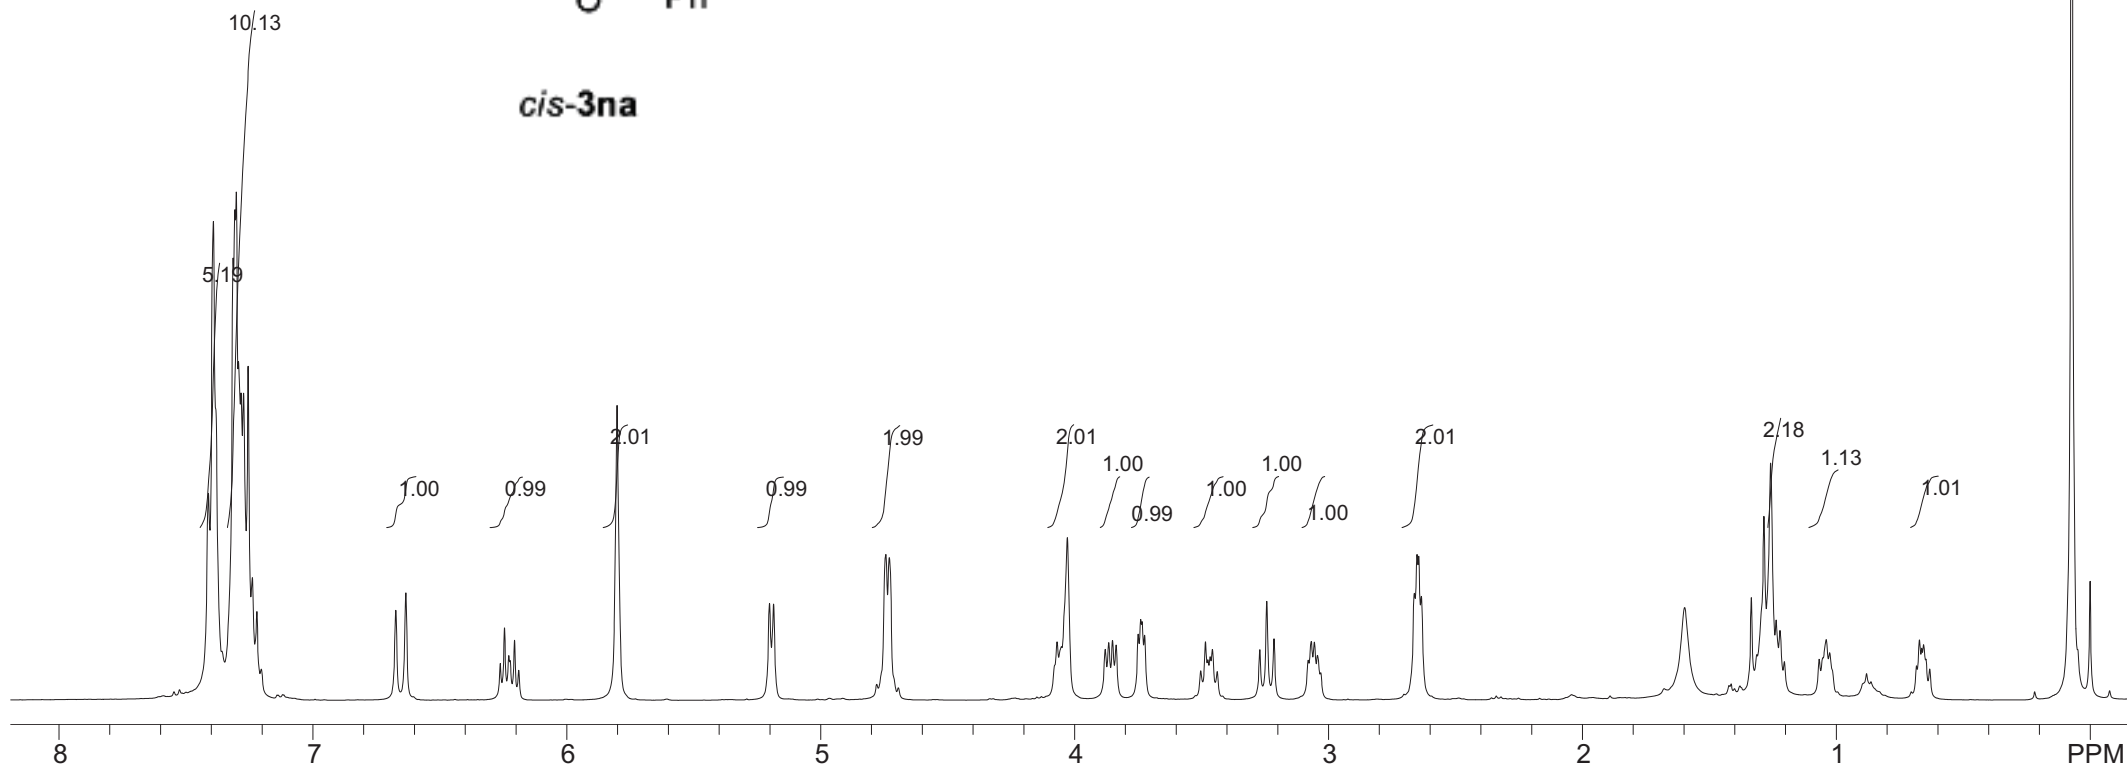

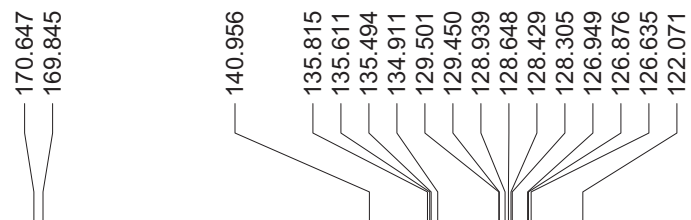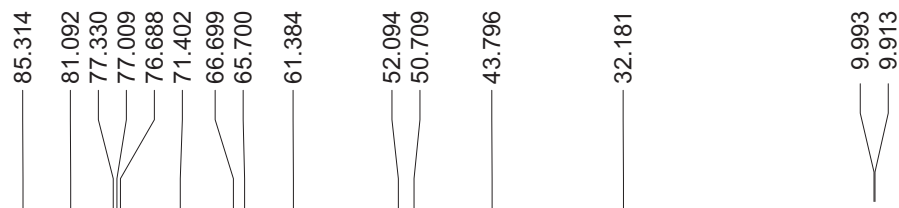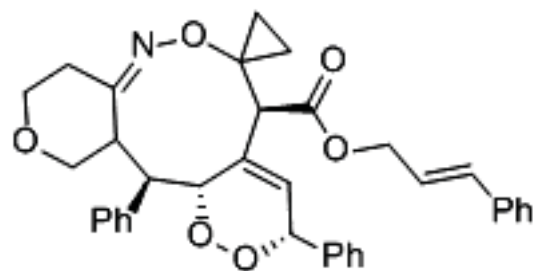

*cis-3na*

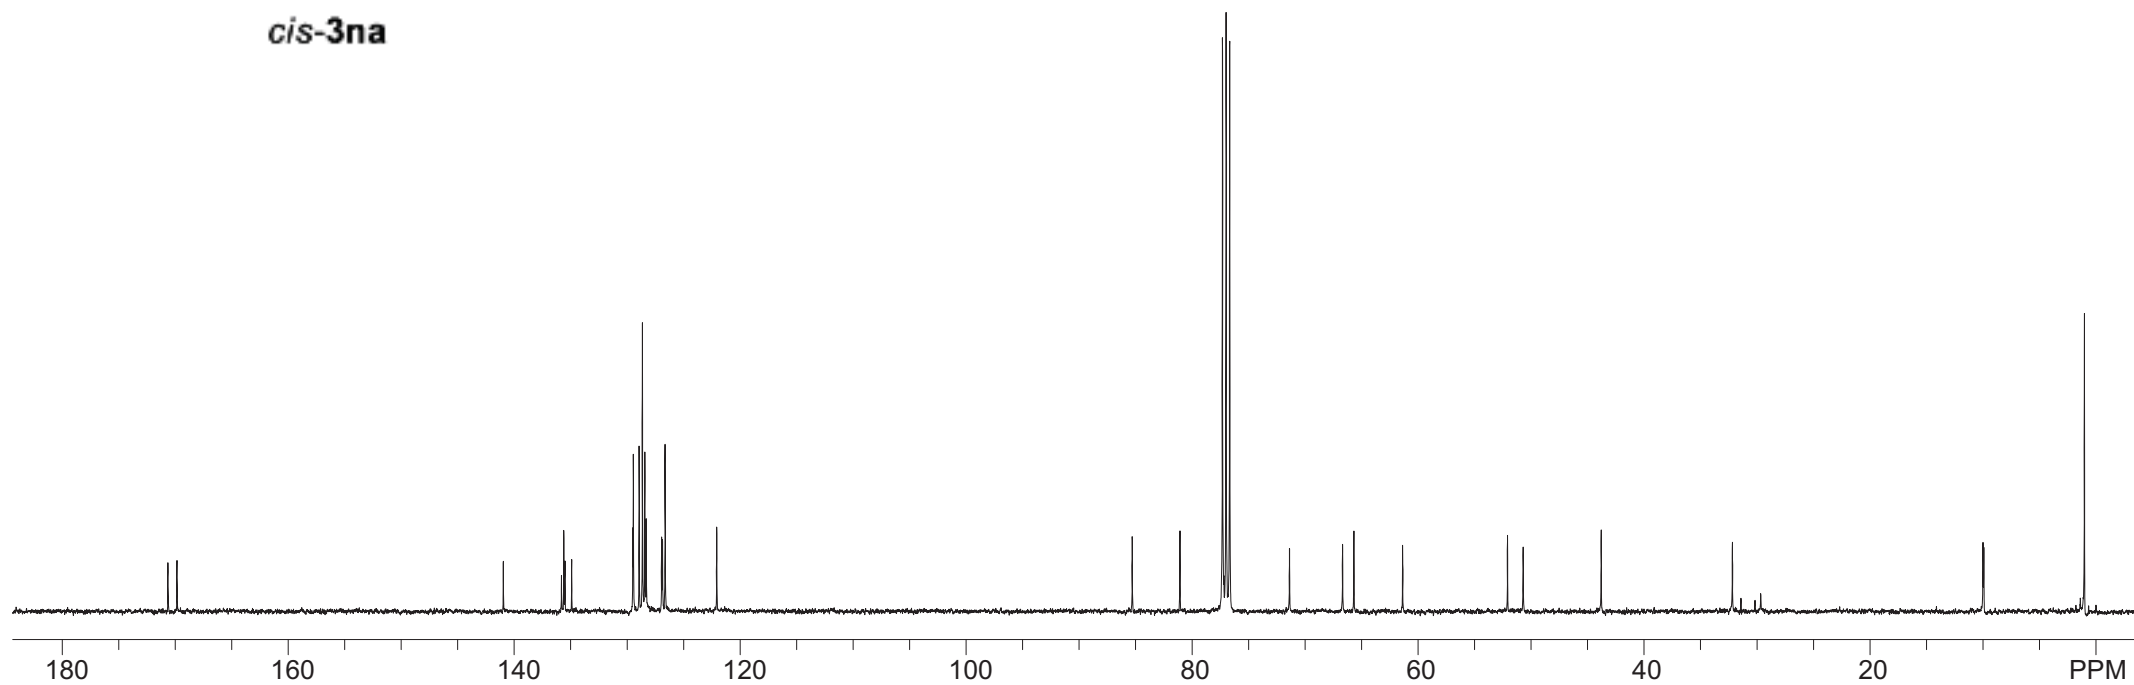

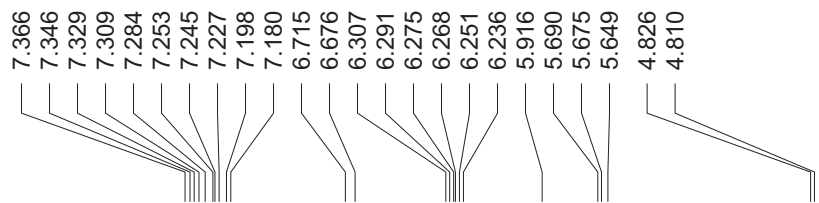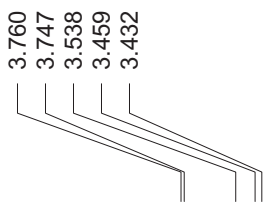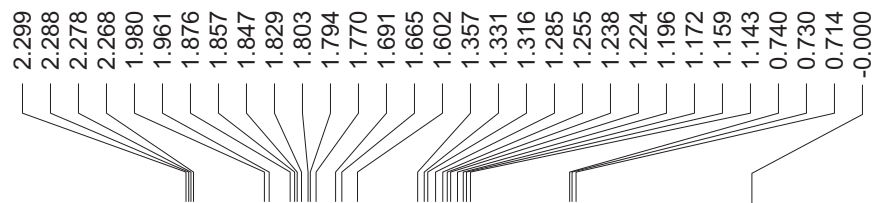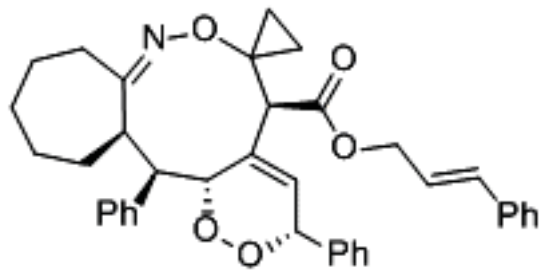

*cis-30a*

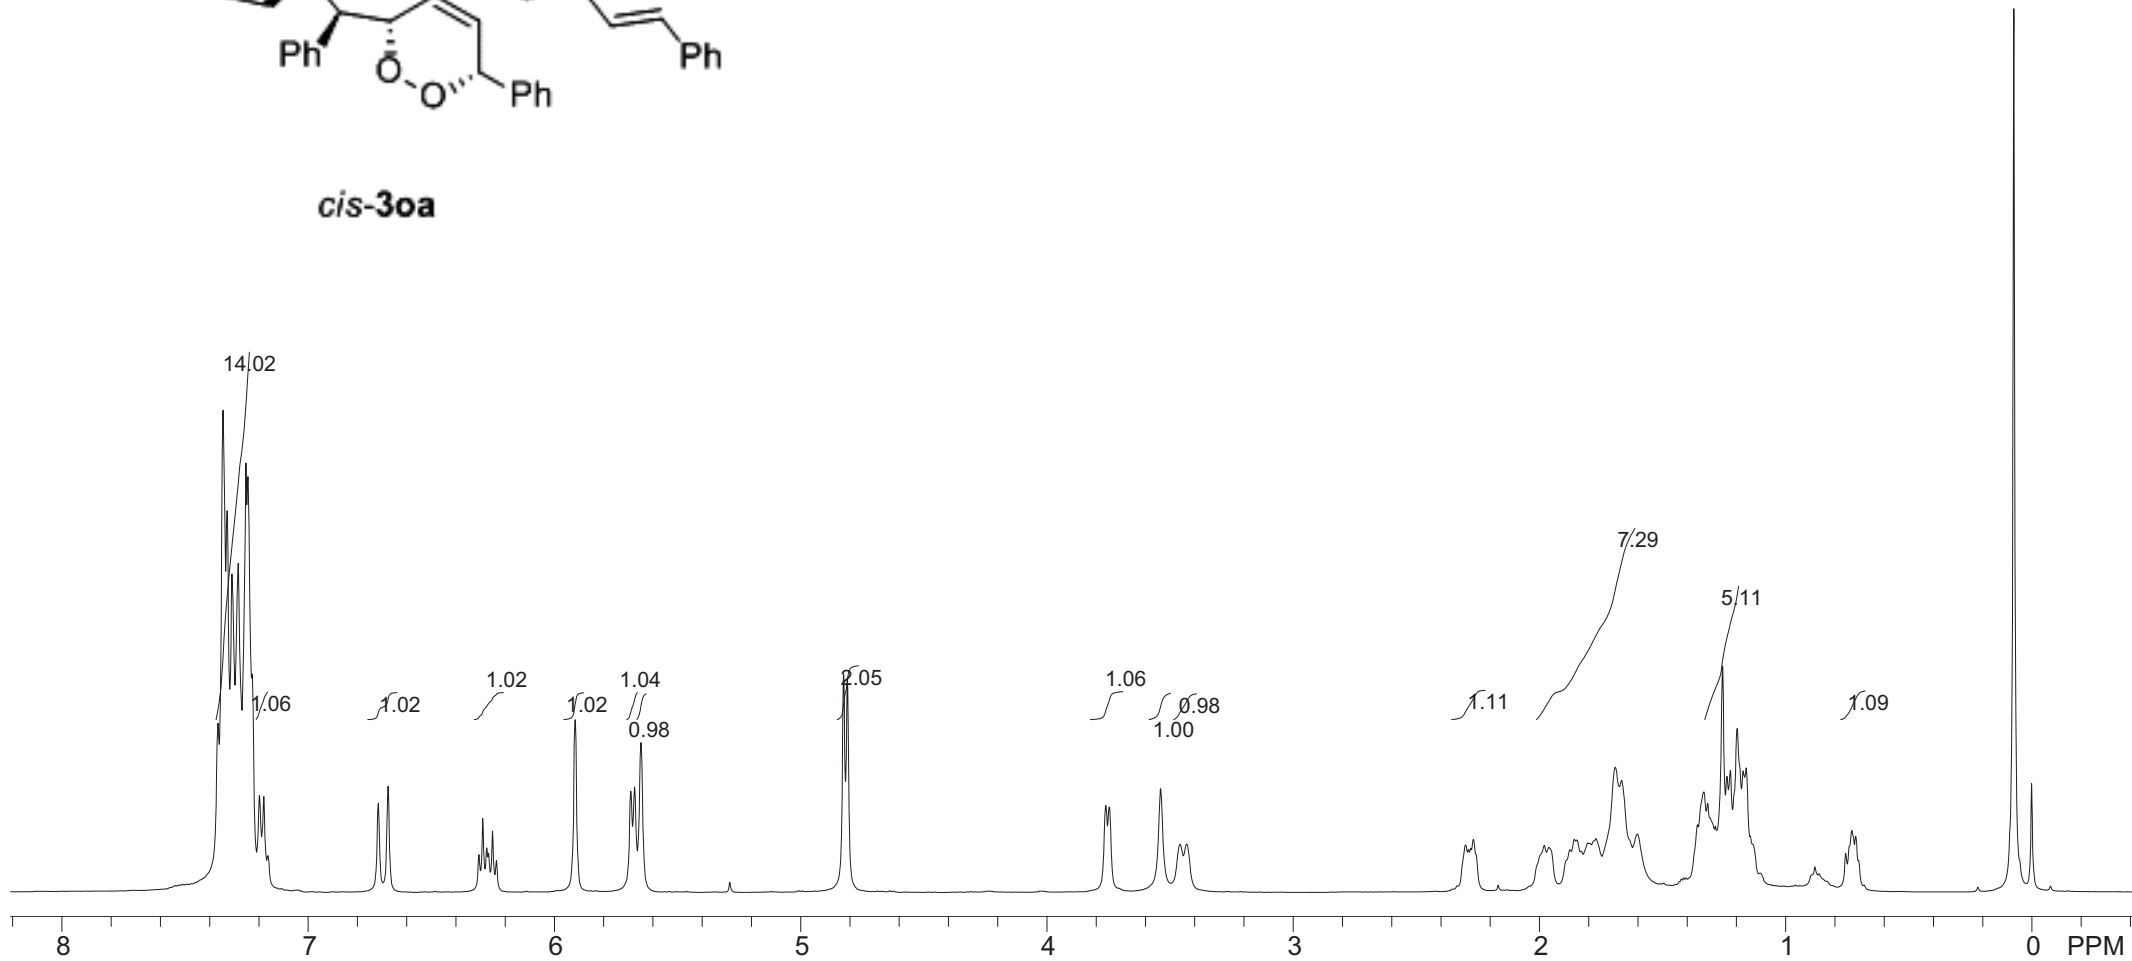

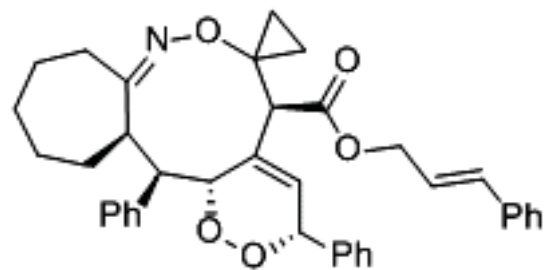

*cis-3oa*

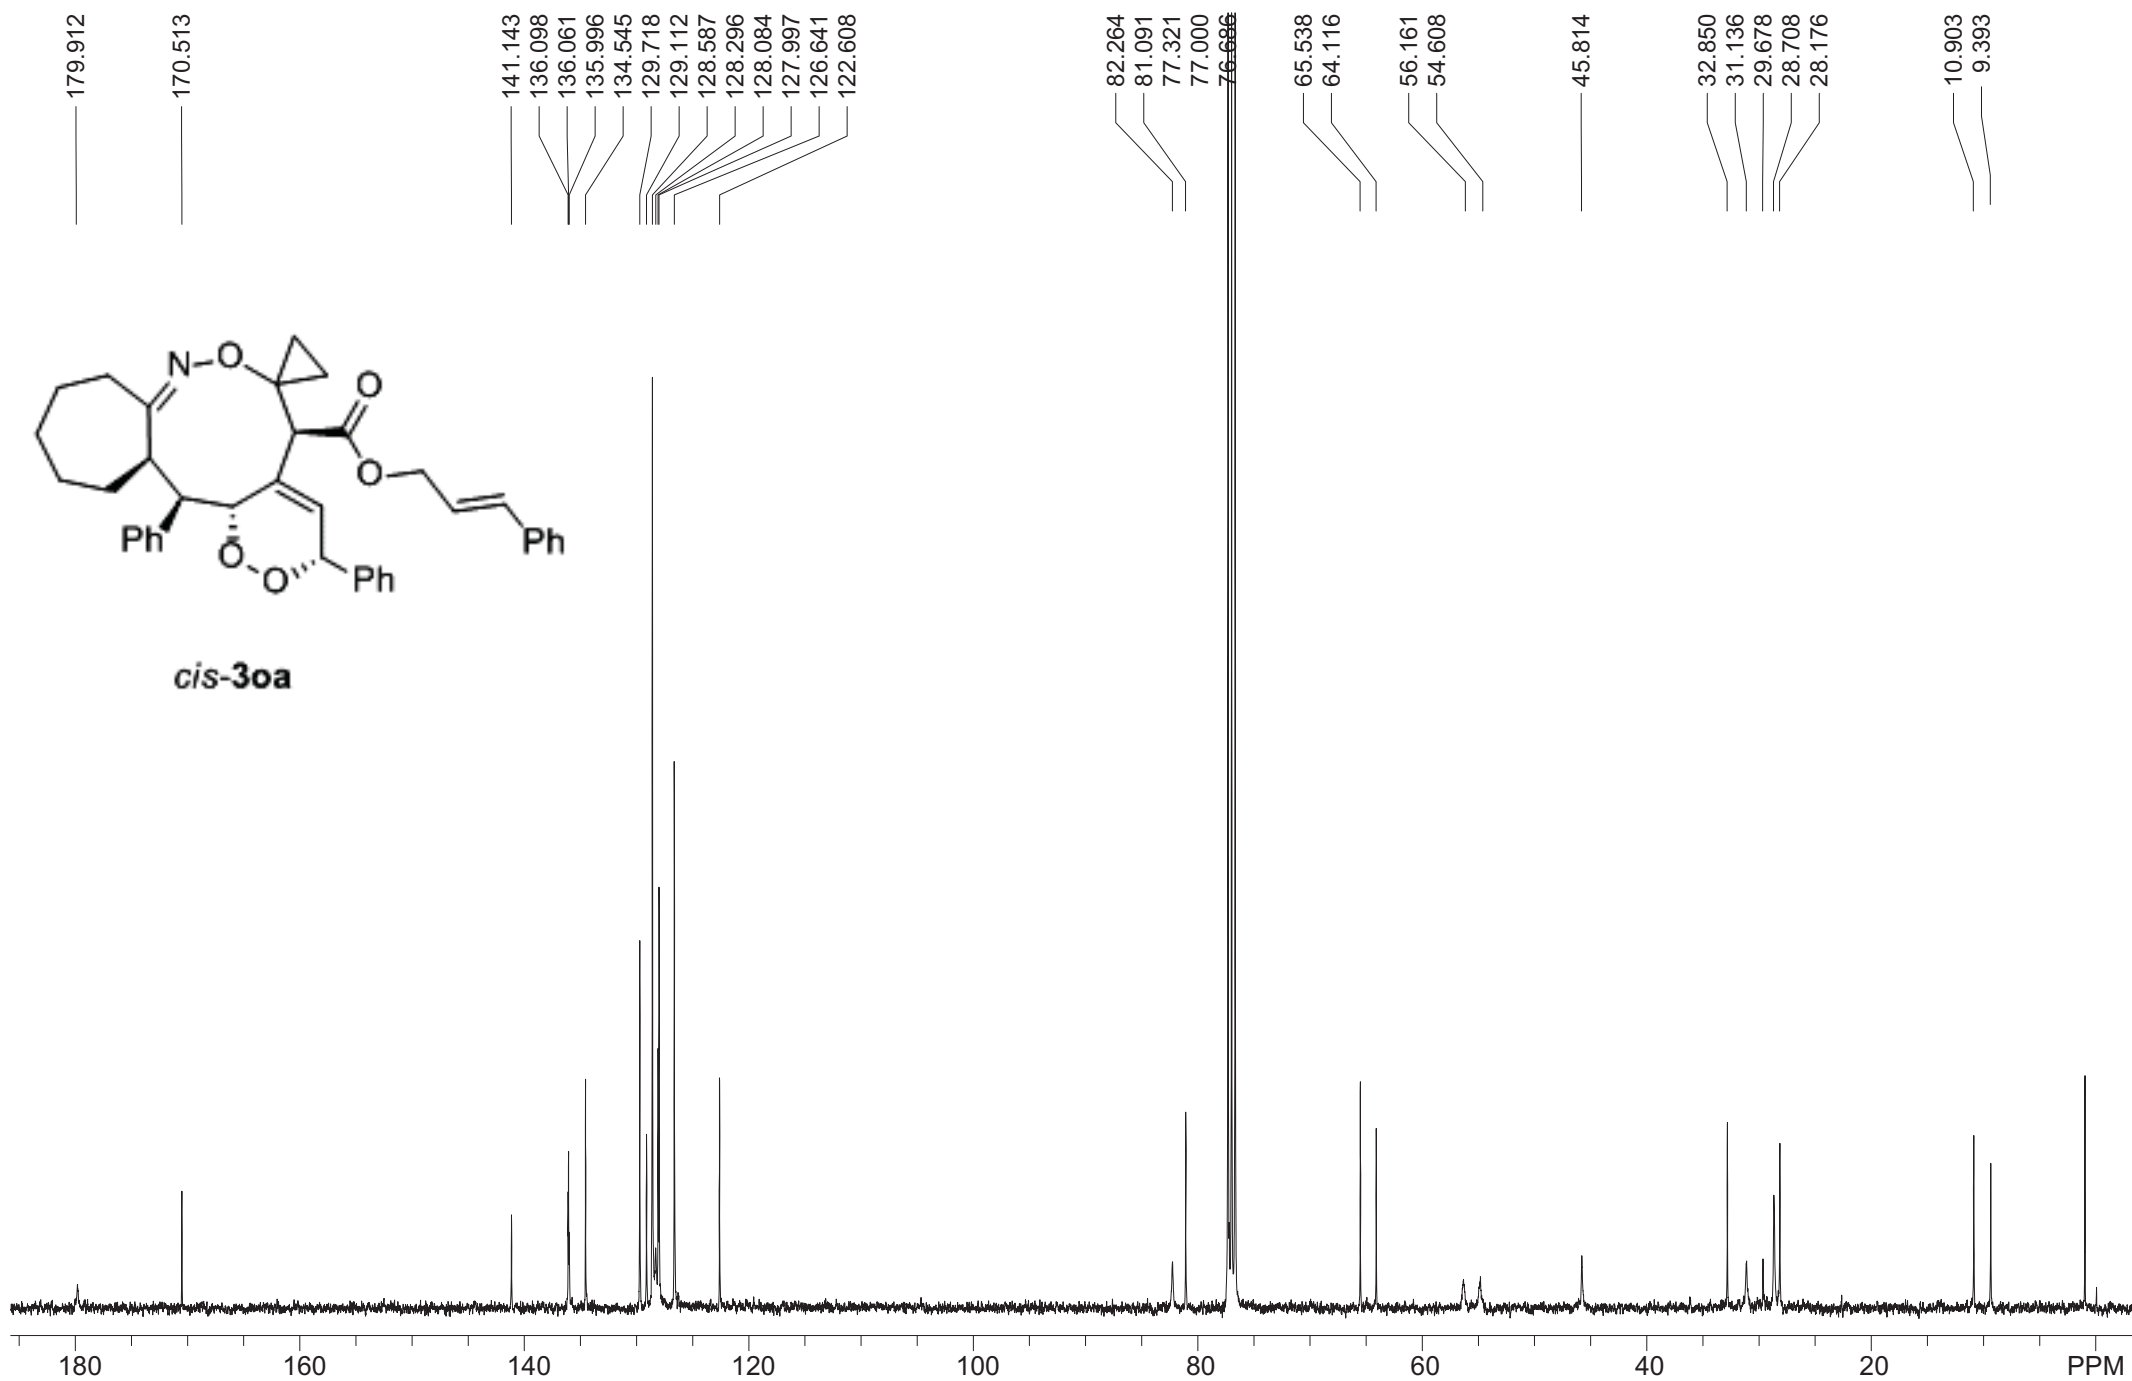

7.378  
7.359  
7.326  
7.308  
7.289  
7.268  
7.249  
7.226  
7.204  
7.178  
7.164  
7.147  
7.003  
6.985  
6.516  
5.858  
5.659  
5.492  
4.707  
4.677  
4.570  
4.540  
4.024  
3.391  
3.382  
2.793  
2.776  
2.758  
2.741  
1.945  
1.768  
1.512  
1.494  
1.306  
1.294  
1.281  
1.267  
1.258  
1.198  
1.186  
1.172  
1.156  
1.107  
1.093  
1.079  
1.066  
0.854  
0.842  
0.829  
0.815  
0.000

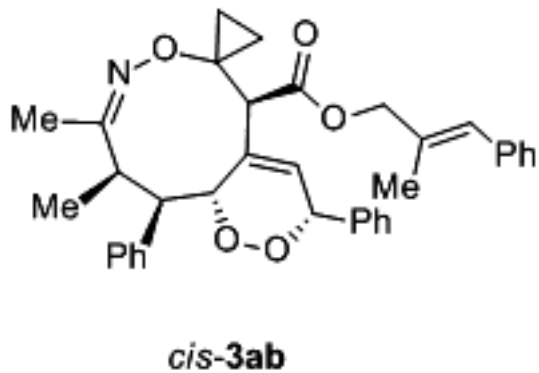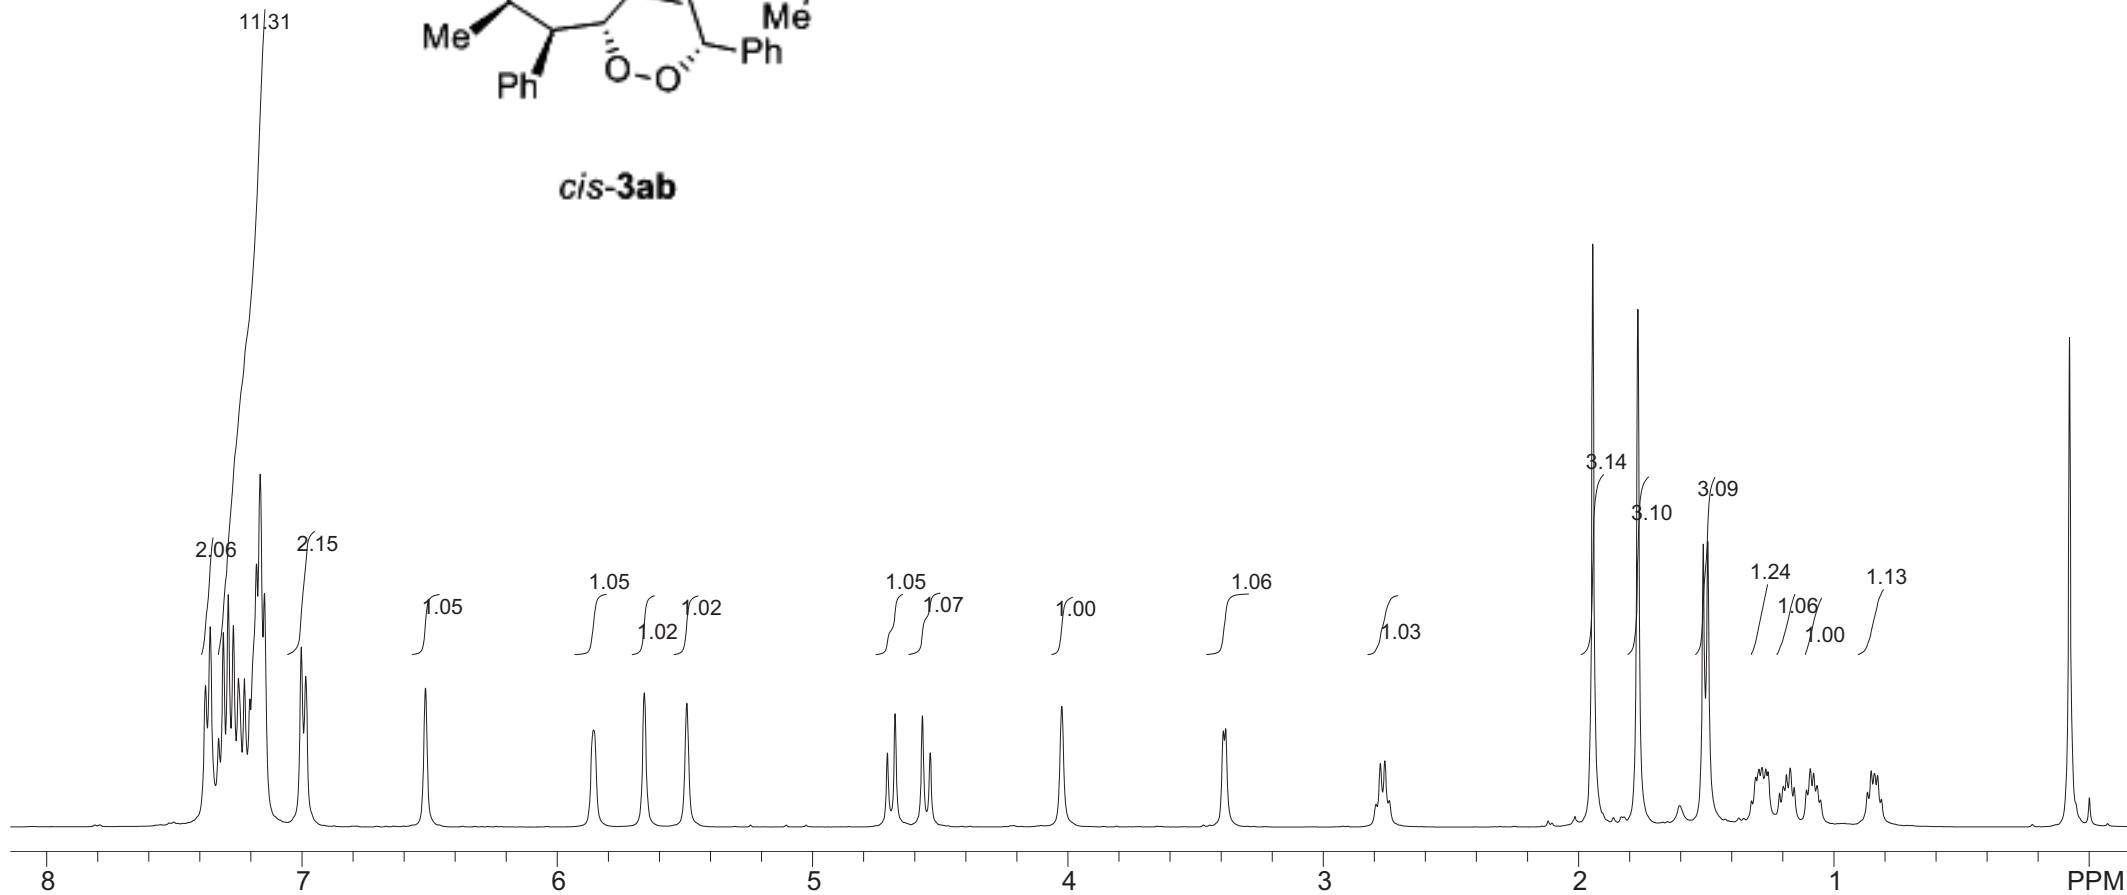



172.489  
169.558  
142.879  
136.652  
136.426  
135.522  
131.963  
129.659  
129.324  
128.806  
128.544  
128.259  
128.113  
127.873  
127.836  
126.845  
126.444  
125.051

79.858  
77.627  
77.321  
77.000  
76.679  
70.824

62.876

50.918  
49.832  
45.902

21.643  
15.649  
12.514  
11.180  
9.371

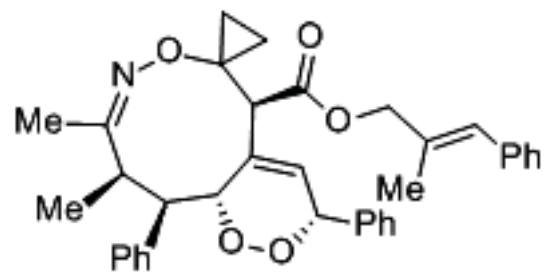

*cis-3ab*

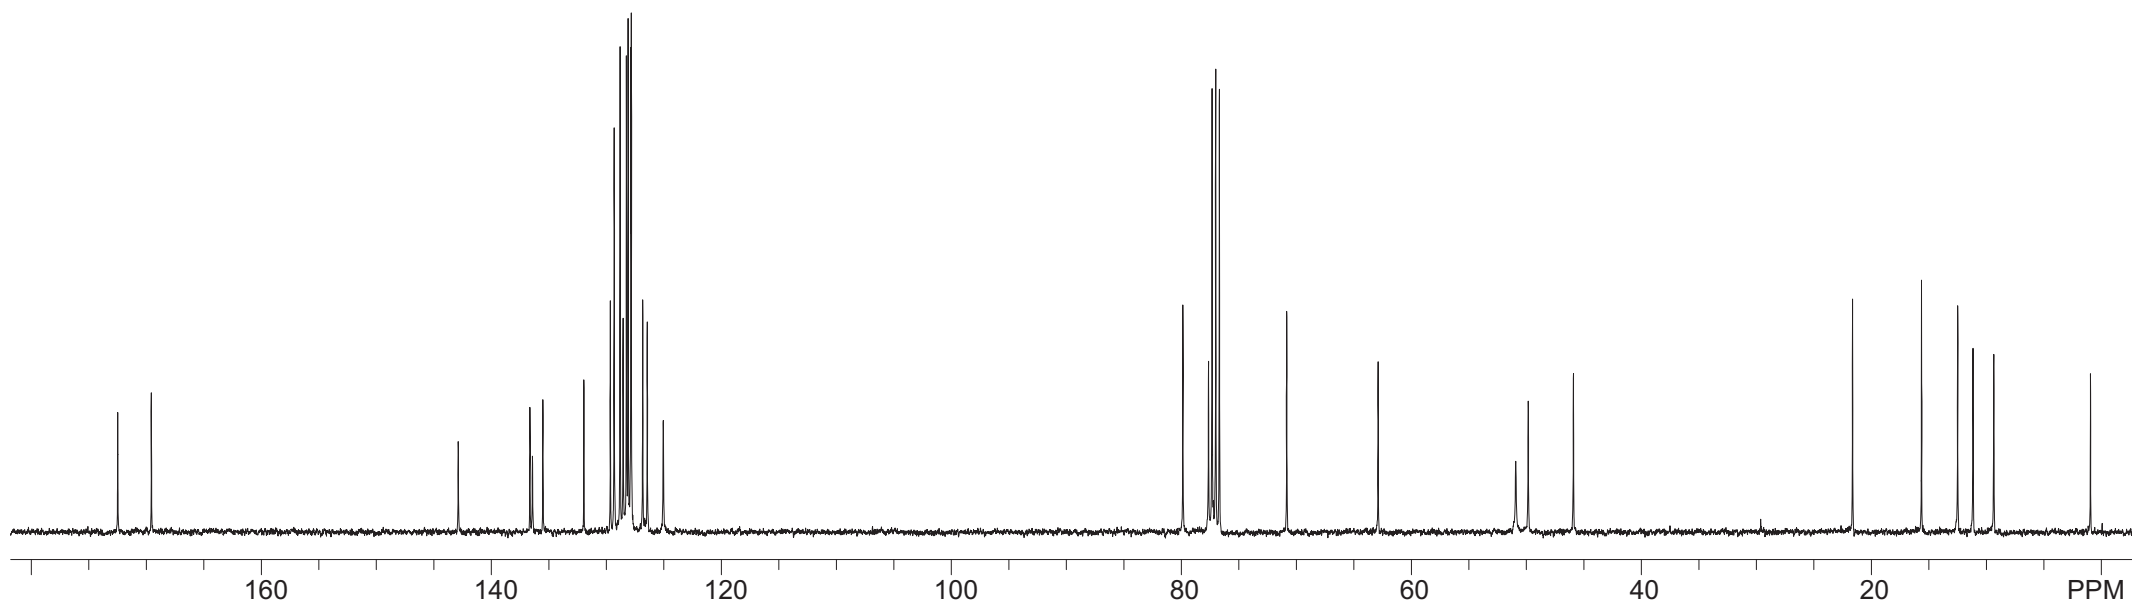

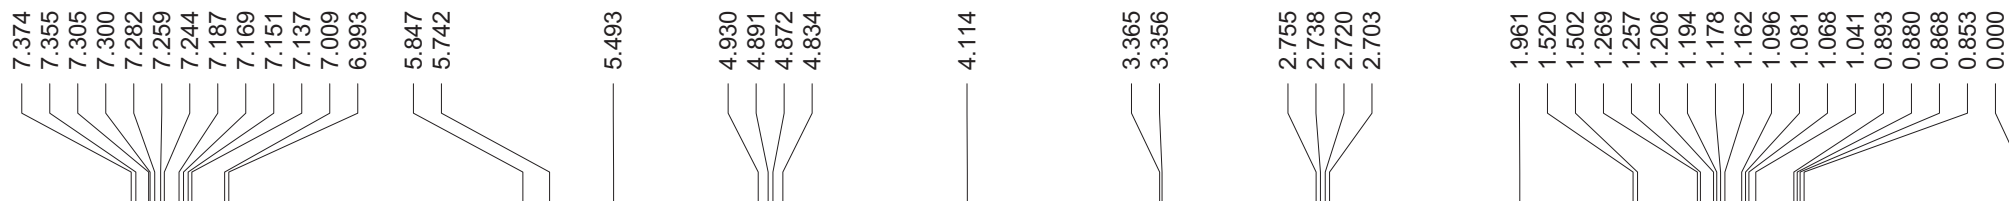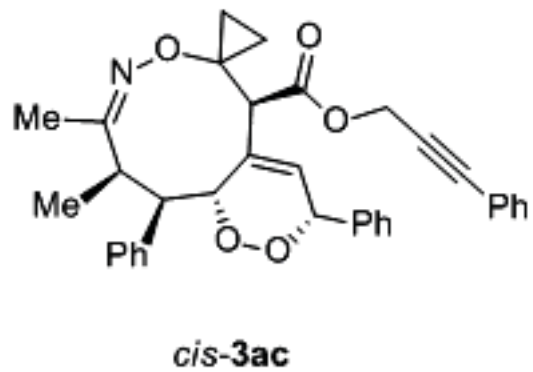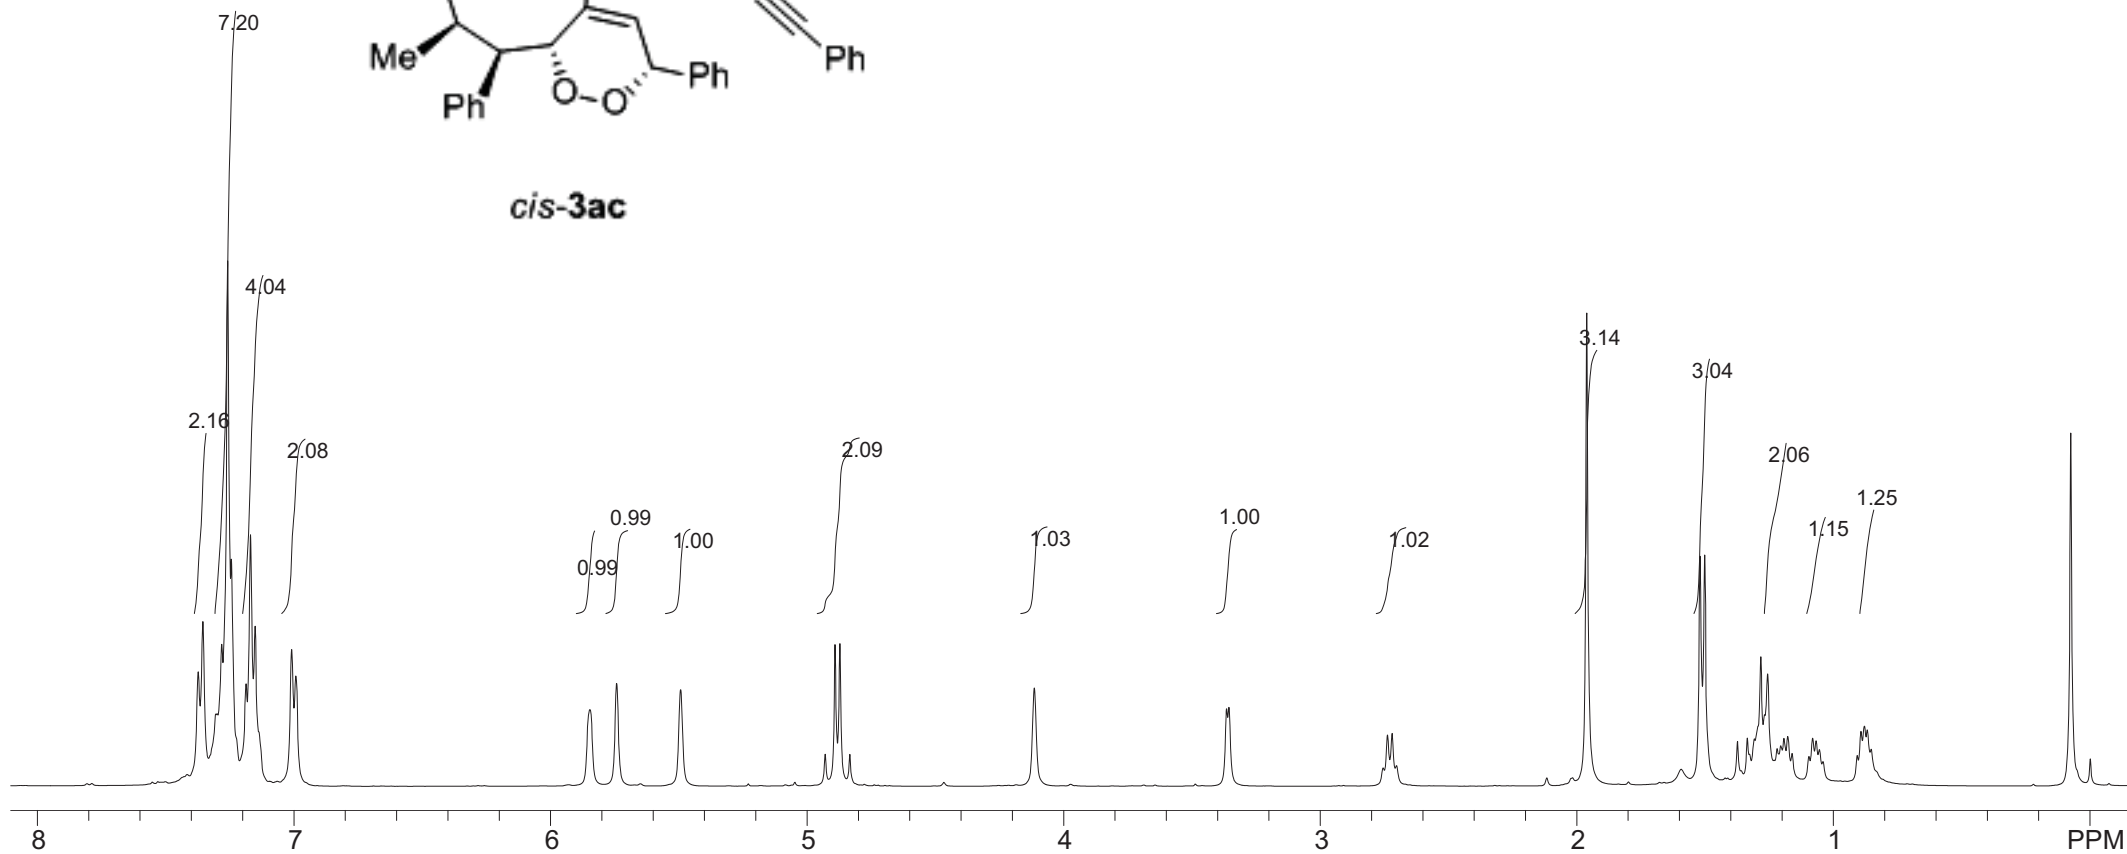

172.417  
168.924

142.820  
136.324  
135.215  
131.715  
129.316  
128.733  
128.558  
128.223  
127.975  
127.873  
126.436  
124.898  
121.719

86.844  
82.199  
79.800  
77.321  
77.000  
76.679

62.745

53.018  
50.802  
48.964  
46.120

21.774

12.288  
11.223  
9.328

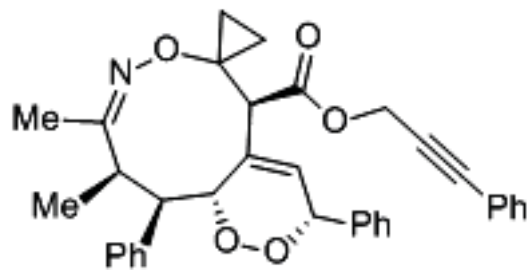

*cis-3ac*

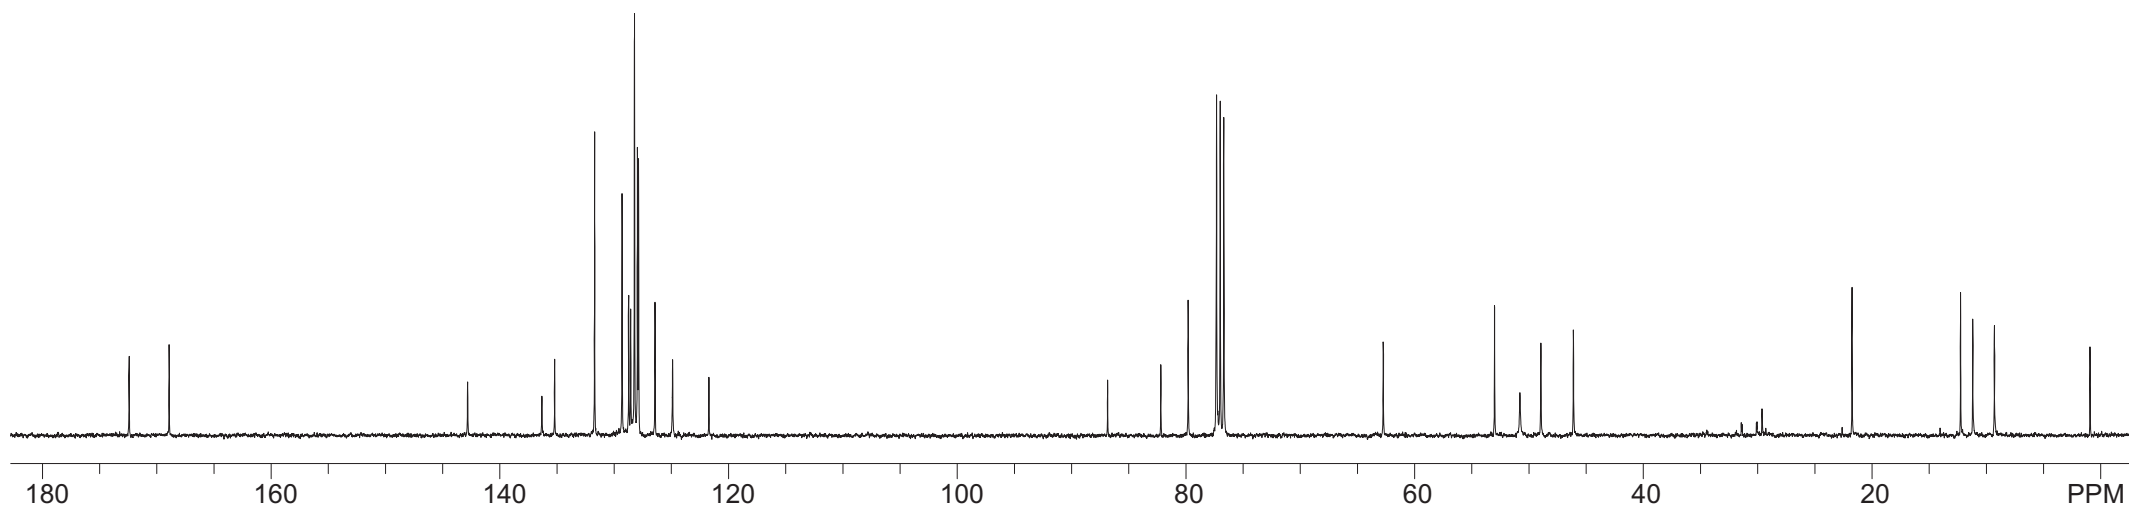

7.376  
7.358  
7.290  
7.271  
7.252  
7.229  
7.217  
7.201  
7.181  
7.163  
7.032  
7.020

5.837  
5.649  
5.503

4.144  
4.127  
4.111  
4.094  
3.971

3.366  
3.357

2.781  
2.764  
2.746  
2.729

1.958  
1.516  
1.499  
1.283  
1.256  
1.238  
1.220  
1.202  
1.182  
1.169  
1.154  
1.137  
1.079  
1.065  
1.051  
1.038  
1.025  
0.820  
0.805  
0.780  
0.765  
0.000

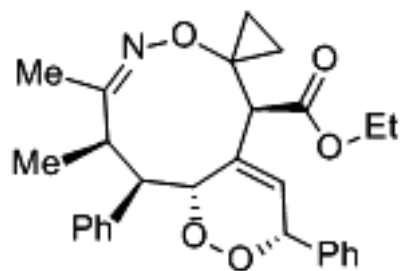

*cis-3ad*

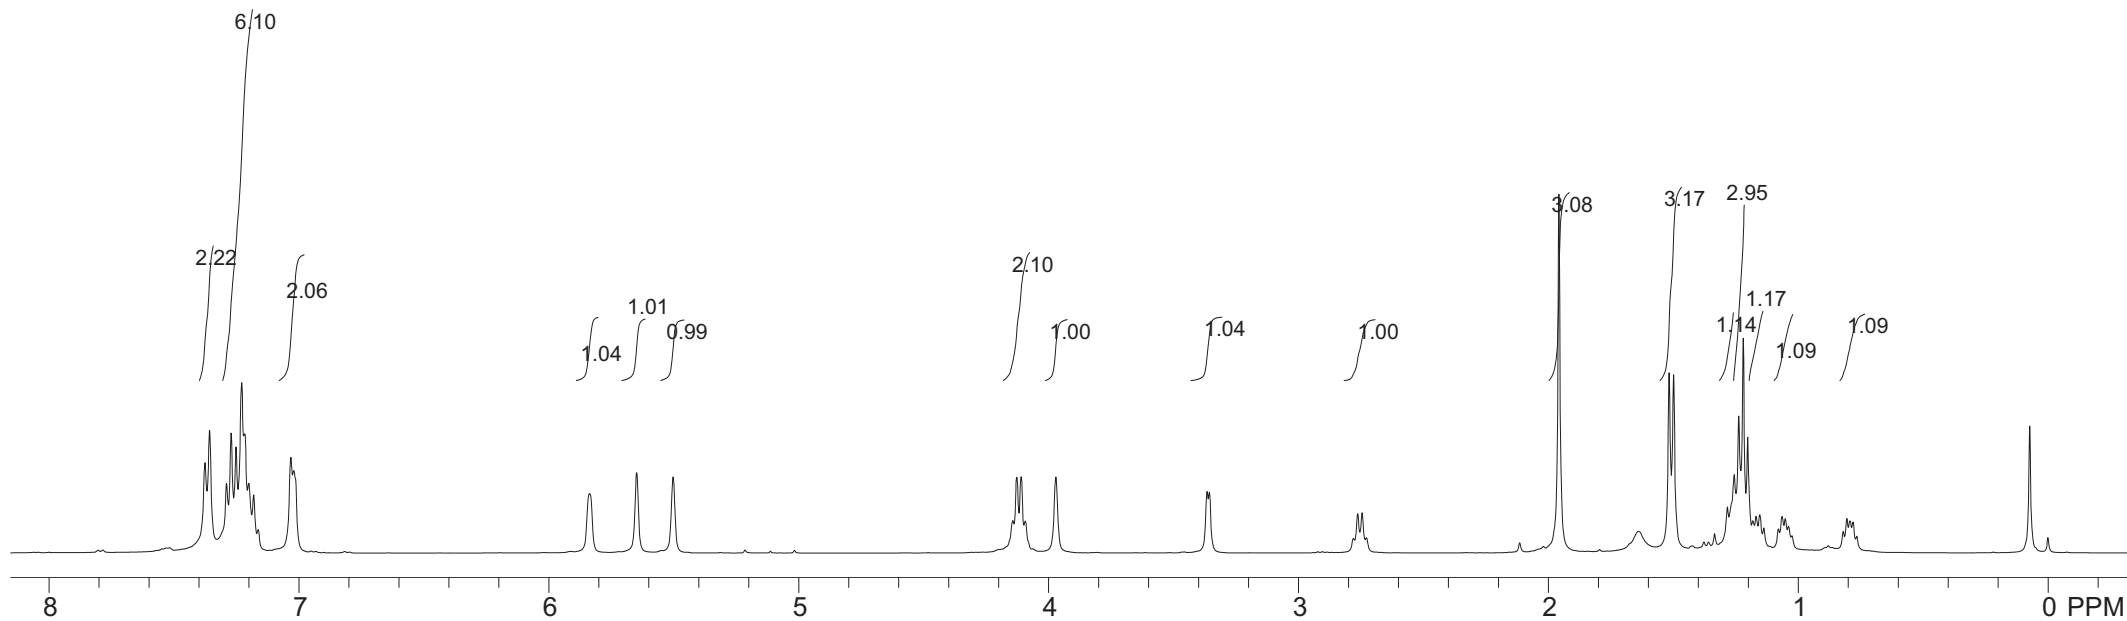

172.484  
169.633

142.910  
136.544  
135.494

129.362  
128.597  
128.283  
127.962  
127.889  
126.453  
124.856

79.838  
77.607  
77.330  
77.009  
76.696

62.849  
60.859

50.913  
49.542

45.991

21.703

14.091  
12.479  
11.211  
9.351

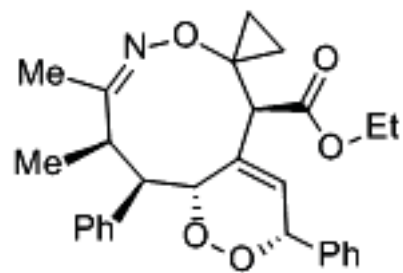

*cis-3ad*

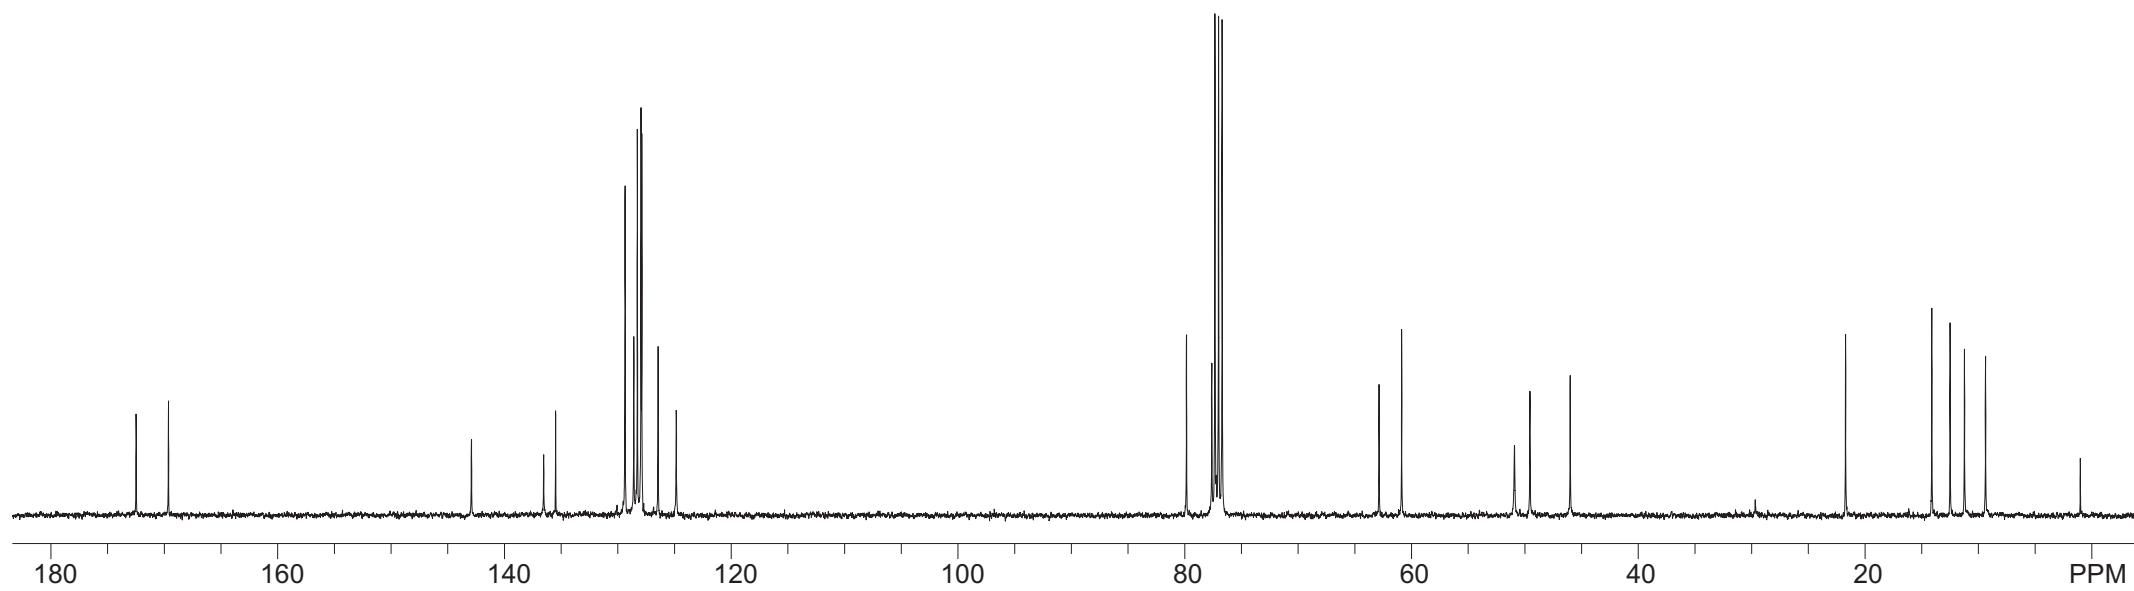

7.375  
7.356  
7.292  
7.274  
7.255  
7.227  
7.213  
7.202  
7.183  
7.165  
7.028  
7.015

5.838  
5.626  
5.499

4.120  
4.103  
4.093  
4.076  
4.058  
4.040  
4.024  
4.013  
3.997  
3.960  
3.371  
3.362  
2.791  
2.773  
2.755  
2.738  
1.955

1.602  
1.580  
1.563  
1.545  
1.515  
1.497  
1.329  
1.321  
1.310  
1.302  
1.291  
1.283  
1.273  
1.263  
1.260  
1.233  
1.192  
1.178  
1.165  
1.151  
1.134  
1.081  
1.066  
1.053  
1.040  
0.868  
0.849  
0.831  
0.805  
0.793  
0.780  
0.765  
-0.000

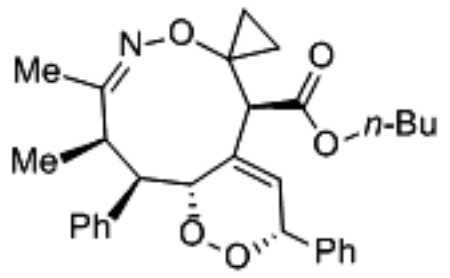

*cis-3ae*

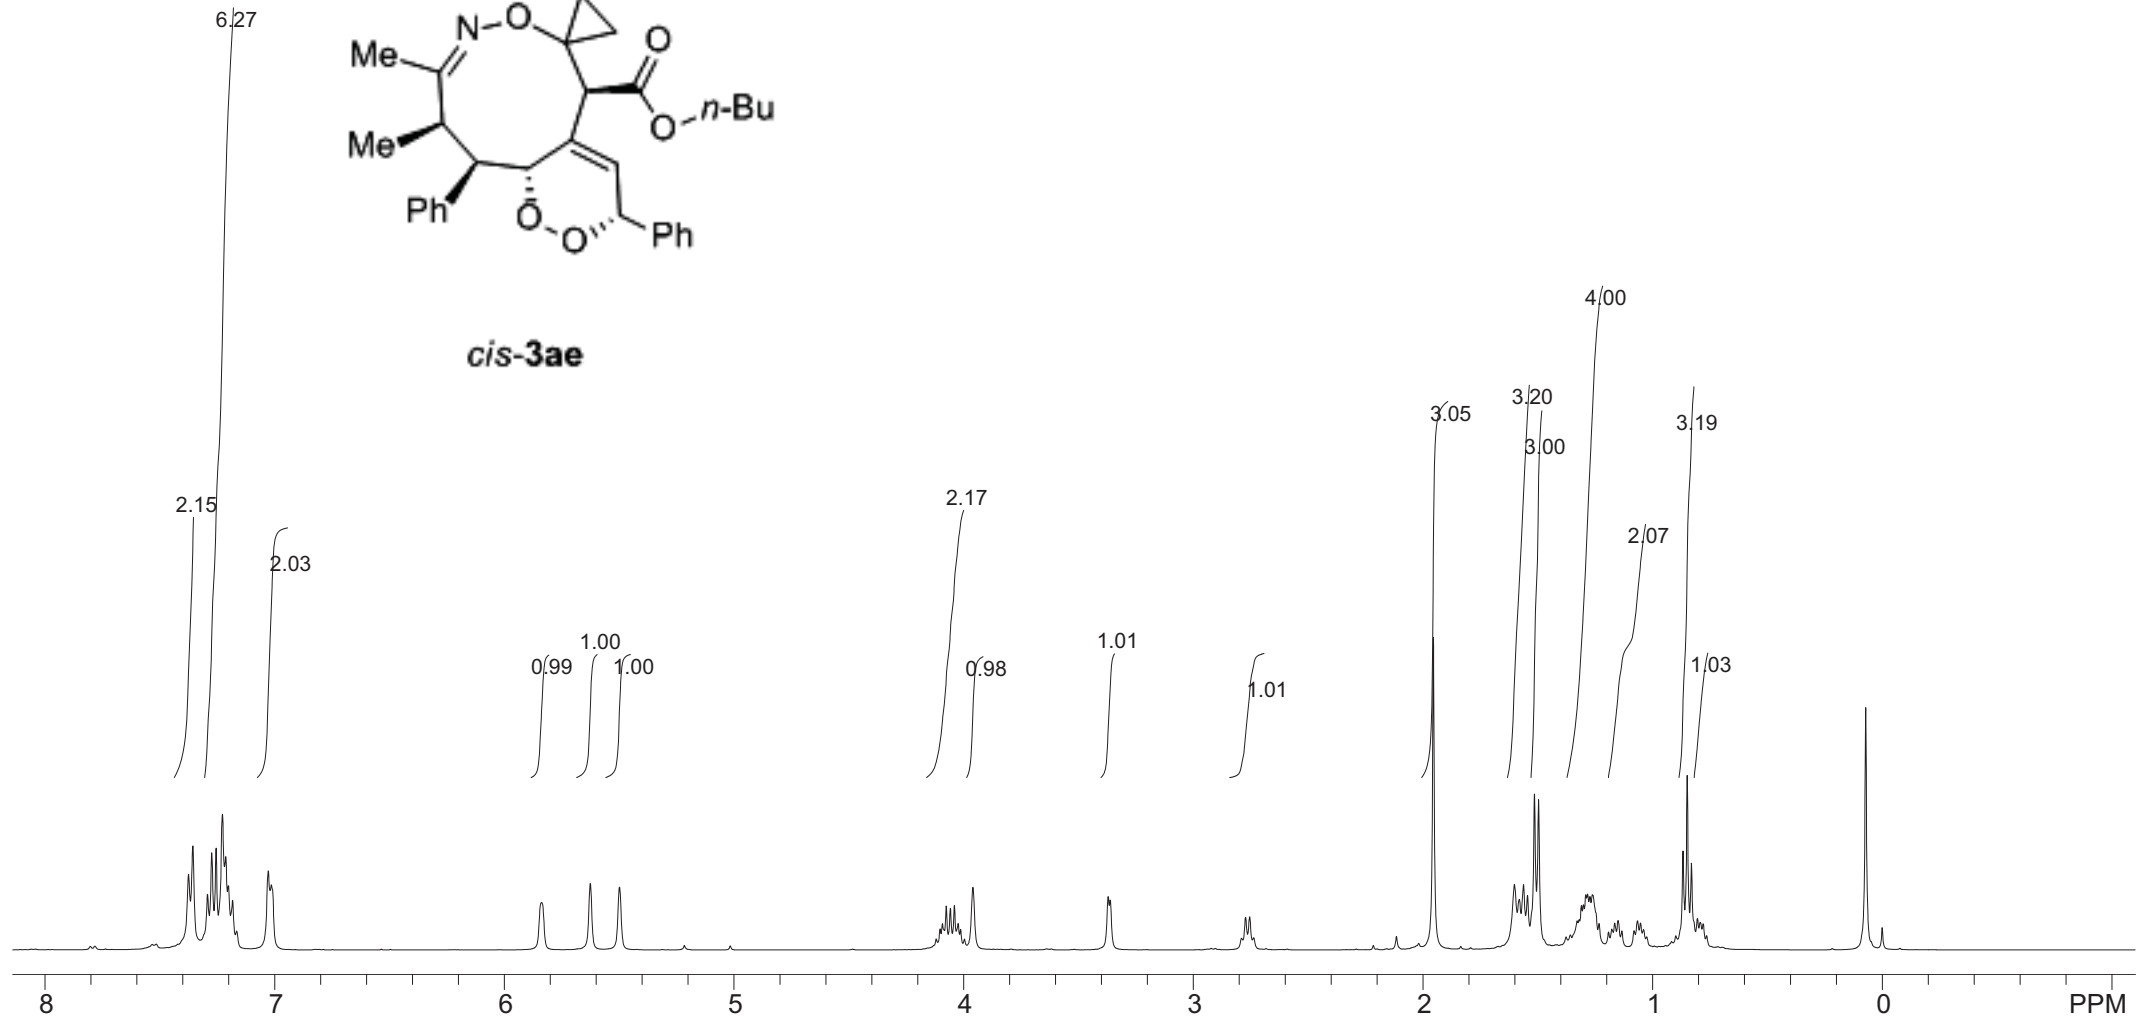

172.491  
169.786

142.932  
136.530  
135.582  
129.369  
128.597  
128.290  
127.933  
127.904  
126.467  
124.922

79.882  
77.680  
77.323  
77.009  
76.688

64.781  
62.871

50.964  
49.812  
45.955

30.453

21.689  
19.049  
13.573  
12.538  
11.196  
9.395

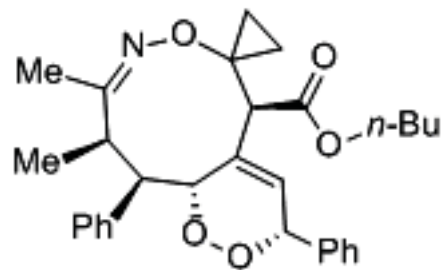

*cis-3ae*

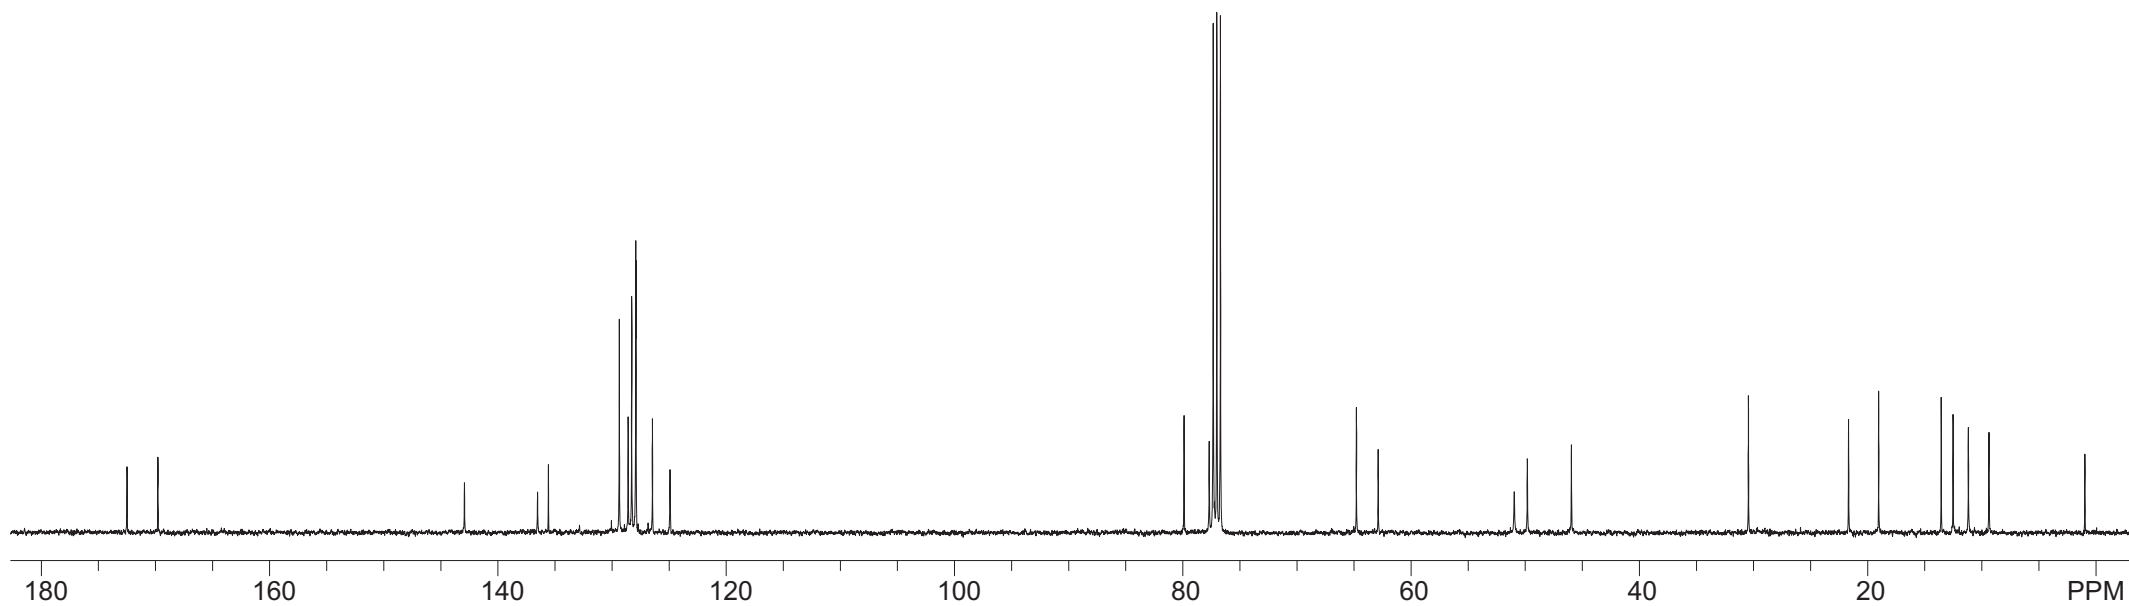

7.358  
7.339  
7.276  
7.256  
7.253  
7.234  
7.226  
7.210  
7.187  
7.167  
6.981  
6.964

5.824  
5.542  
5.448

5.138  
5.108  
5.034  
5.004

4.029

3.347  
3.339

2.747  
2.730  
2.712  
2.695

1.495  
1.927  
1.477  
1.271  
1.257  
1.241  
1.151  
1.139  
1.124  
1.108  
1.065  
1.052  
1.038  
1.025  
1.011  
0.801  
0.785  
0.773  
0.761  
0.746  
-0.000

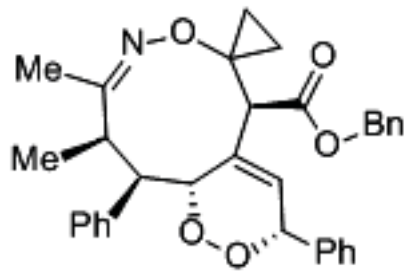

*cis-3af*

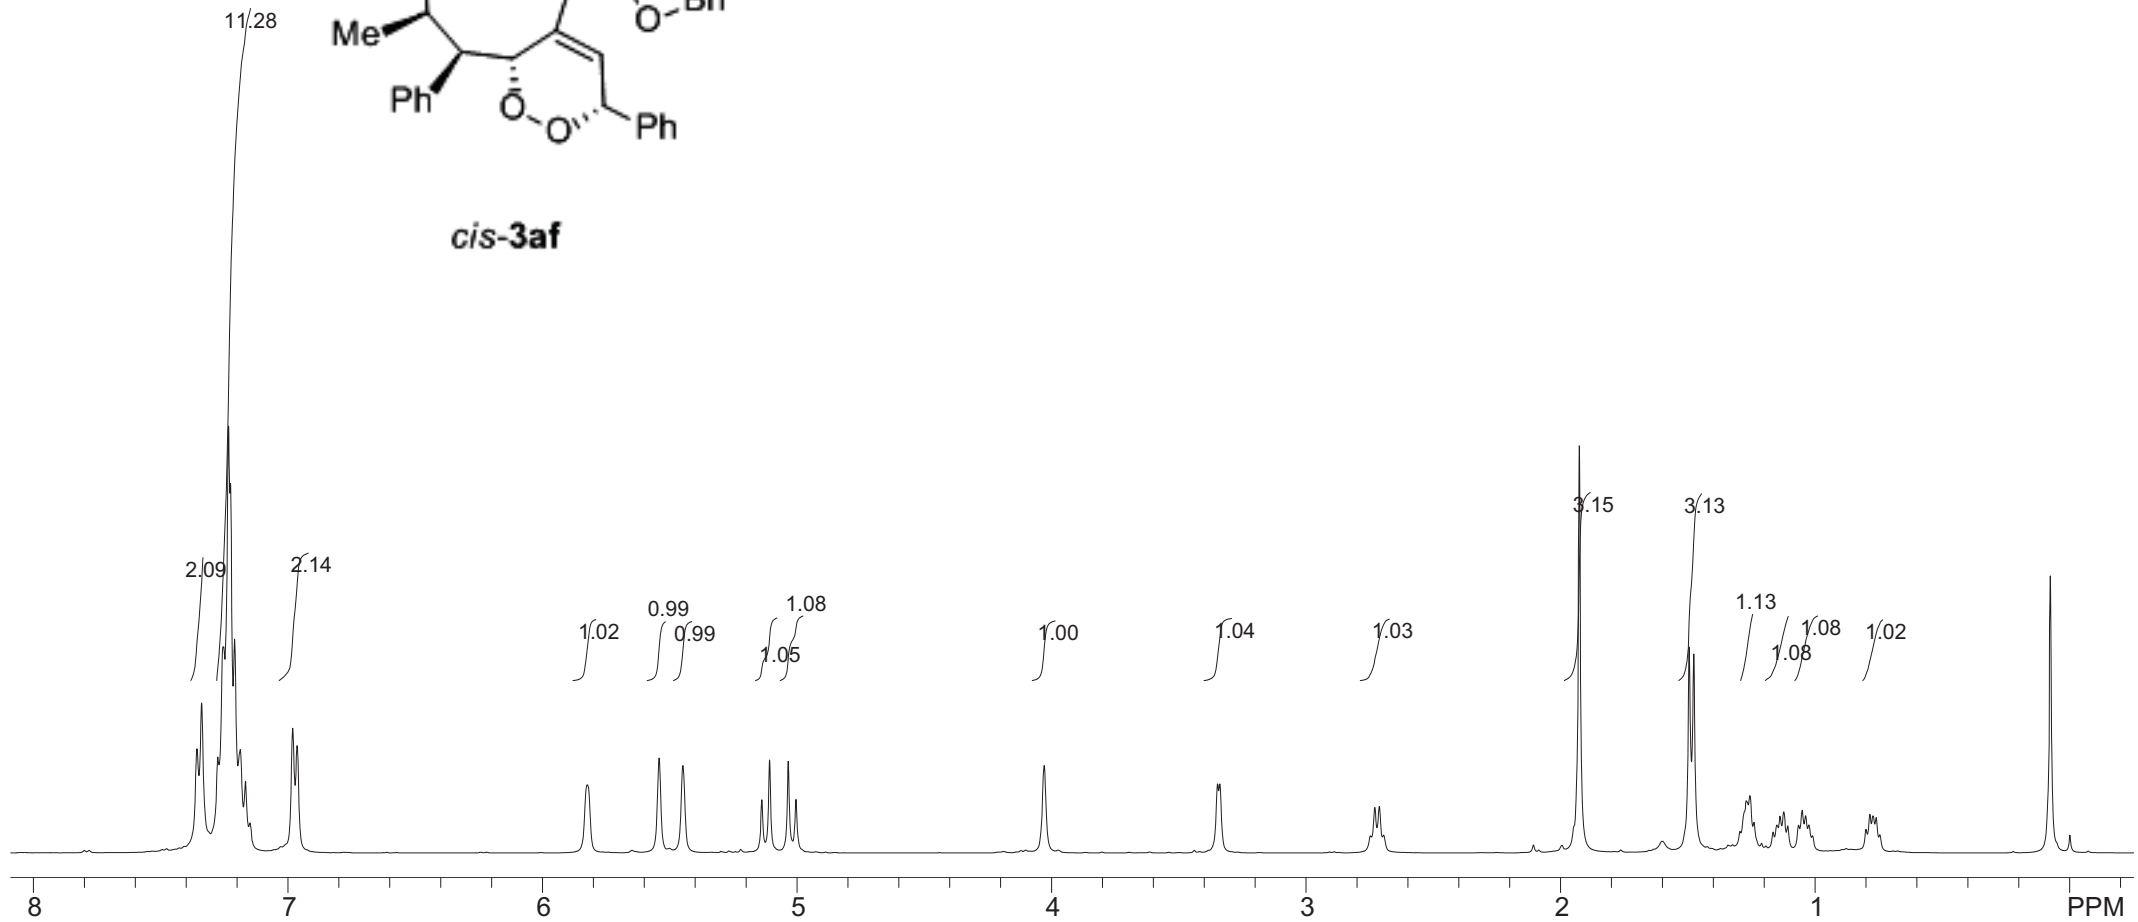



172.358  
169.507

142.864  
136.411  
135.441  
135.062  
129.309  
128.544  
128.493  
128.405  
128.259  
127.924  
127.844  
126.407  
124.876

79.785  
77.481  
77.321  
77.000  
76.686

66.763  
62.731

50.802  
49.351  
45.997

21.687

12.339  
11.136  
9.342

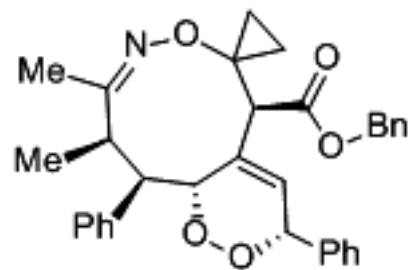

*cis-3af*

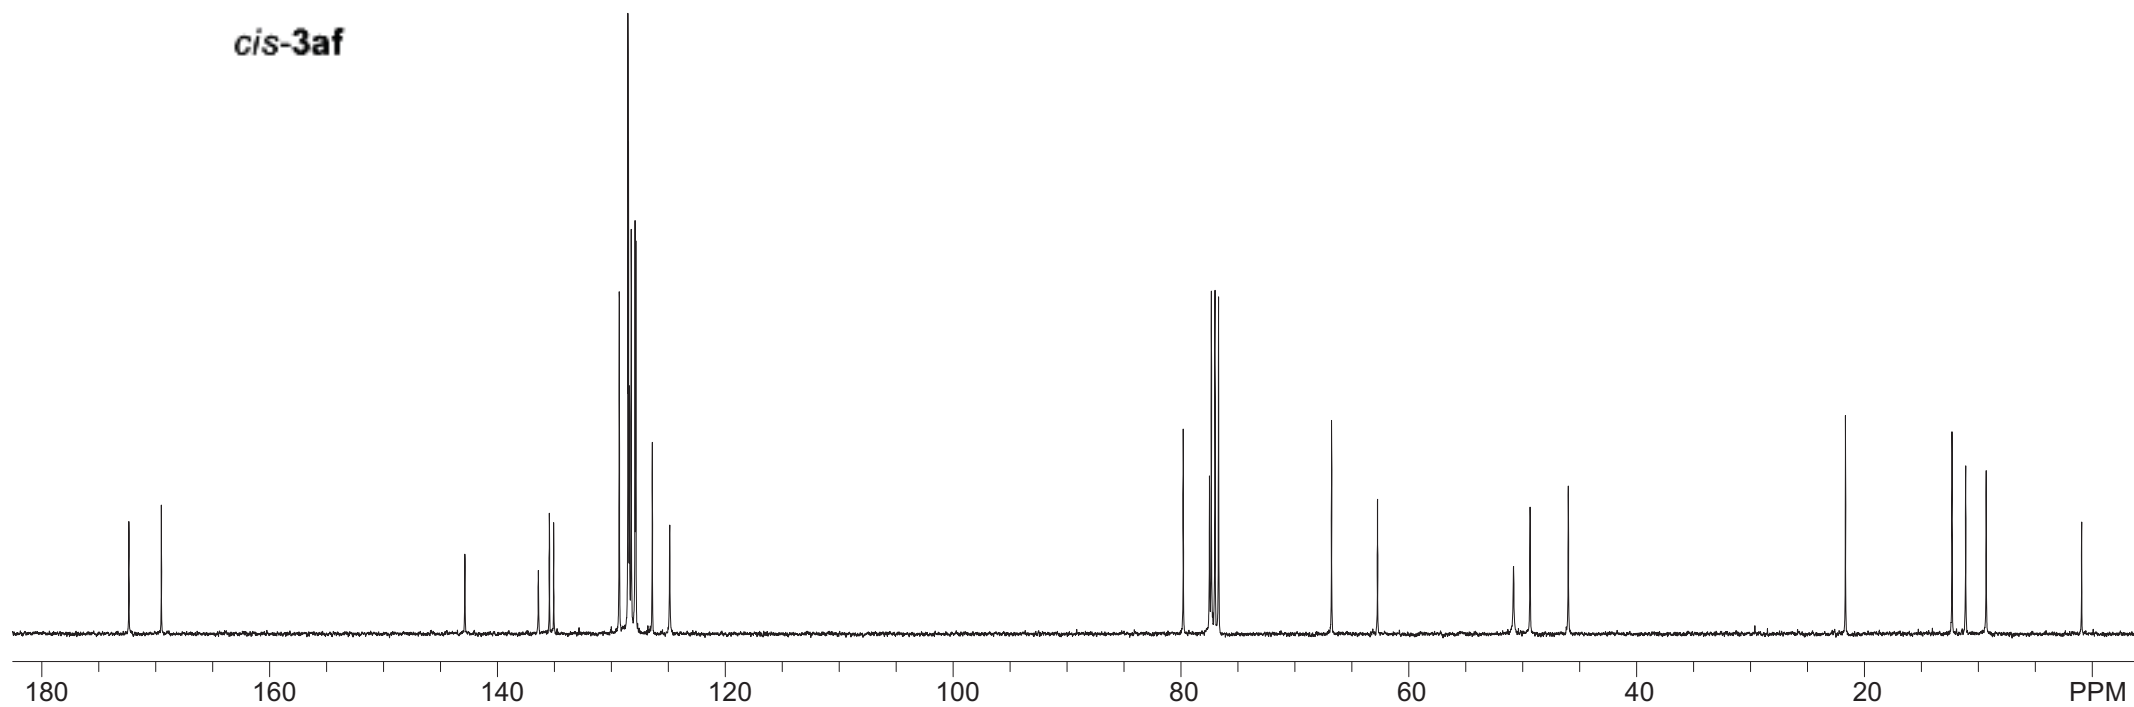

7.377  
7.359  
7.284  
7.266  
7.248  
7.223  
7.214  
7.194  
7.175  
7.157  
7.034  
7.024

5.832  
5.641  
5.501

5.013  
4.998  
4.982  
4.967  
4.951

3.920

3.371  
3.362

2.783  
2.766  
2.748  
2.731

1.955  
1.513  
1.495  
1.253  
1.237  
1.173  
1.160  
1.136  
1.120  
1.052  
1.040  
1.026  
1.011  
0.859  
0.845  
0.832  
0.820  
-0.000

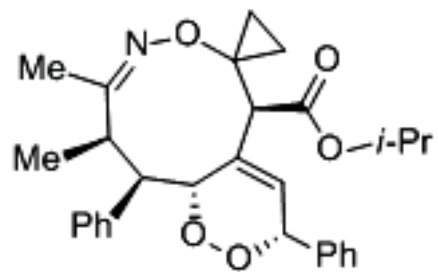

**cis-3ag**

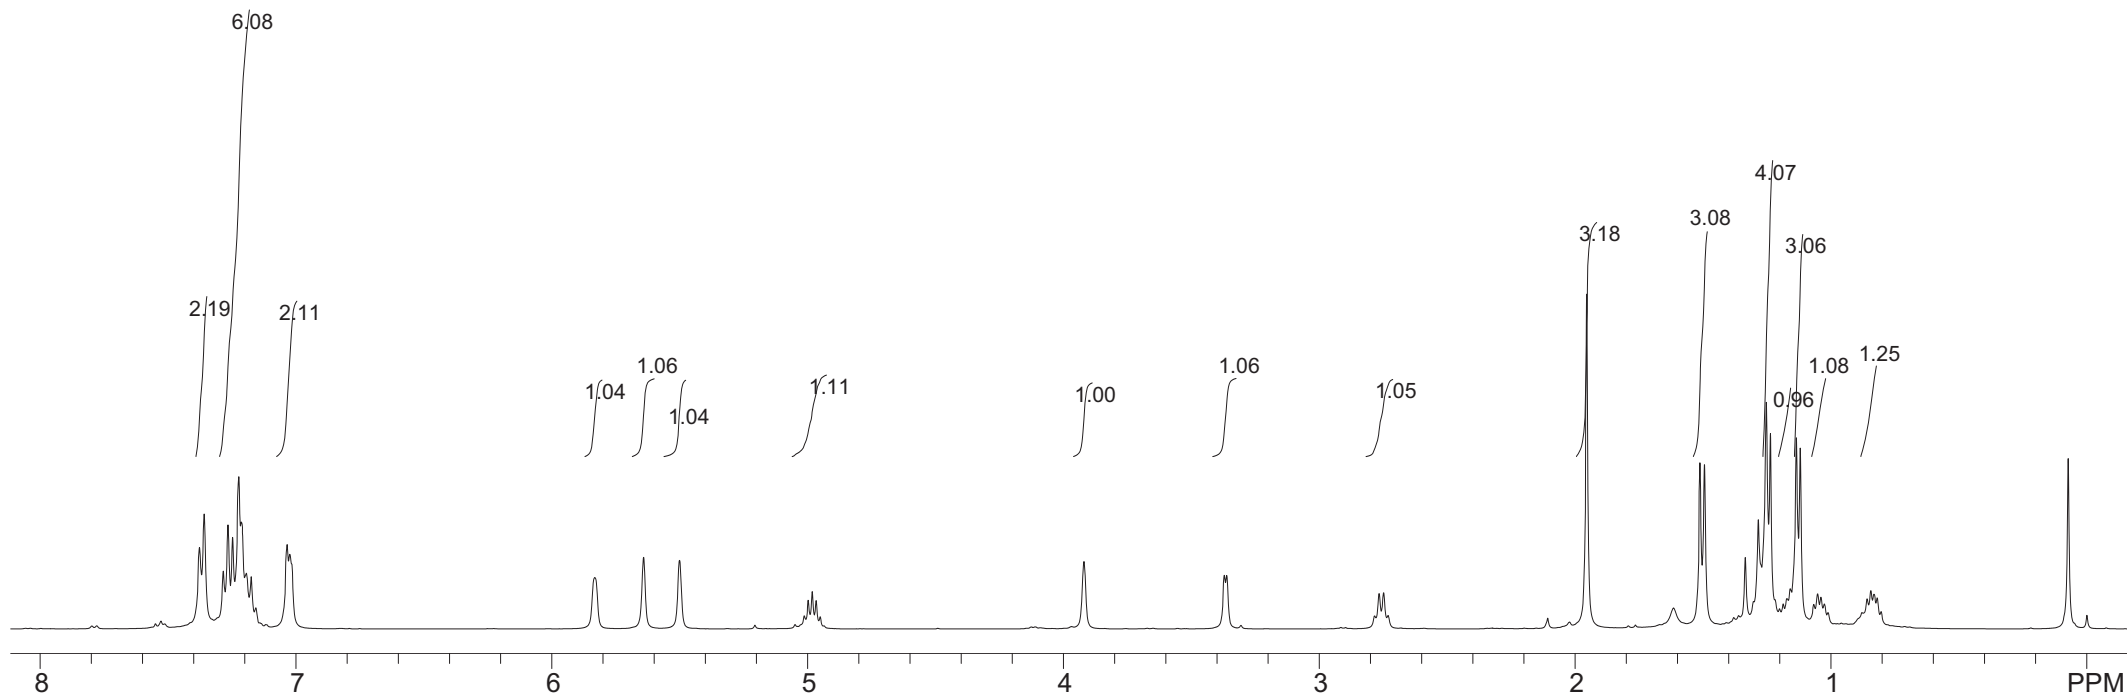

172.344  
169.150

142.944  
136.506  
135.711  
129.353  
128.580  
128.245  
127.946  
127.858  
126.415  
124.803

79.815  
77.693  
77.314  
77.000  
76.679  
68.484

62.782

50.875  
49.591  
45.931

21.767  
21.687  
21.607  
12.485  
11.099  
9.386

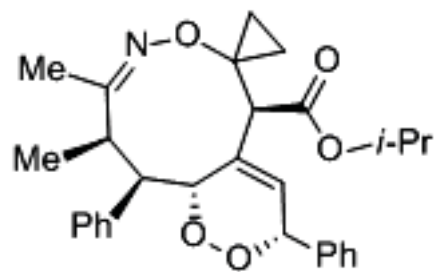

*cis-3ag*

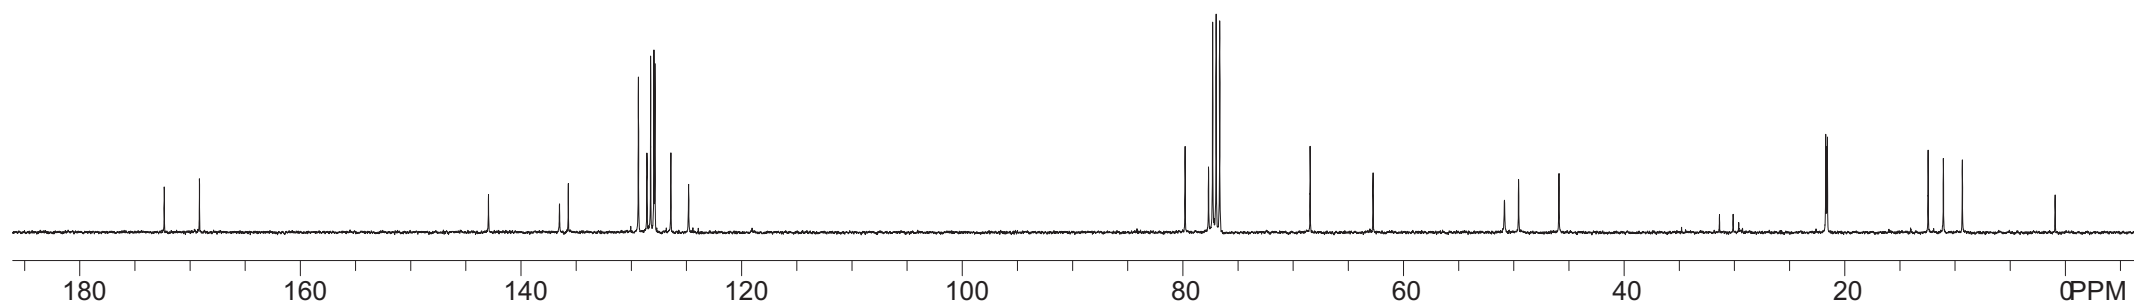

7.367  
7.348  
7.280  
7.262  
7.231  
7.223  
7.191  
7.172  
7.155  
7.047  
7.038

5.810  
5.695  
5.510

3.820

3.364  
3.355

2.790  
2.772  
2.754  
2.737  
1.947

1.504  
1.486  
1.403  
1.292  
1.274  
1.255  
1.237  
1.216  
1.182  
1.168  
1.155  
1.141  
1.124  
1.060  
1.045  
1.032  
1.019  
1.005  
0.887  
0.872  
0.860  
0.847  
0.832  
0.000

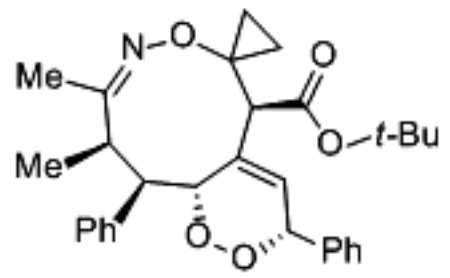

*cis*-3ah

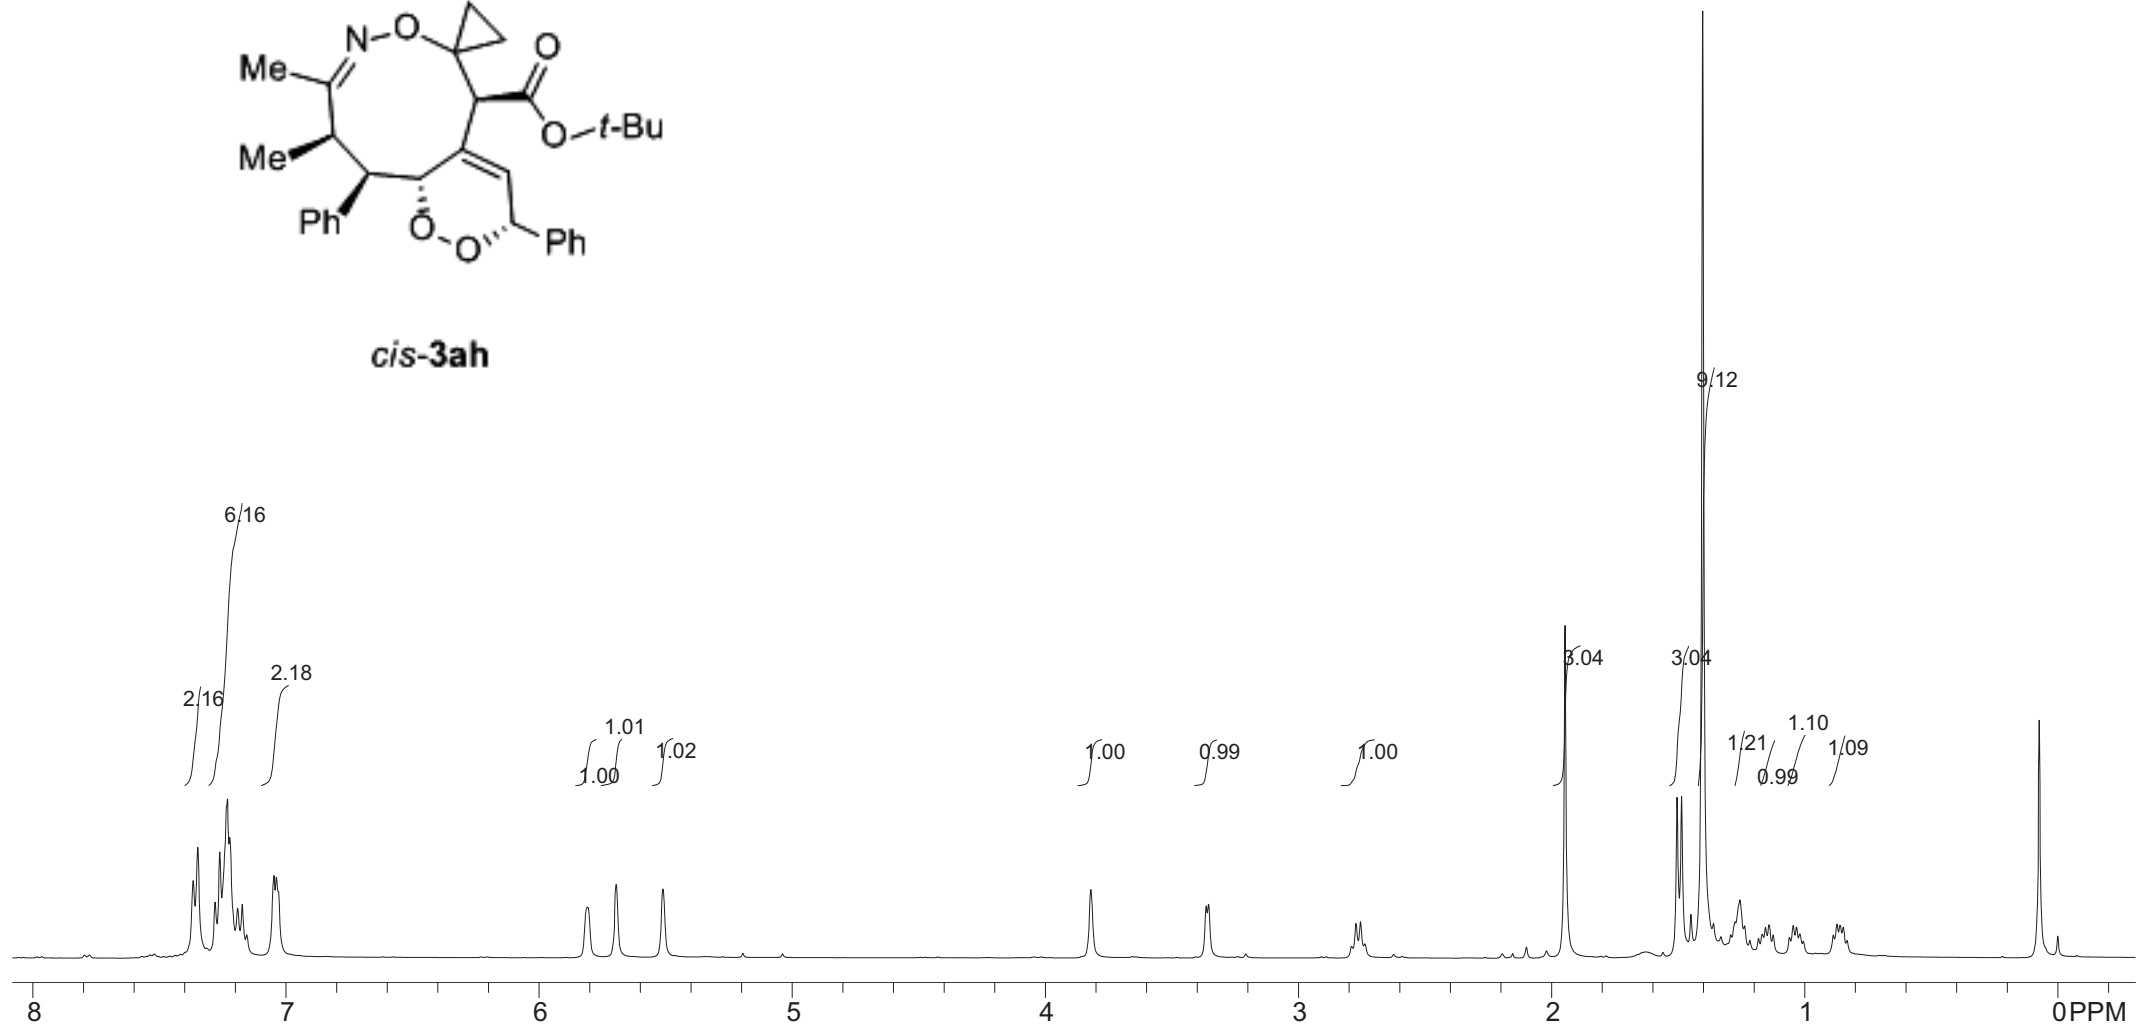

172.373  
168.968

142.981  
136.564  
136.112  
129.353  
128.551  
128.245  
127.917  
127.844  
126.385  
124.672

81.769  
79.785  
77.766  
77.321  
77.000  
76.686

62.862

50.889  
50.226  
45.822

27.921  
21.650

12.594  
10.983  
9.335

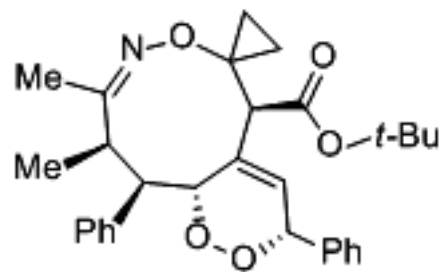

*cis*-3ah

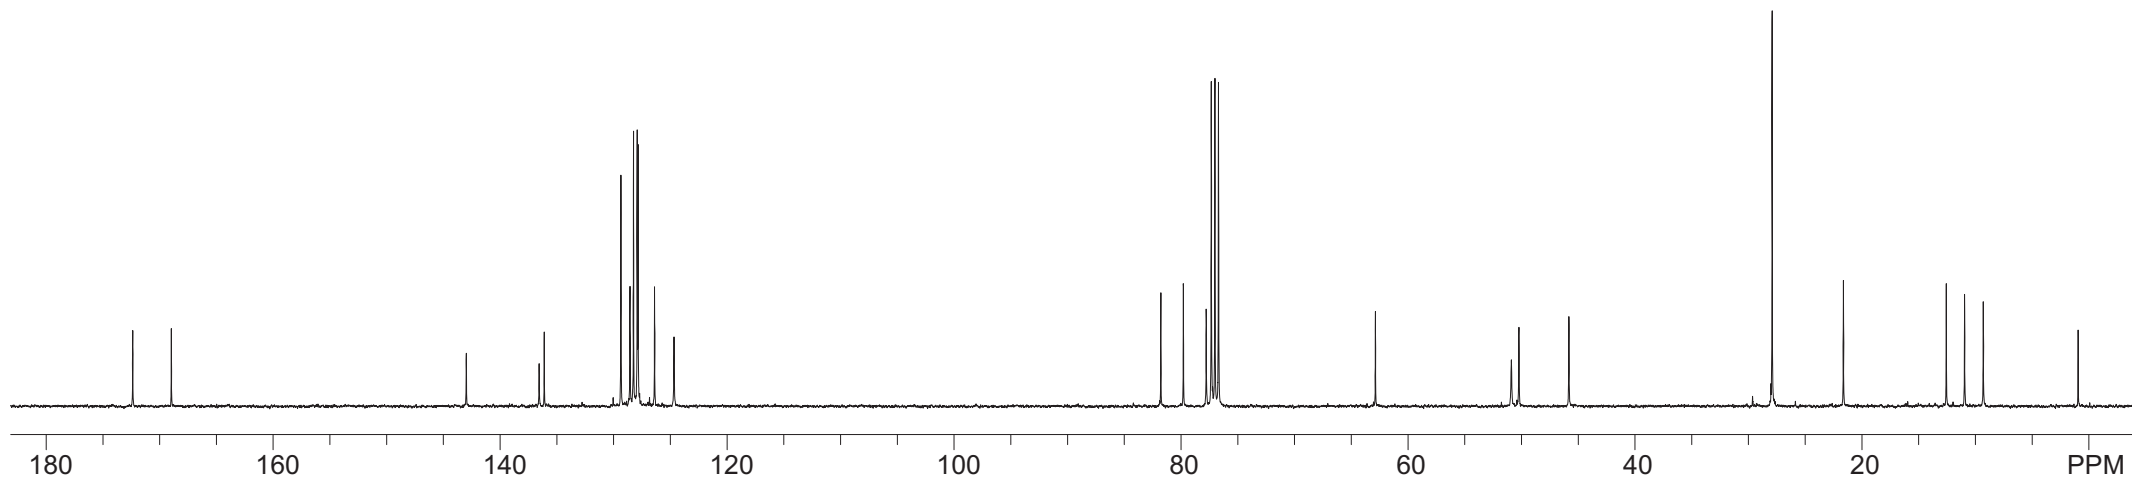

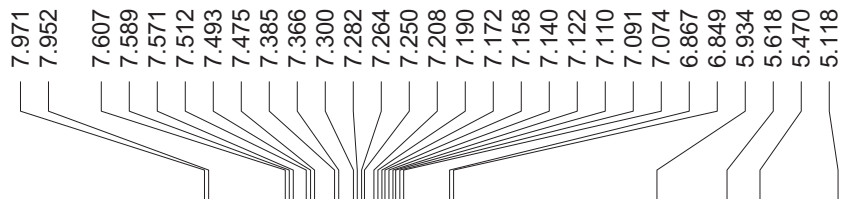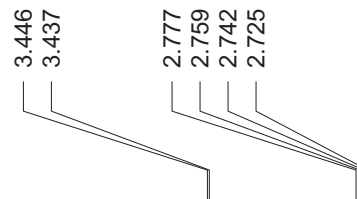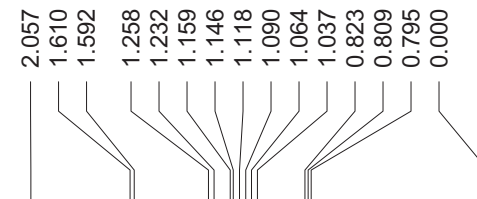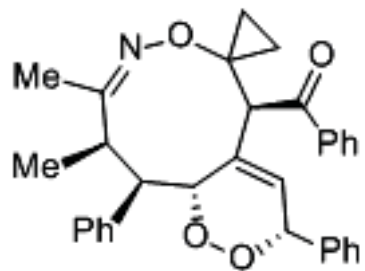

*cis-3ai*

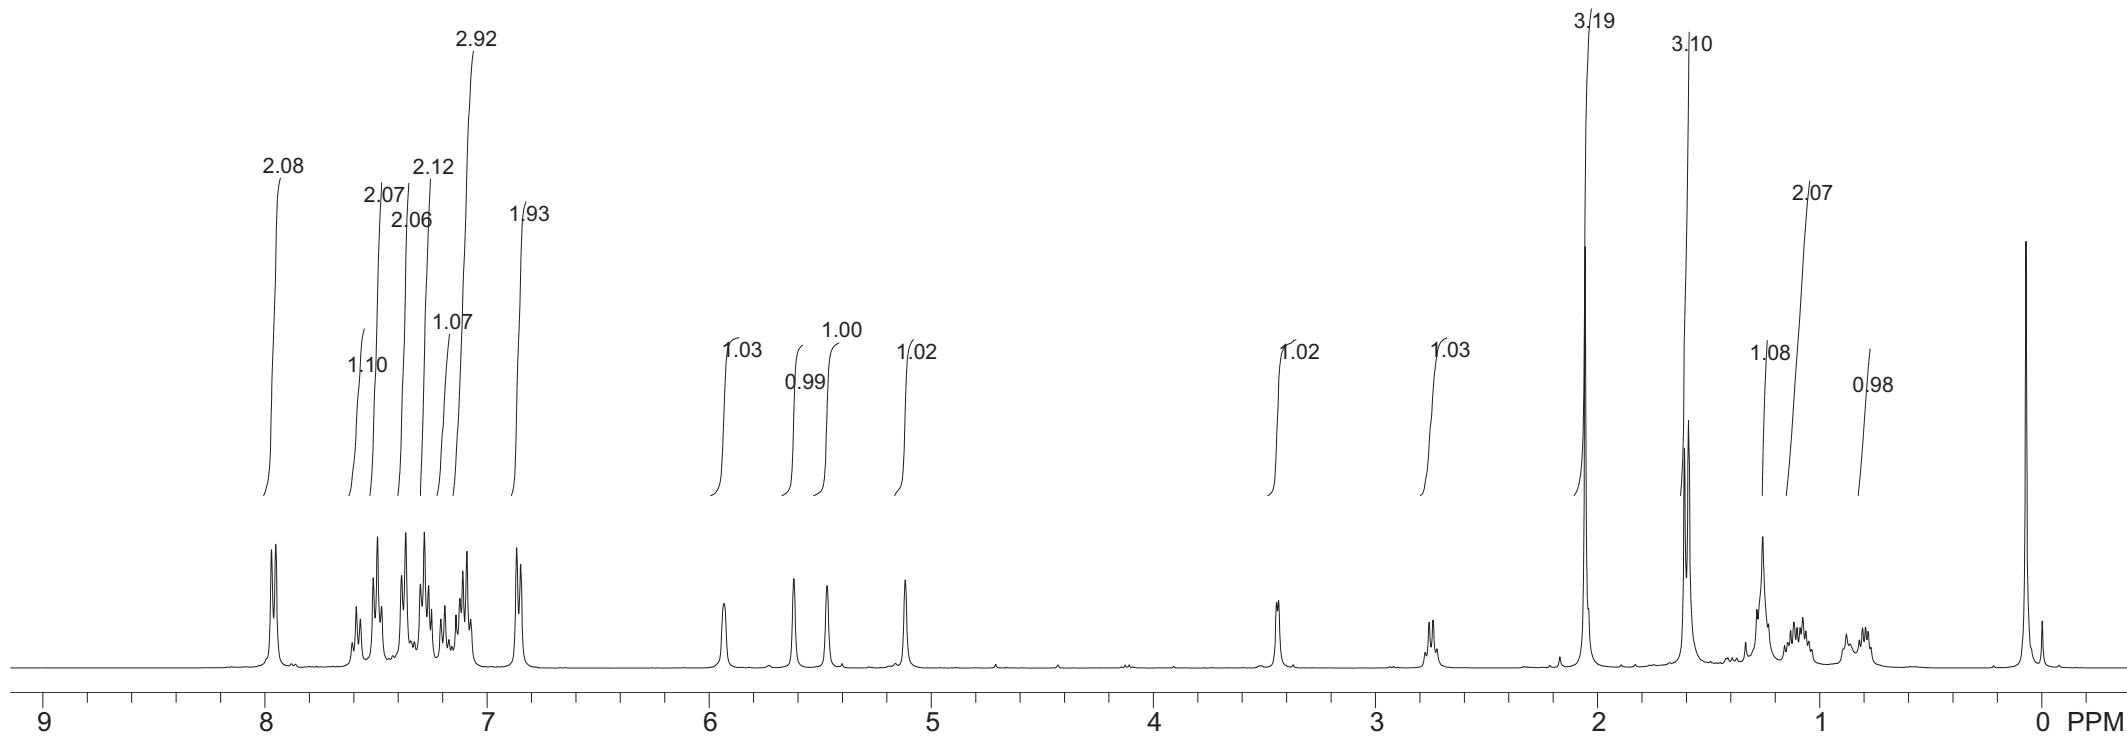

197.295

172.373

142.828

138.300

136.542

135.988

133.371

129.273

128.806

128.398

128.194

128.121

127.960

127.836

126.553

125.758

79.836

77.394

77.321

77.000

76.679

63.000

50.882

47.047

46.791

22.059

12.128

11.449

9.189

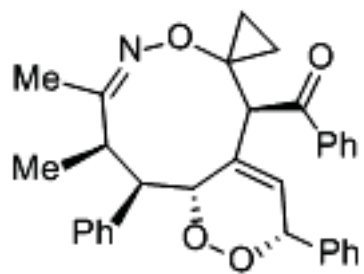

*cis-3ai*

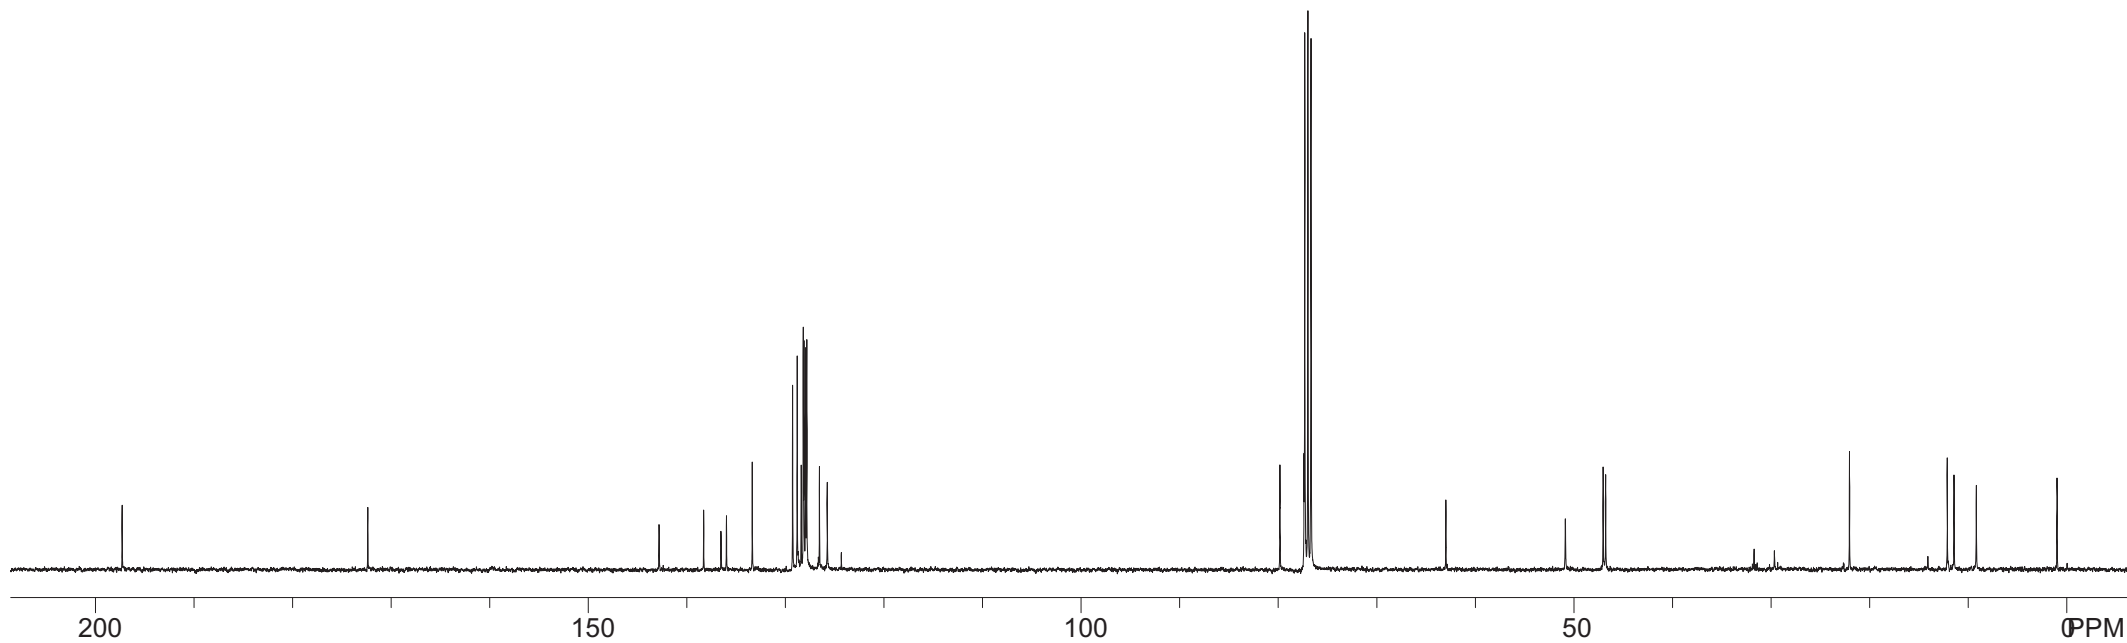

9.888

7.366  
7.348  
7.328  
7.309  
7.292  
7.275  
7.259  
7.240  
7.222  
7.204  
7.187  
5.794

5.549  
5.512

3.202  
3.190  
3.173  
3.159  
3.143  
3.127  
3.112  
2.964  
2.950  
2.915  
2.901  
2.878  
2.863  
2.849  
2.468  
2.453  
2.437  
2.421  
1.832  
0.928  
0.910

-0.000

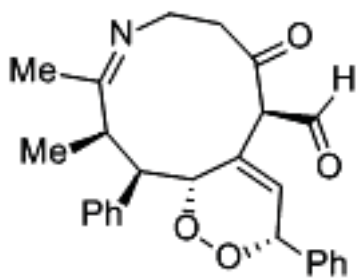

*cis-3aj*

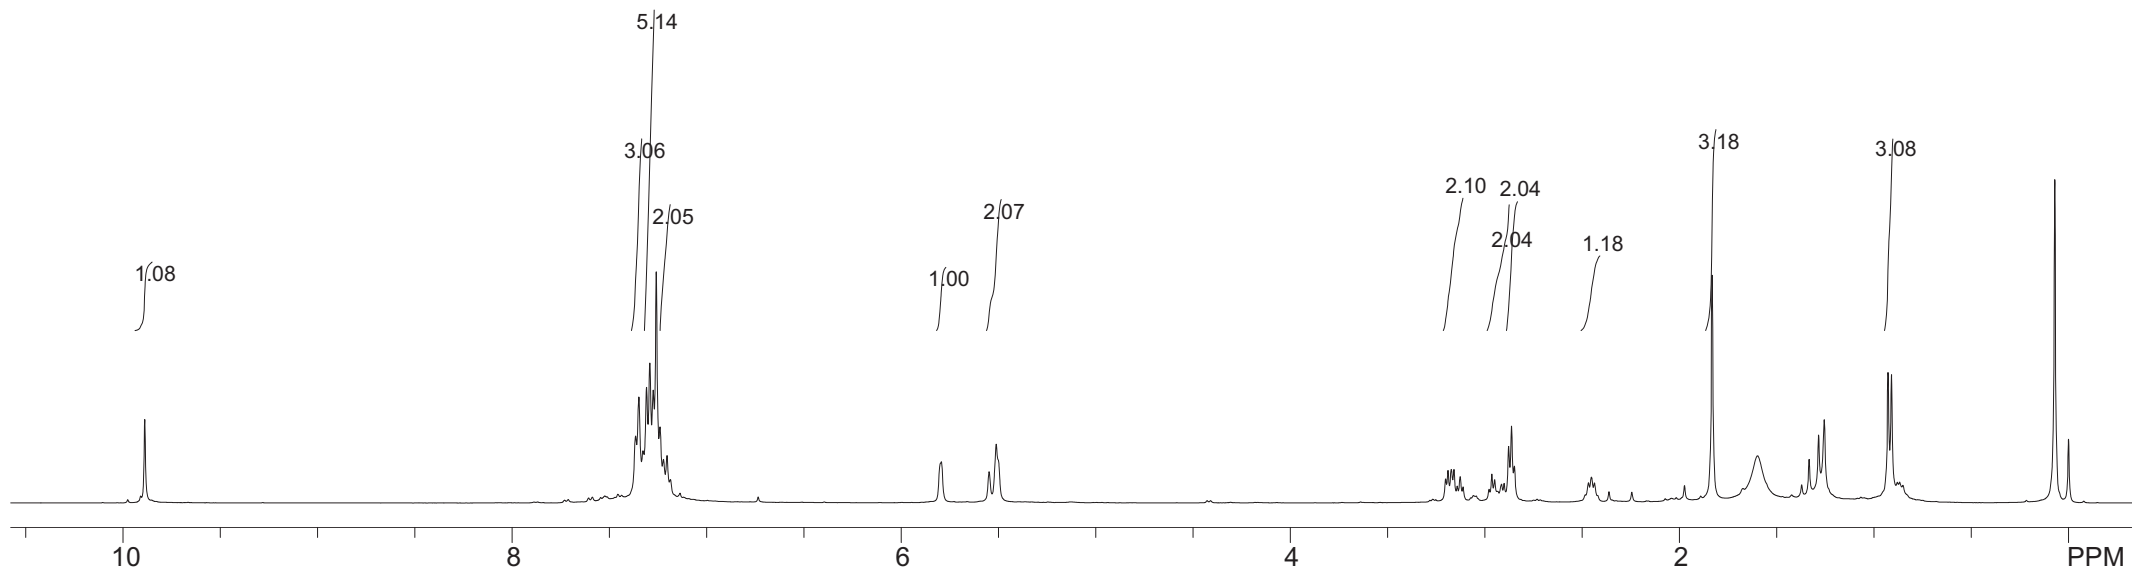



206.105  
200.068

140.000  
139.118  
138.309  
133.314  
132.753  
128.407  
128.334  
128.268  
128.203  
126.737  
119.052

80.735  
77.323  
77.009  
76.688  
73.269

46.407  
42.622  
36.928  
36.067

19.137  
14.135

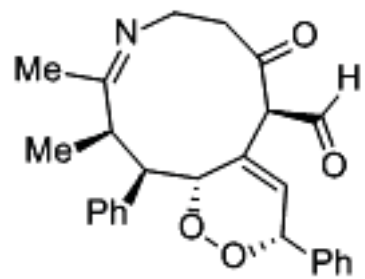

*cis-3aj*

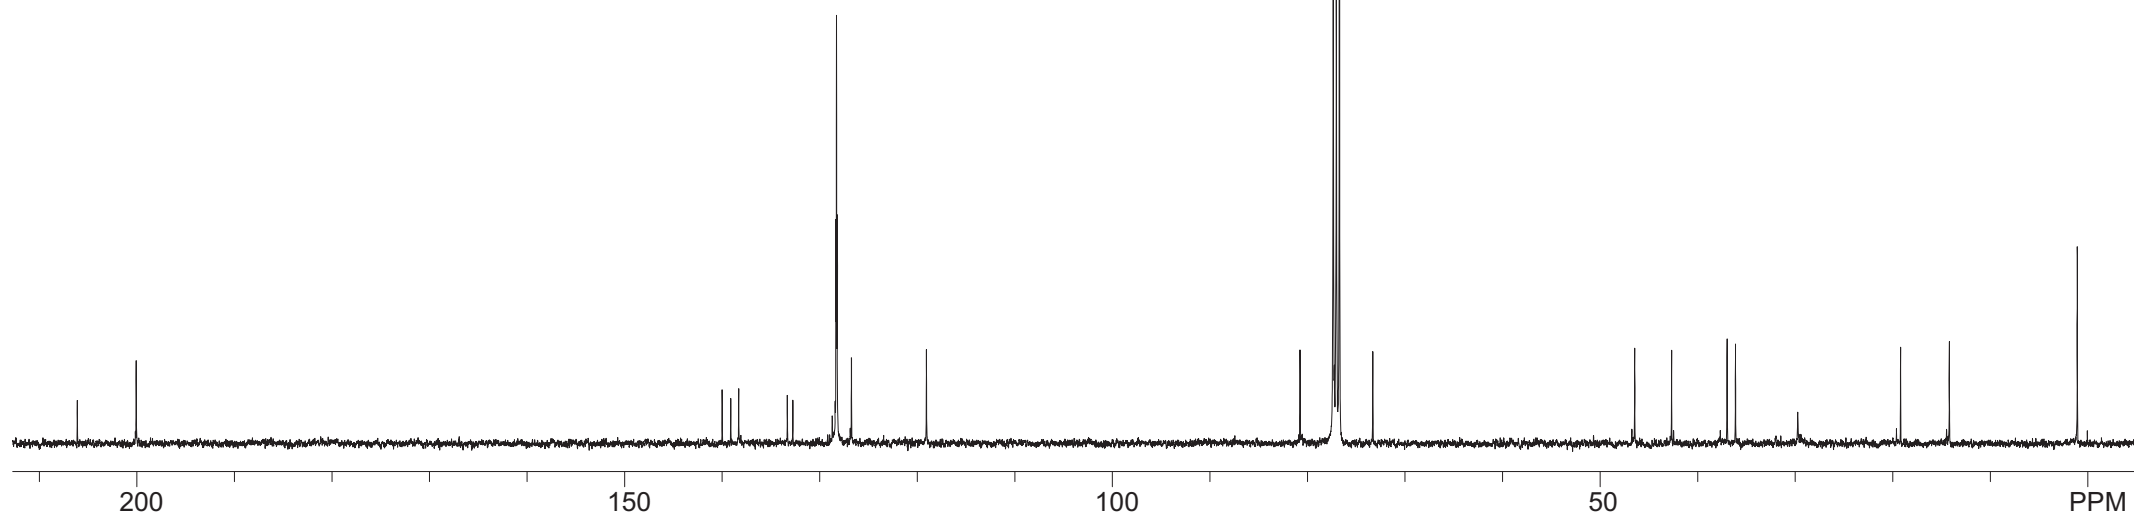

7.380  
7.362  
7.289  
7.270  
7.256  
7.231  
7.221  
7.198  
7.180  
7.037  
7.027

5.829  
5.648  
5.505  
4.586  
4.576  
3.936

3.367  
3.358

2.761  
2.743

2.324  
2.313  
2.285  
2.250  
2.107

2.008  
1.962  
1.861  
1.835  
1.799  
1.786  
1.659  
1.605  
1.547  
1.516  
1.498  
1.451  
1.425  
1.412  
1.398  
1.378  
1.340  
1.323  
1.296  
1.256  
1.241  
1.209  
1.144  
1.114  
1.093  
1.049  
1.020  
0.990  
0.916  
0.900  
0.869  
0.854  
0.669  
0.000

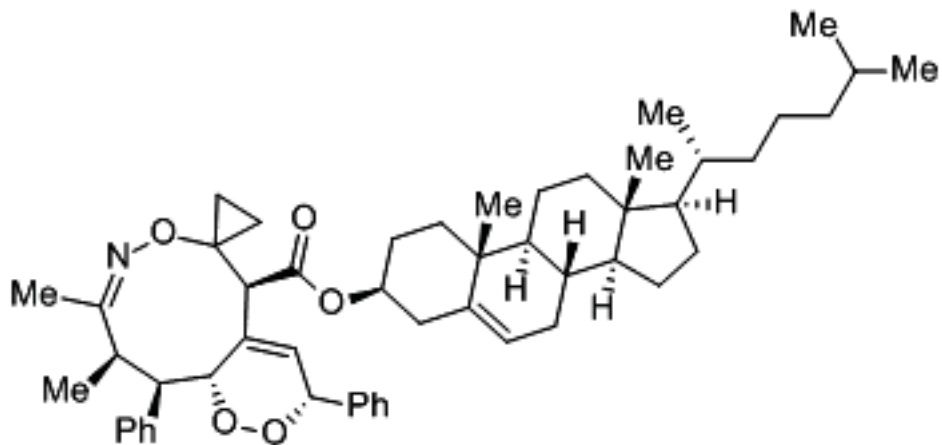

*cis-3ak*  
(dr = 1/1)

14.11  
4.23  
4.07

2.00  
2.04  
1.95

2.13

1.96

2.03

2.06

6.27  
6.16  
5.97  
4.06

8.18  
5.99

12.23  
14.30  
14.18

12.33  
6.19  
5.96

6.06

8 7 6 5 4 3 2 1 0 PPM

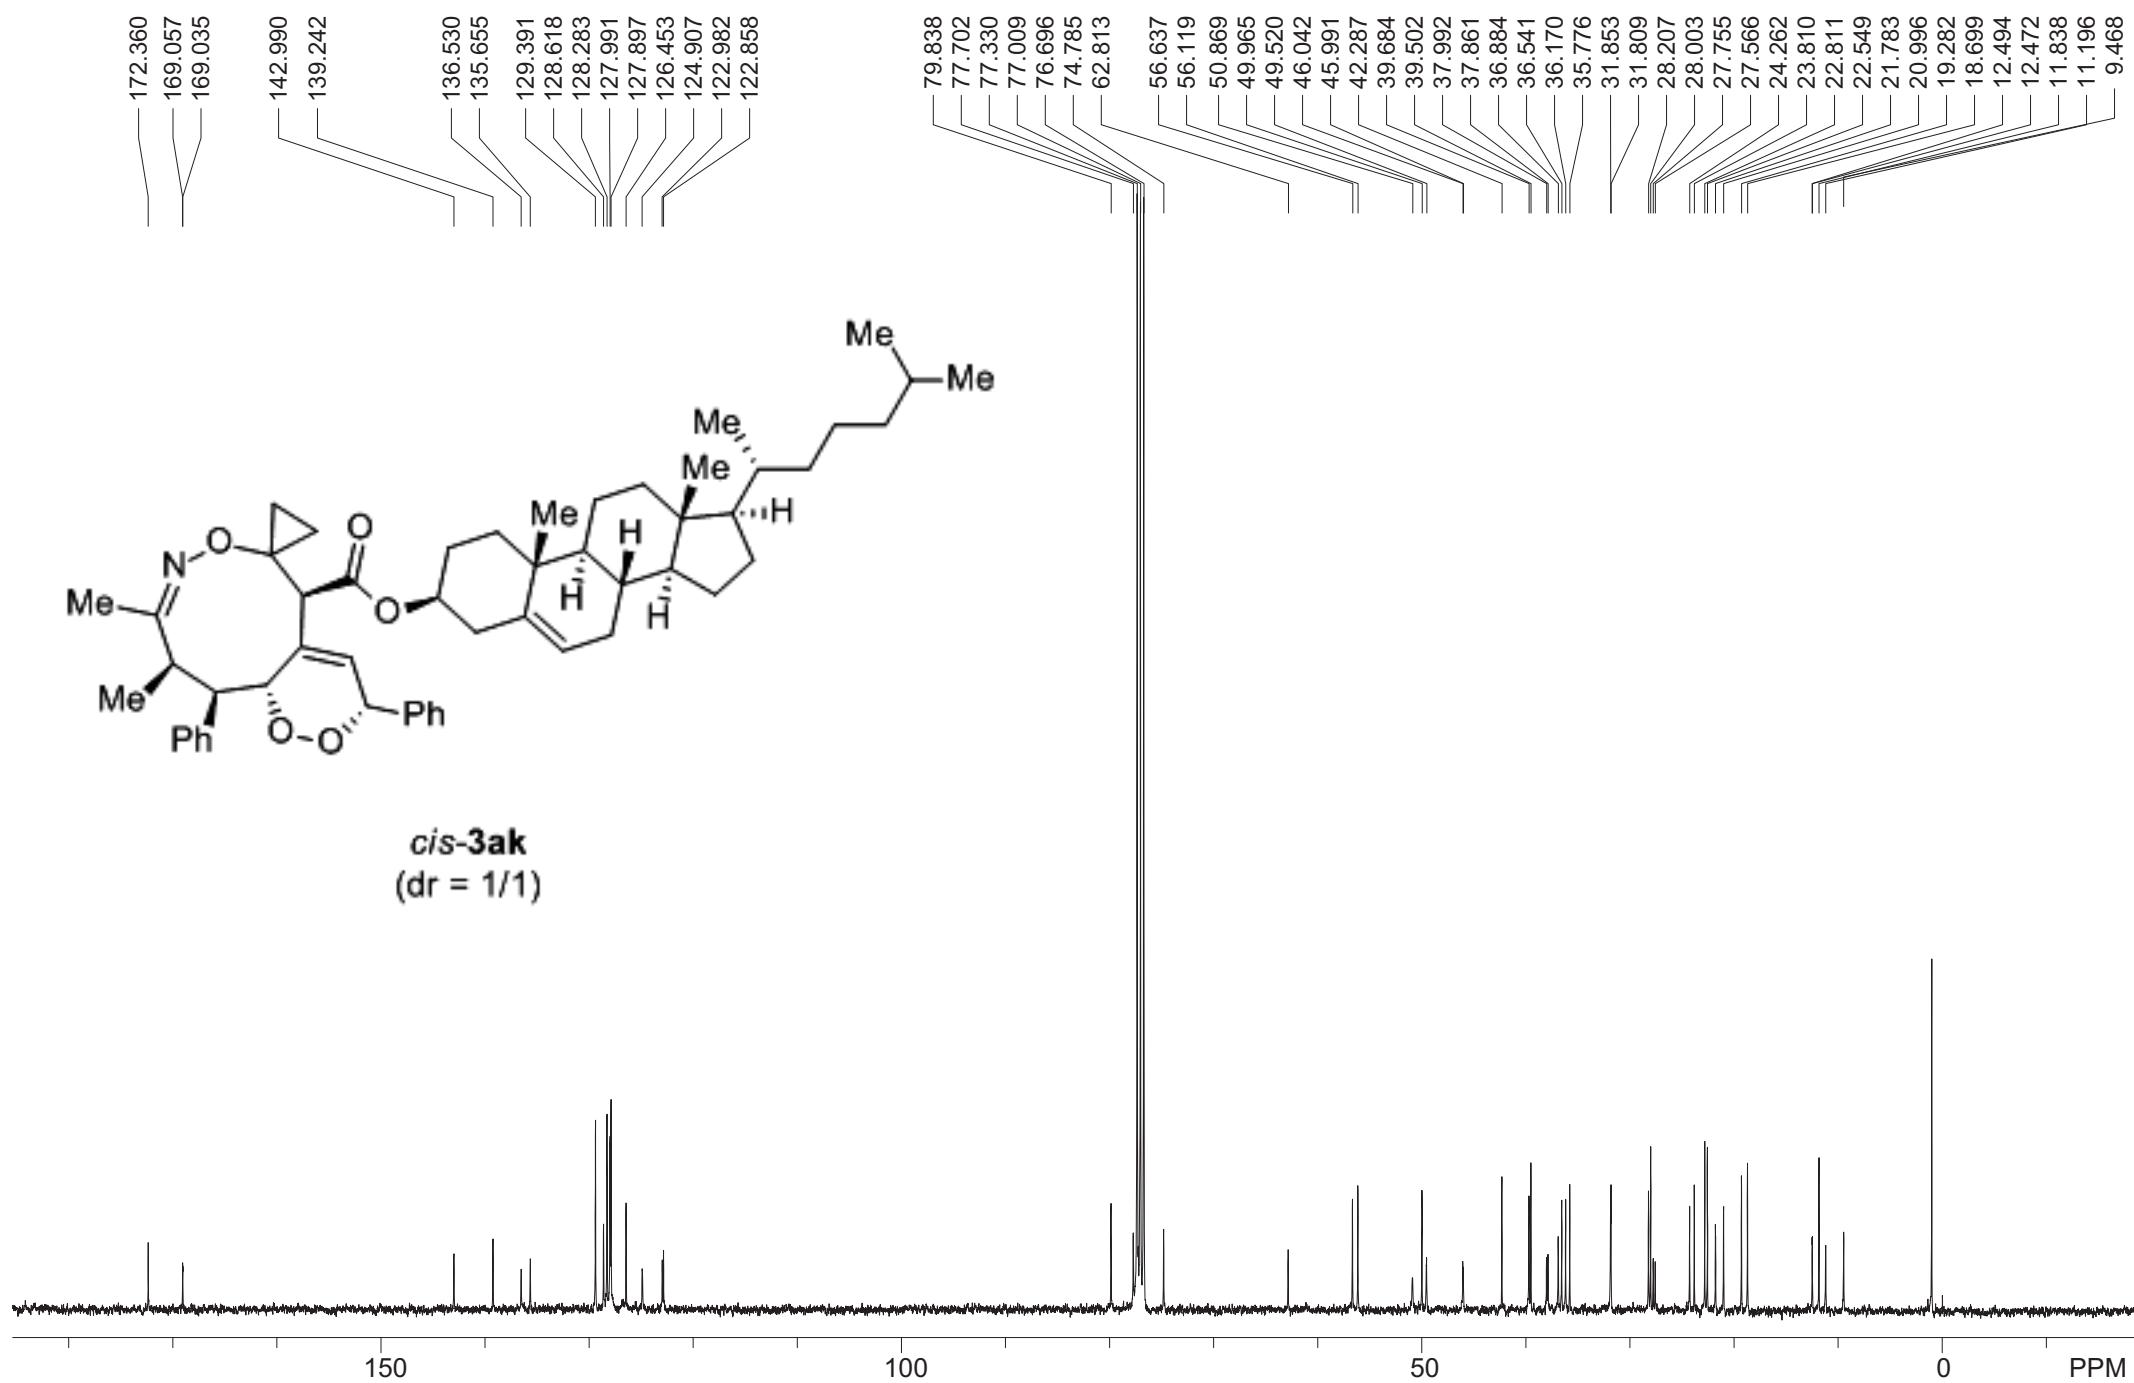

7.405  
7.374  
7.350  
7.333  
7.314  
7.288  
7.271  
7.259  
6.674  
6.634  
6.519  
6.284  
6.268  
6.252  
6.228  
6.213  
5.745

5.024  
4.766  
4.751

4.397  
3.873  
3.777

1.295  
1.229  
1.216  
1.202  
1.186  
1.170  
1.152  
1.129  
1.115  
1.103  
1.087  
0.884  
0.869  
0.858  
0.845  
0.829  
0.000

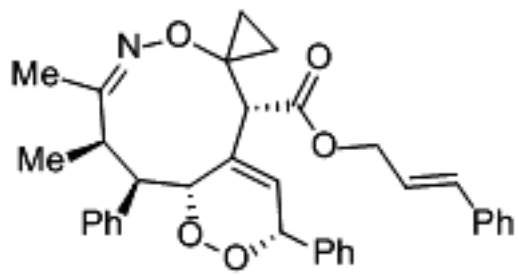

*trans*-3aa

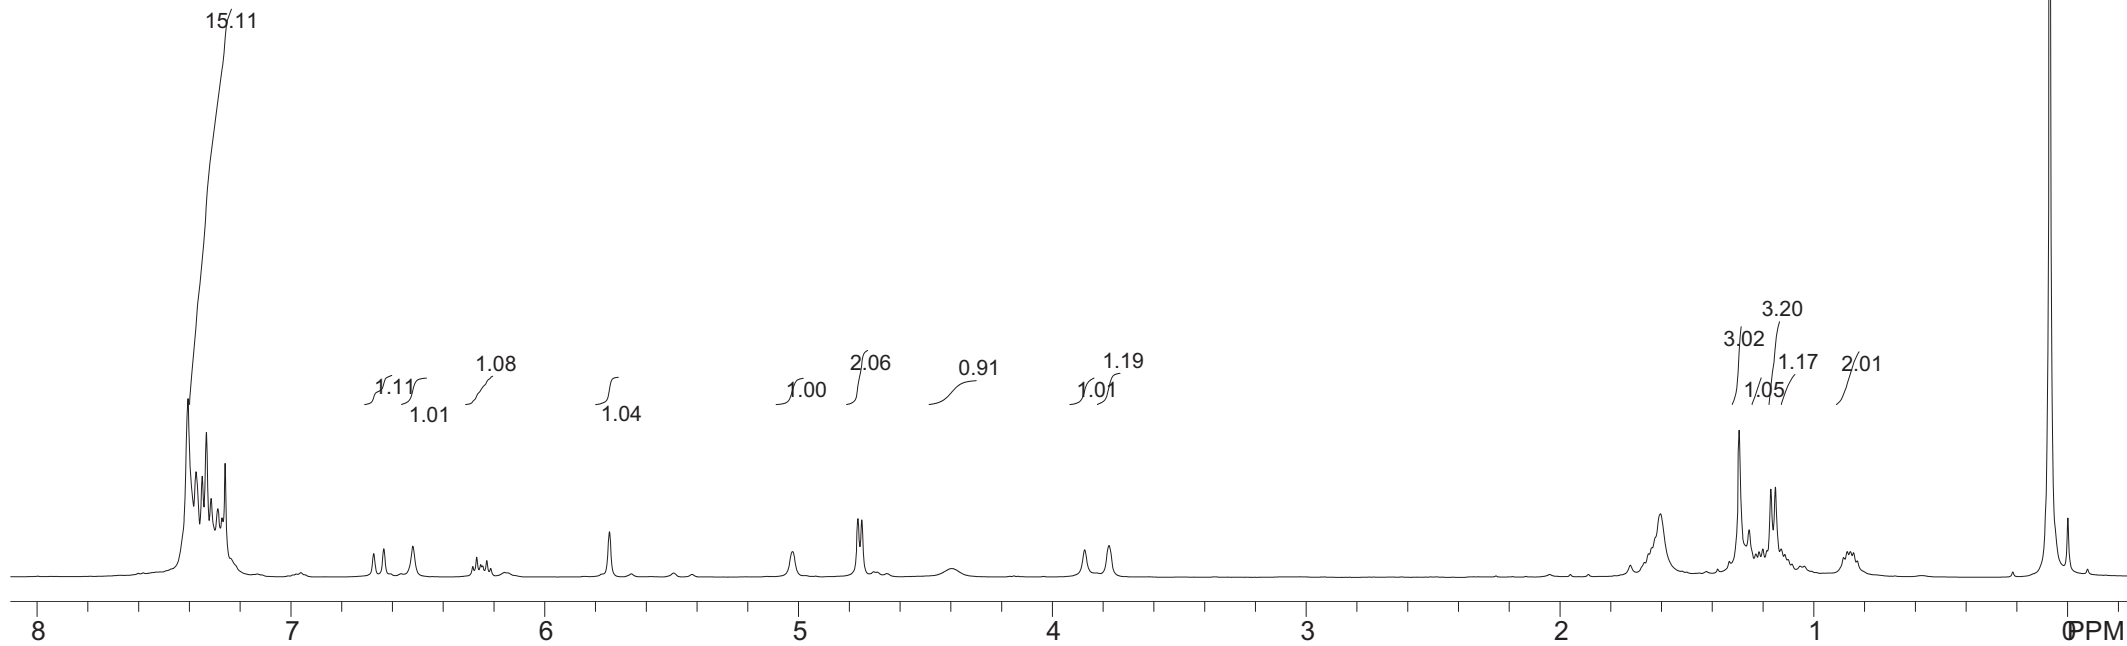

174.509  
169.719  
140.786  
136.025  
135.609  
135.237  
134.486  
130.082  
129.455  
129.142  
128.879  
128.638  
128.529  
128.179  
127.836  
127.042  
126.633  
122.390

85.743  
81.178  
77.314  
77.000  
76.679  
65.574  
63.277  
59.165  
48.279  
35.752  
18.092  
17.356  
10.604  
10.137

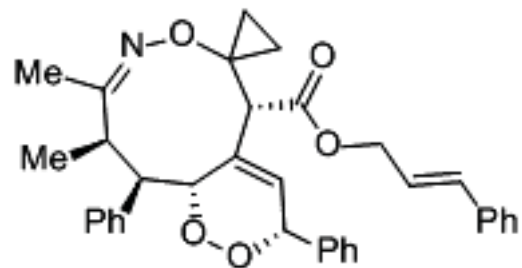

*trans*-3aa

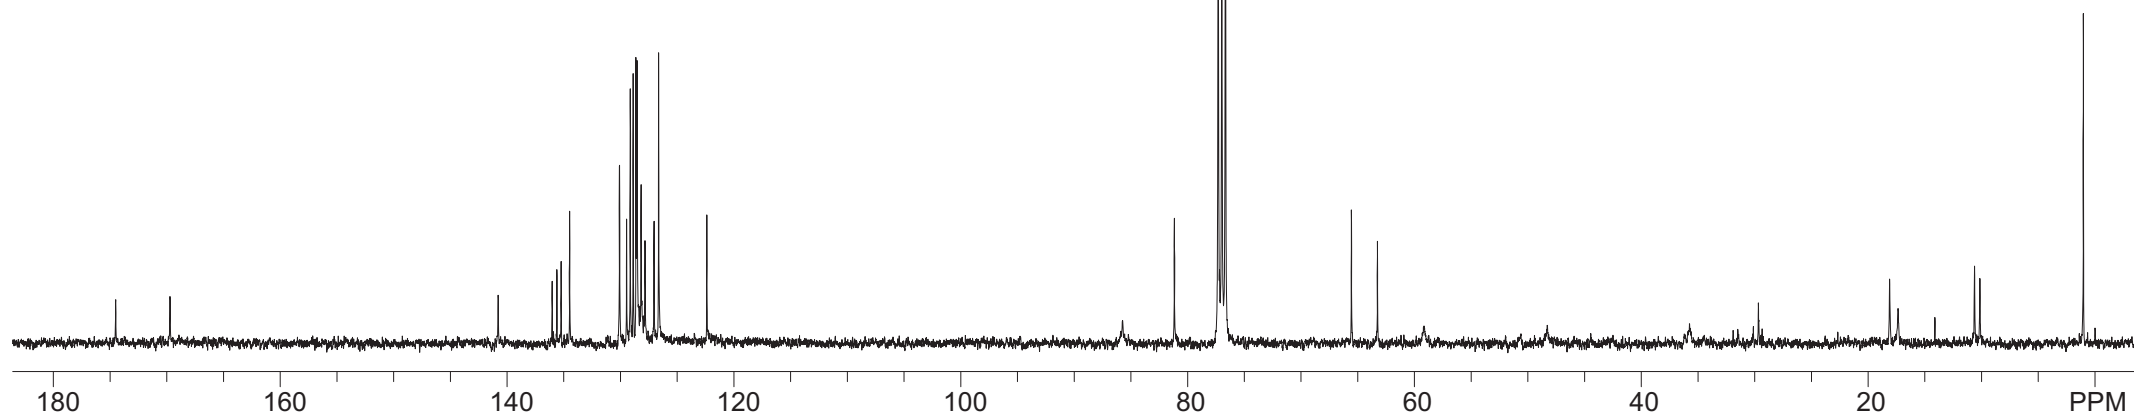

7.383  
7.374  
7.370  
7.362  
7.265  
7.257  
7.253  
7.244

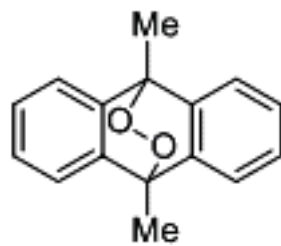

**5**

2.126

0.000

4.01  
4.00

6.05

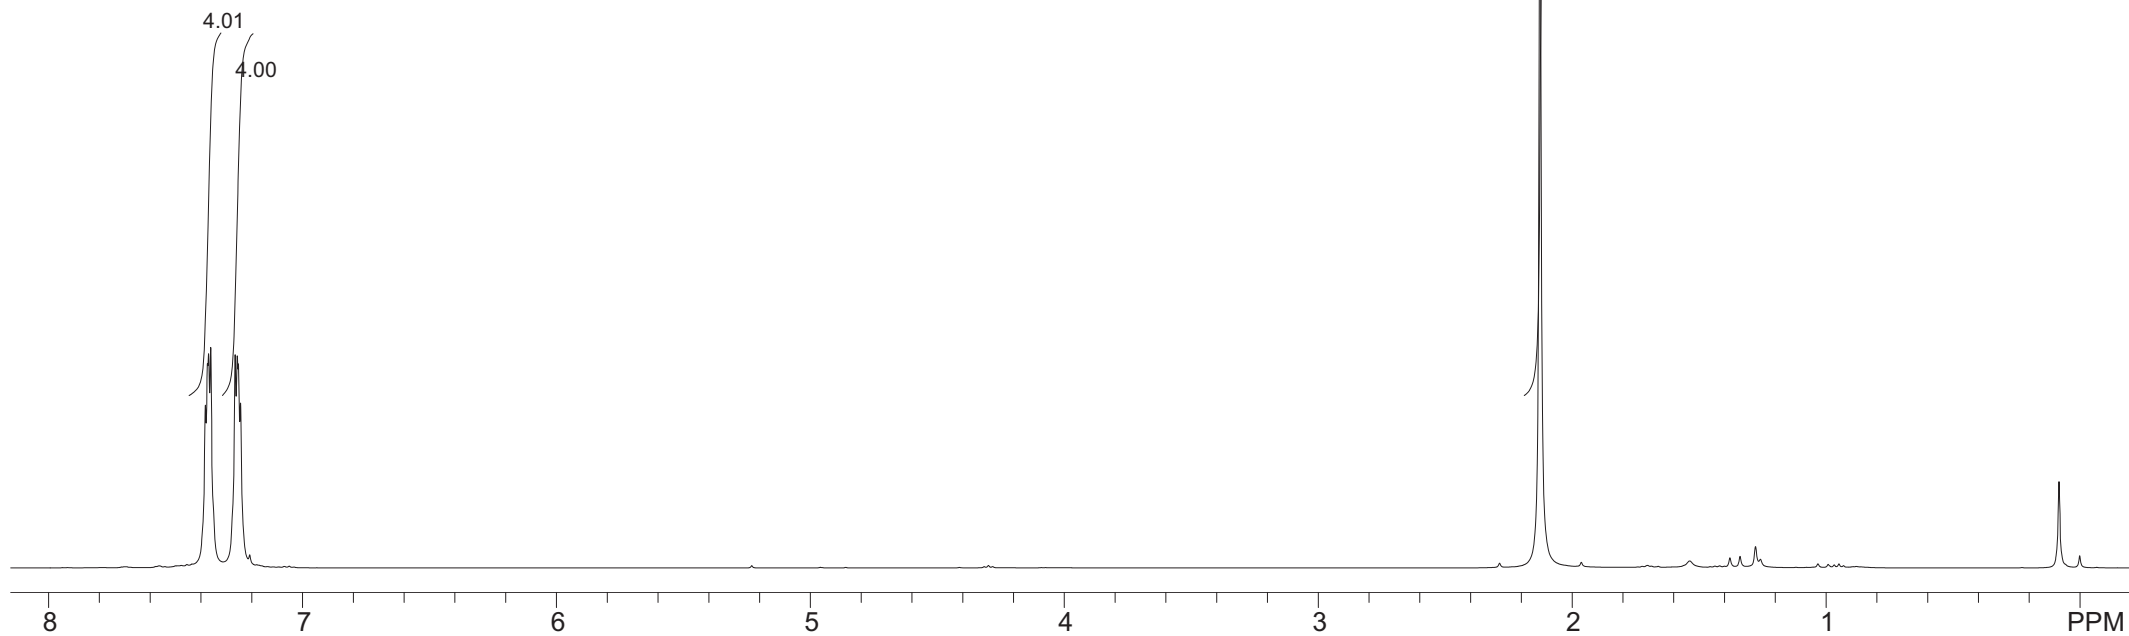

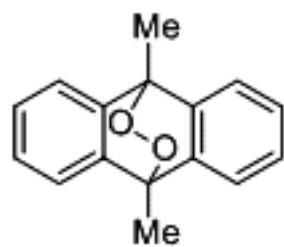

5

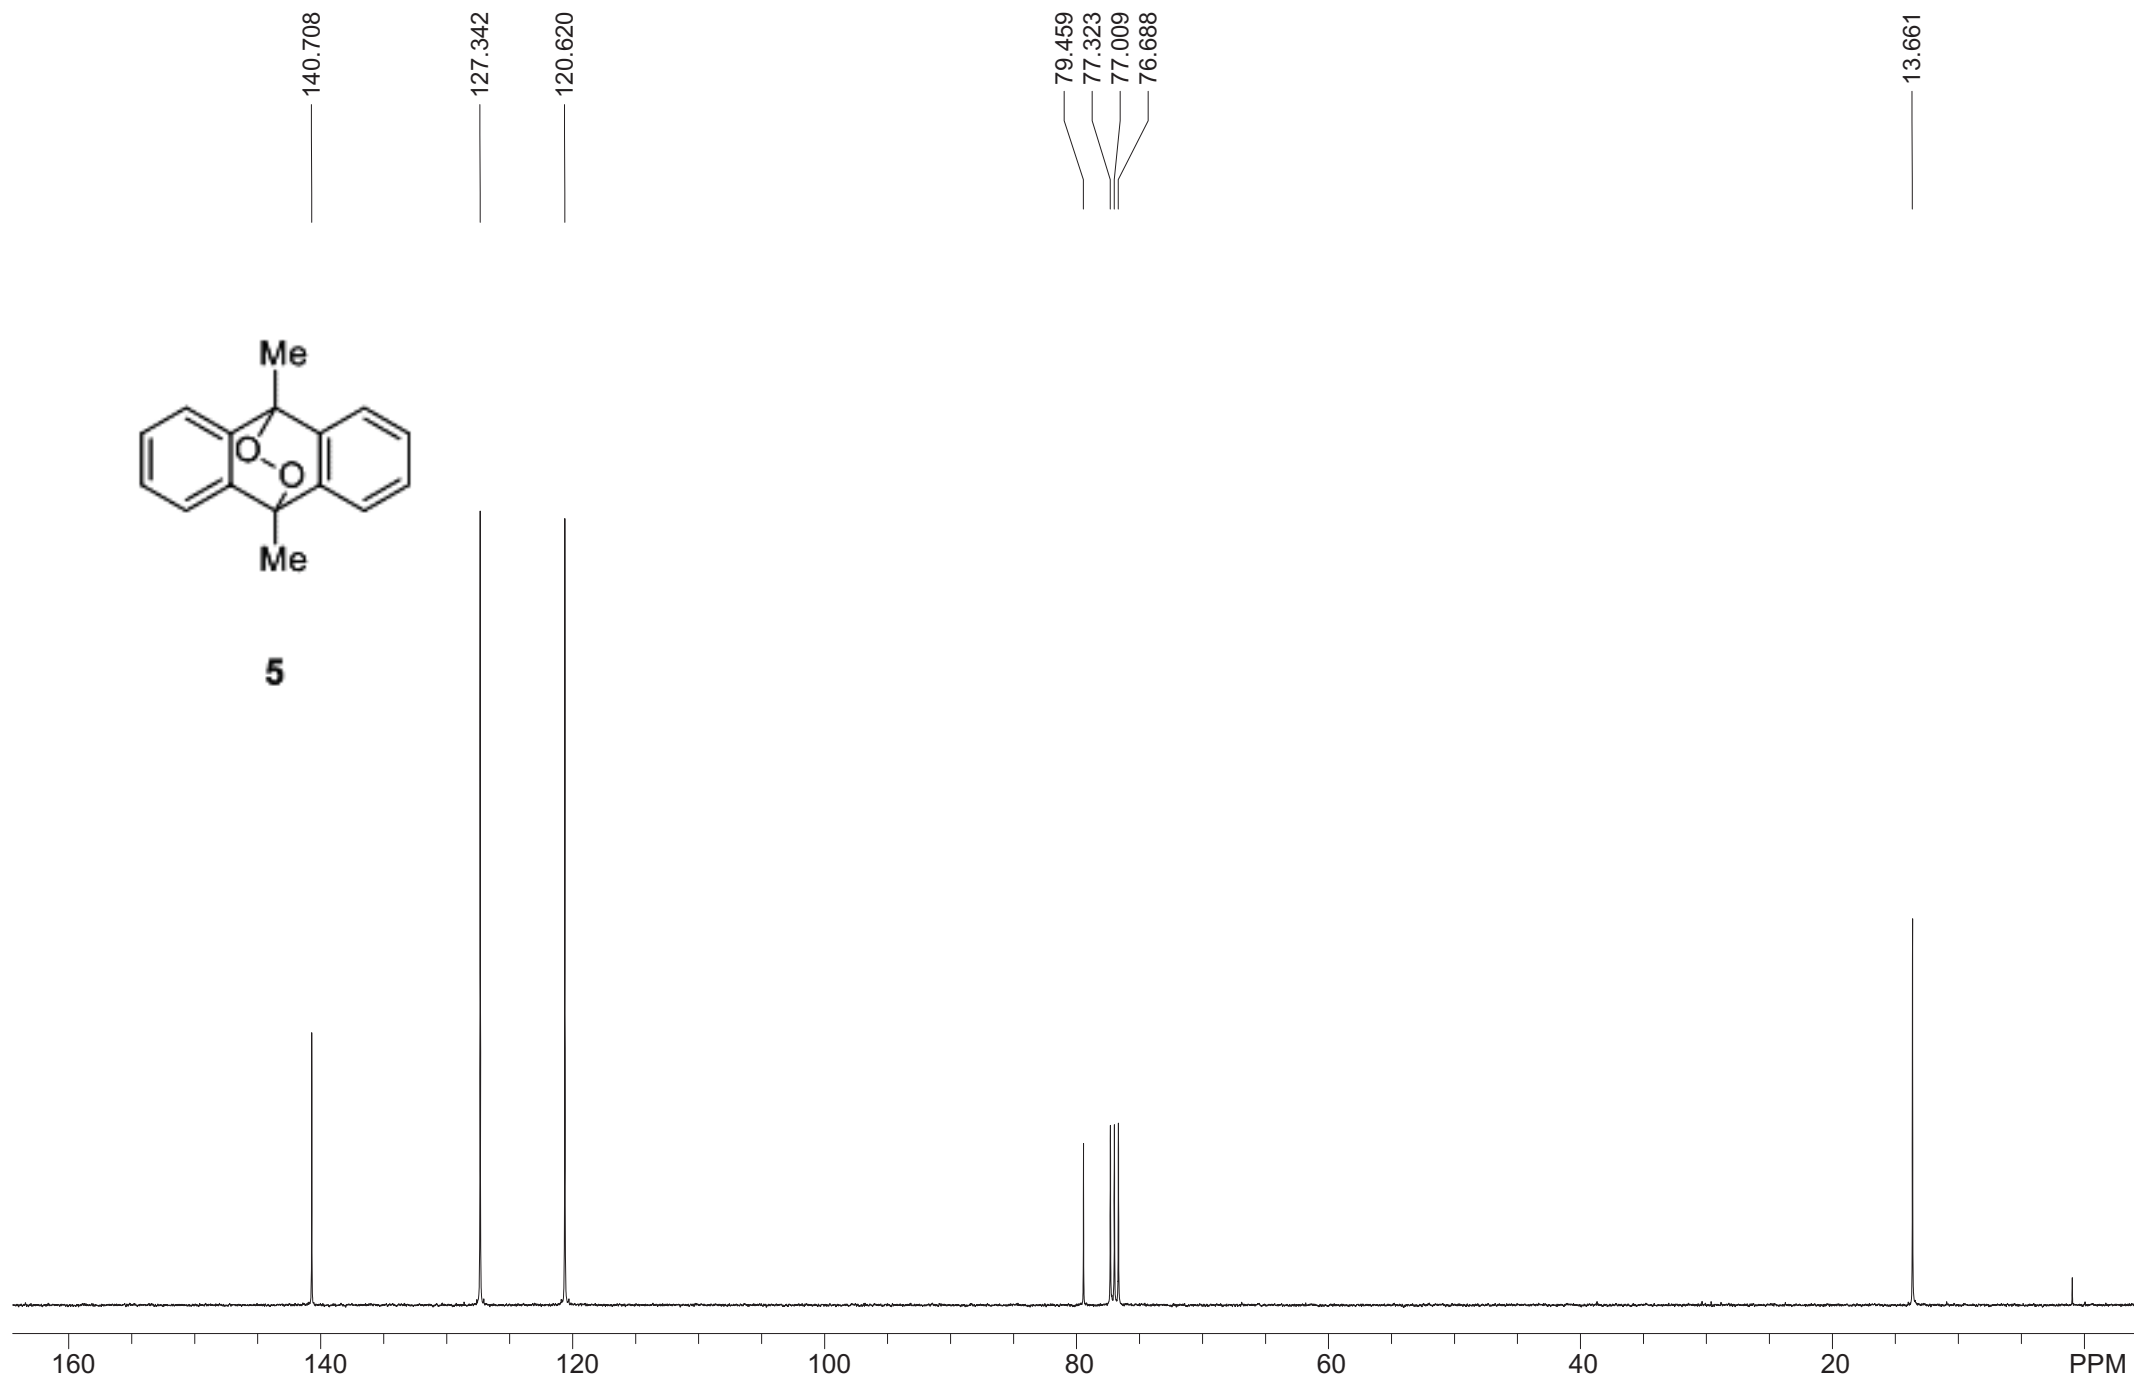

7.260  
7.242  
7.206  
7.187  
7.171  
7.117  
7.100  
7.081  
7.048  
7.039  
5.673

5.567  
5.560  
5.472

3.581  
3.565  
3.557  
3.541  
3.407  
3.396  
3.383  
3.191  
2.987  
2.970  
2.858  
1.795

1.363  
1.345  
1.095  
1.078  
1.066  
1.052  
1.037  
0.979  
0.965  
0.952  
0.938  
0.924  
0.875  
0.860  
0.849  
0.836  
0.821  
0.757  
0.739  
0.728  
0.719  
0.702  
-0.000

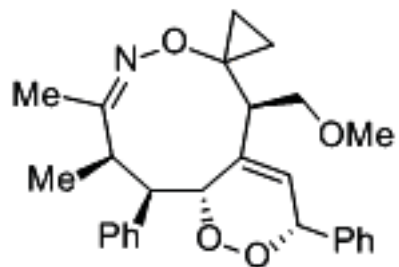

*cis-6aa*

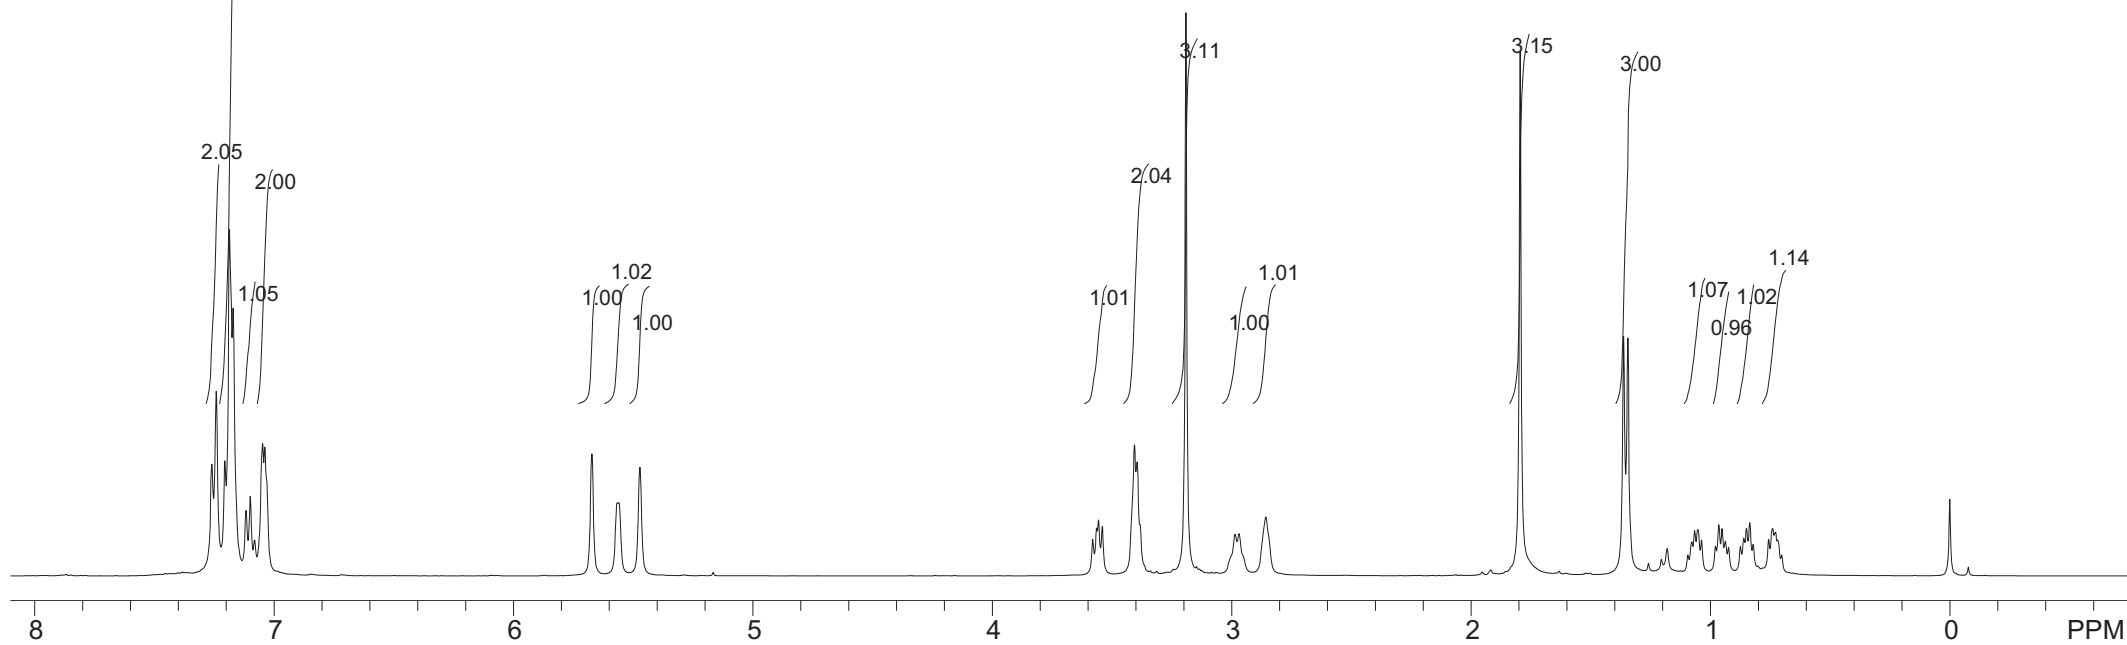



172.623

142.691

137.959

136.974

129.486

128.553

128.290

128.174

127.824

126.409

123.996

80.232

78.562

77.323

77.009

76.688

71.293

64.694

58.759

51.620

43.950

43.614

20.989

13.442

11.400

9.526

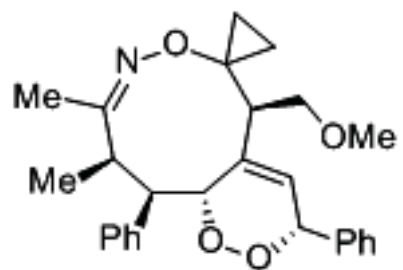

*cis-6aa*

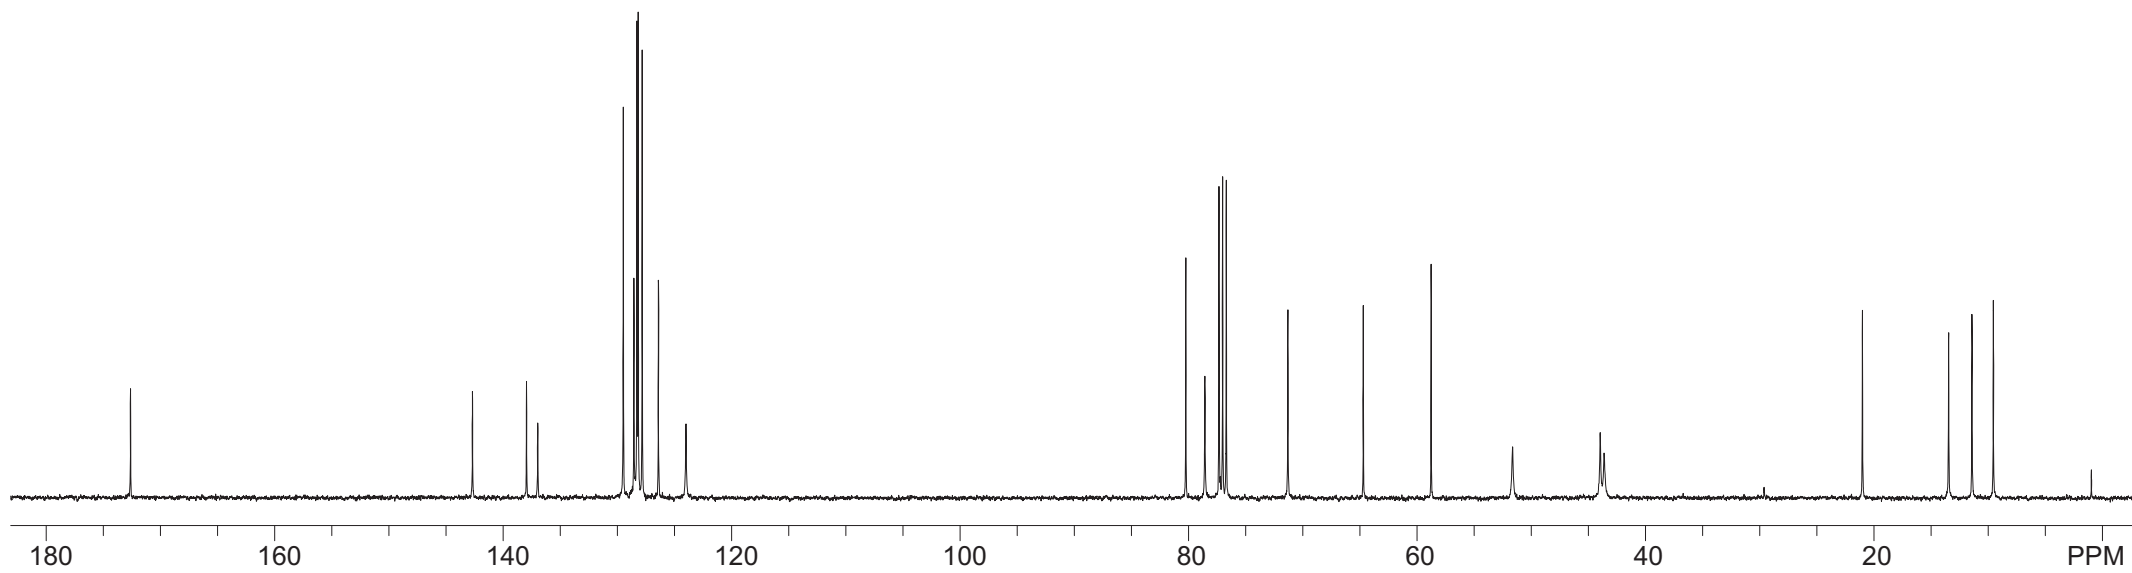

7.266  
7.251  
7.189  
7.173  
7.158  
7.121  
7.109

5.804  
5.587  
5.578  
5.552

4.491  
4.461  
4.405  
4.375

3.727  
3.703  
3.685  
3.641  
3.632  
3.617  
3.608  
3.480  
3.472  
3.080  
3.064  
2.956  
1.838

1.403  
1.385  
1.124  
1.113  
1.098  
1.085  
1.055  
1.043  
1.030  
1.016  
1.004  
0.929  
0.915  
0.903  
0.890  
0.878  
0.852  
0.837  
0.827  
0.816  
0.800  
0.000

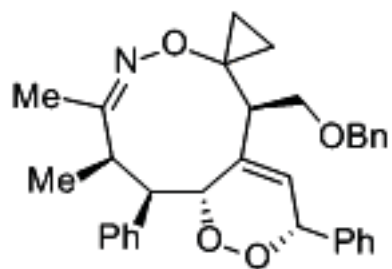

*cis-6ab*

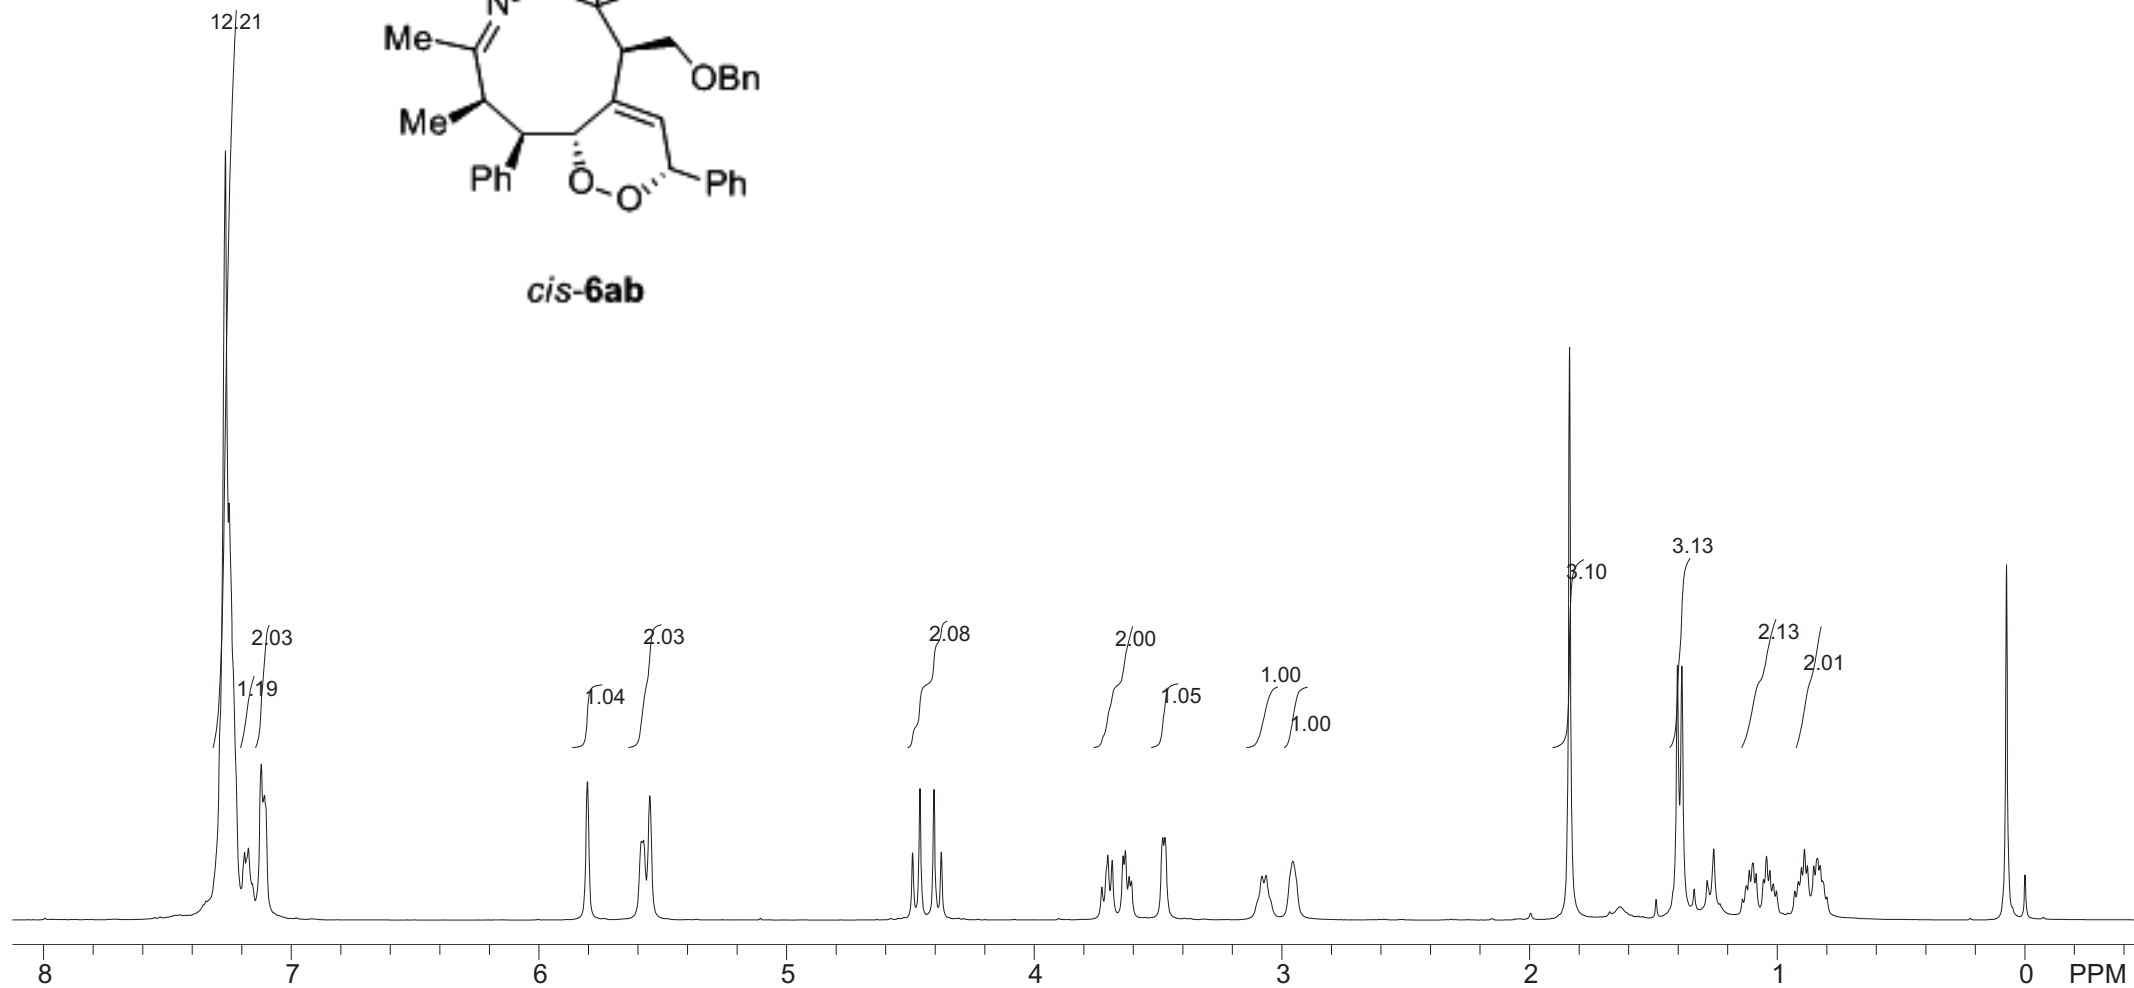

172.737

142.645  
137.789  
137.592  
136.973  
129.484  
128.551  
128.361  
128.310  
128.208  
127.866  
127.844  
127.698  
126.393  
124.519

80.310  
78.502  
77.314  
77.000  
76.679  
73.383  
68.870  
64.801

51.713

44.086  
43.620

20.892

13.535  
11.318  
9.787

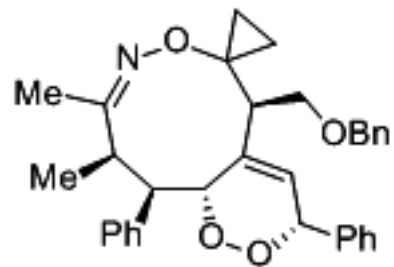

*cis-6ab*

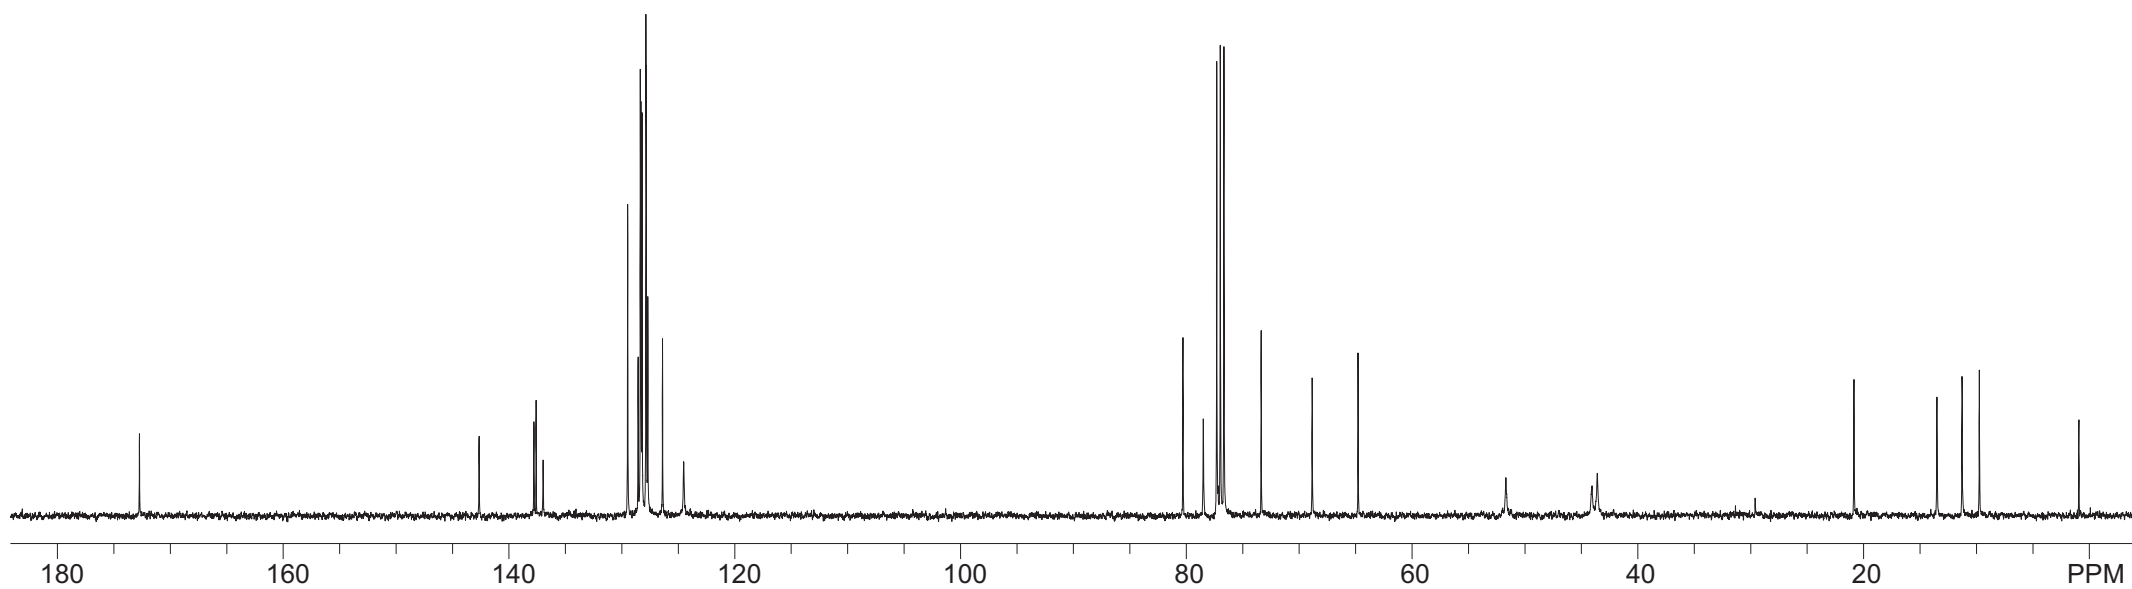

7.333  
7.315  
7.281  
7.264  
7.245  
7.196  
7.179  
7.160  
7.137  
7.128

5.891  
5.877  
5.865  
5.851  
5.835  
5.822  
5.796  
5.630  
5.622  
5.554  
5.250  
5.207  
5.170  
5.145

3.968  
3.954  
3.936  
3.922  
3.905  
3.891  
3.874  
3.859  
3.712  
3.694  
3.688  
3.671  
3.594  
3.583  
3.569  
3.559  
3.500  
3.491  
3.098  
3.081  
2.935

1.862  
1.431  
1.413  
1.146  
1.134  
1.119  
1.106  
1.066  
1.052  
1.039  
1.025  
1.012  
0.956  
0.942  
0.931  
0.917  
0.903  
0.849  
0.832  
0.821  
0.812  
0.794  
-0.000

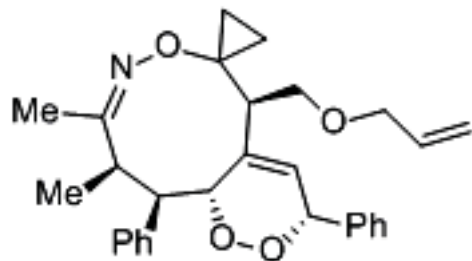

*cis-6ac*

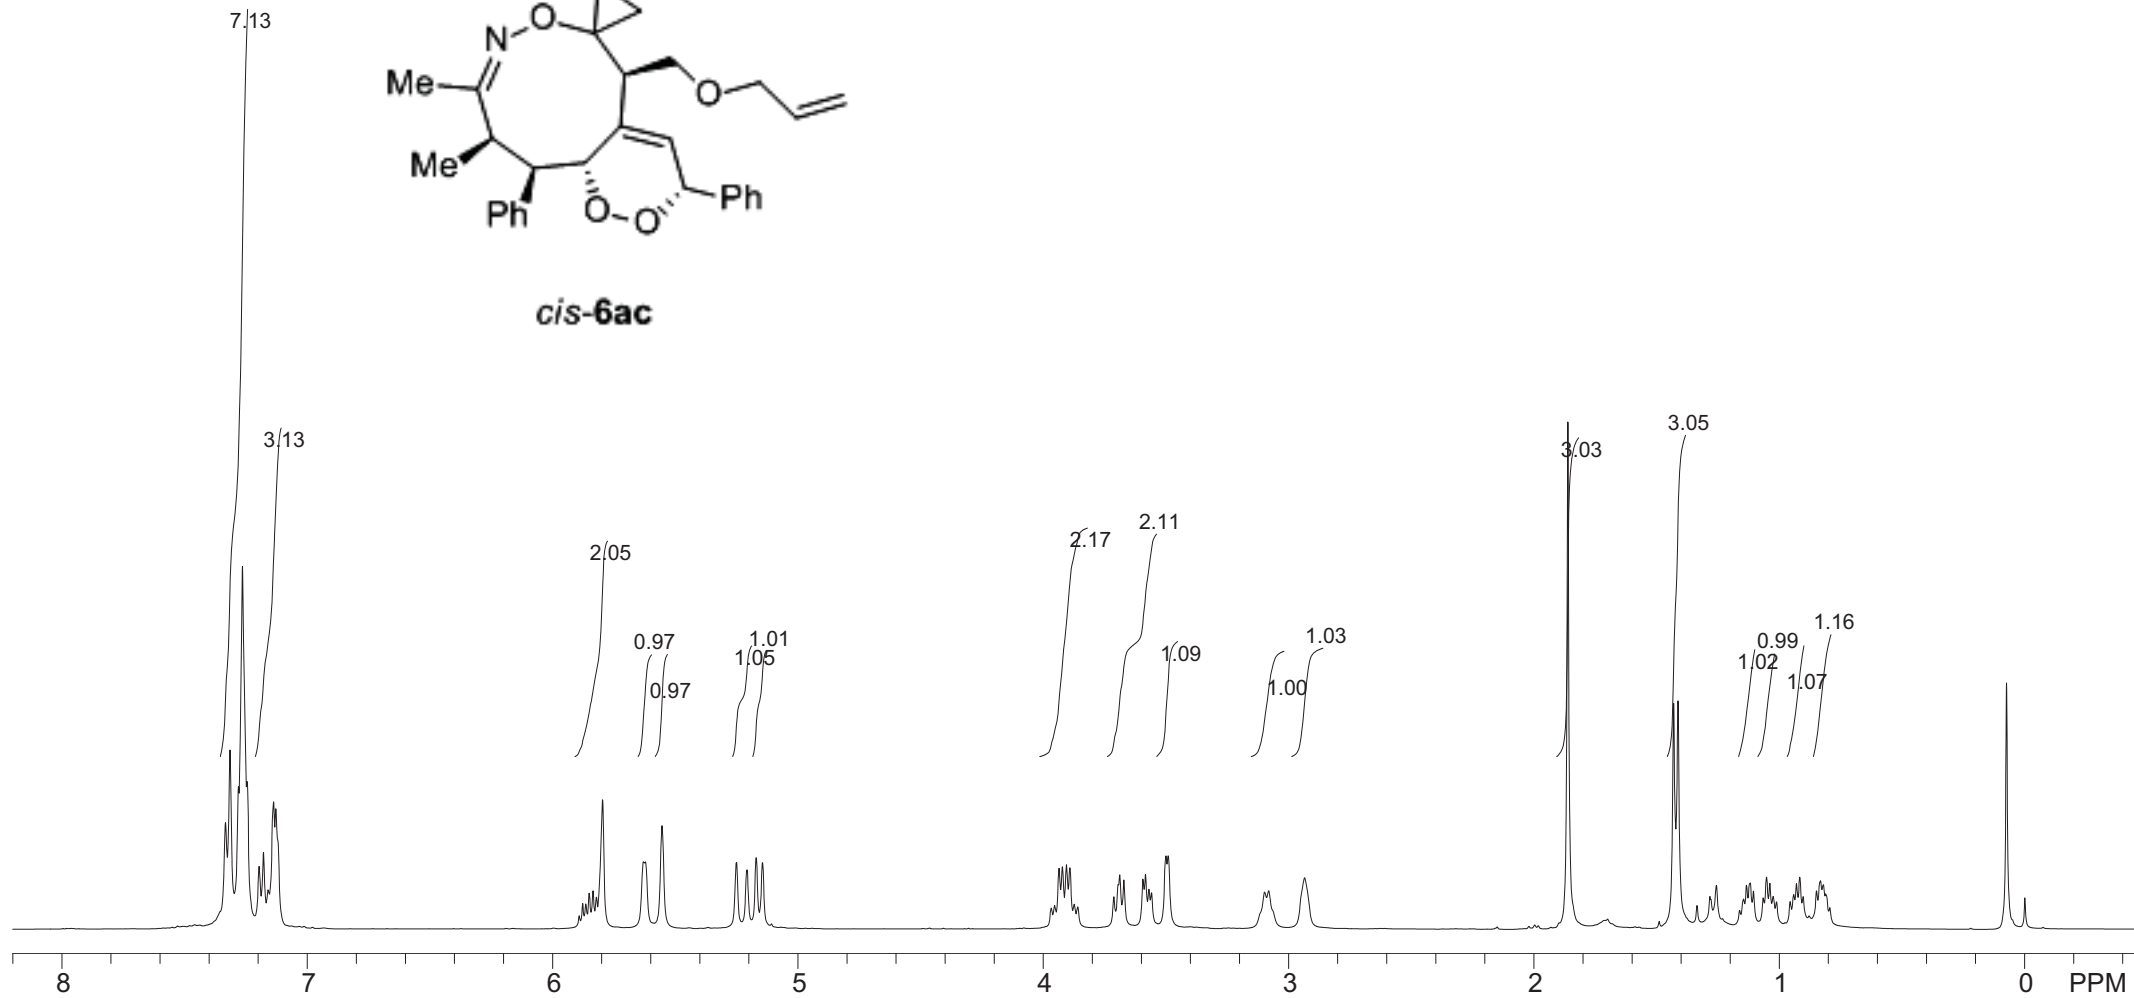

172.774

142.689  
137.848  
136.958  
134.260  
129.513  
128.580  
128.296  
128.252  
127.836  
126.422  
124.329  
117.359

80.303  
78.699  
77.321  
77.000  
76.687  
72.115  
68.812  
64.772

51.750

44.123  
43.729

20.928

13.630  
11.377  
9.583

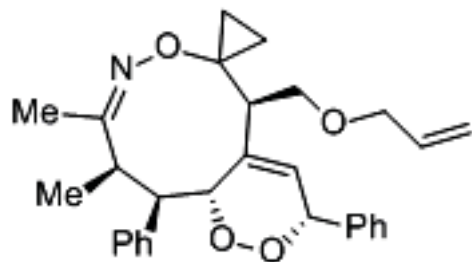

*cis-6ac*

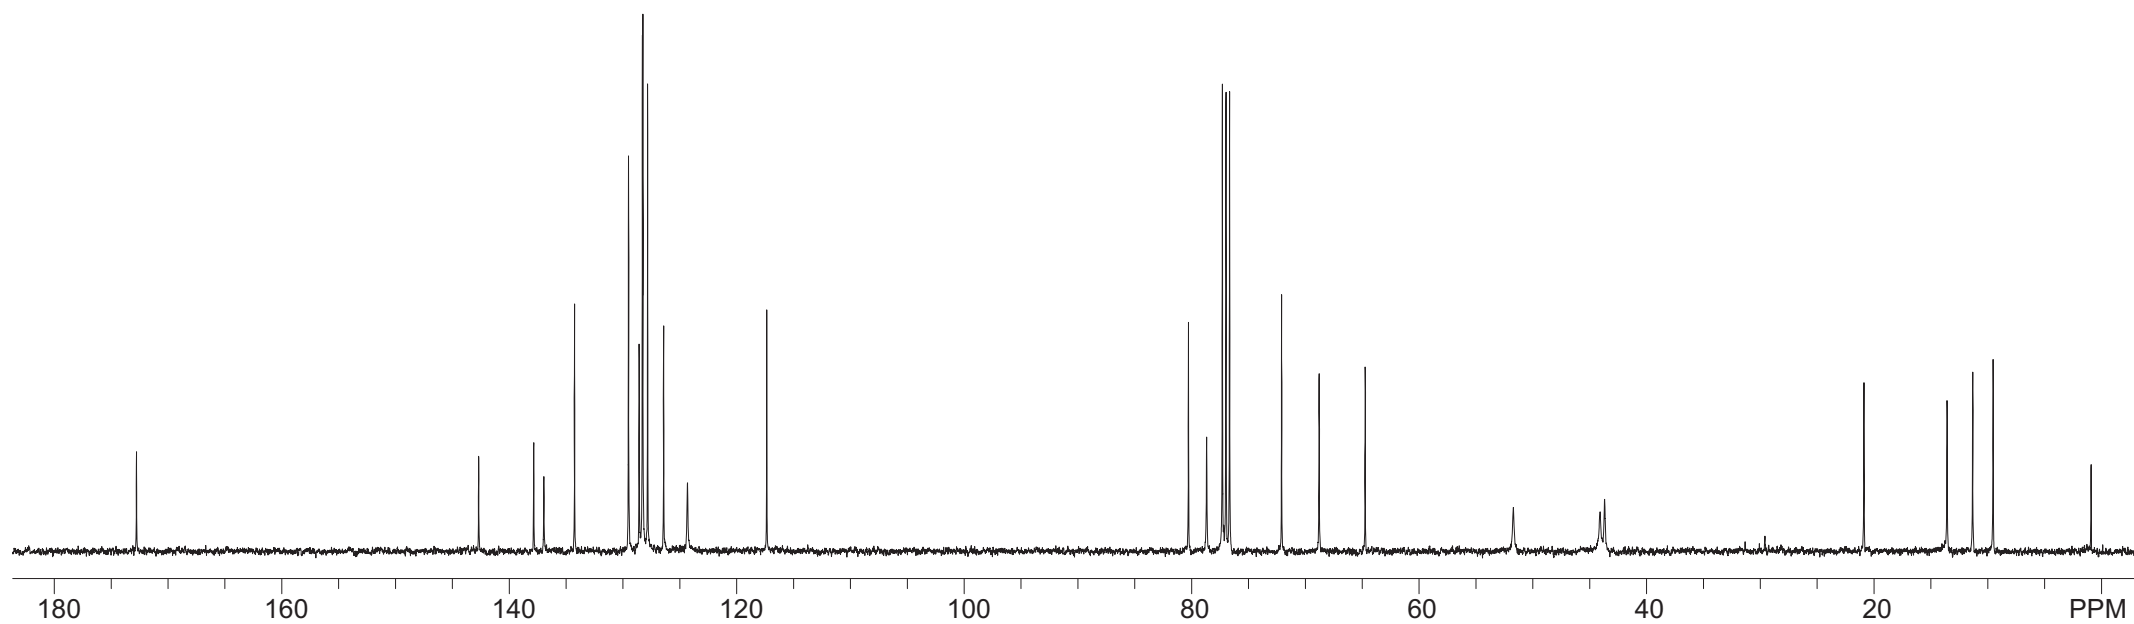

7.350  
7.332  
7.284  
7.265  
7.249  
7.201  
7.183  
7.166  
7.124  
7.115

5.828  
5.652  
5.645  
5.558

3.850  
4.097  
3.834  
3.827  
3.811  
3.677  
3.667  
3.653  
3.643  
3.483  
3.474  
3.071  
3.055  
2.968

2.366

1.887  
1.440  
1.422  
1.144  
1.125  
1.046  
1.035  
1.018  
0.846  
0.827  
0.816

0.000

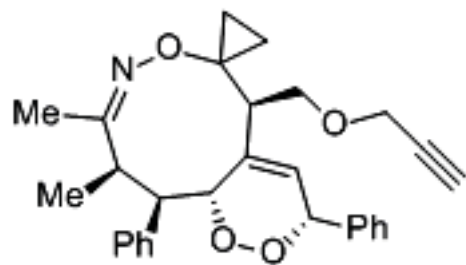

*cis-6ad*

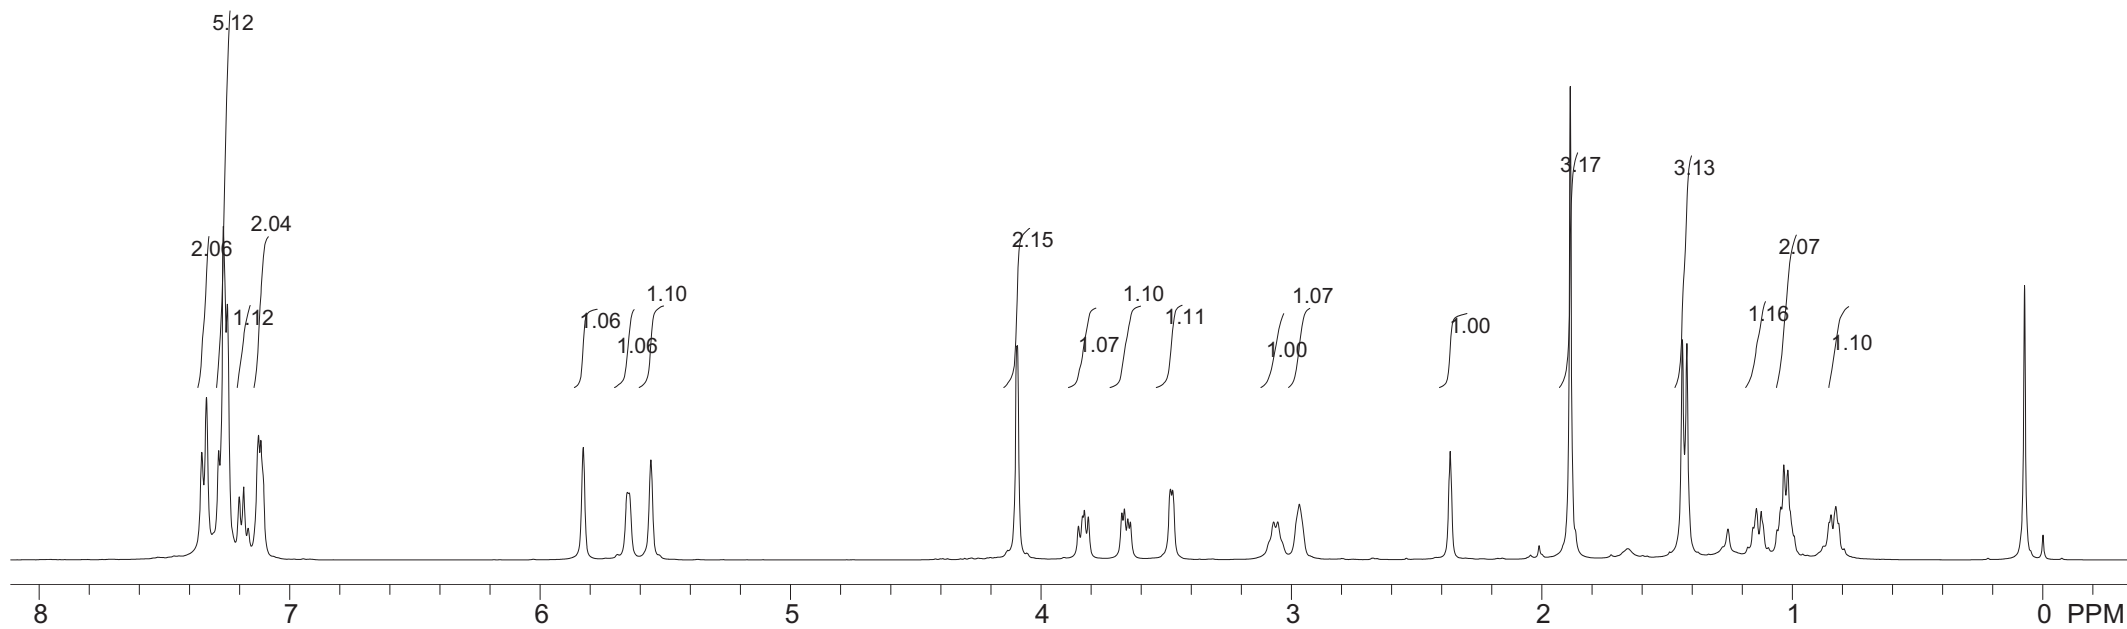

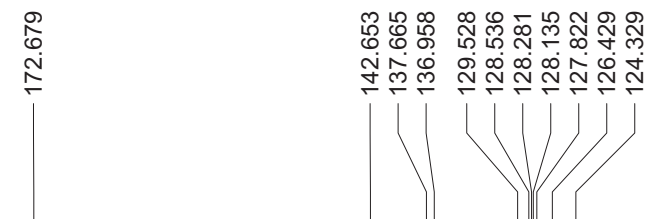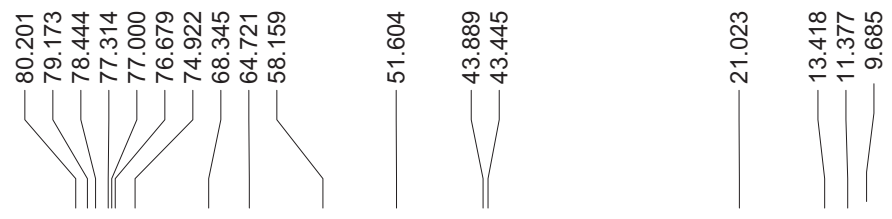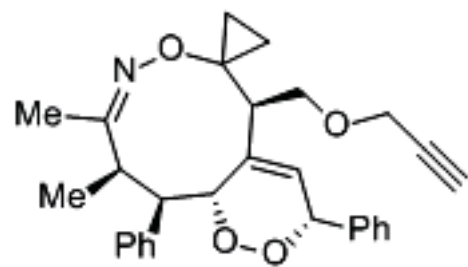

*cis-6ad*

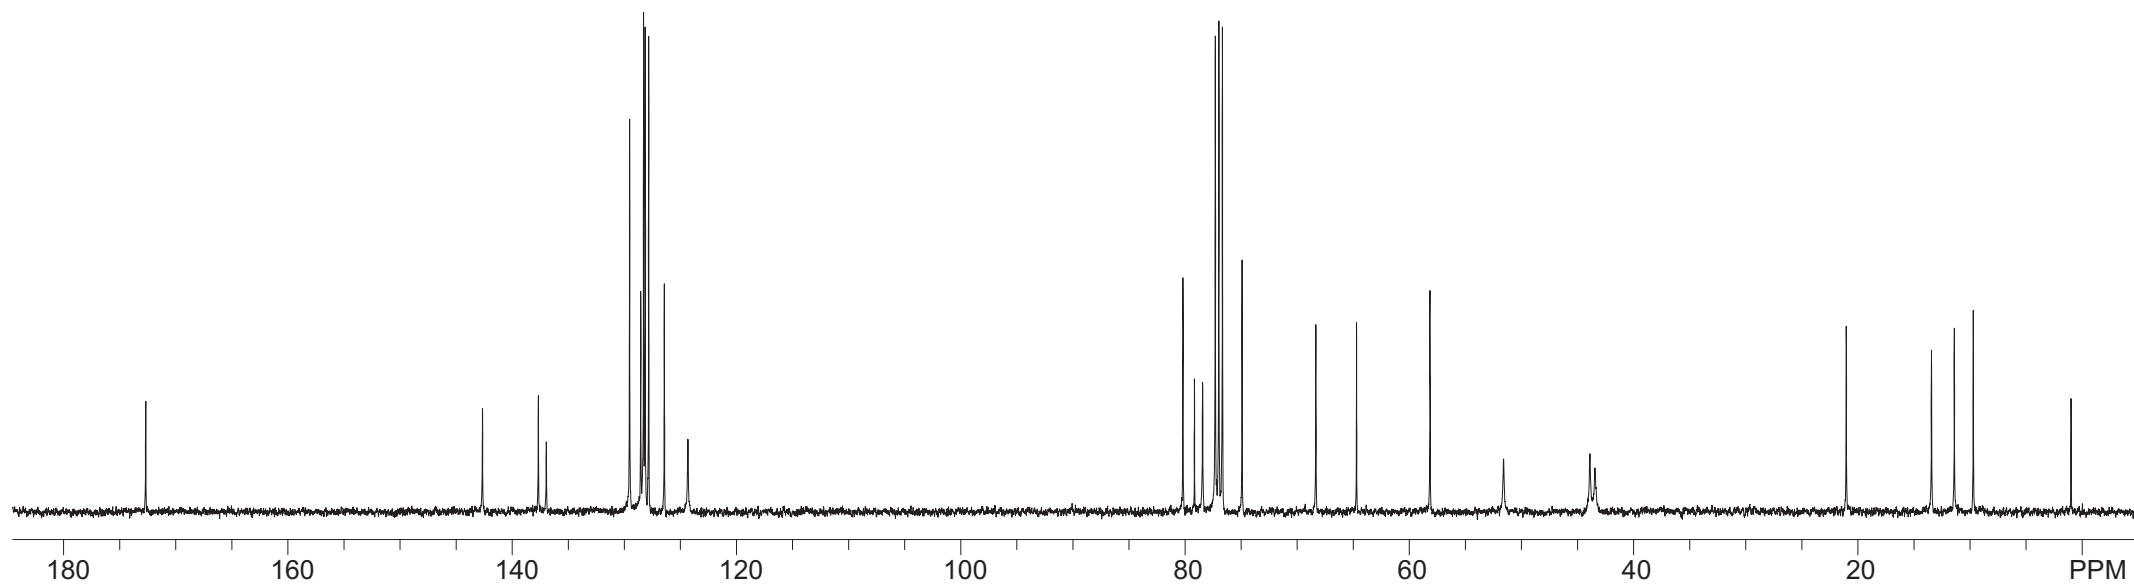

7.324  
7.306  
7.281  
7.266  
7.246  
7.194  
7.176  
7.159  
7.121  
7.112

5.693  
5.581  
5.574  
5.523

4.422  
4.403  
4.394  
4.375  
4.214  
4.203  
4.186

3.513  
3.504  
3.112  
3.095  
2.971

2.008  
1.863  
1.429  
1.411  
1.181  
1.167  
1.153  
1.141  
1.135  
1.123  
1.110  
1.096  
1.082  
0.860  
0.846  
0.834  
0.824  
0.790  
0.779  
0.766  
0.754  
0.738  
0.000

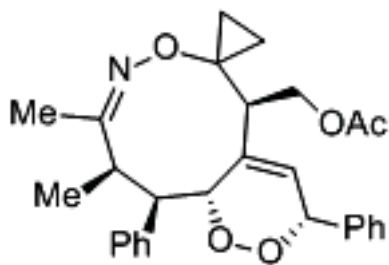

*cis-6ae*

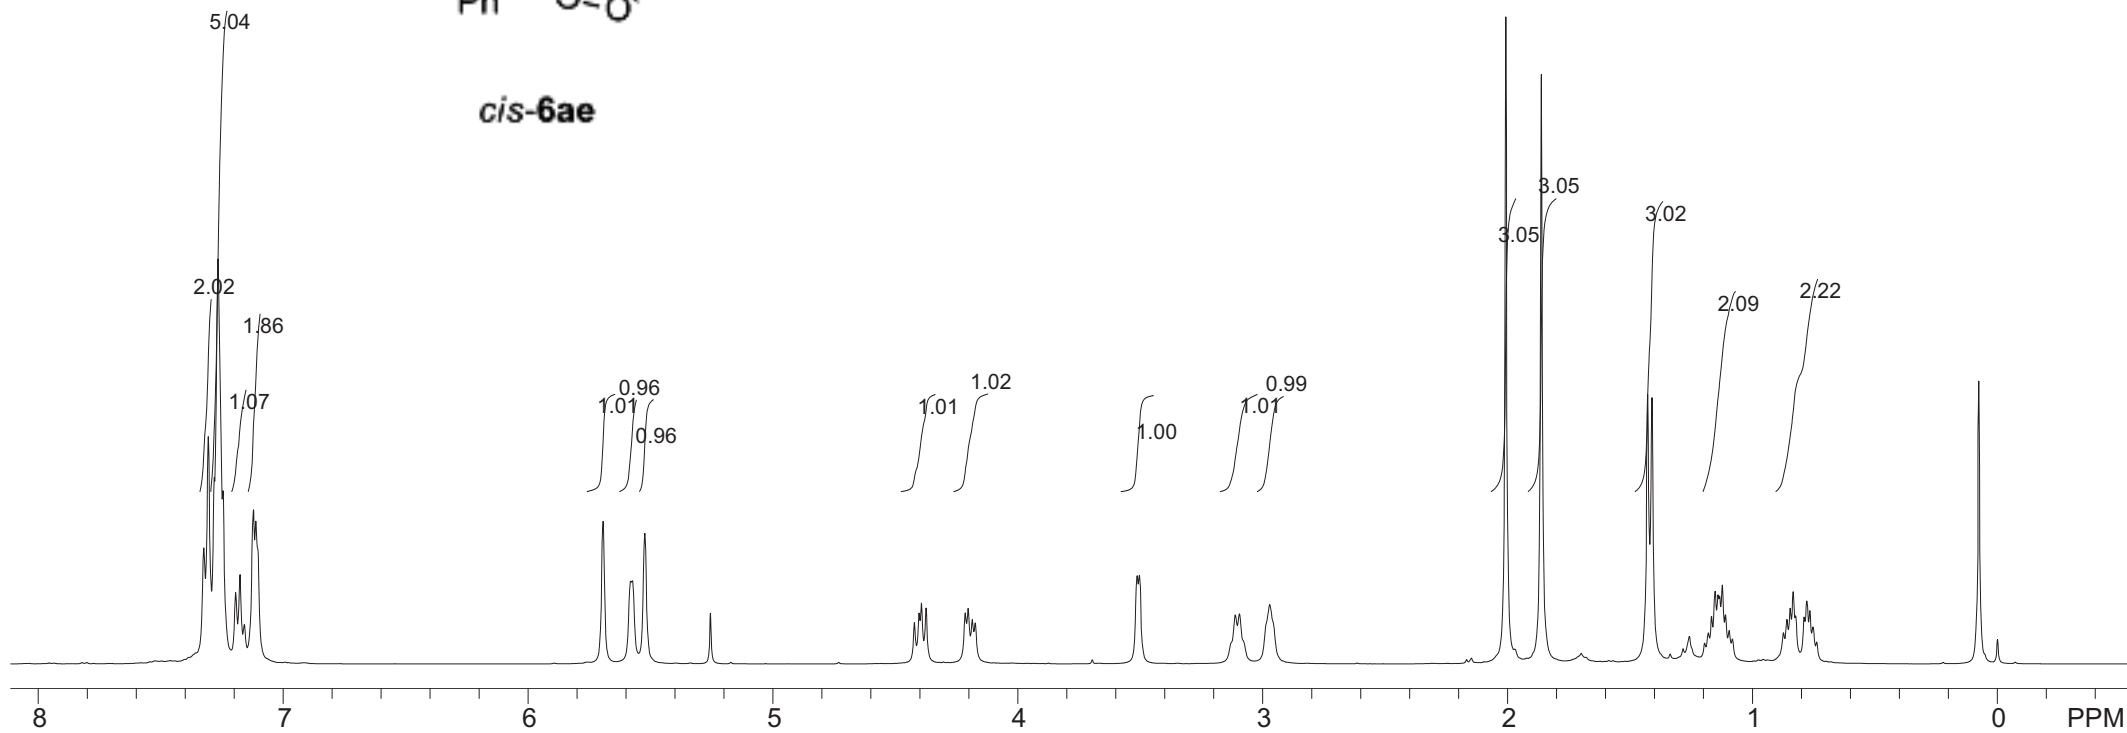



173.328  
170.689

142.507  
137.140  
136.477  
129.419  
128.733  
128.340  
128.186  
127.887  
126.480  
125.029

80.289  
78.641  
77.321  
77.000  
76.687  
64.262  
63.051

51.844  
44.079  
43.656

20.819  
20.739  
13.885  
11.034  
8.854

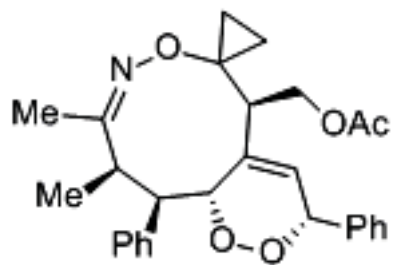

*cis-6ae*

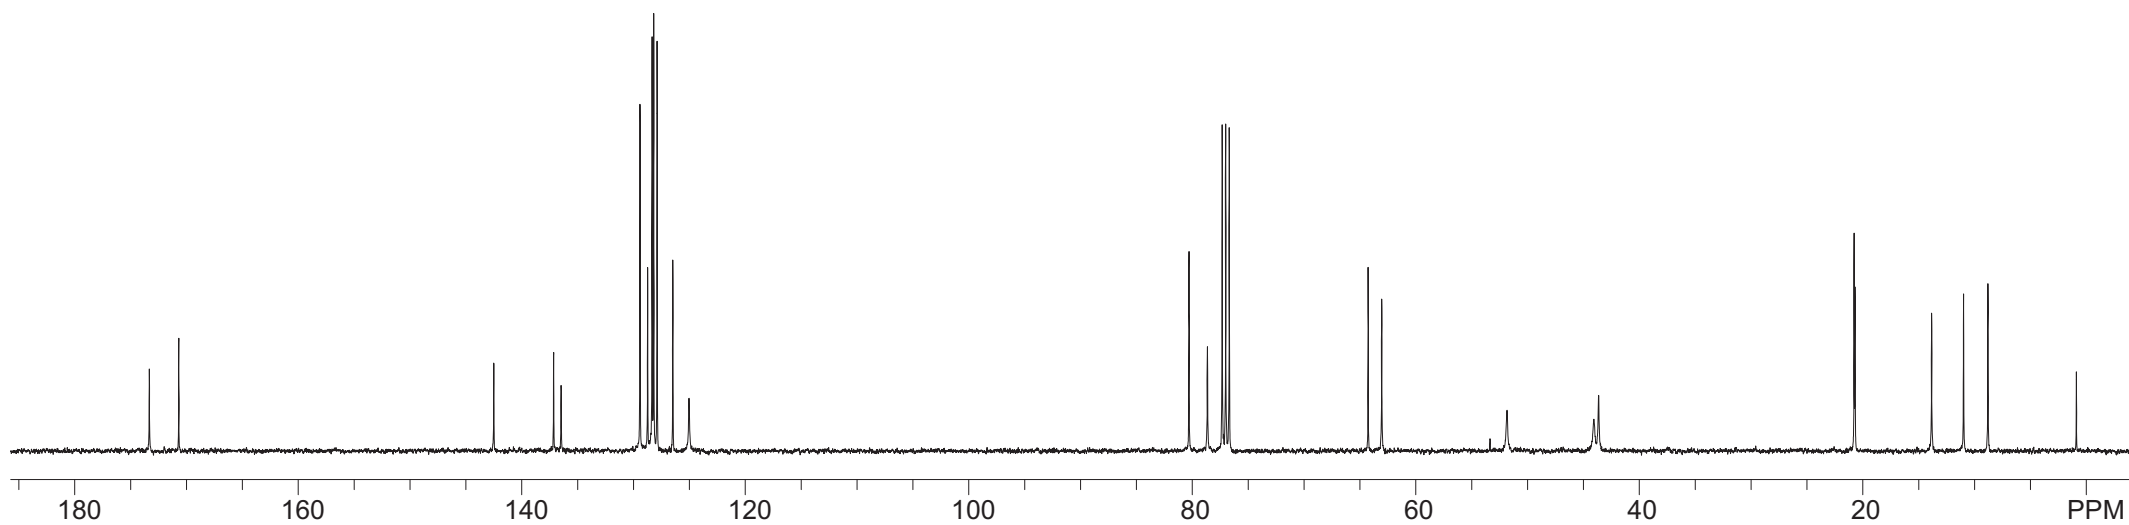

7.327  
7.308  
7.276  
7.273  
7.260  
7.240  
7.191  
7.174  
7.155  
7.135  
7.126

5.741  
5.539

4.514  
4.493  
4.486  
4.466  
4.185  
4.174  
4.156  
4.145

3.541  
3.534

3.169  
3.153

2.937

1.840

1.437  
1.411  
1.393  
1.145  
1.127  
0.858  
0.832  
0.776  
0.750  
0.737

0.000

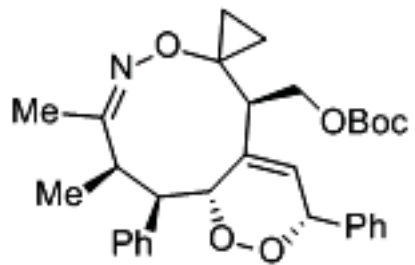

*cis-6af*

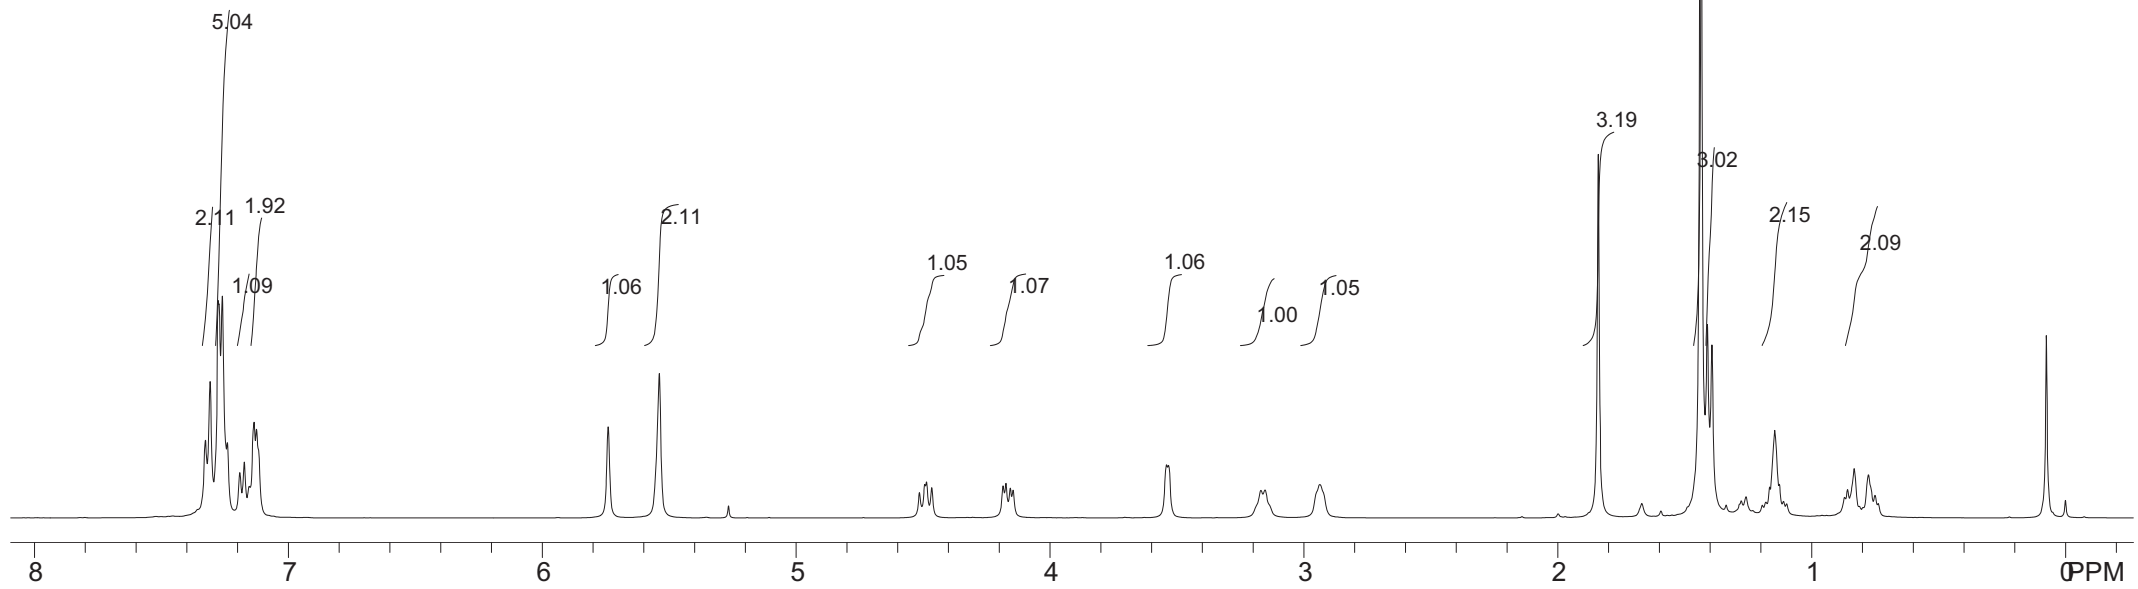

173.532  
 153.255  
 142.529  
 136.914  
 136.506  
 129.506  
 128.704  
 128.347  
 128.259  
 127.880  
 126.473  
 125.496  
 82.286  
 80.332  
 78.779  
 77.314  
 77.000  
 76.679  
 65.516  
 64.408  
 52.107  
 45.092  
 43.270  
 27.658  
 20.571  
 14.177  
 11.151  
 8.810

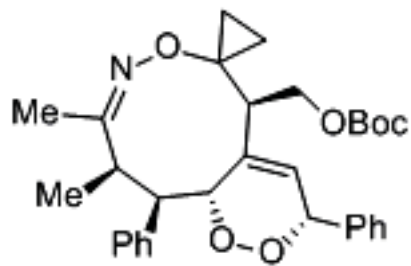

*cis-6af*

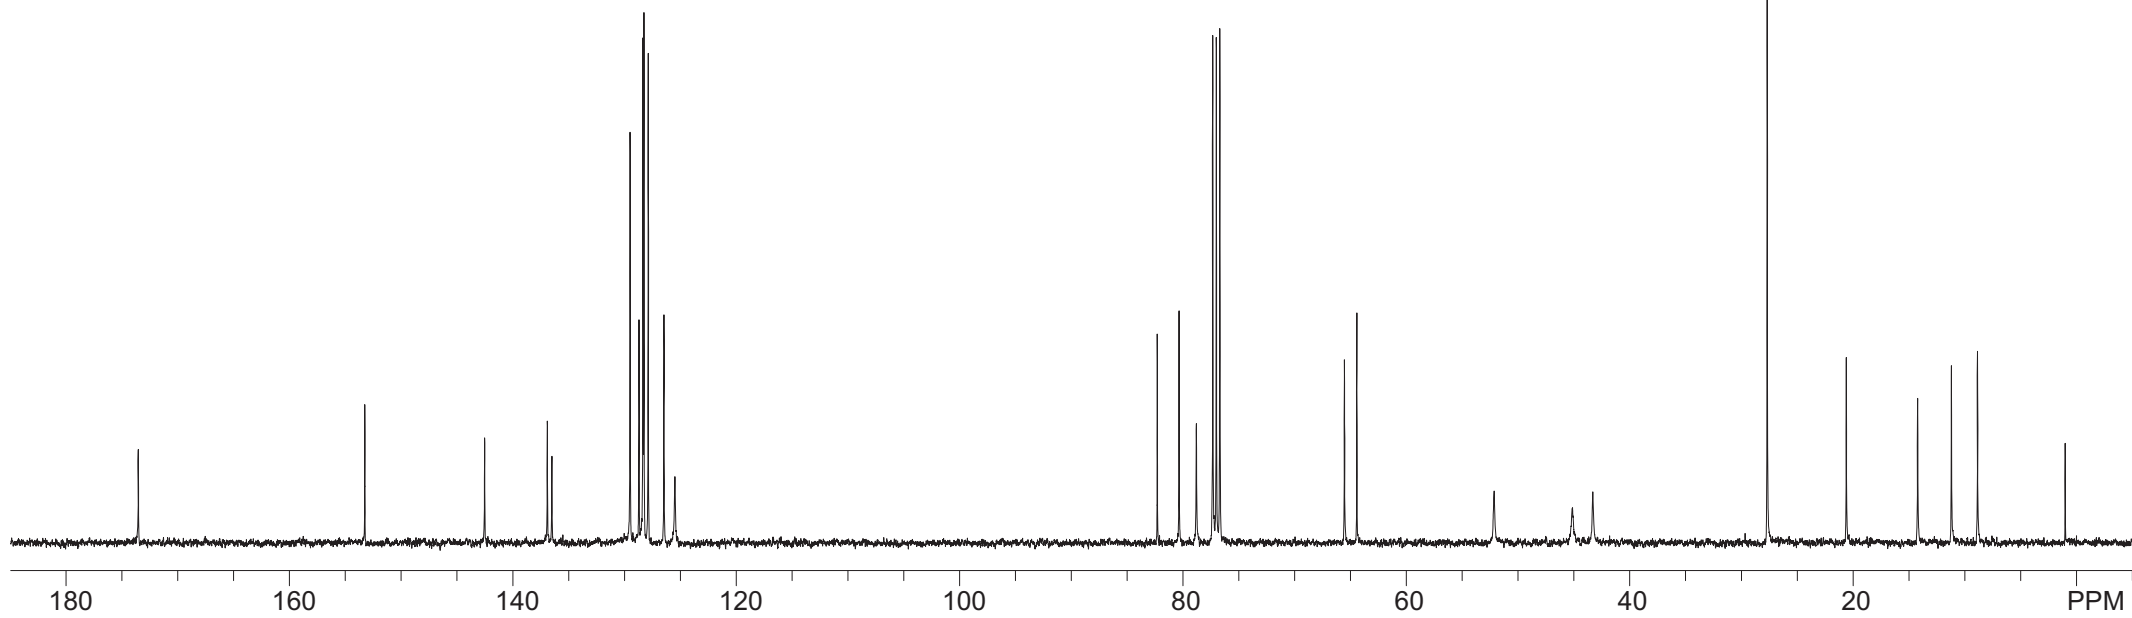

7.353  
7.334  
7.292  
7.274  
7.258  
7.228  
7.213  
7.204  
7.185  
7.185  
7.010  
6.996  
6.470  
6.445  
6.431  
6.406  
6.032  
5.993  
5.807  
5.530  
5.467

4.192  
4.175  
4.157  
4.140  
3.798  
3.774  
3.378  
3.370

2.776  
2.759  
2.741  
2.724

1.529  
1.964  
1.511  
1.285  
1.268  
1.252  
1.132  
1.117  
1.107  
1.093  
1.084  
1.070  
1.056  
0.896  
0.879  
0.856  
0.792  
0.777  
0.764  
0.751  
0.738  
-0.000

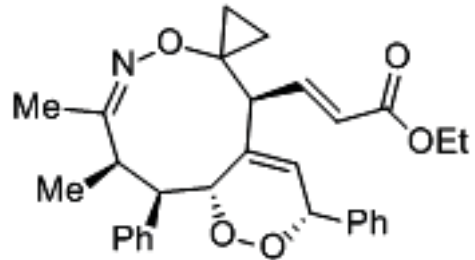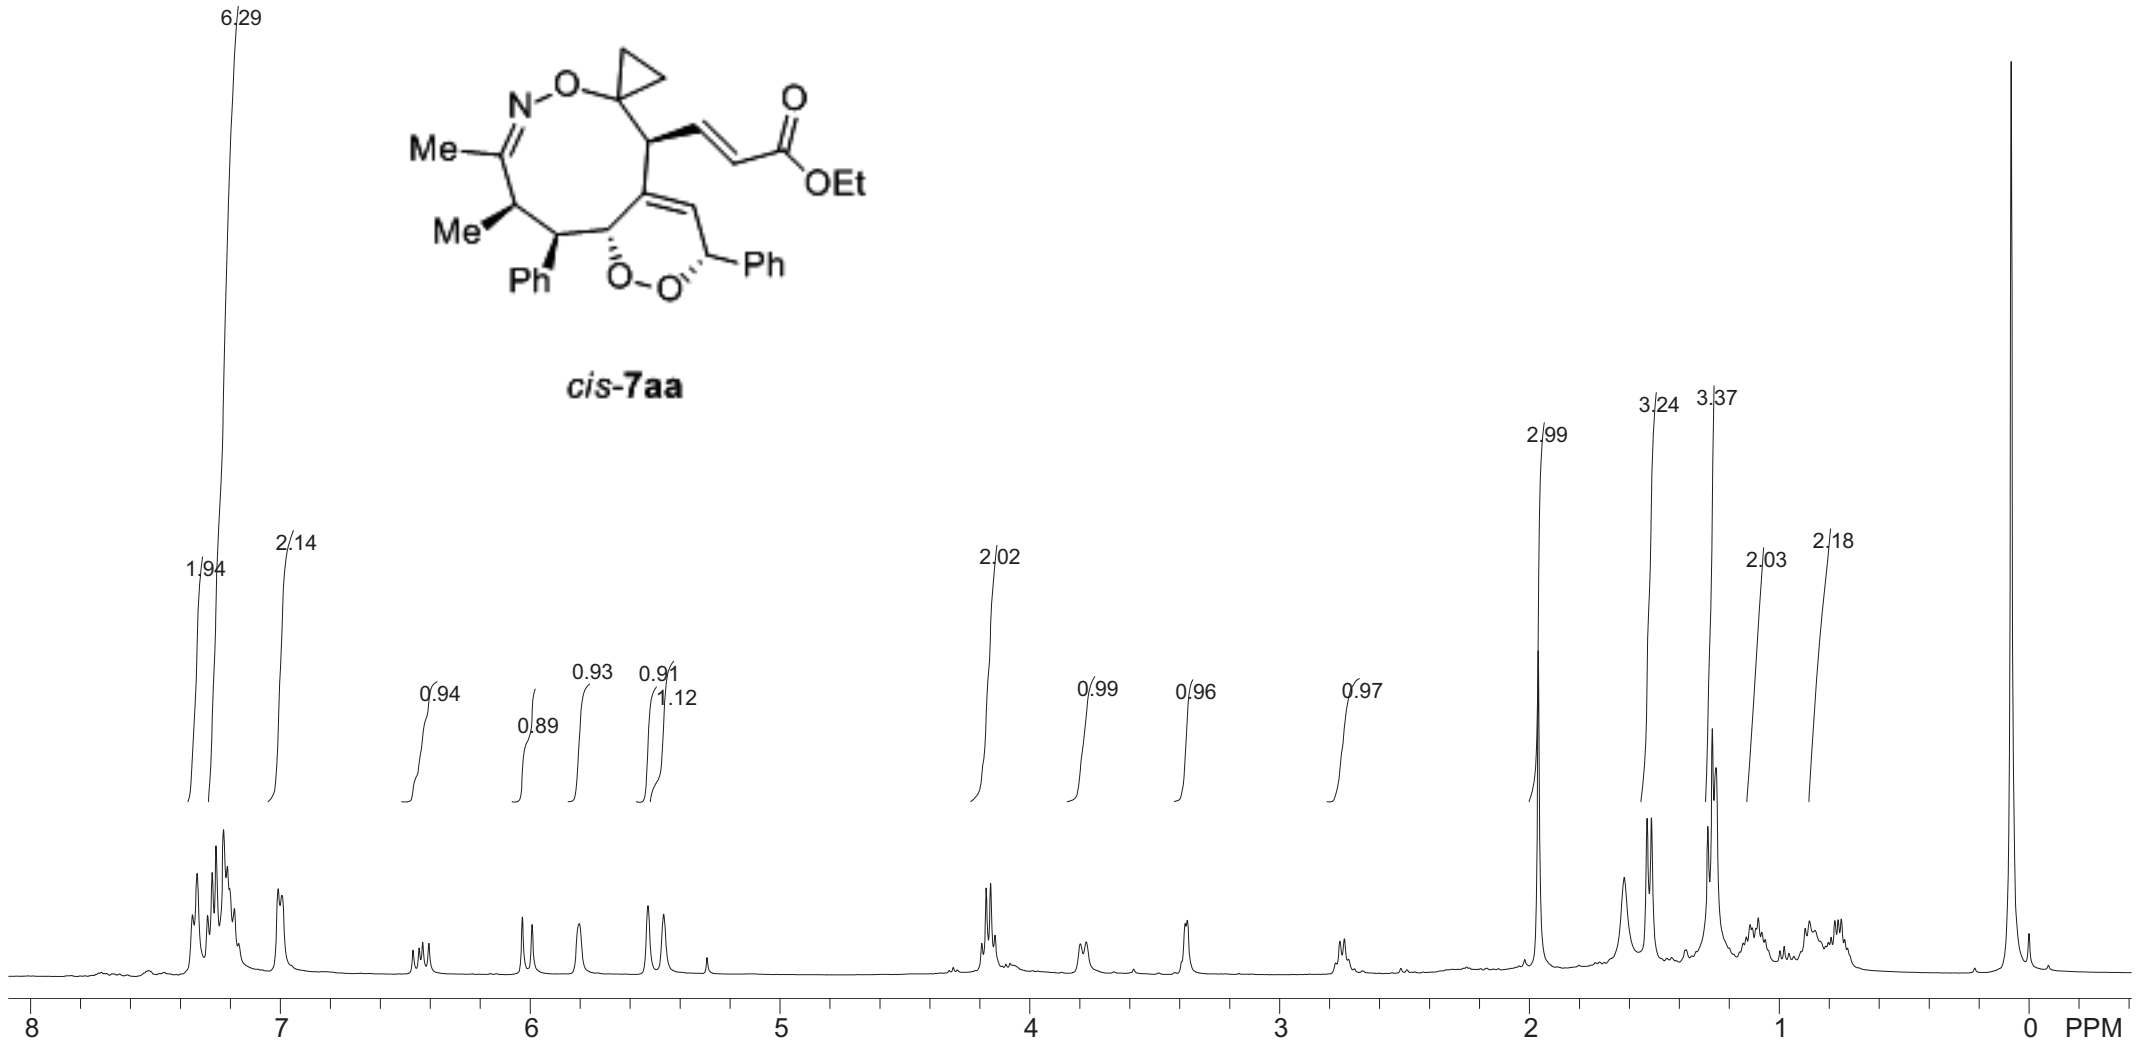

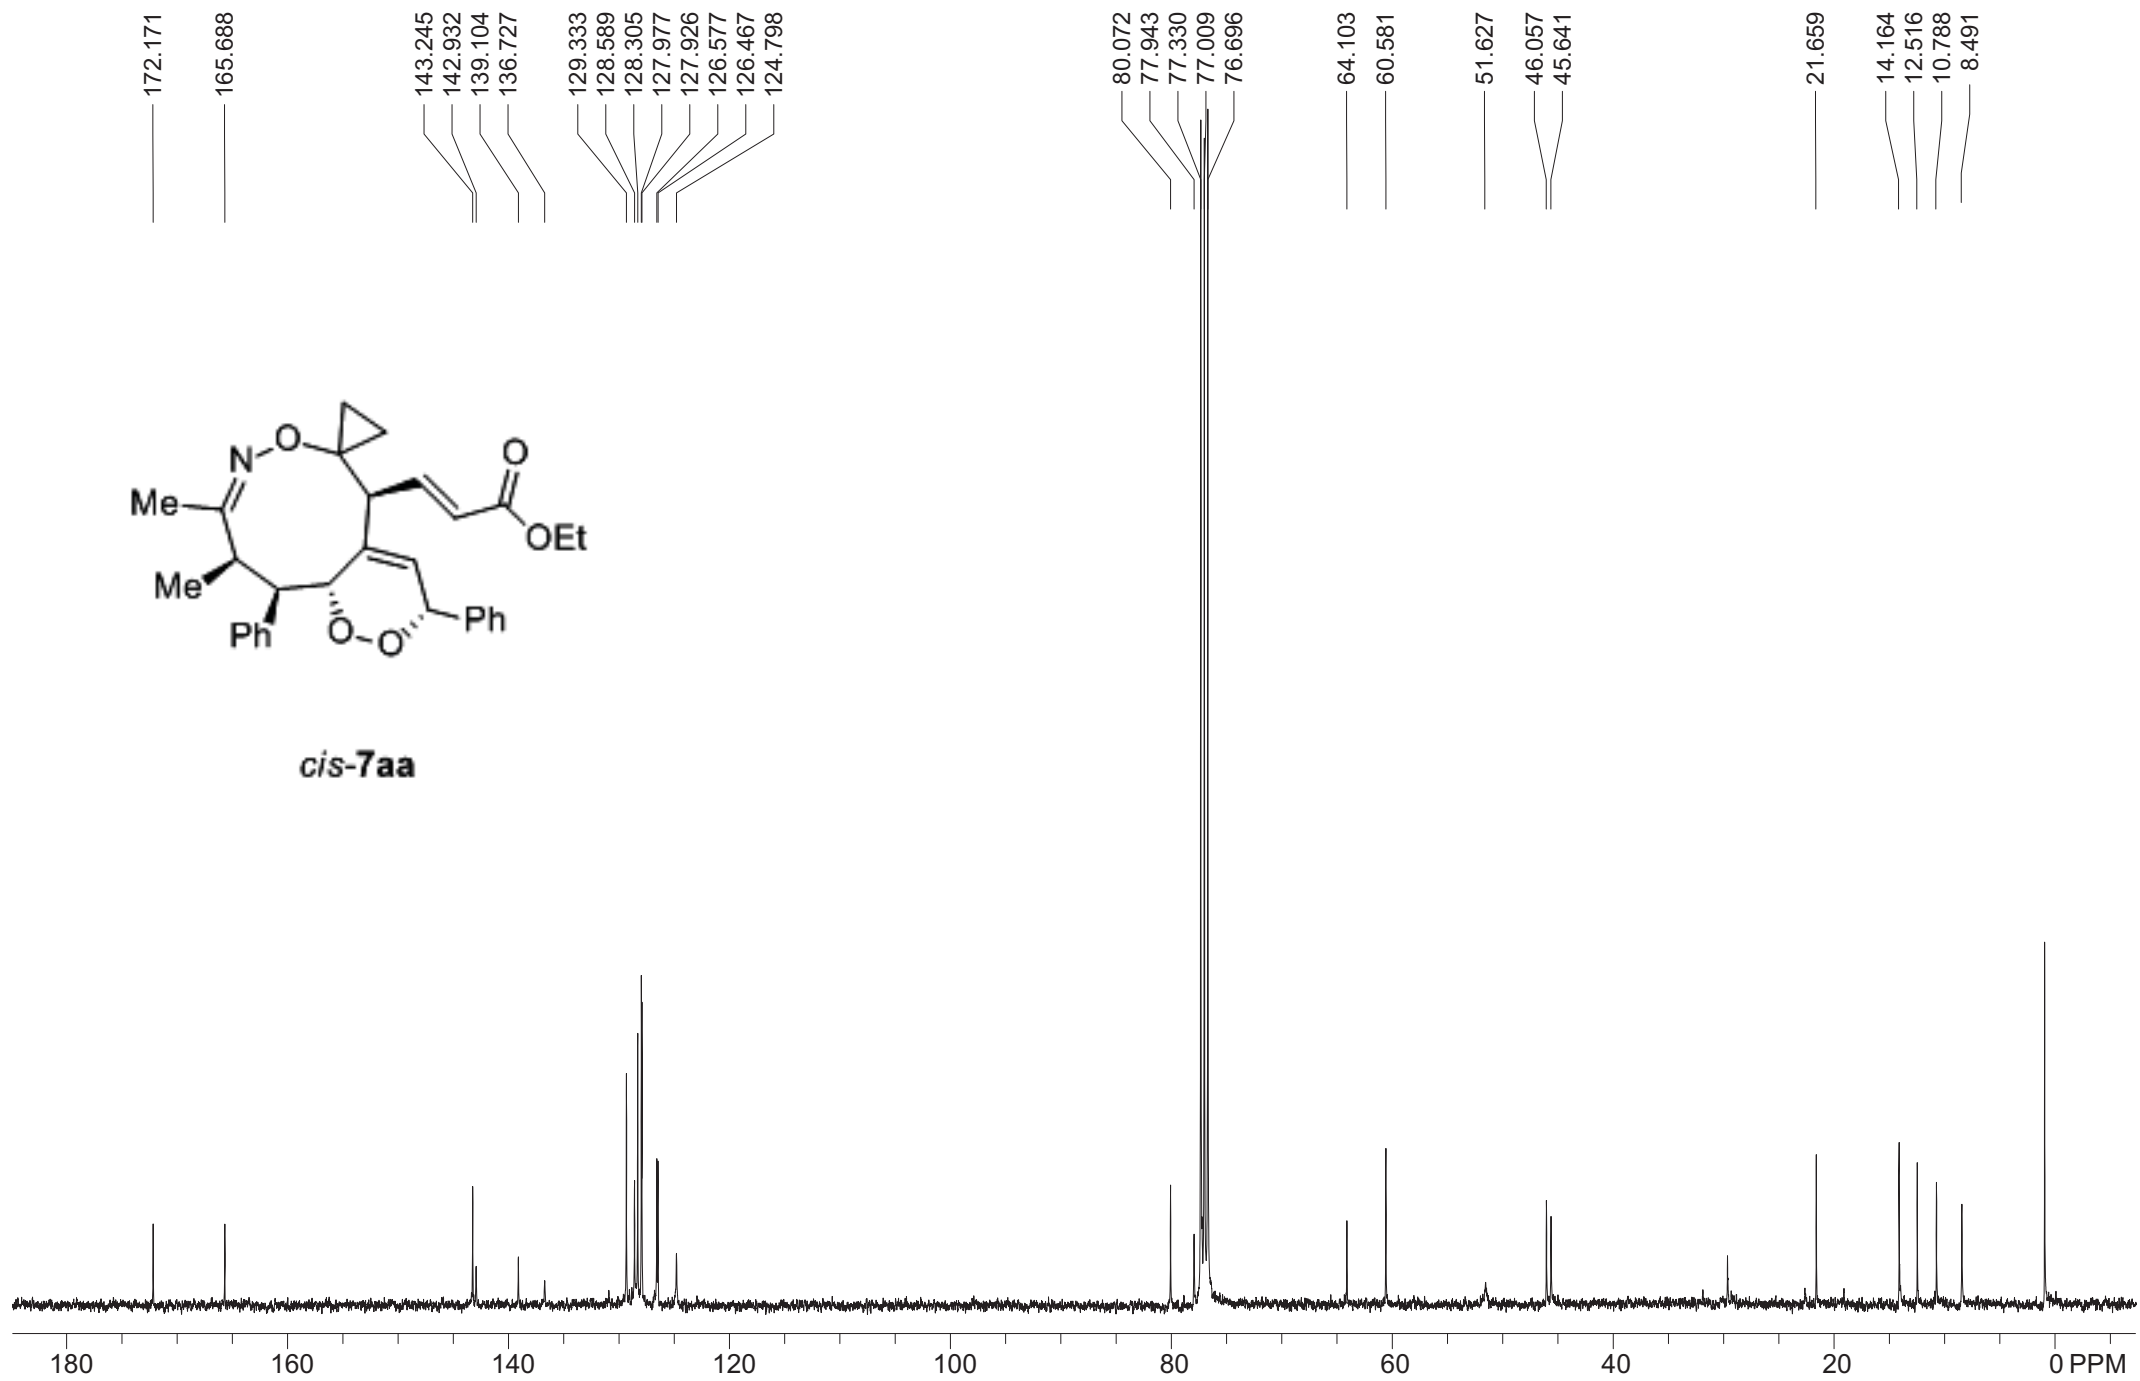

7.333  
7.281  
7.262  
7.246  
7.223  
7.207  
7.196  
7.178  
7.160  
7.001  
6.987  
6.532  
6.507  
6.493  
6.468  
6.095  
6.056  
5.796  
5.527  
5.462  
5.151

3.801  
3.777  
3.371  
3.363

2.775  
2.758  
2.740  
2.723

1.950  
1.521  
1.503  
1.143  
1.131  
1.116  
1.107  
1.093  
1.084  
1.070  
1.056  
0.794  
0.785  
0.769  
0.757  
0.744  
0.731  
0.719  
0.072  
-0.001

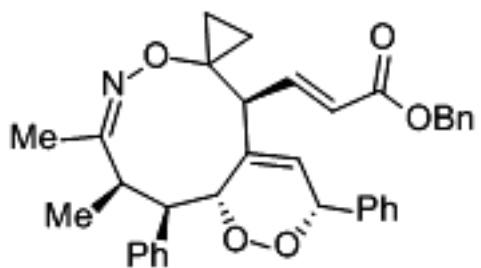

***cis-7ab***

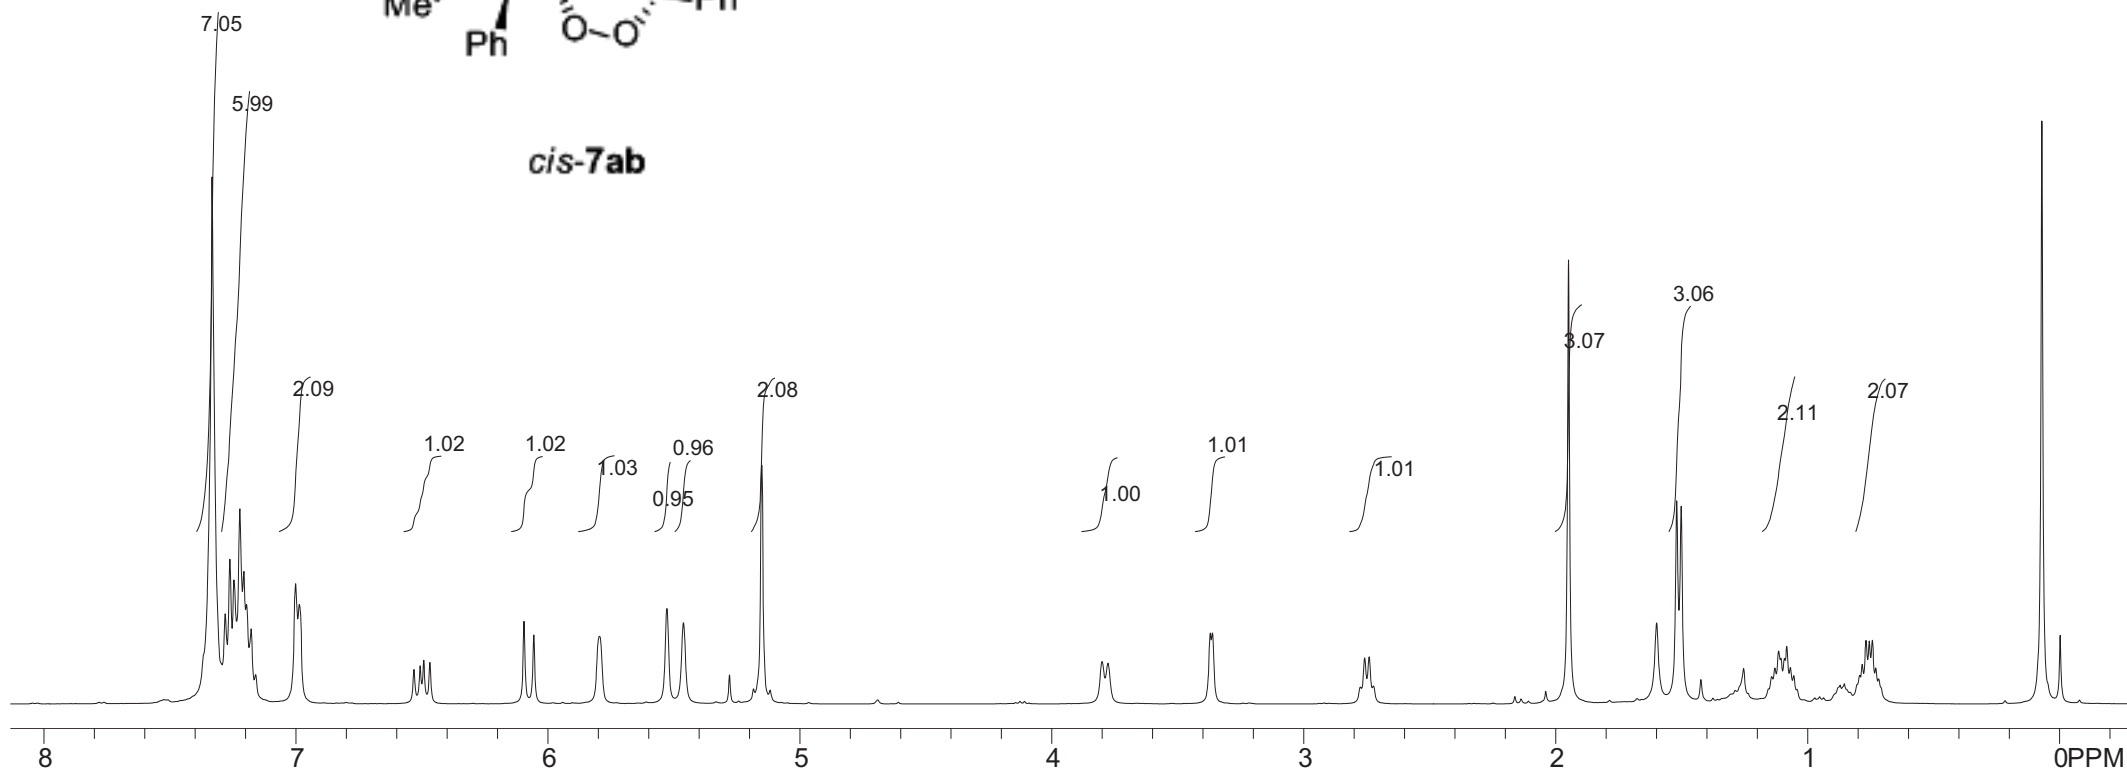

172.161  
165.439  
143.965  
142.864  
139.014  
136.674  
135.689  
129.309  
128.536  
128.296  
128.230  
128.092  
127.909  
126.451  
126.196  
124.869

80.026  
77.919  
77.314  
77.000  
76.679  
66.376  
64.072

51.538  
45.967  
45.756

21.607  
12.521  
10.808  
8.482

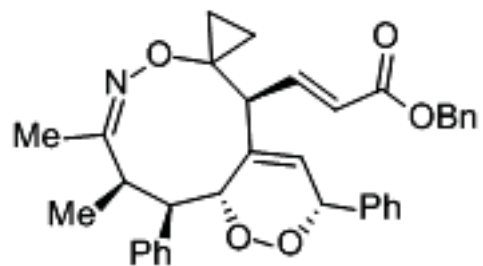

*cis-7ab*

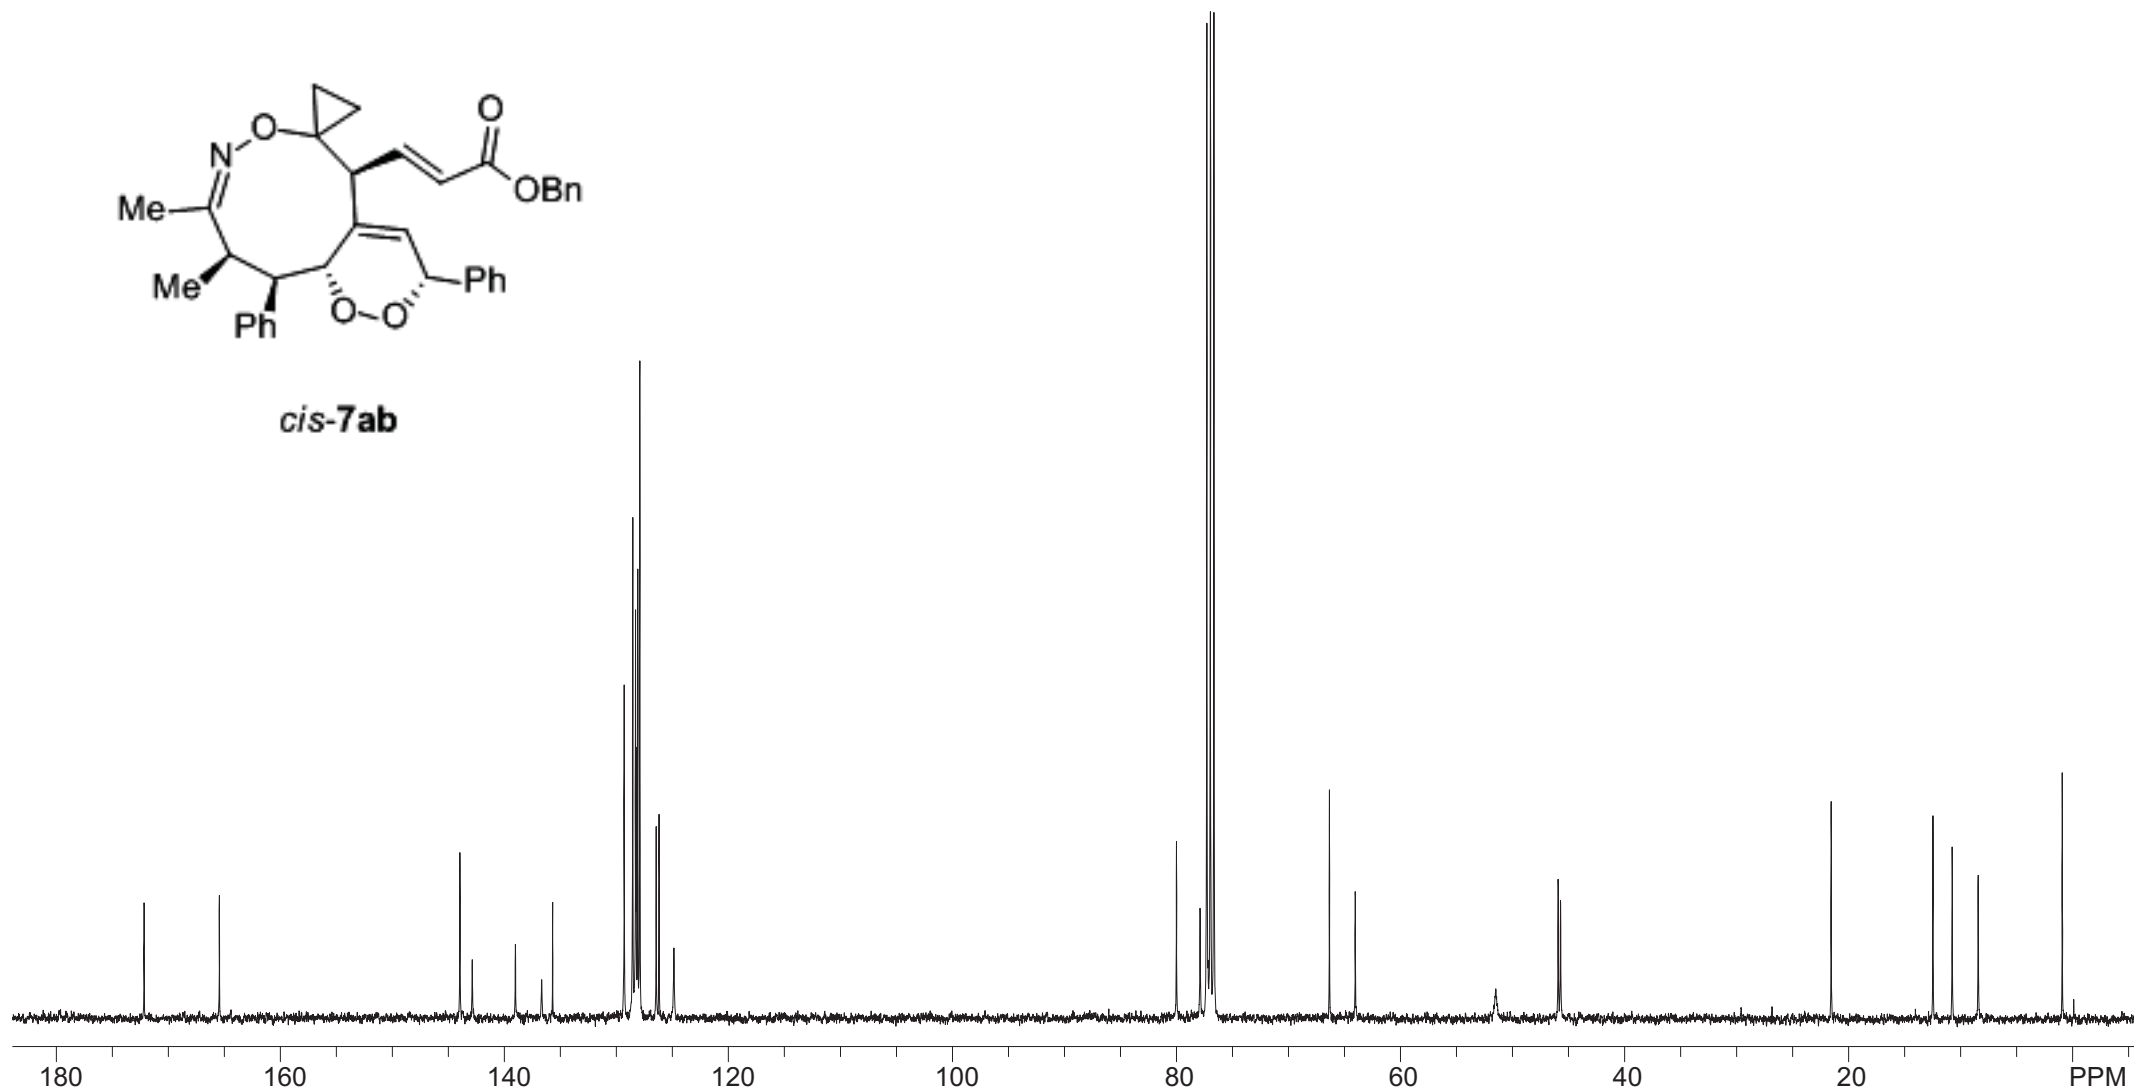

7.947  
7.928  
7.590  
7.572  
7.554  
7.484  
7.465  
7.446  
7.375  
7.356  
7.302  
7.284  
7.260  
7.195  
7.150  
7.113  
6.992  
6.982  
6.616  
6.591  
6.578  
6.553  
5.851  
5.582  
5.484

3.941  
3.917

3.416  
3.407

2.793  
2.776  
2.758  
2.741  
2.000

1.554  
1.536

1.155  
1.140  
1.129  
1.117  
1.103  
0.881  
0.868  
0.858  
0.843  
0.831  
0.807  
0.796  
0.782  
-0.000

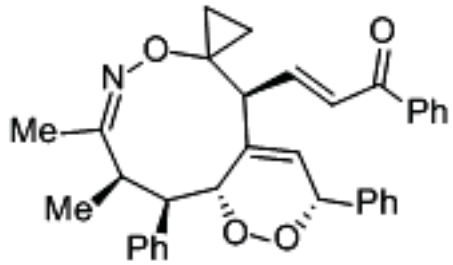

*cis-7ac*

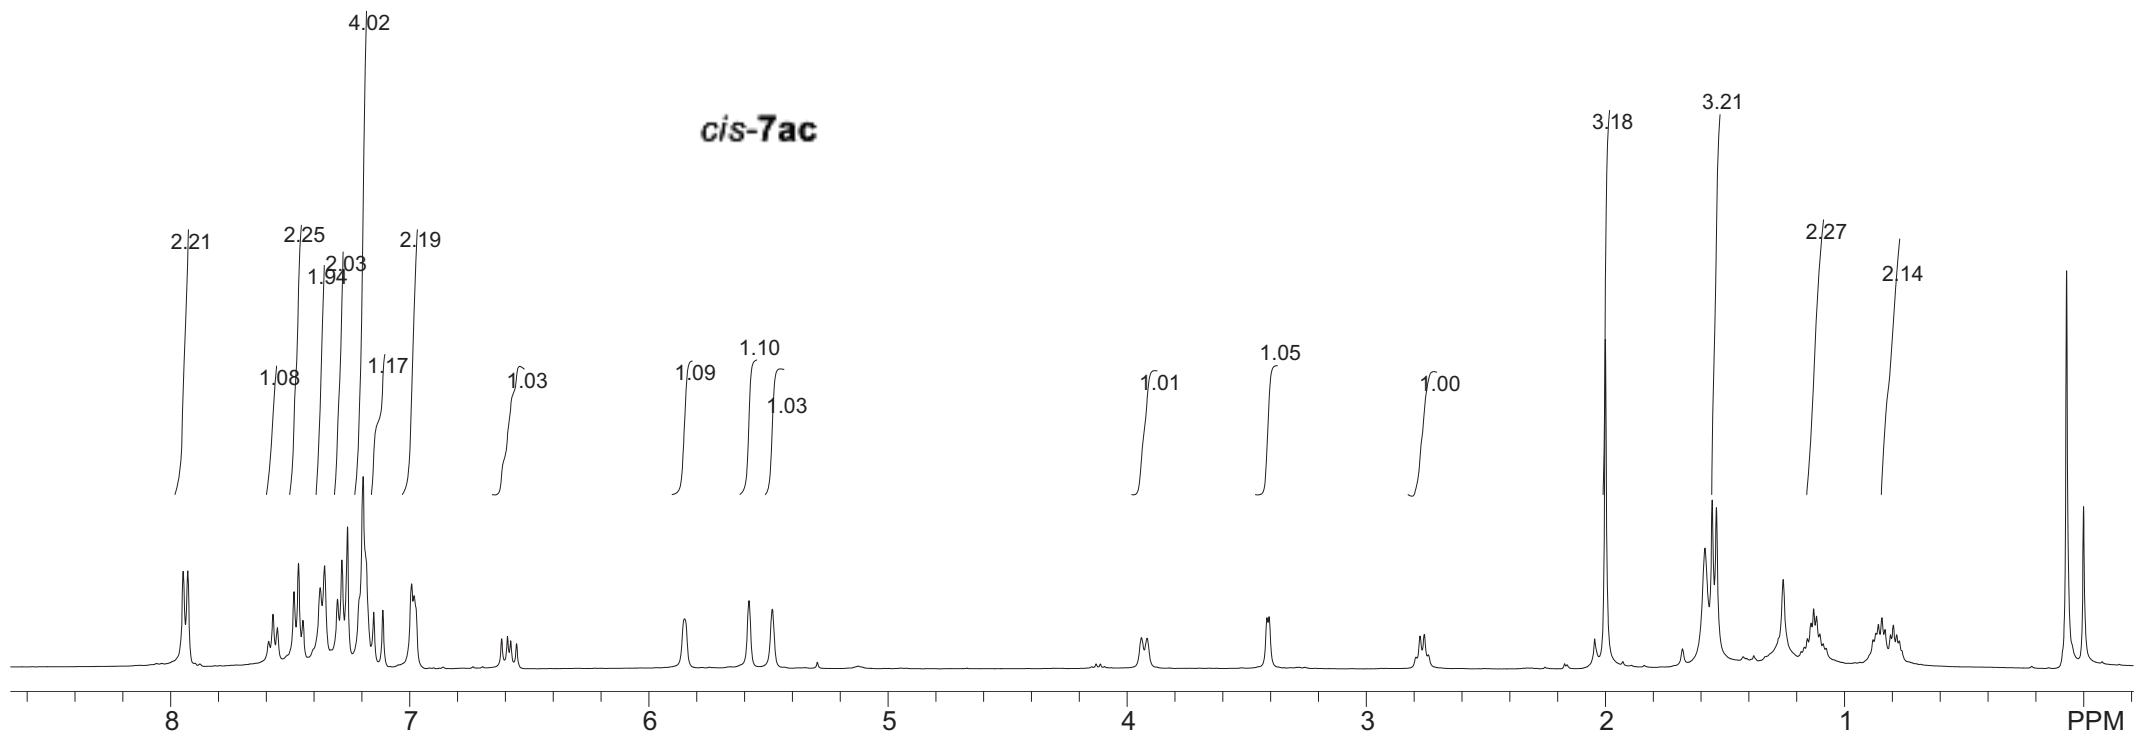



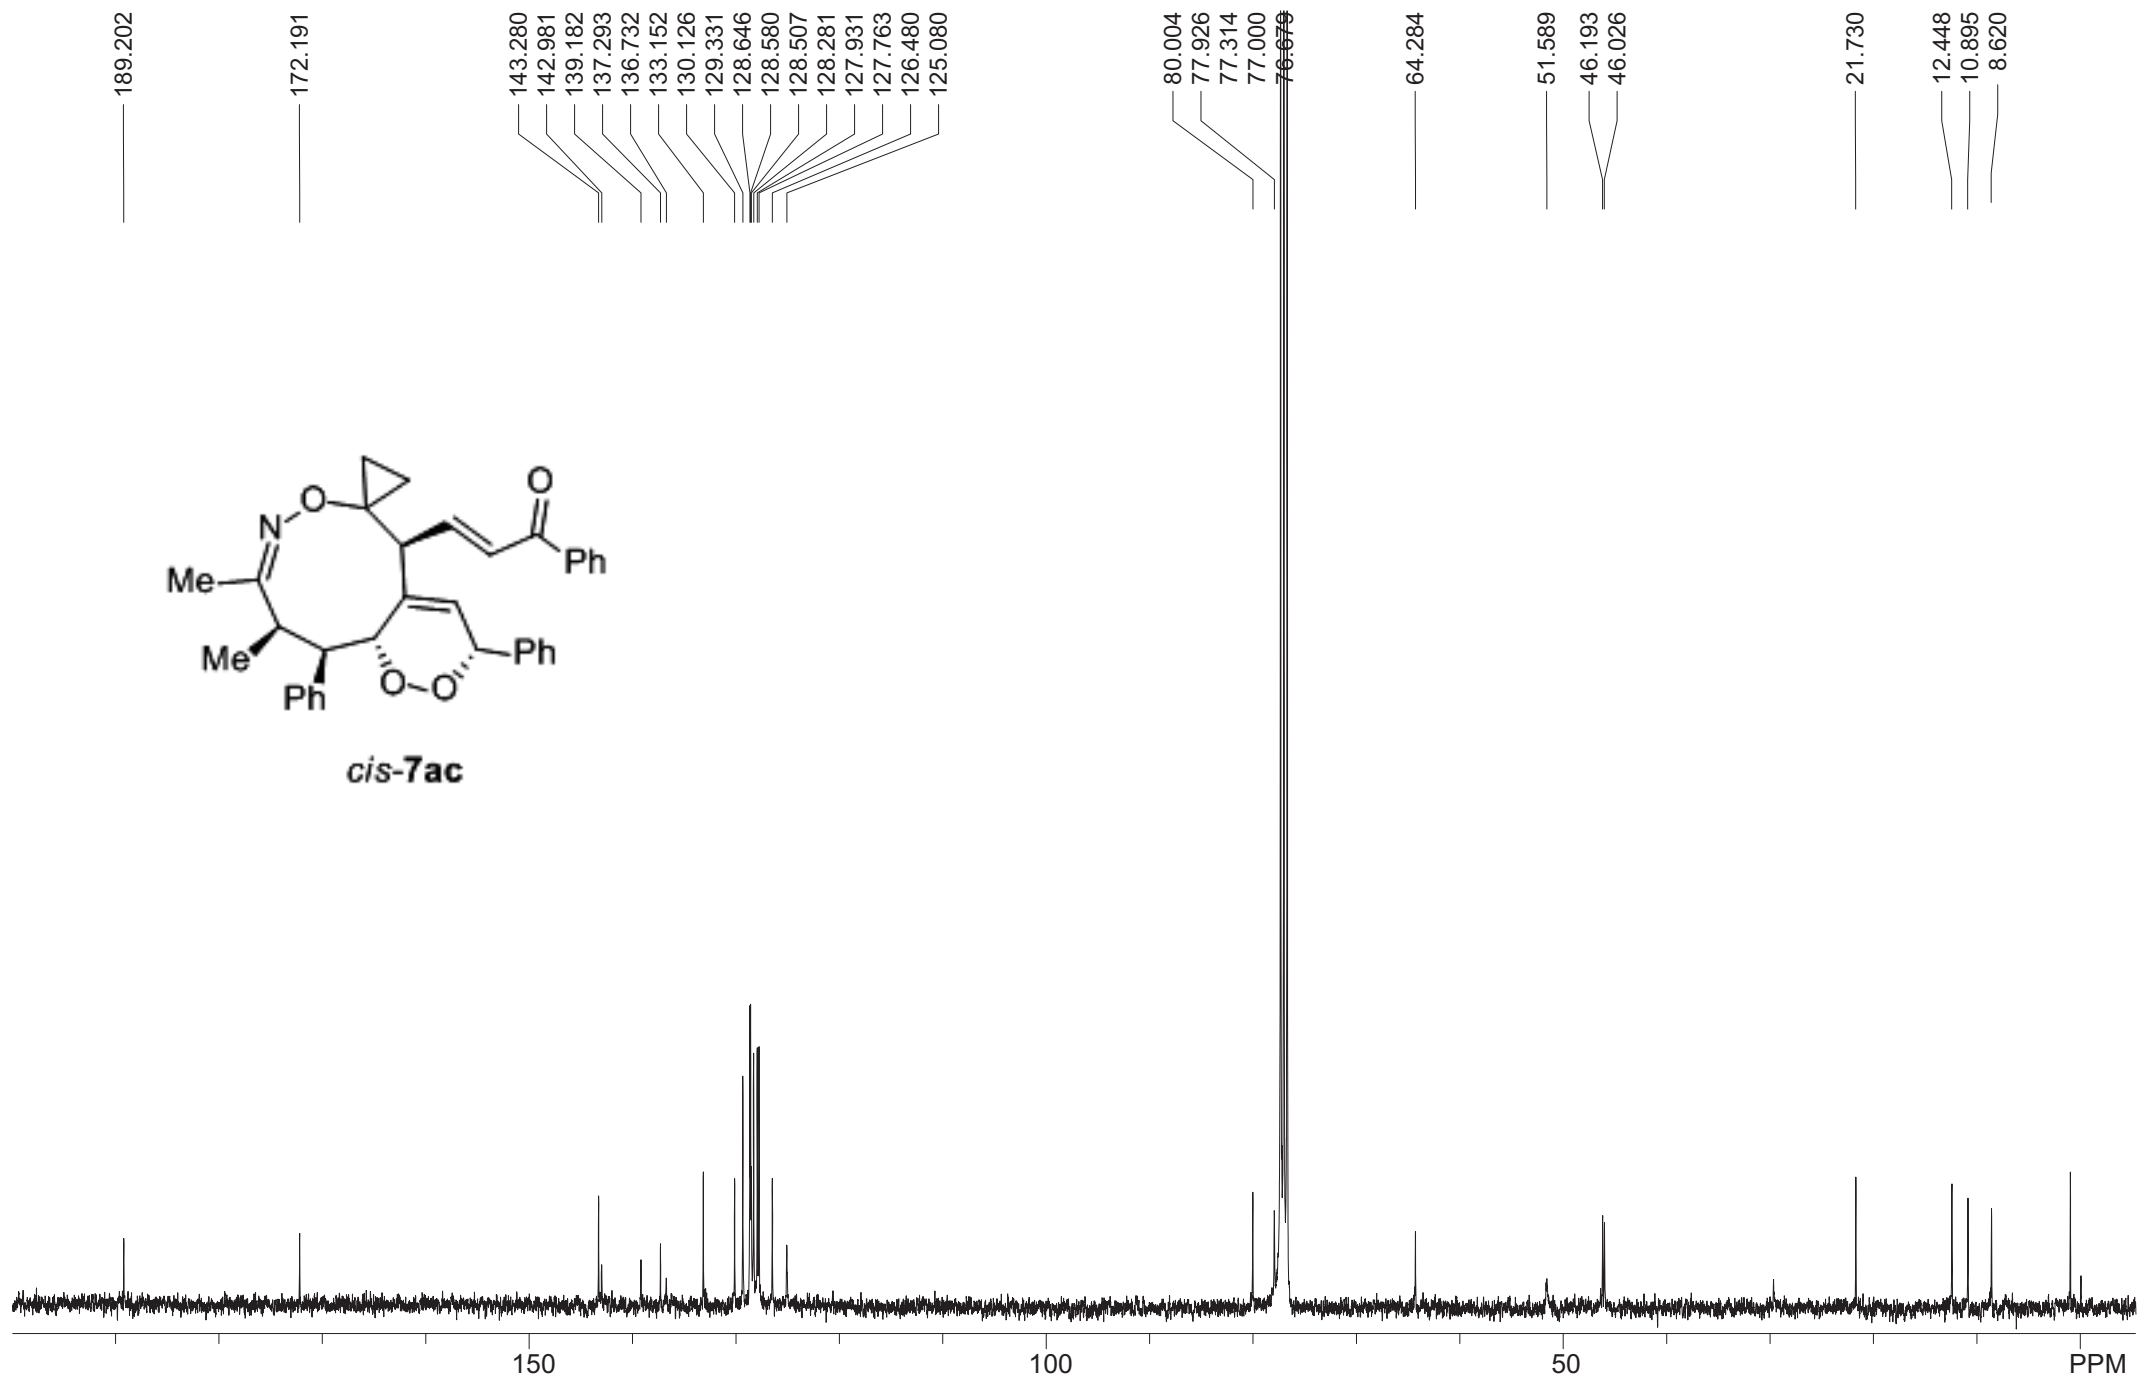

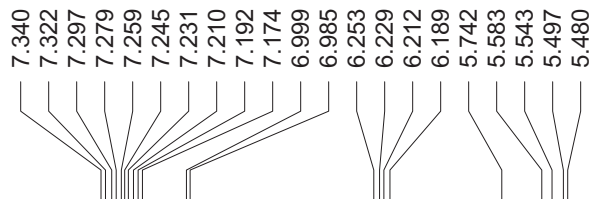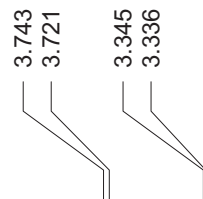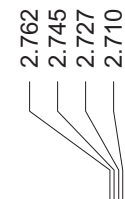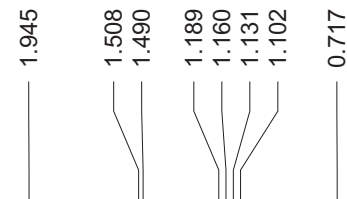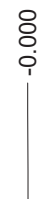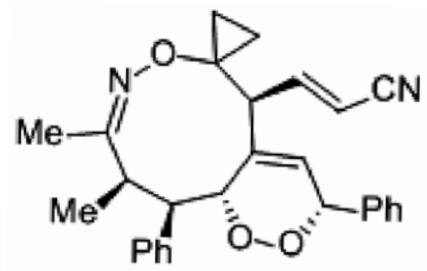

*cis-7ad*

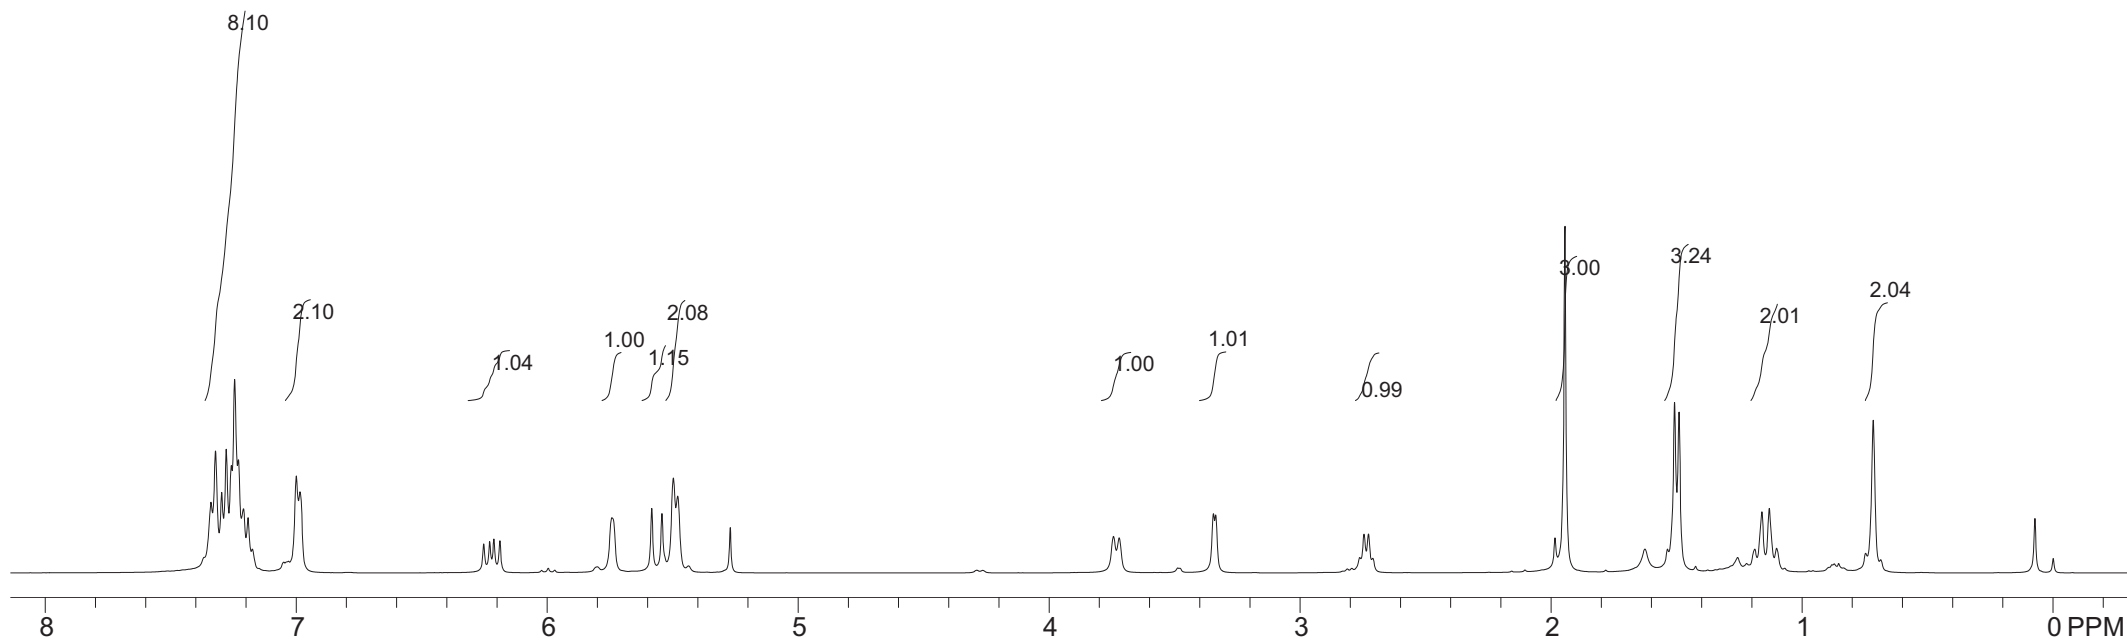

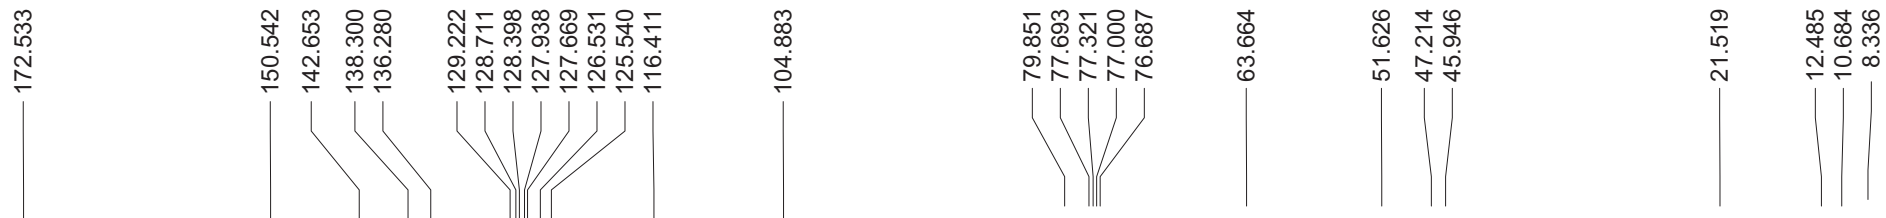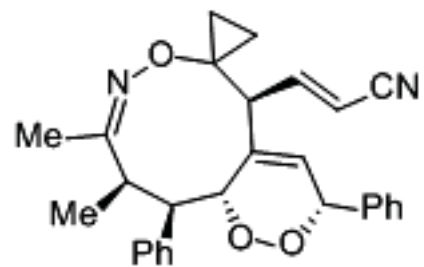

*cis-7ad*

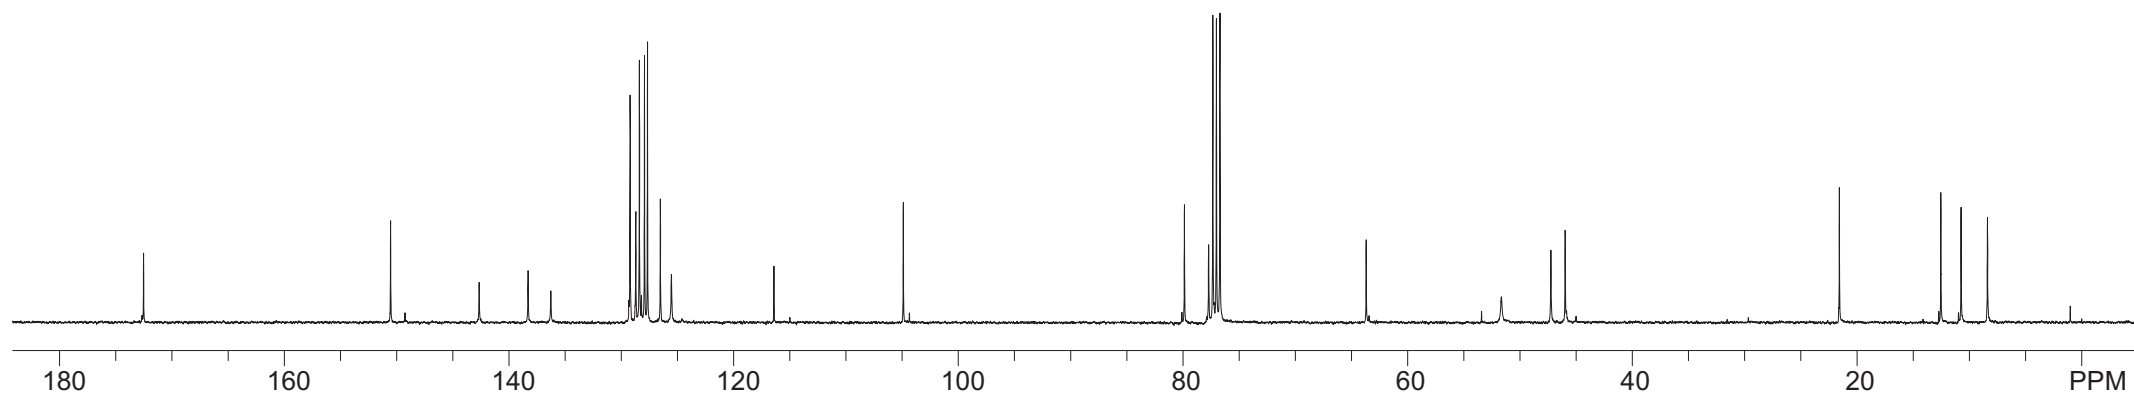

7.413  
7.397  
7.378  
7.356  
7.317  
7.300  
7.274  
7.258  
7.236  
7.224  
7.207  
7.188  
7.169  
7.152  
7.113  
7.096  
6.963  
6.948  
6.406  
6.382  
6.368  
6.344  
5.907  
5.869  
5.781  
5.493  
5.433

3.616  
3.592  
3.300  
3.272  
3.264  
2.646  
2.629

1.902  
1.505  
1.488  
1.065  
1.049  
1.037  
1.019  
1.004  
0.833  
0.823  
0.808  
0.793  
0.732  
0.719  
0.708  
-0.000

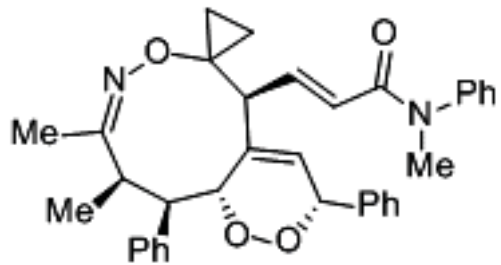

*cis-7ae*

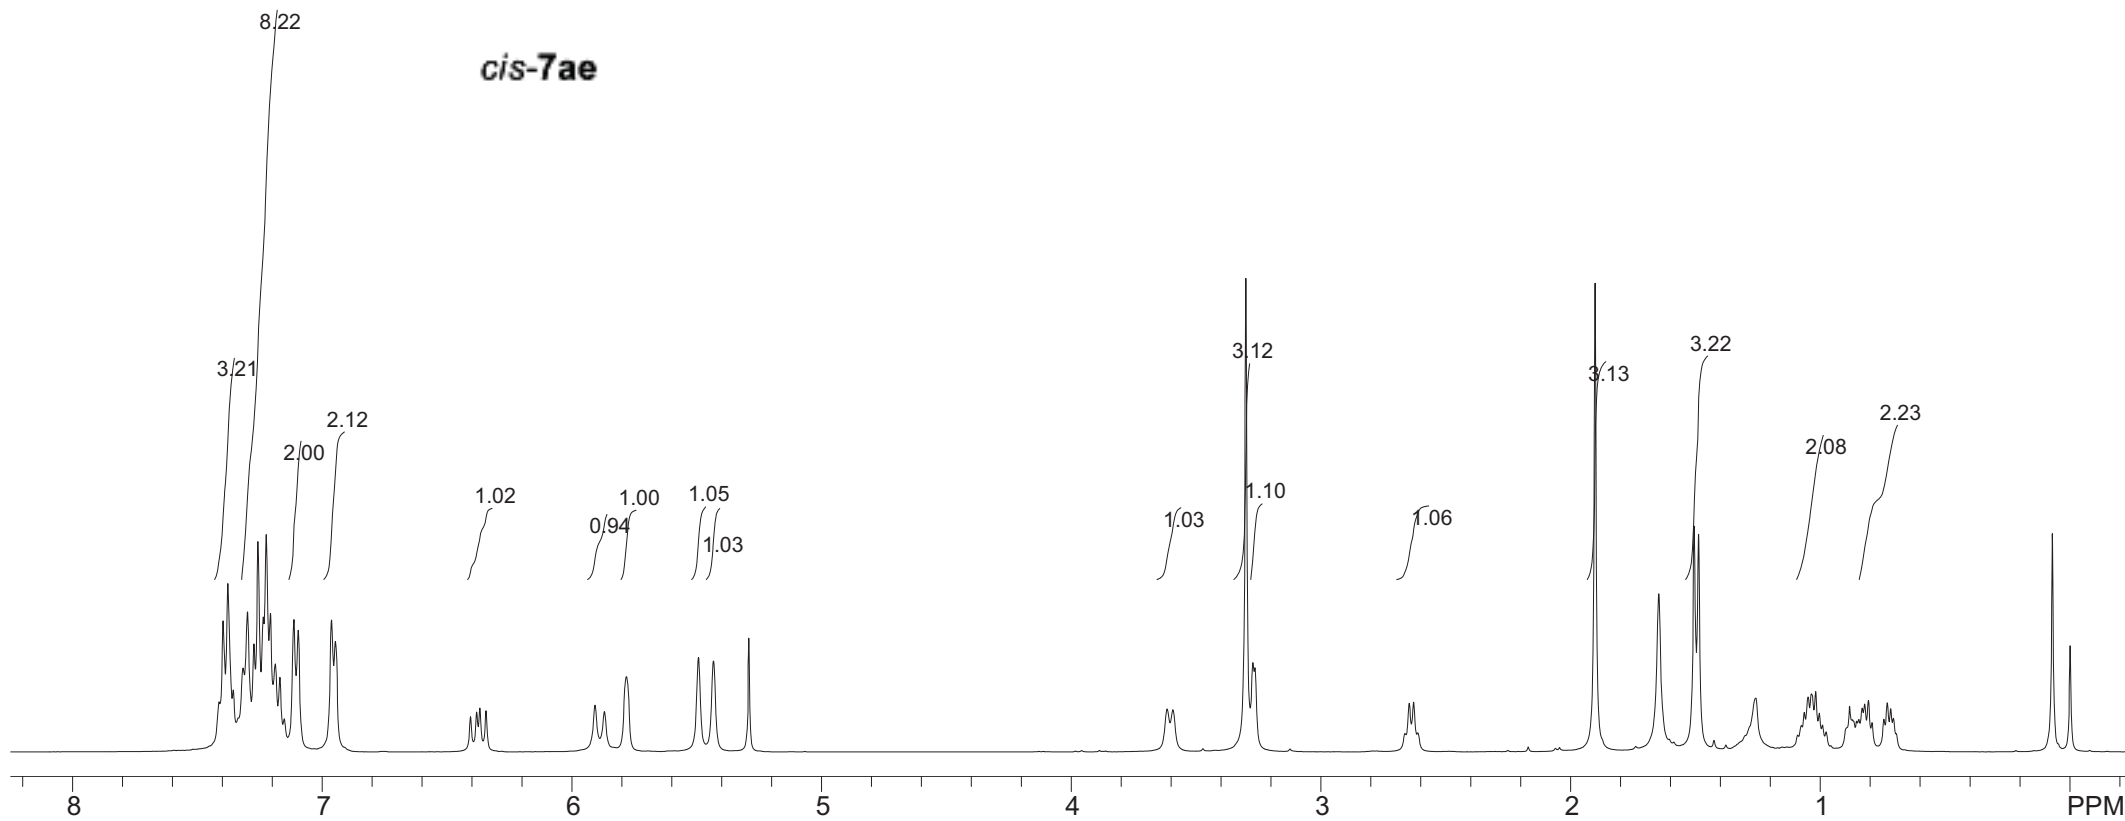

171.770  
 164.930  
 143.325  
 143.165  
 140.453  
 139.198  
 136.996  
 129.698  
 129.275  
 128.407  
 128.203  
 127.846  
 127.787  
 127.547  
 127.335  
 126.351  
 126.220  
 124.922  
 79.999  
 77.833  
 77.330  
 77.009  
 76.696  
 64.045  
 51.270  
 46.334  
 45.072  
 37.584  
 21.761  
 12.246  
 10.620  
 8.498

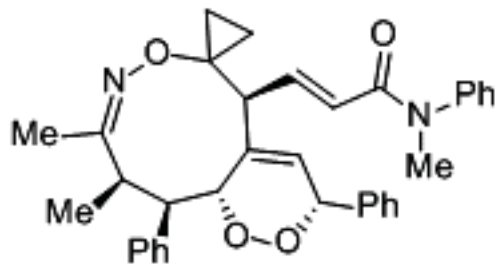

*cis-7ae*

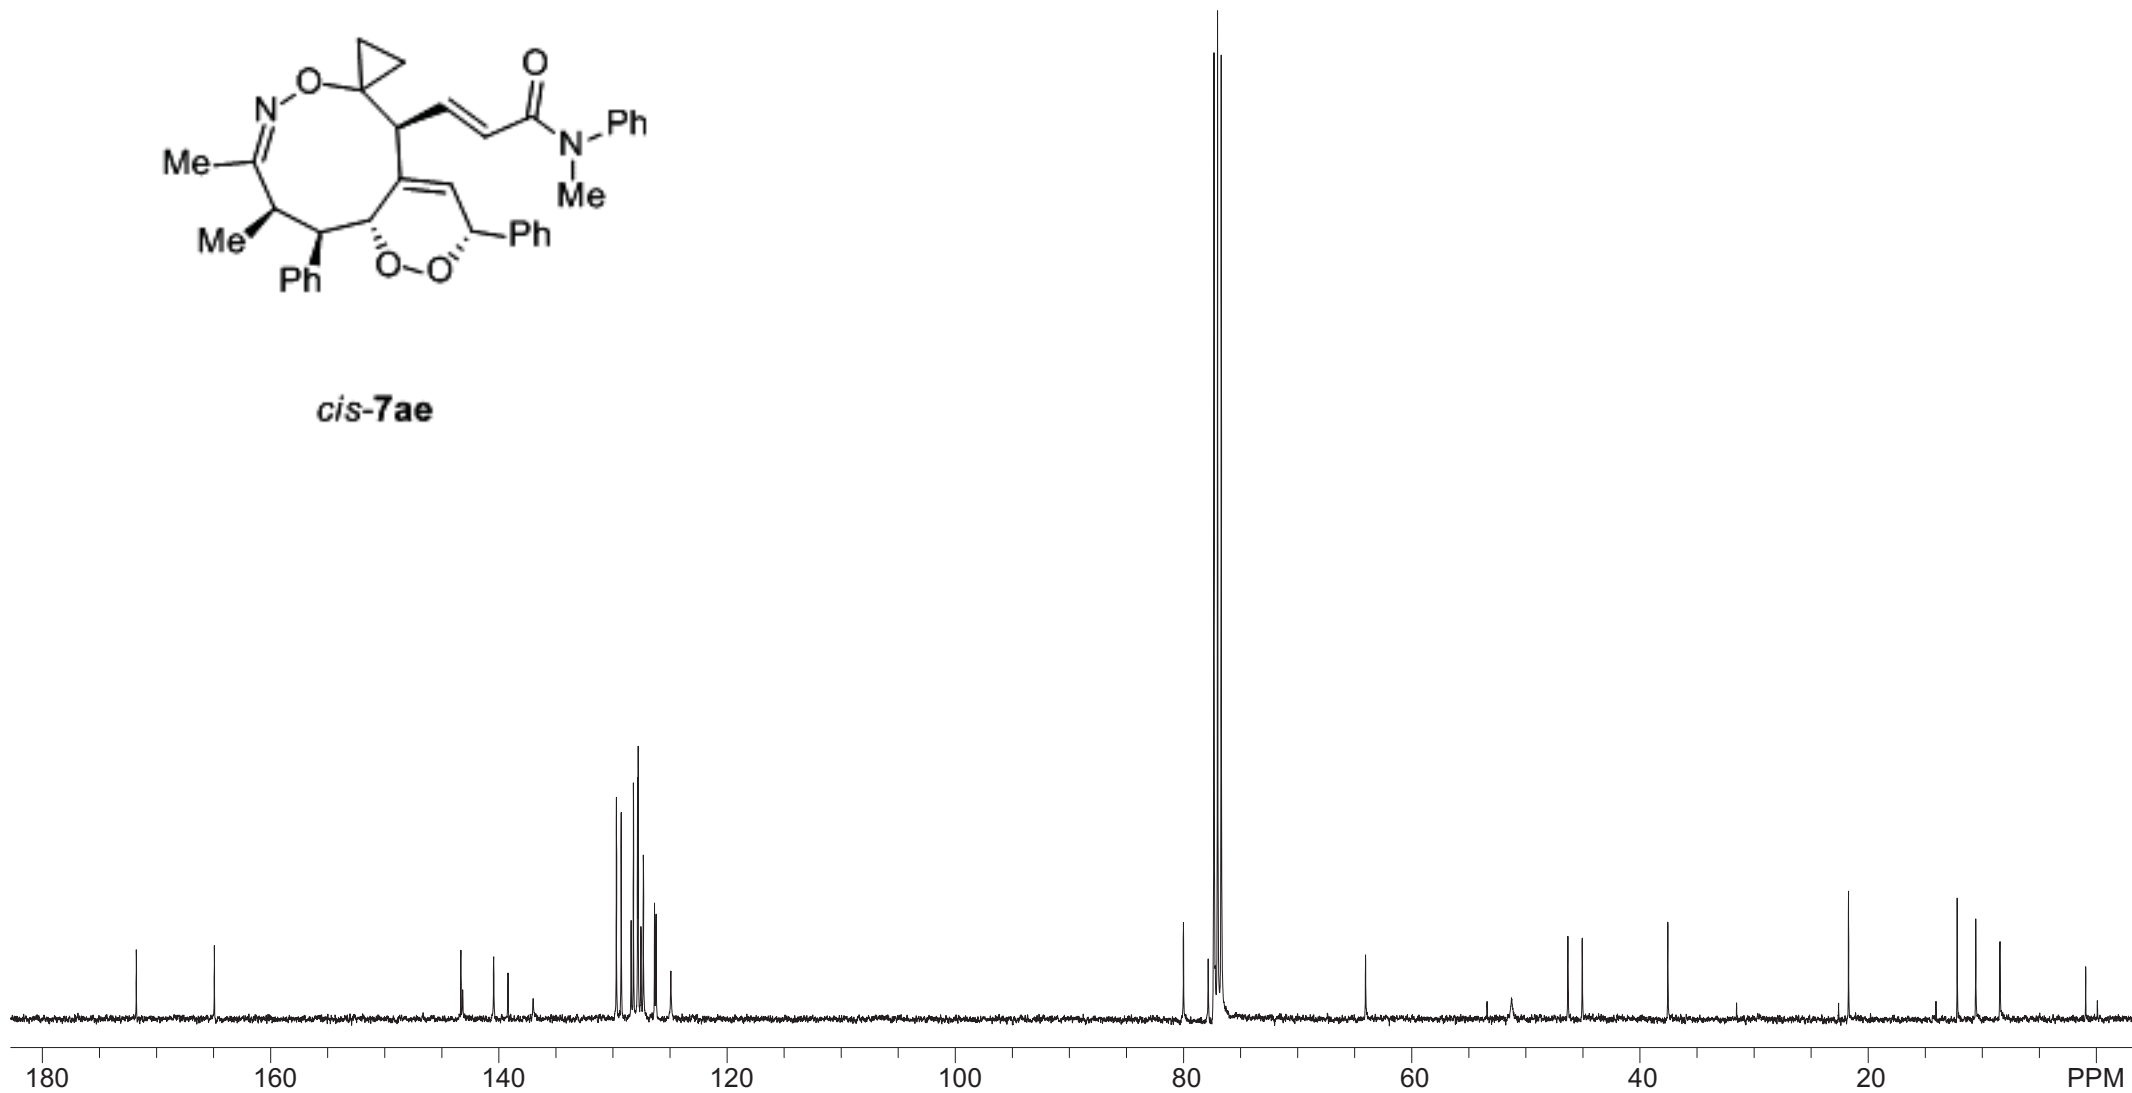

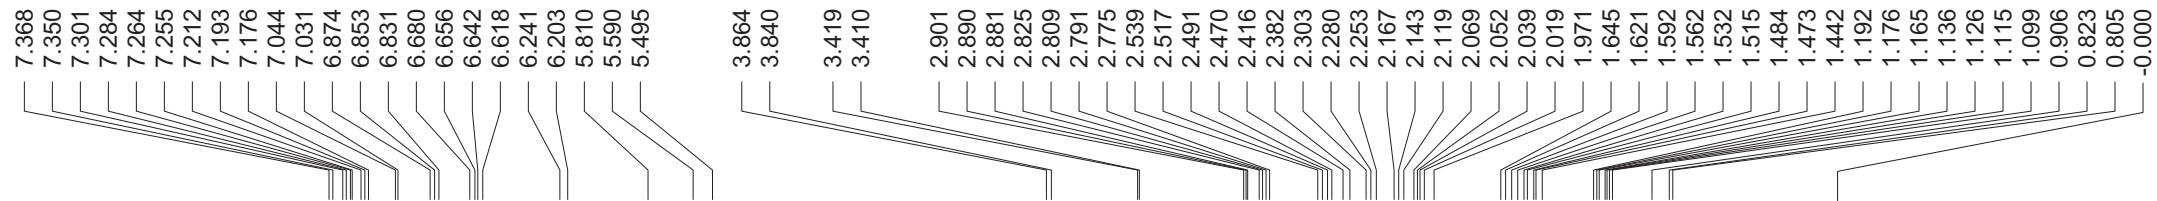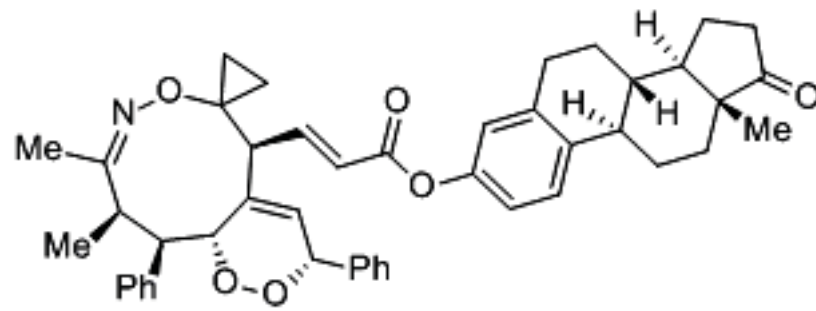

*cis-7af*

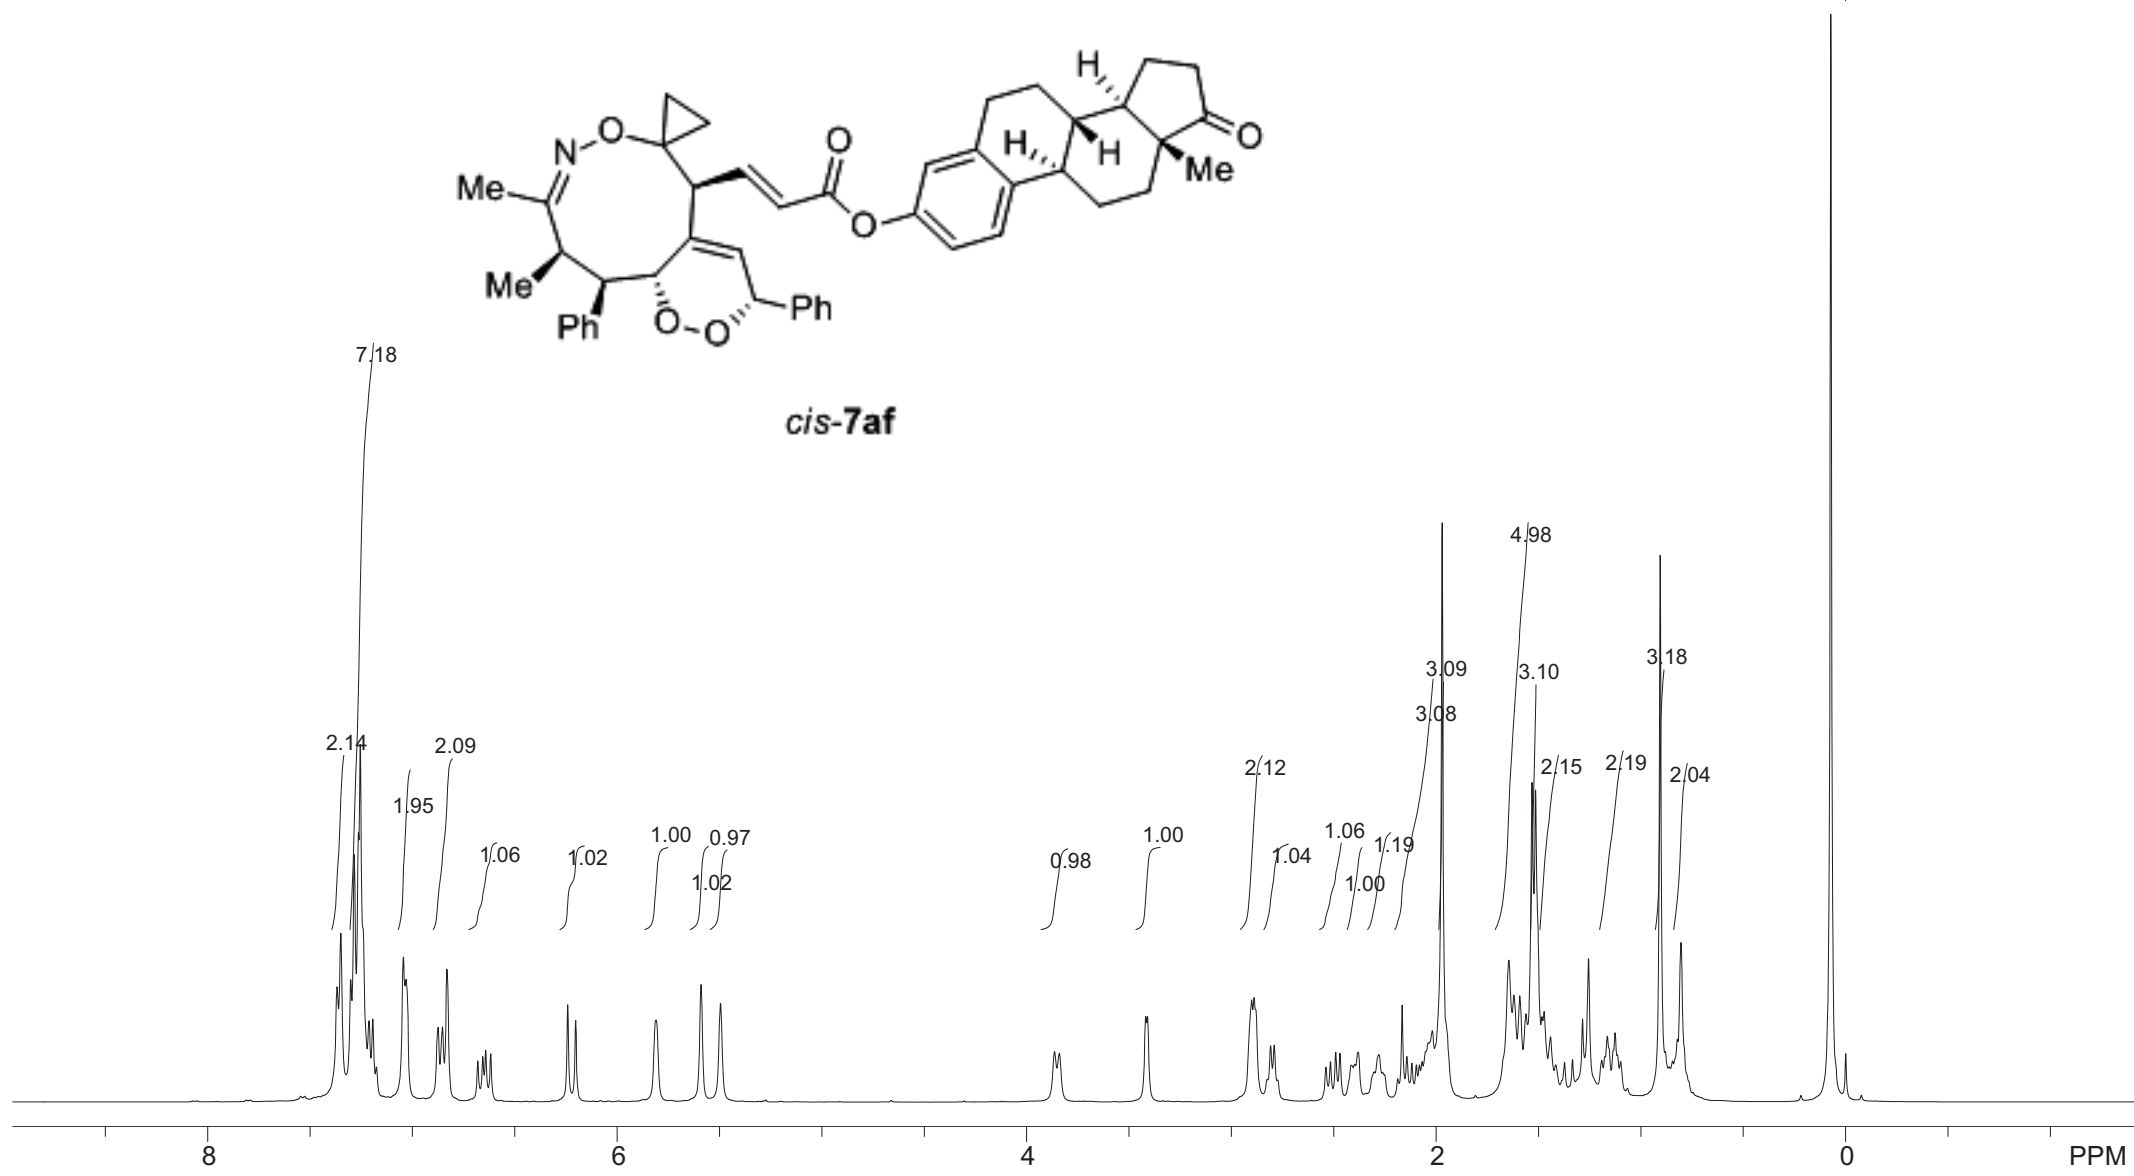

220.737

172.322

164.234

148.336

145.465

142.802

138.965

137.981

137.431

136.636

129.333

128.629

128.331

127.988

127.925

126.489

126.345

125.767

125.036

121.452

118.626

80.078

78.029

77.316

77.000

76.684

64.127

51.732

50.387

47.895

46.153

45.819

44.104

37.947

35.807

31.501

29.335

26.283

25.705

21.544

13.789

12.643

10.891

8.517

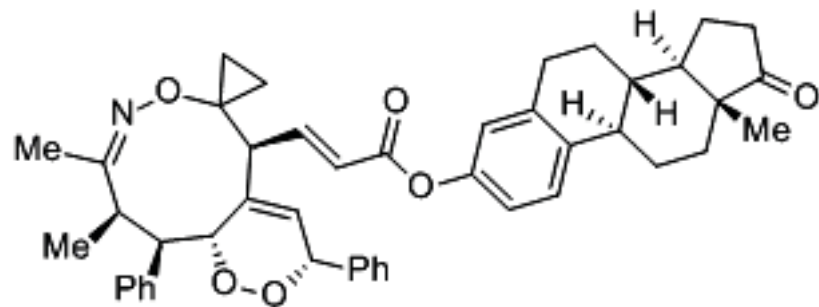

*cis-7af*

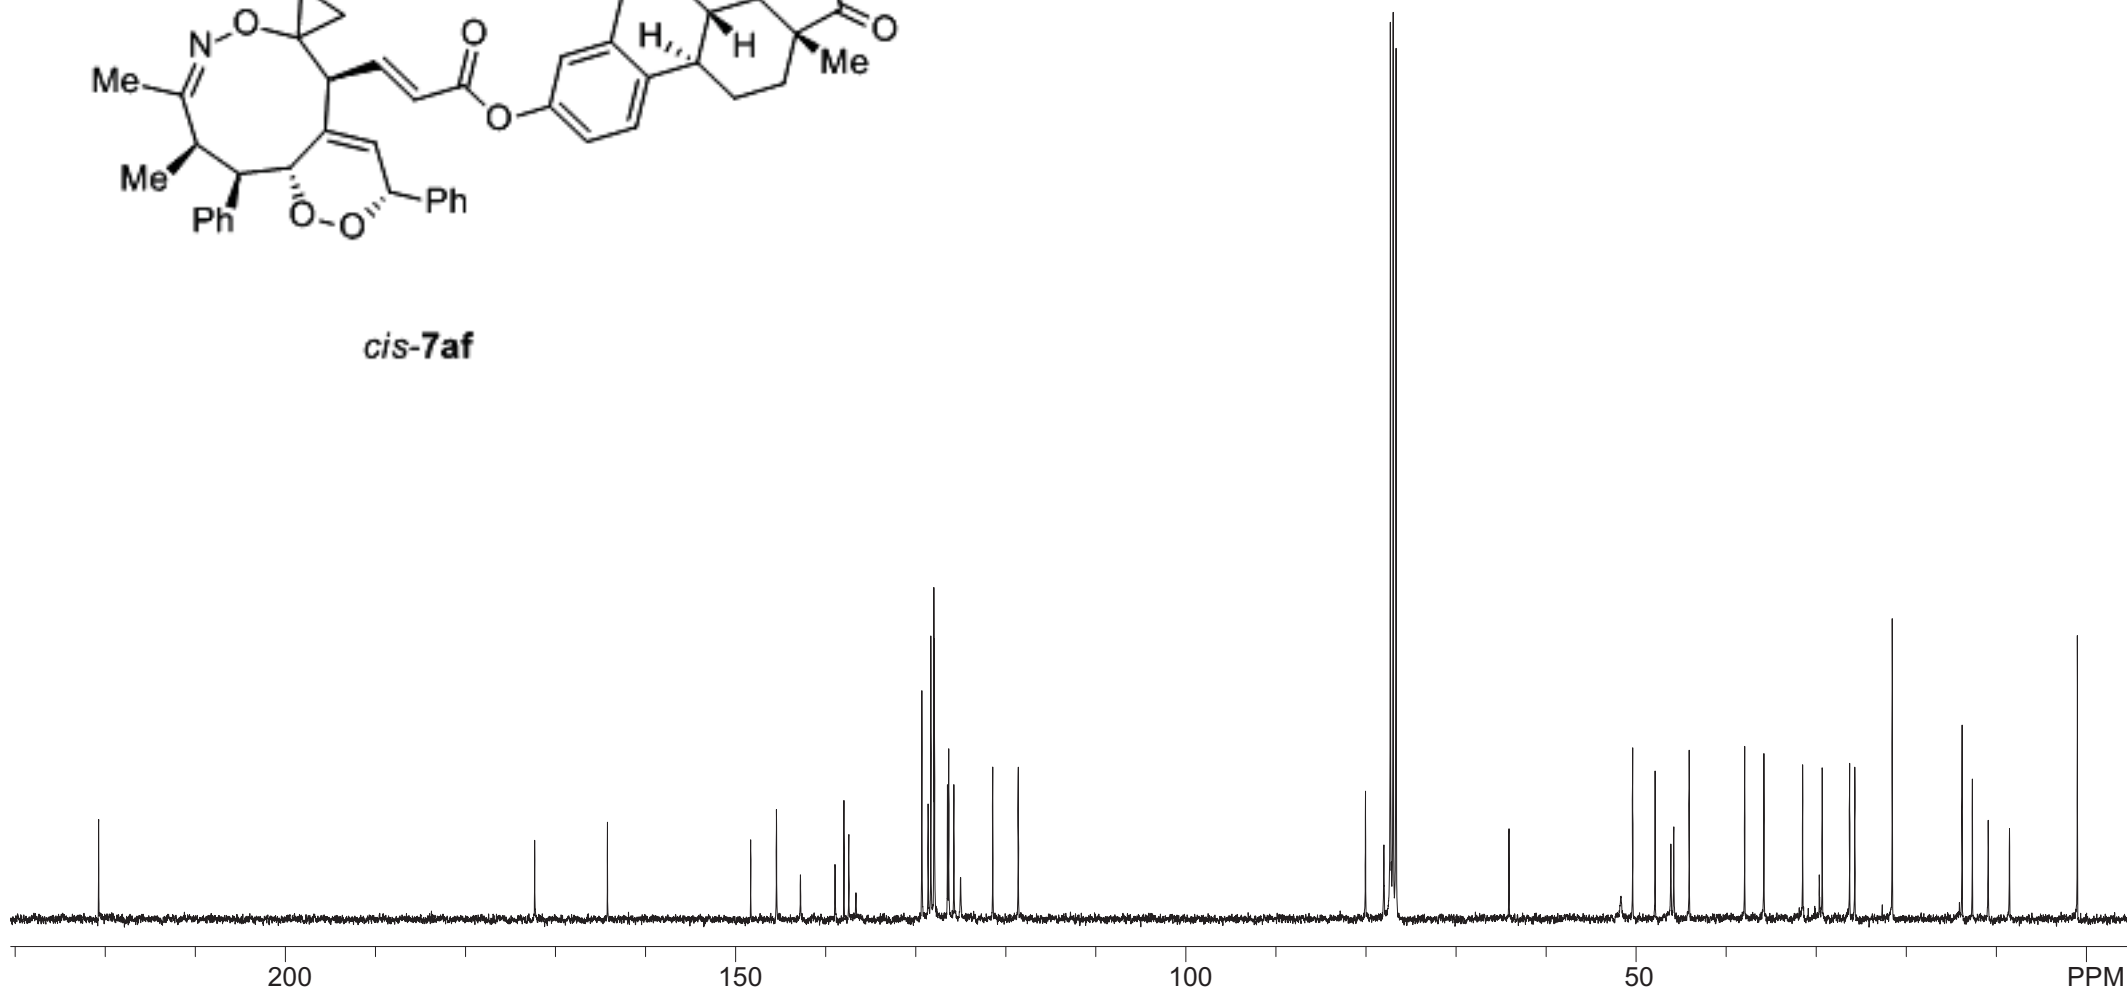

7.345  
7.327  
7.289  
7.270  
7.253  
7.227  
7.213  
7.202  
7.183  
7.165  
7.013  
6.999  
6.468  
6.444  
6.430  
6.405  
6.020  
5.981  
5.794  
5.541  
5.469  
5.362  
4.650  
4.640  
4.628  
3.781  
3.758  
3.379  
3.372  
2.773  
2.756  
2.324  
2.306  
2.020  
1.989  
1.954  
1.871  
1.838  
1.613  
1.569  
1.521  
1.503  
1.467  
1.425  
1.333  
1.327  
1.127  
1.114  
1.081  
1.018  
0.920  
0.905  
0.870  
0.854  
0.787  
0.771  
0.753  
0.674  
-0.000

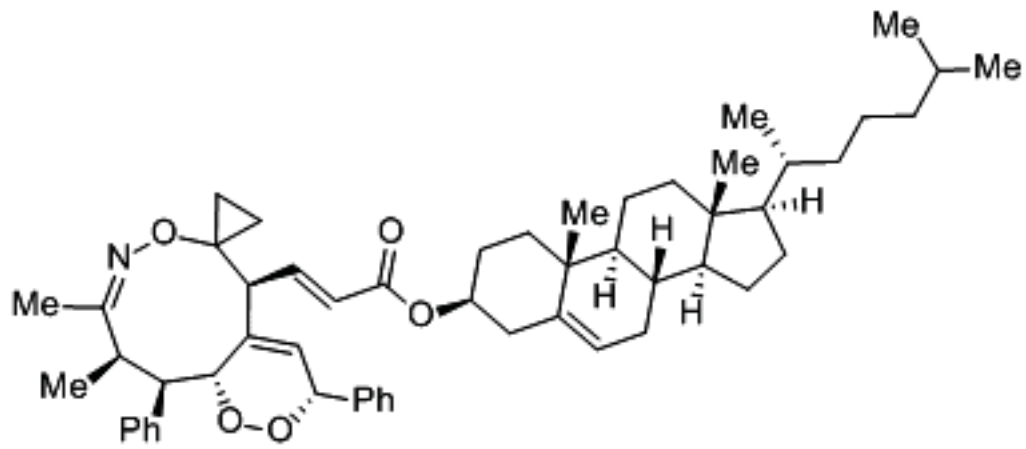

*cis-7ag*

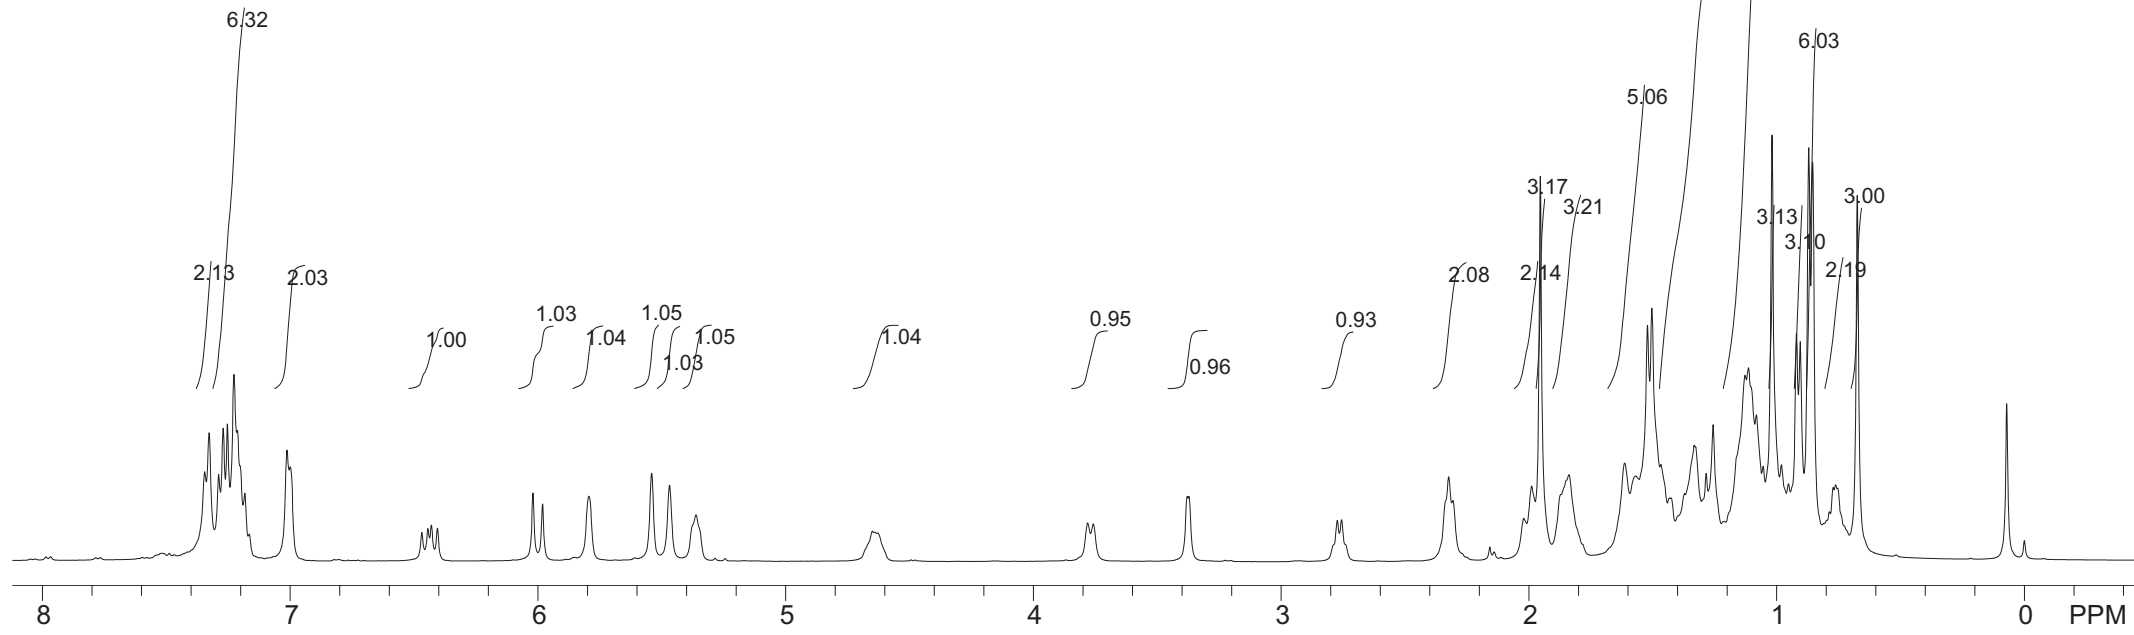



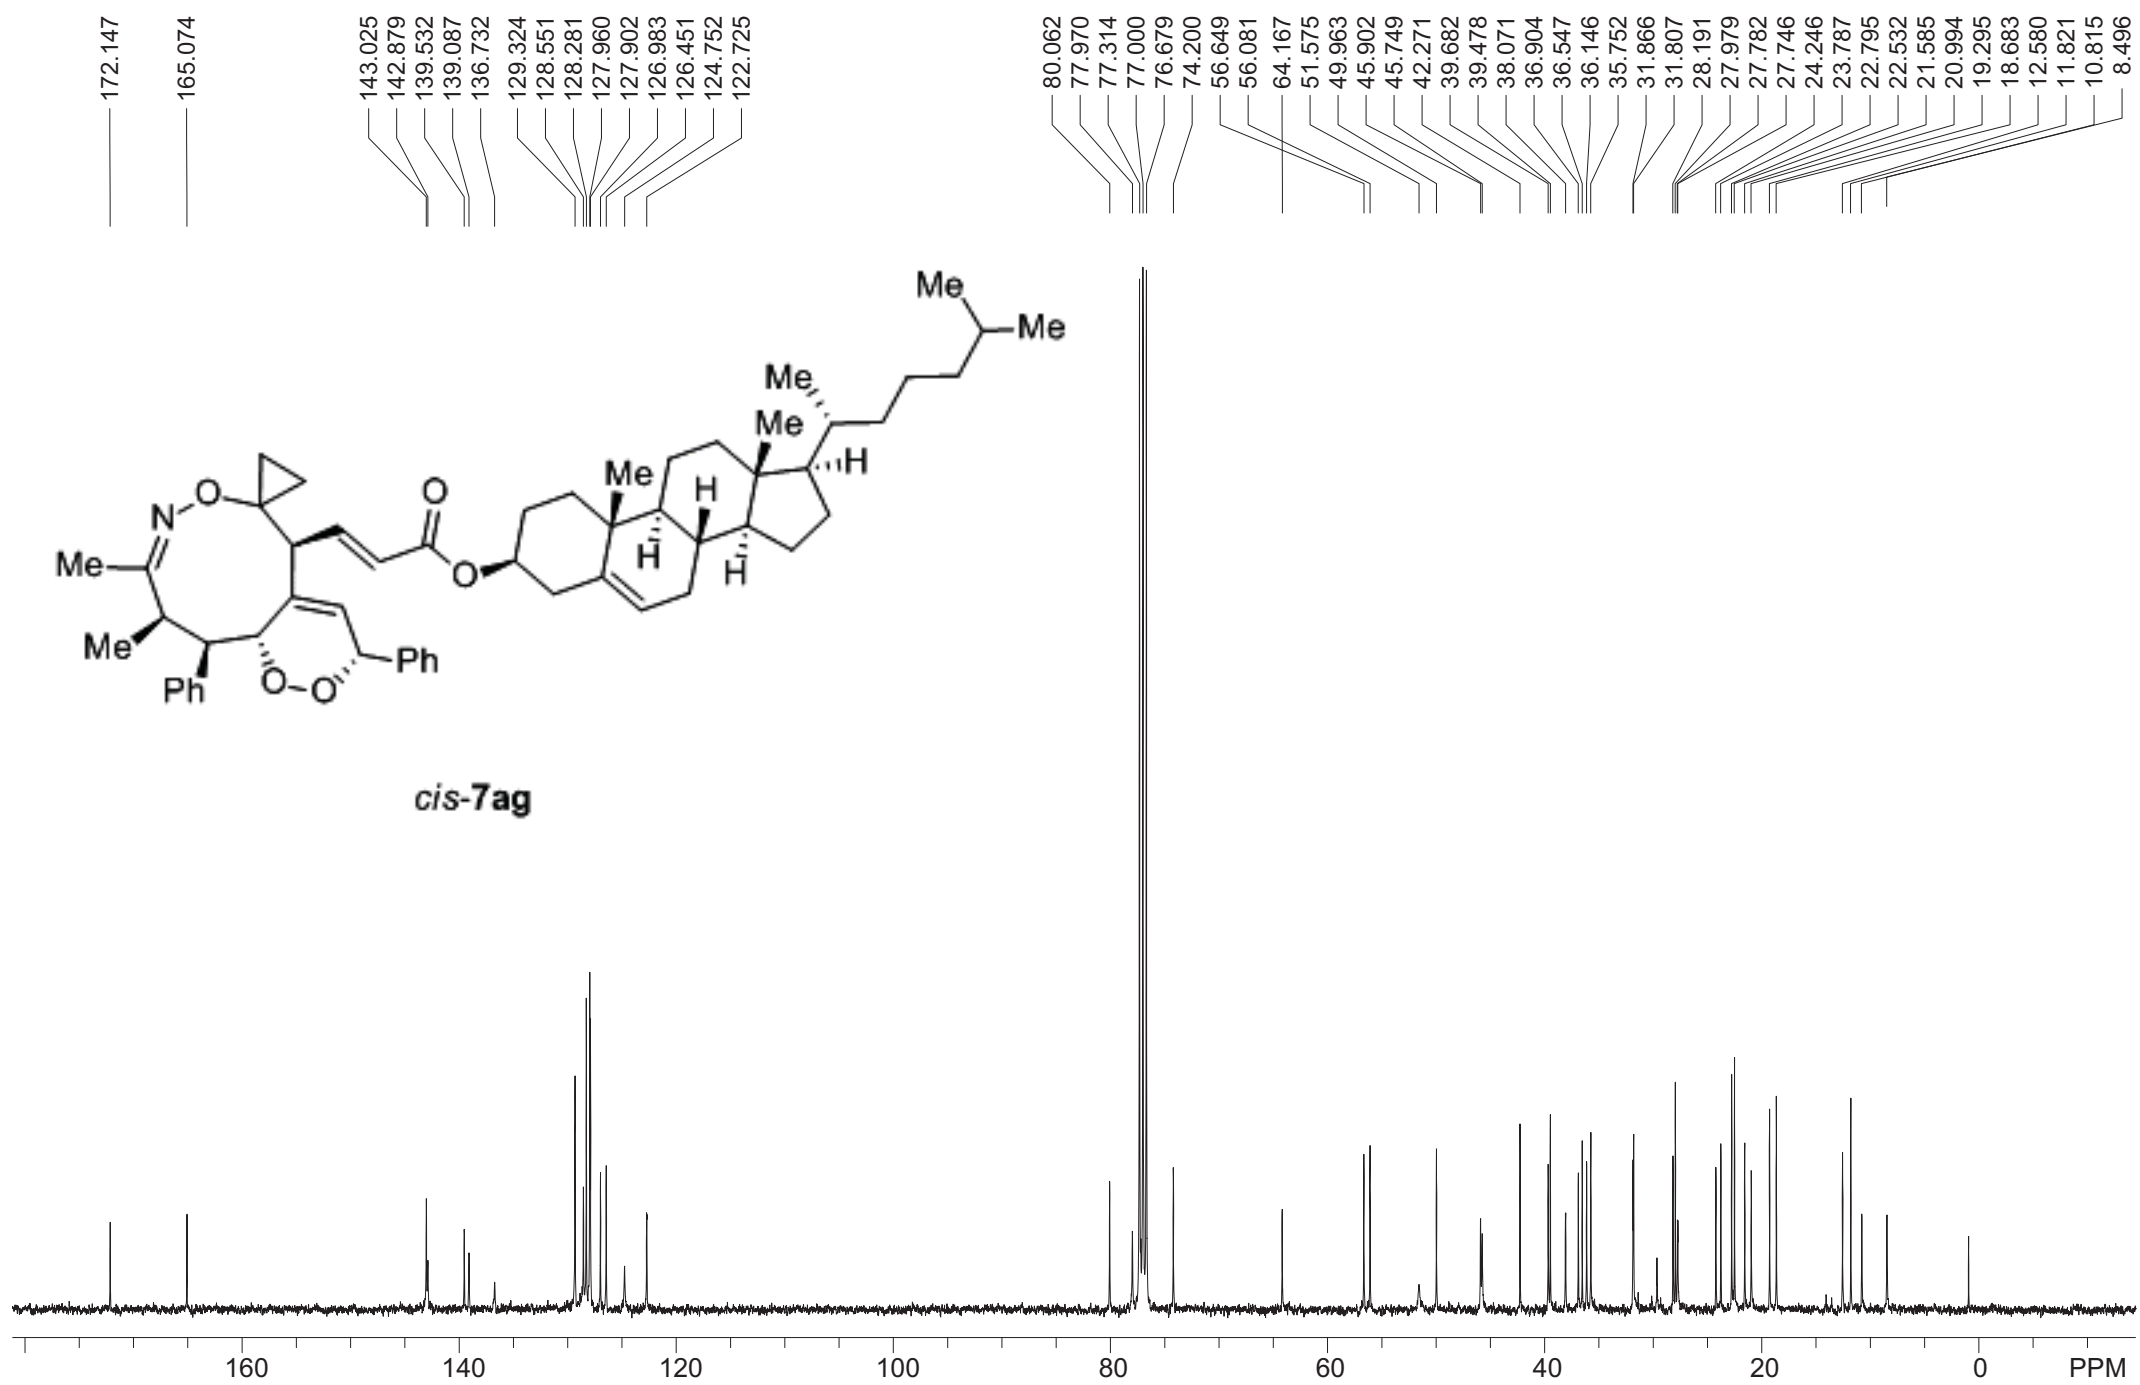

7.398  
7.379  
7.270  
7.254  
7.239  
7.220  
7.196  
7.173  
7.158  
6.578  
6.539  
6.135  
6.119  
6.100  
6.079  
6.063  
5.950  
5.928  
5.755  
5.733

4.948  
4.920  
4.672  
4.655  
4.641  
4.625  
4.563  
4.546  
4.532  
4.515  
4.035  
3.878  
3.867  
3.540  
3.535  
3.512  
3.507  
3.253  
2.959

1.745  
1.731  
1.717  
1.700  
1.246  
1.160  
1.143  
1.128  
1.115  
0.916  
0.905  
0.890  
0.874  
0.836  
0.818  
0.703  
0.685  
0.669  
0.659  
0.642  
0.000

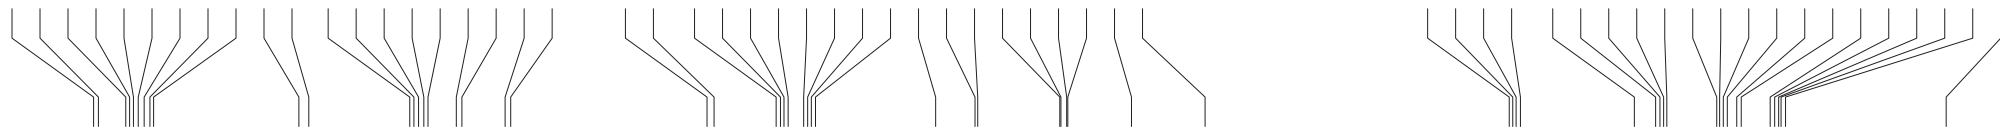

12.08

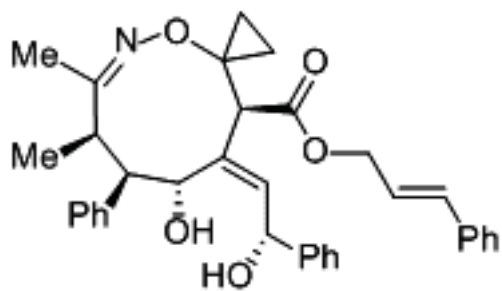

**8**

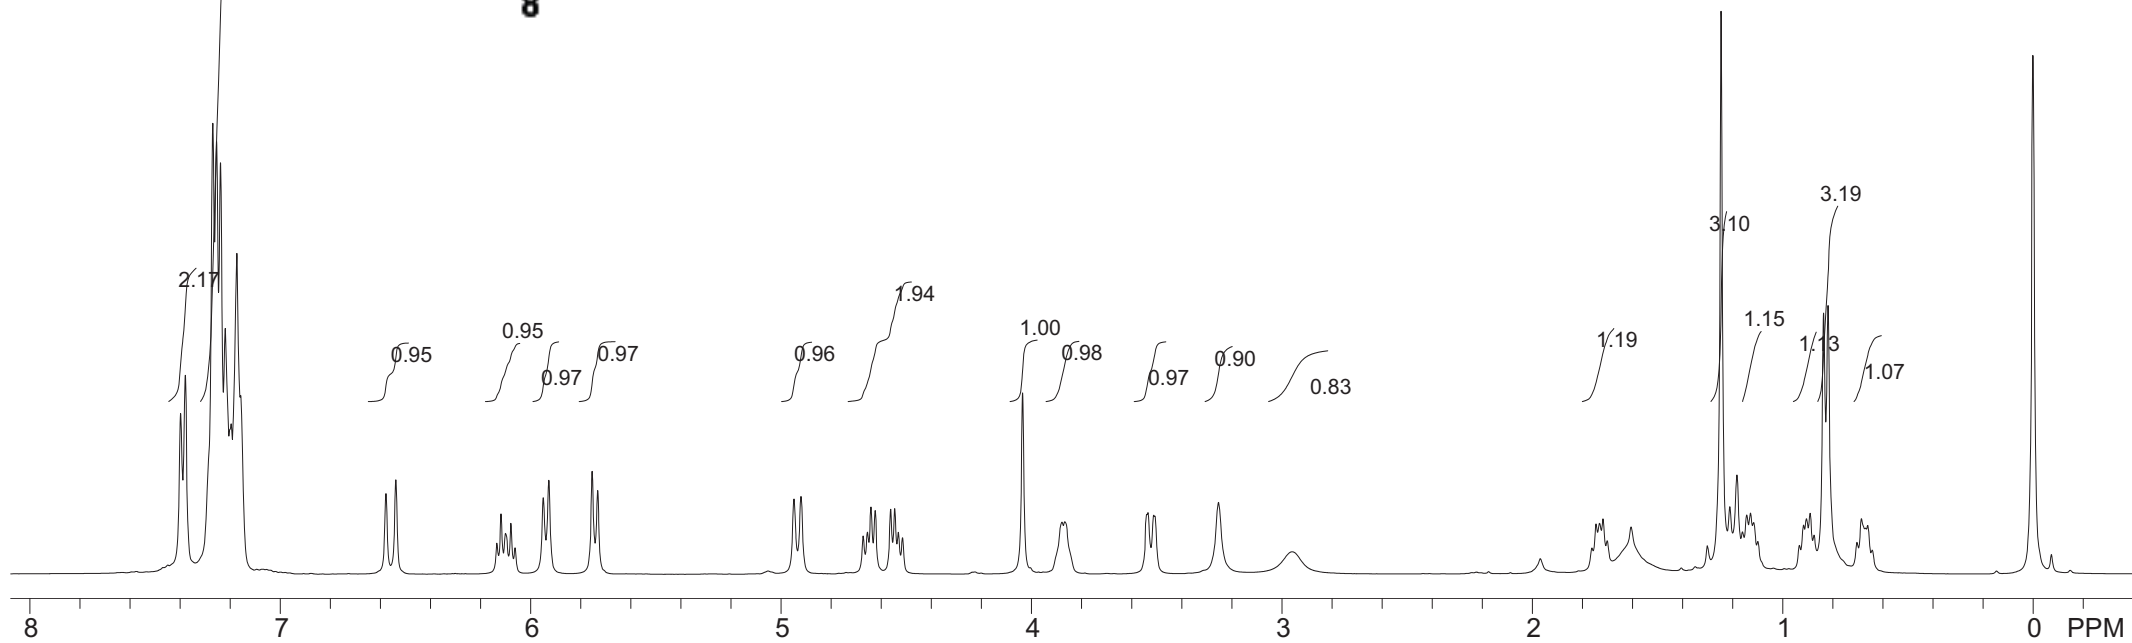

172.067  
170.616  
143.717  
141.019  
138.854  
135.755  
135.704  
135.616  
129.280  
128.631  
128.493  
128.354  
128.113  
127.341  
127.020  
126.699  
125.758  
121.661

77.314  
77.000  
76.679  
71.021  
69.978  
65.997  
62.388  
59.785  
55.140

34.170

18.705  
15.715  
10.290  
9.911

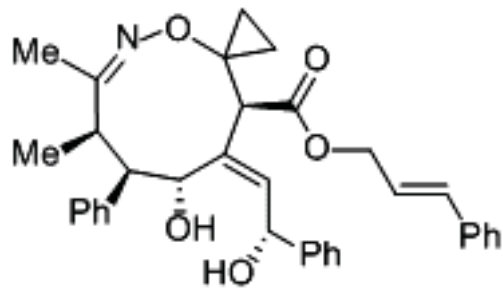

8

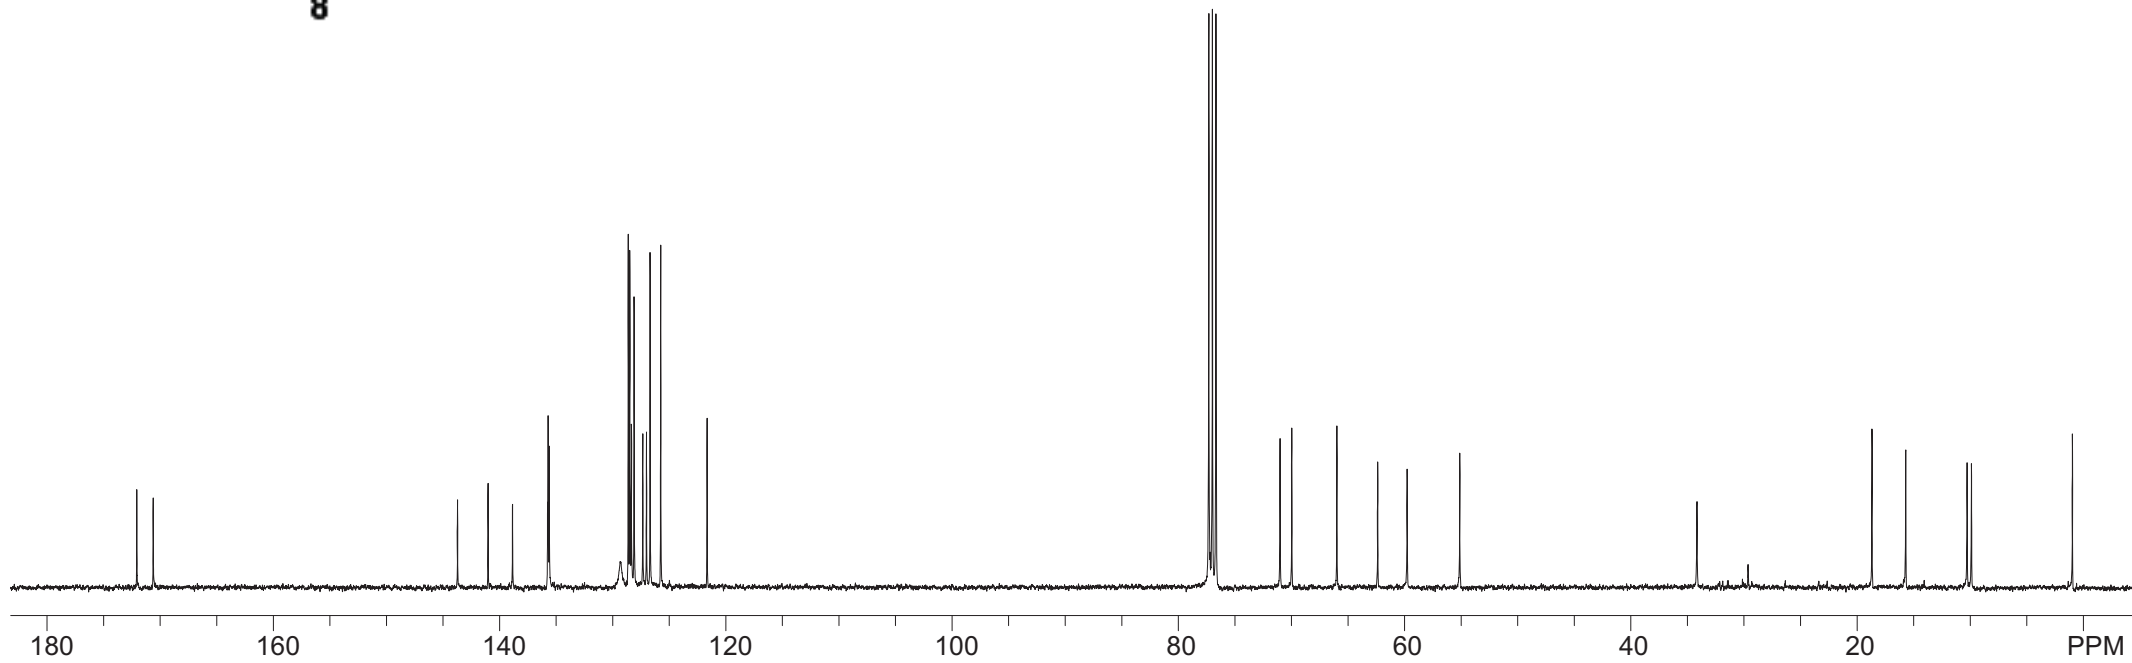

7.330  
7.312  
7.285  
7.270  
7.259  
7.249  
7.201  
7.183  
7.165  
7.135  
7.126

5.807  
5.588  
5.570

3.994  
3.966  
3.949  
3.862  
3.853  
3.836  
3.564  
3.555  
3.140  
3.123

2.654

1.816

1.421  
1.403  
1.145  
0.880  
0.869  
0.854  
0.785  
0.759

-0.000

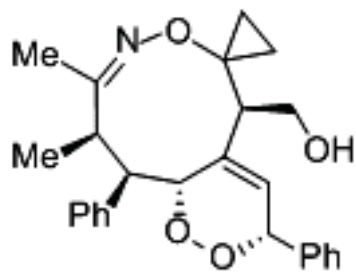

9

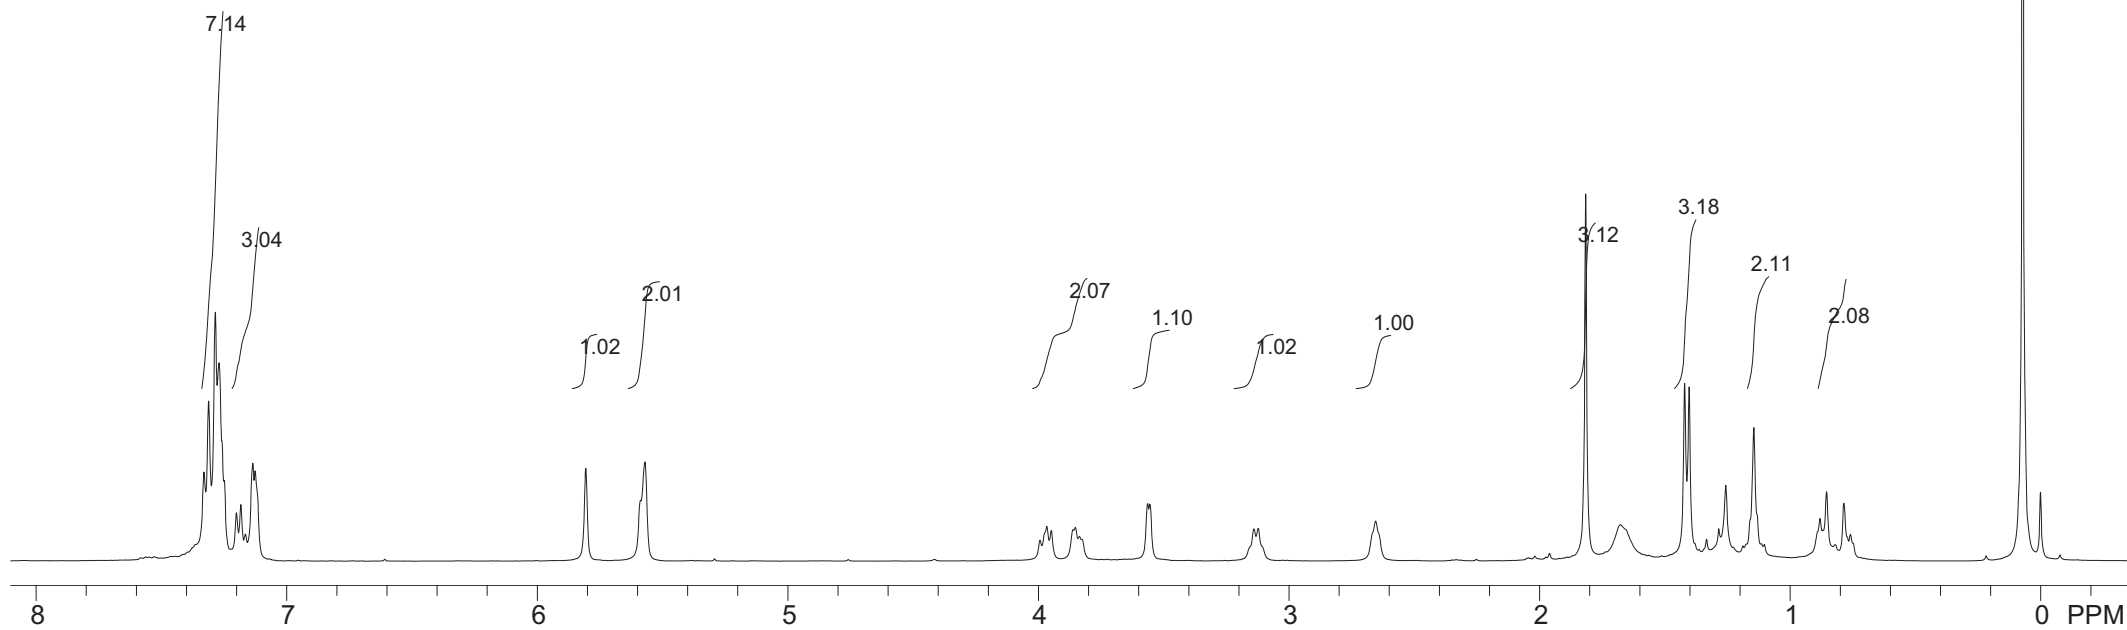

174.116

142.609

137.870

136.579

129.492

128.784

128.434

128.201

127.968

126.546

125.314

80.412

79.107

77.321

77.000

76.687

64.641

62.060

52.202

48.964

43.561

20.571

14.468

10.873

8.635

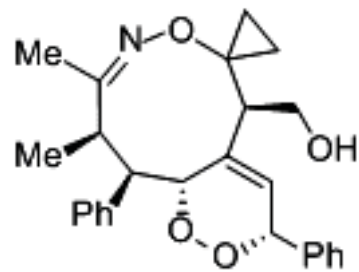

9

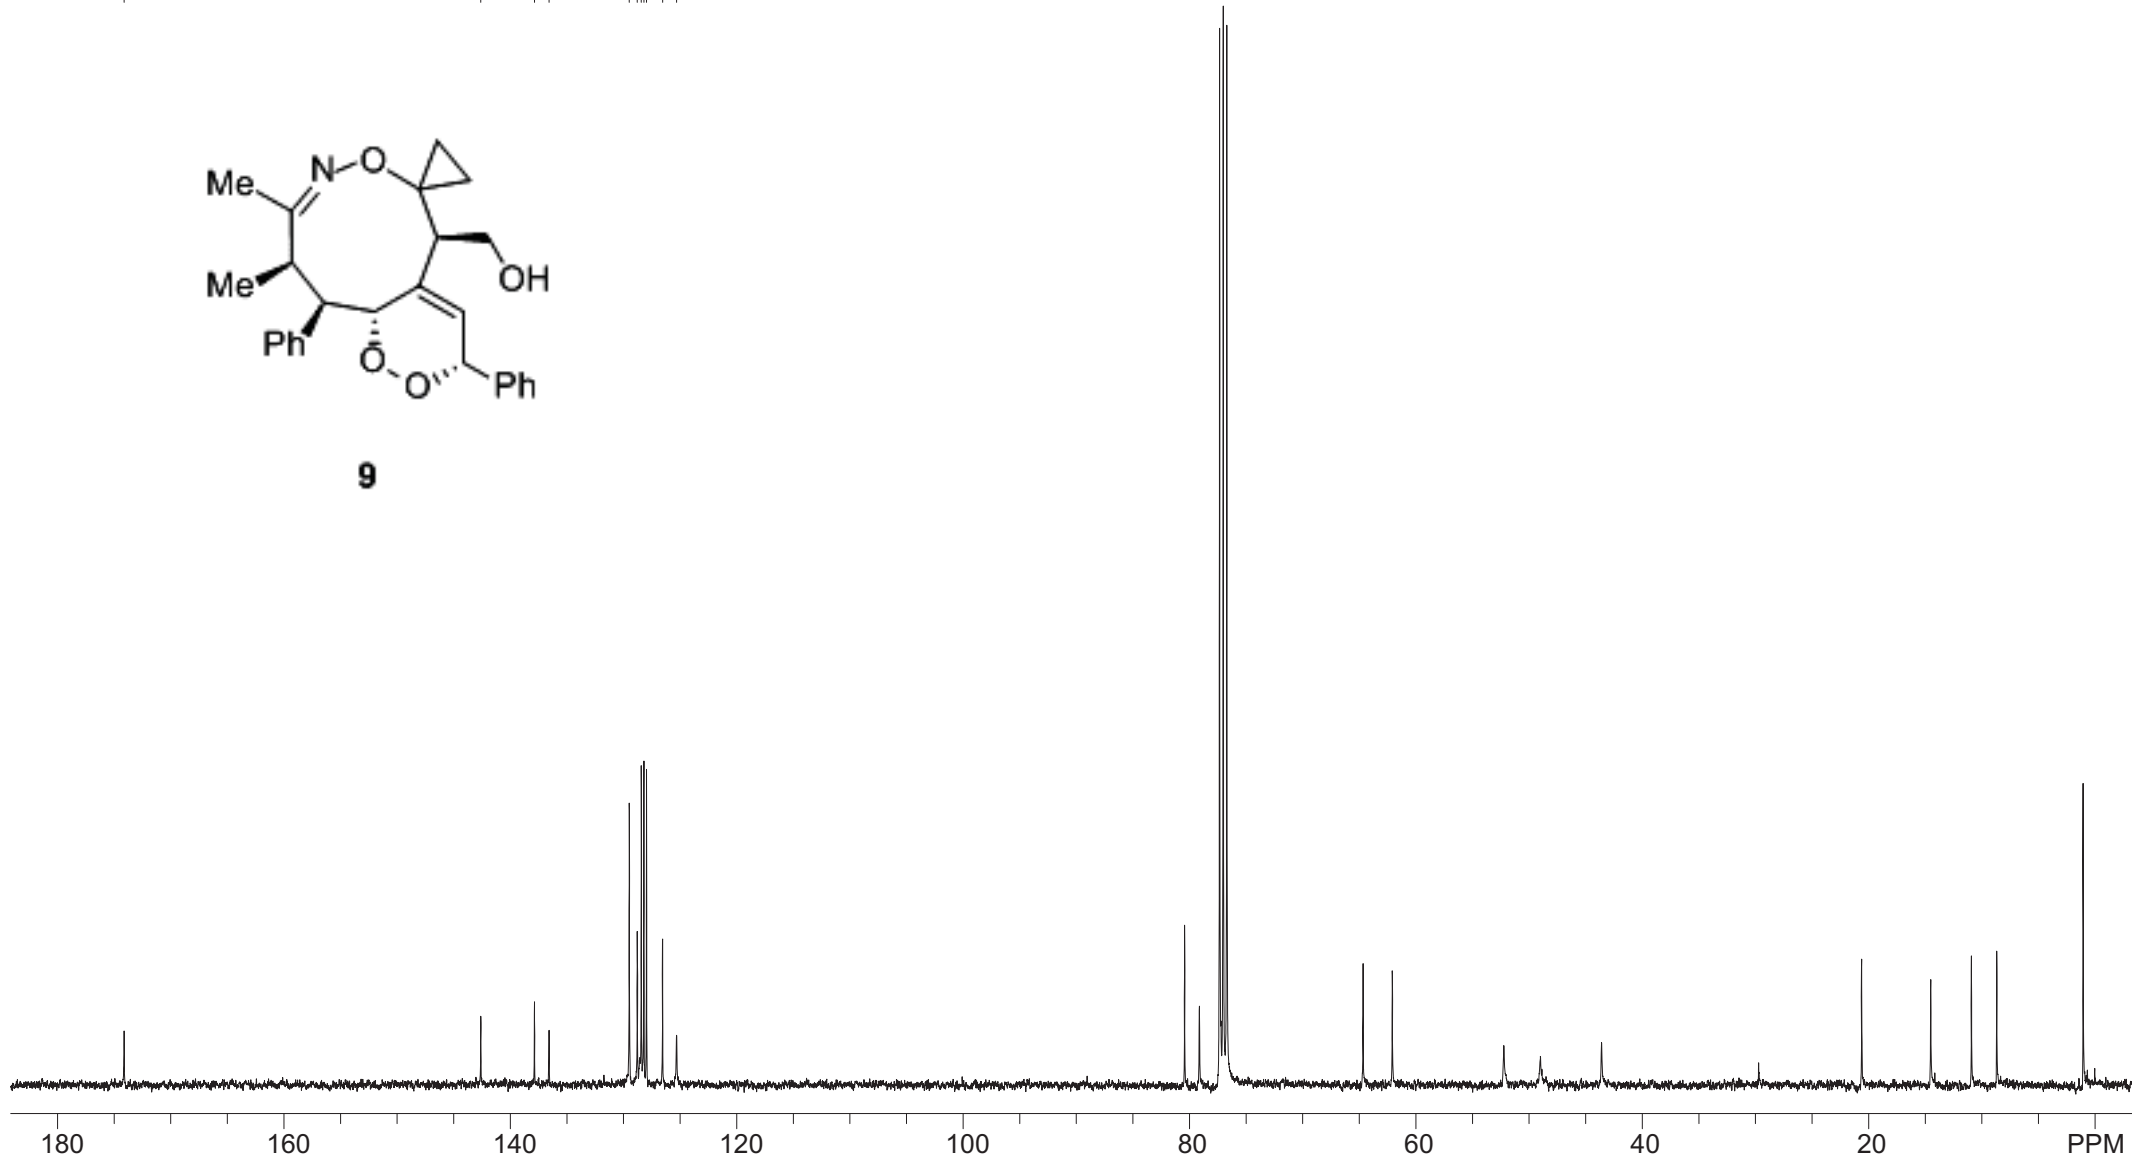

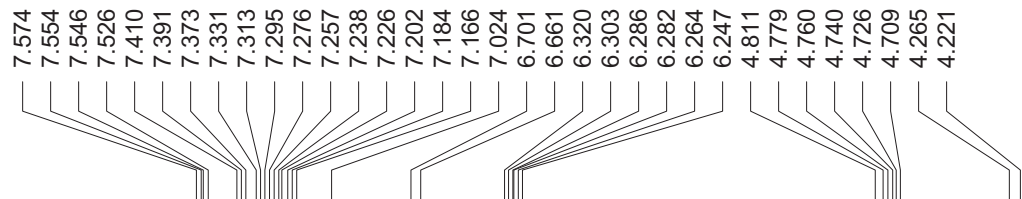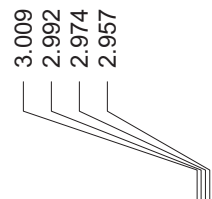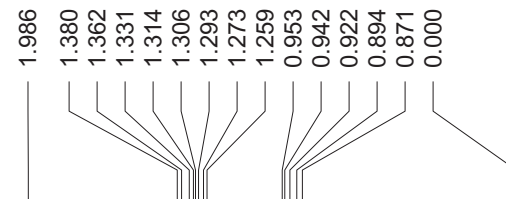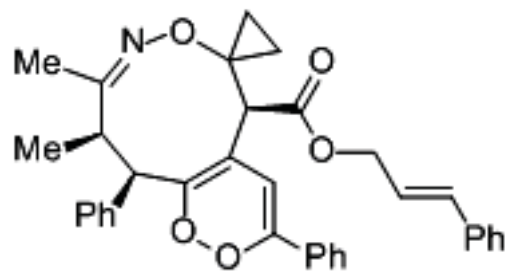

**10**

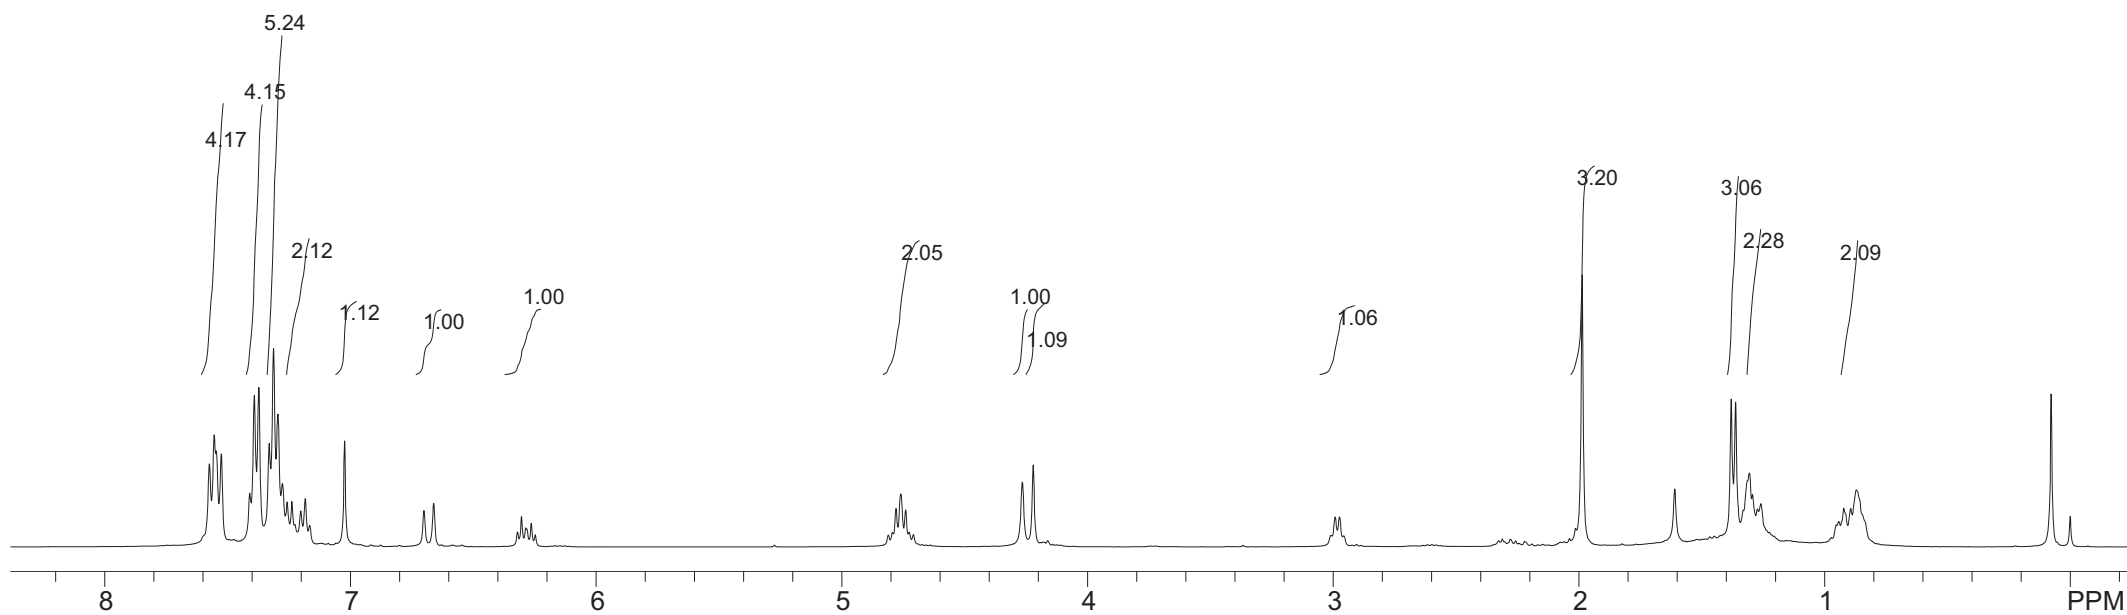

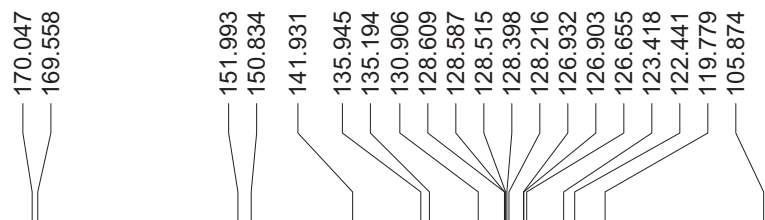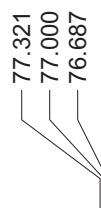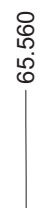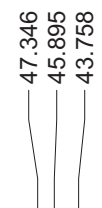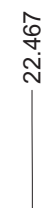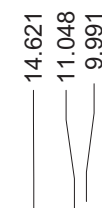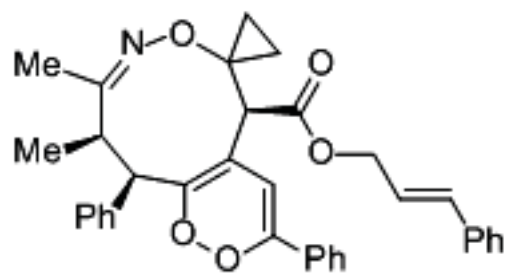

10

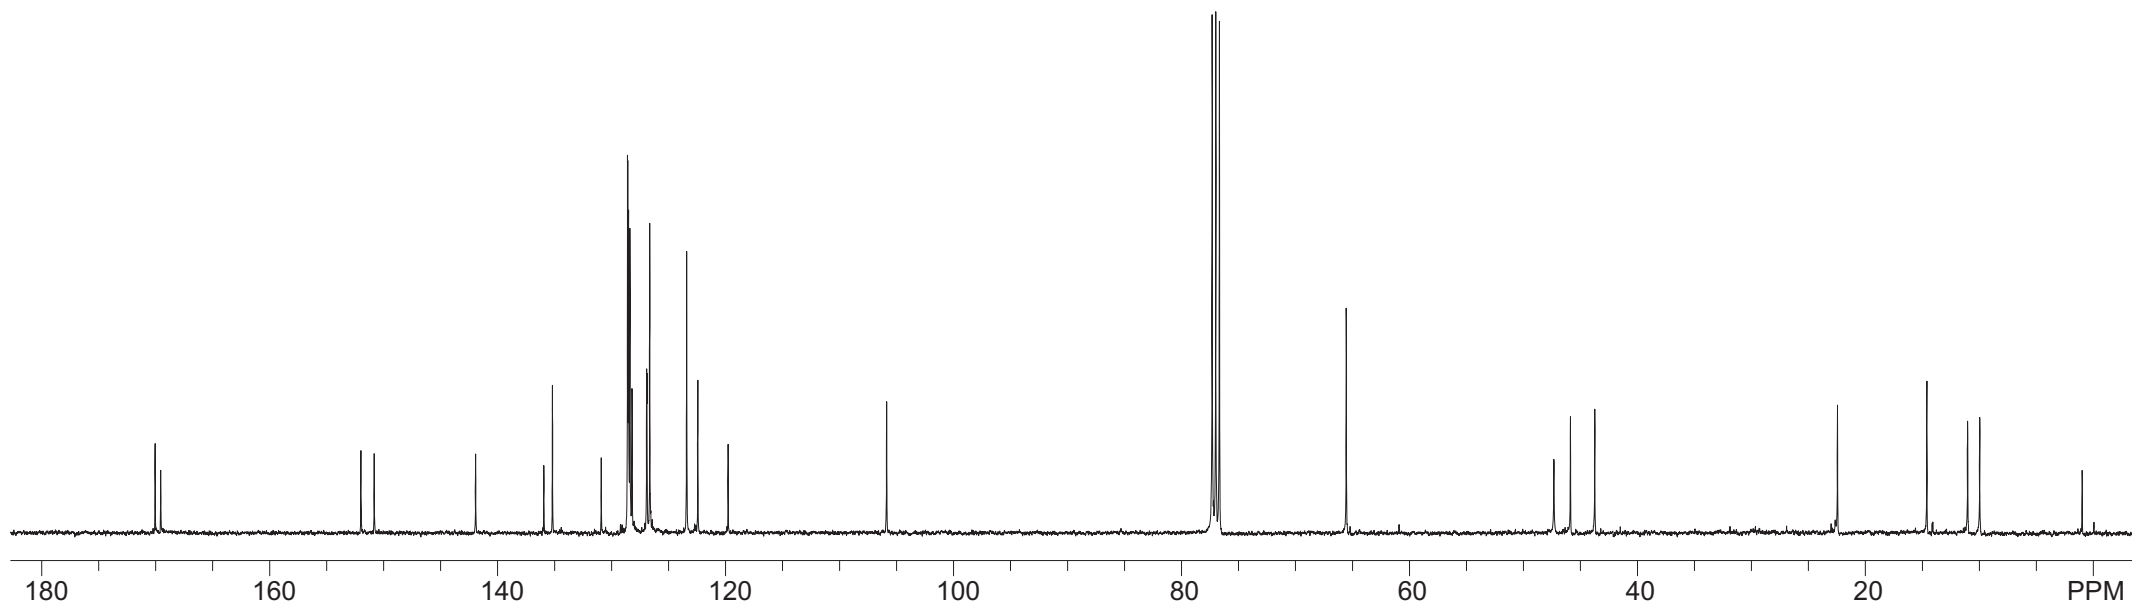

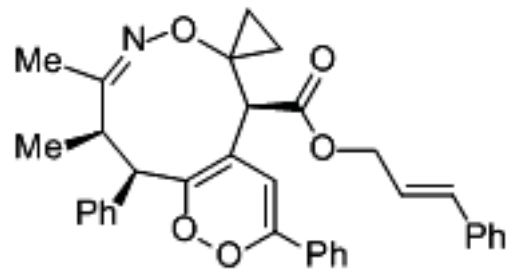

10

COSY

MP-9-250

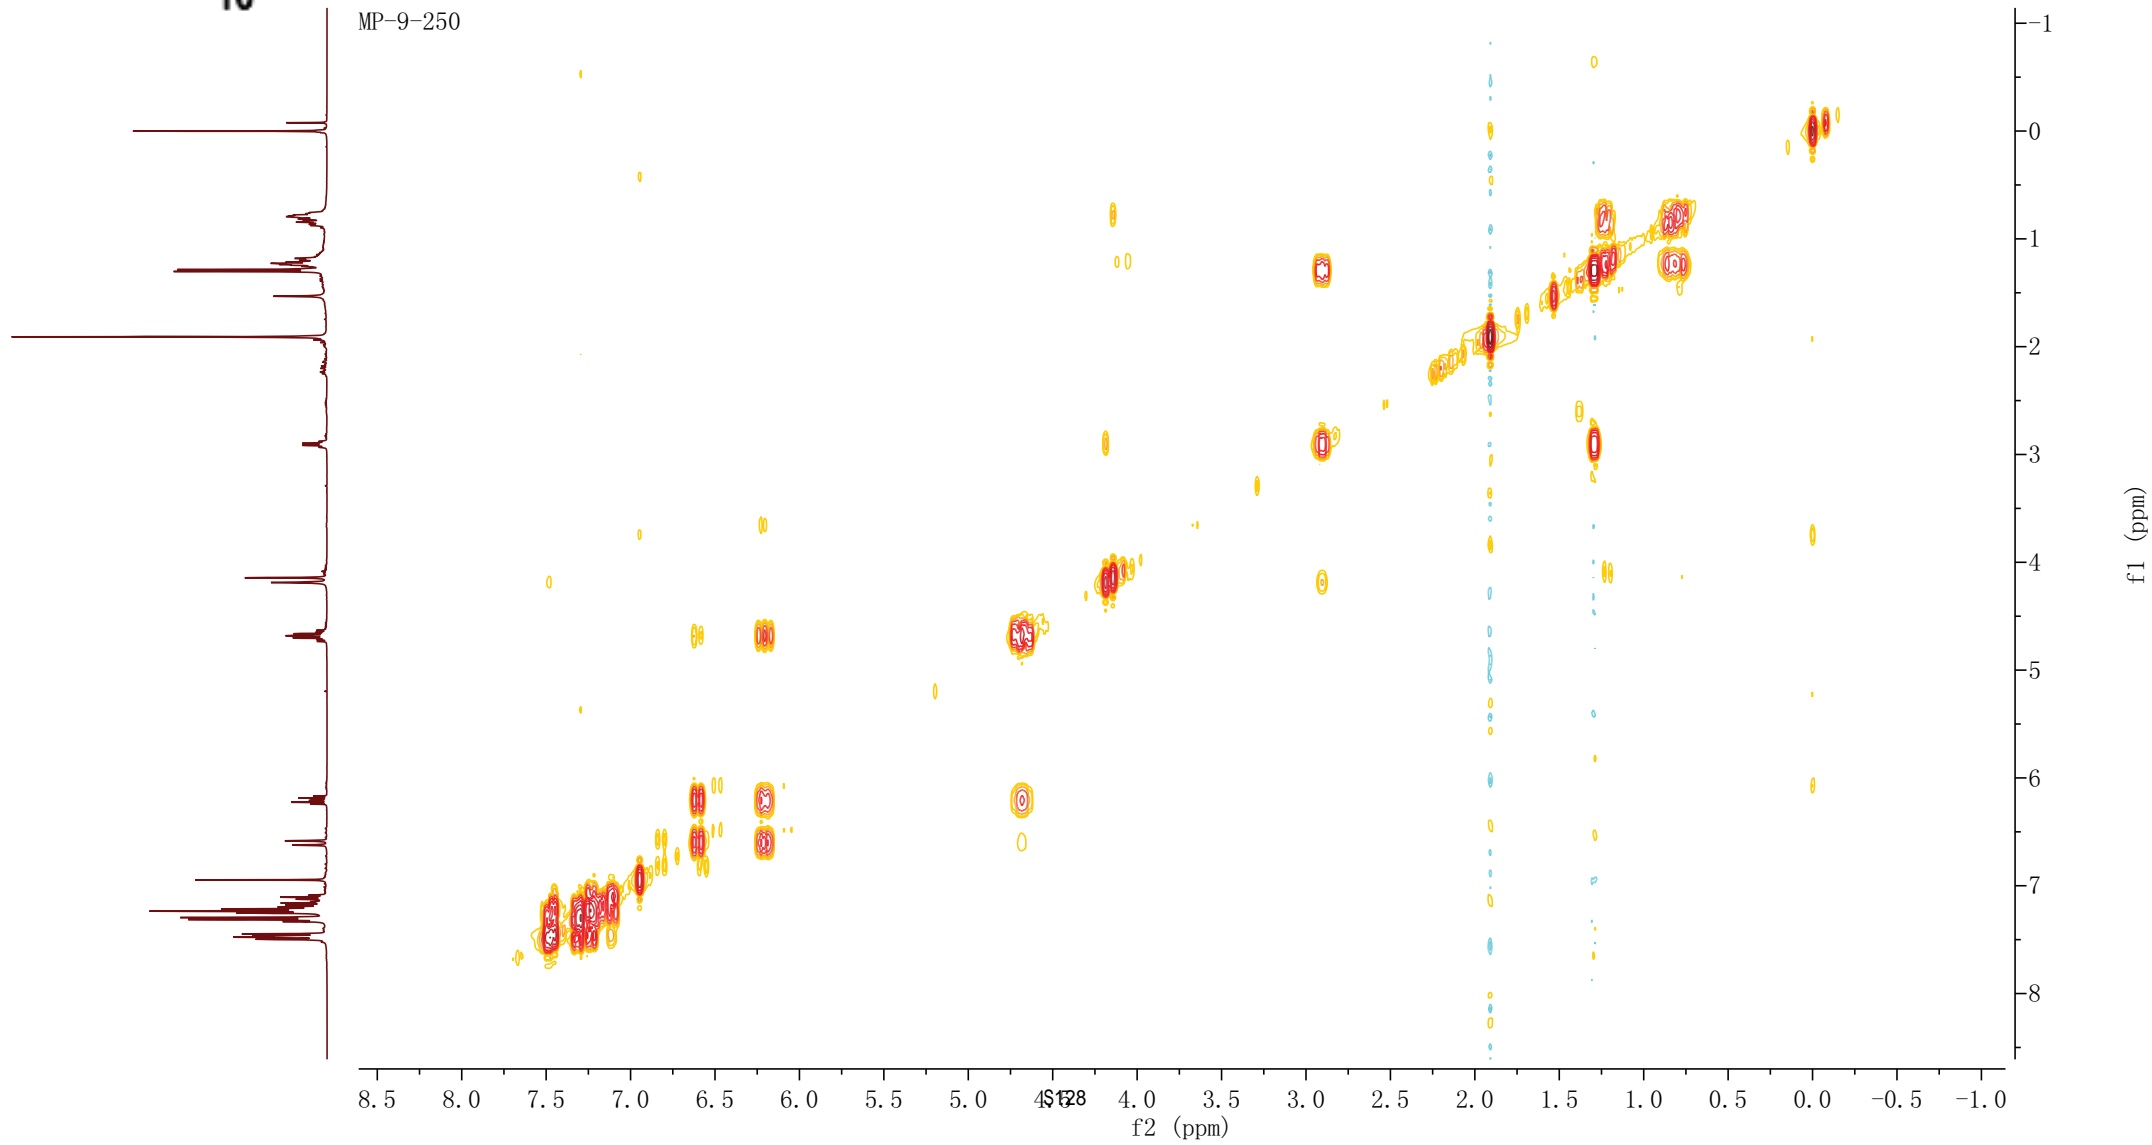



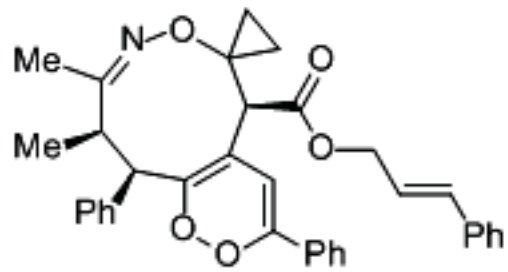

10

HMBC

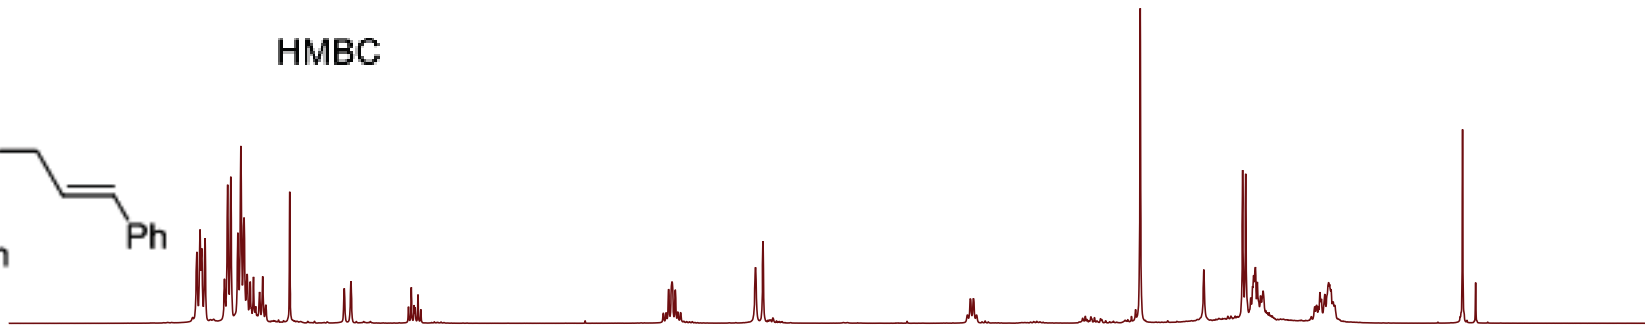

MP-9-250

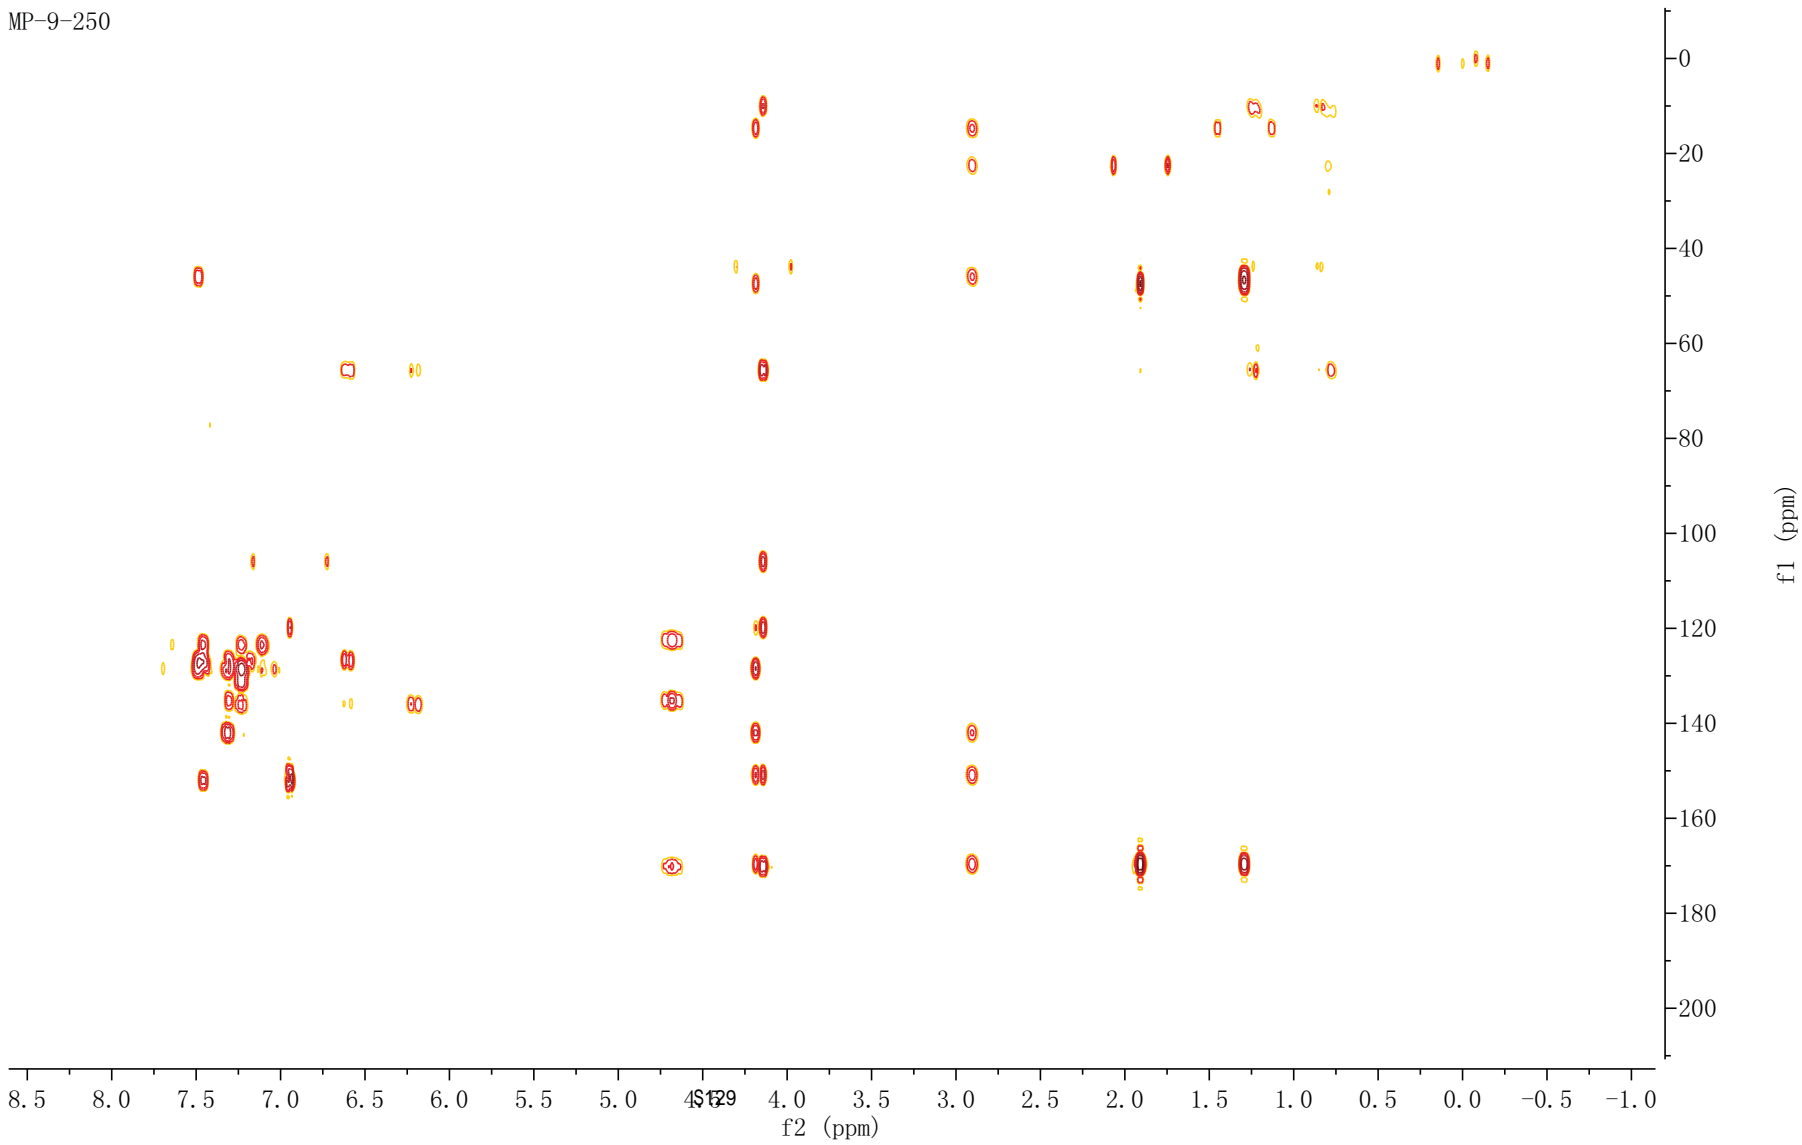

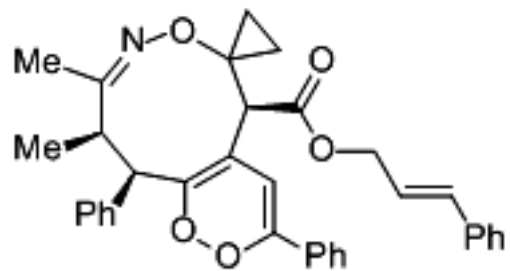

10

HMQC

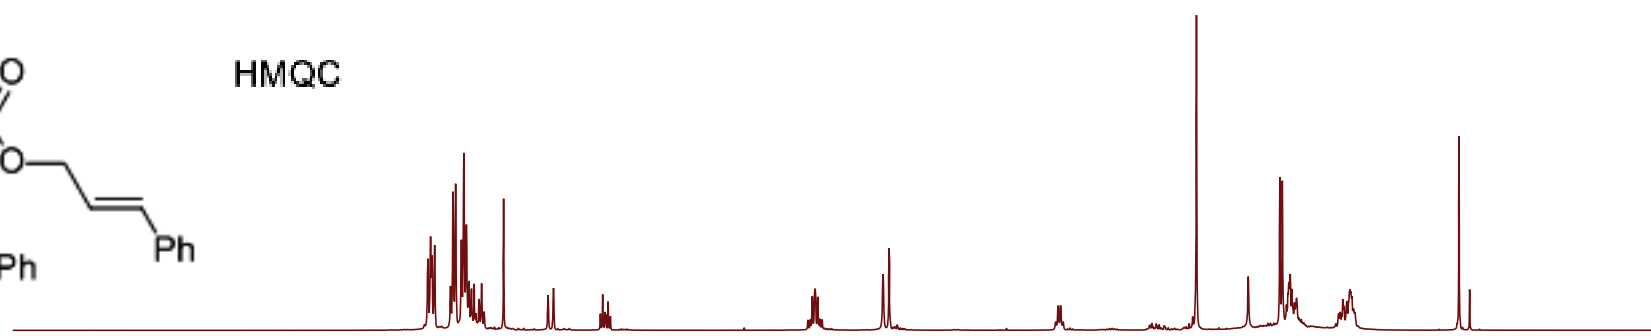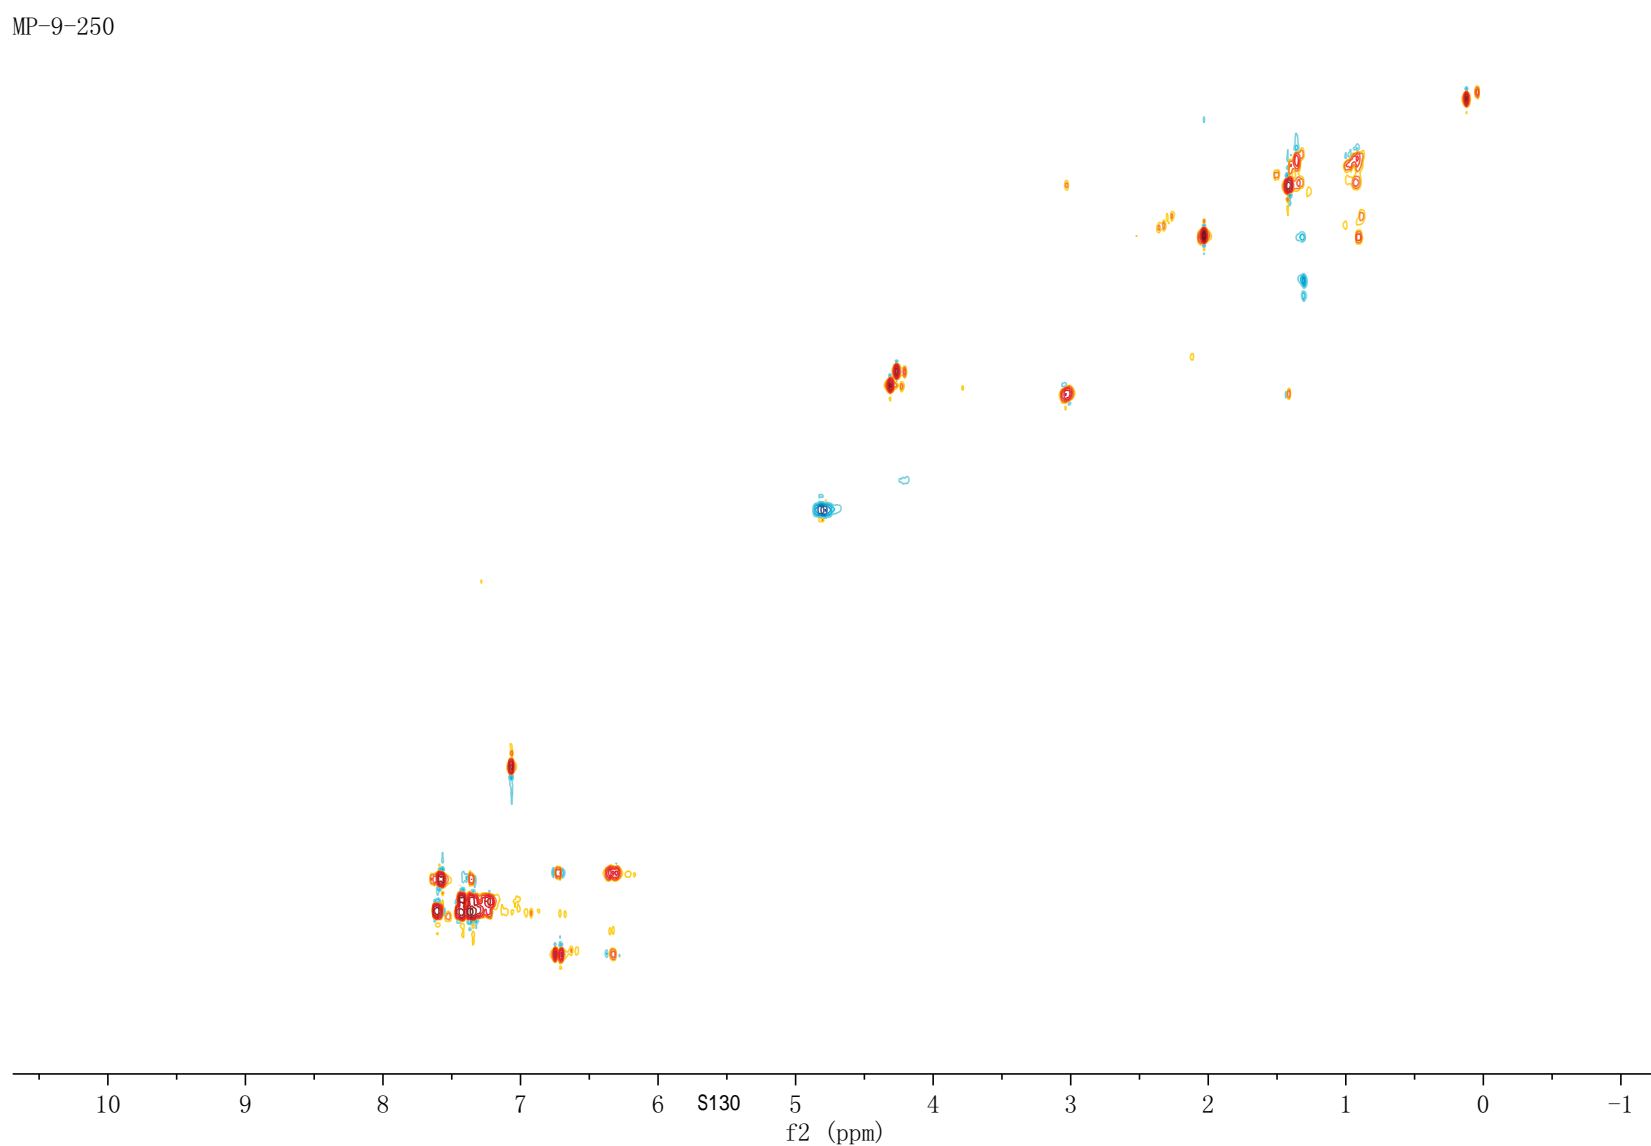

MP-9-250

f1 (ppm)

f2 (ppm)

S130

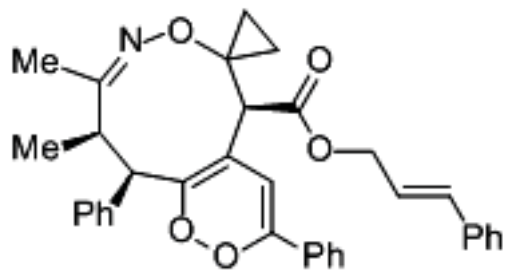

10

NOESY

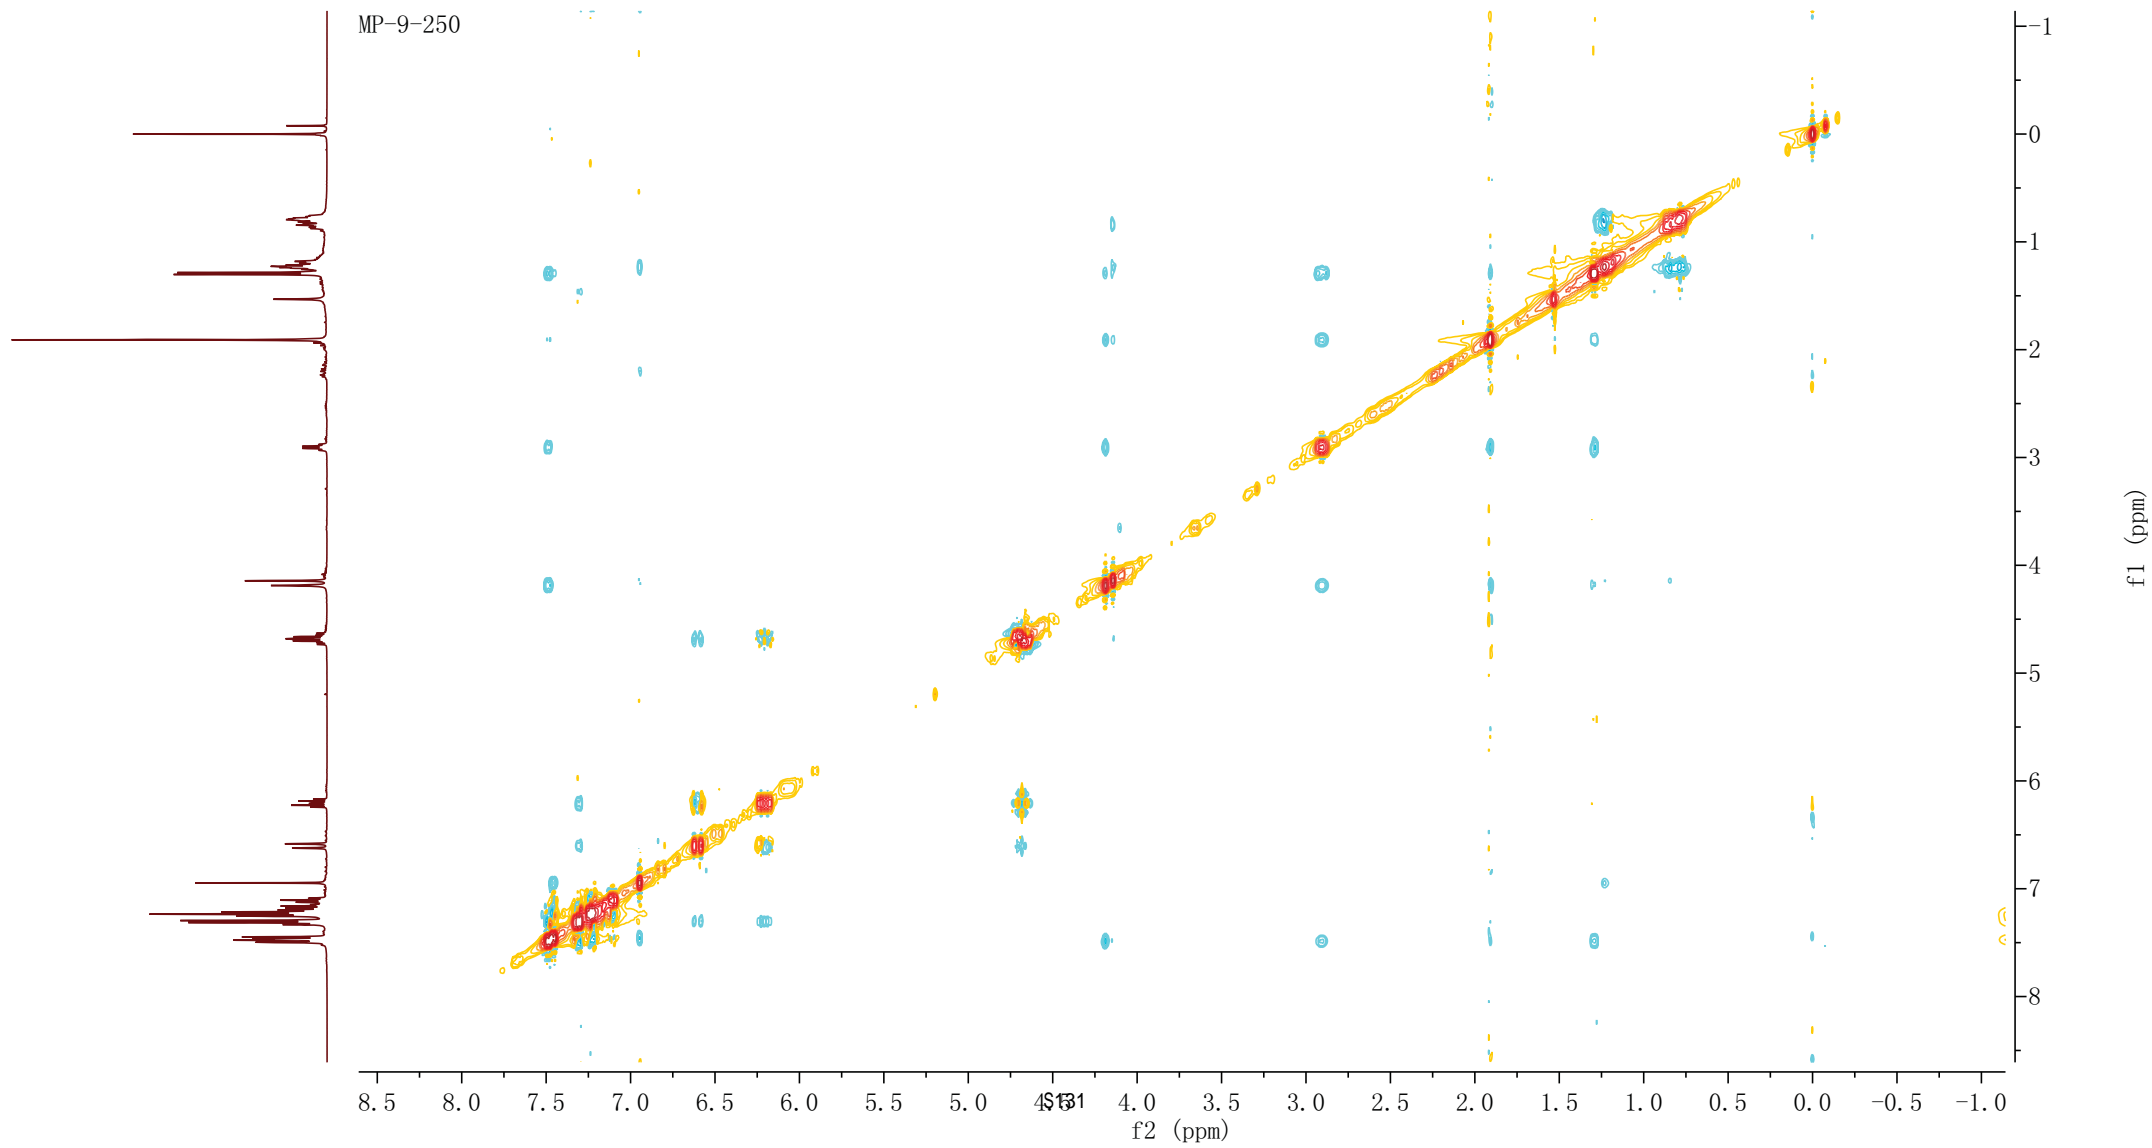

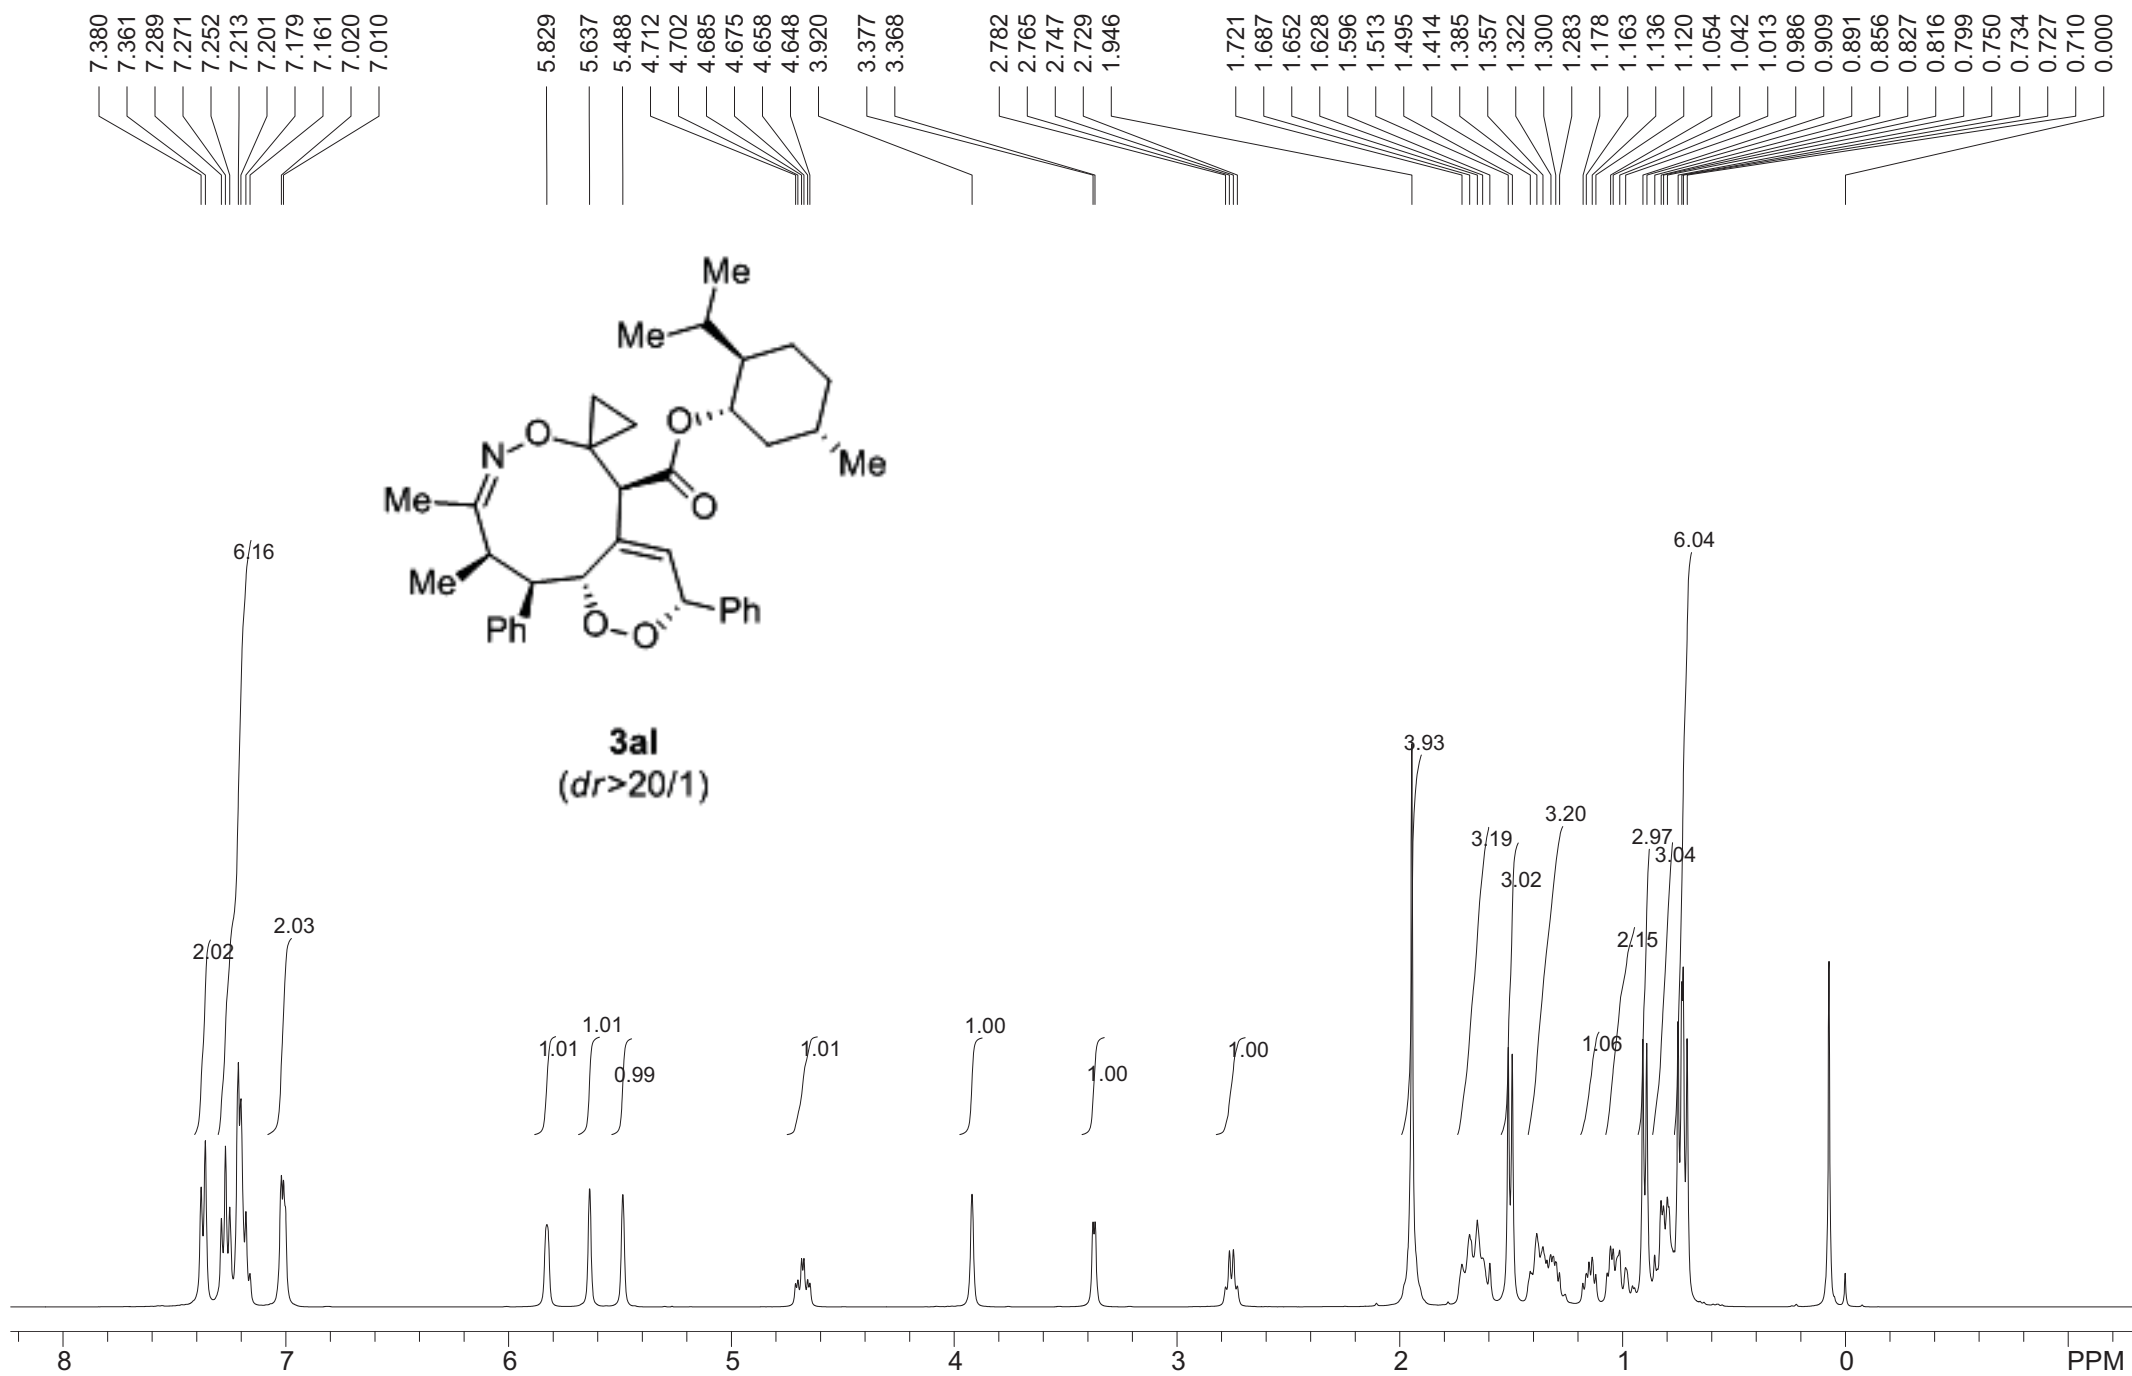

—172.26  
—169.38  
  
—143.02  
—136.40  
—135.66  
—129.37  
—128.59  
—128.25  
—127.89  
—127.85  
—126.45  
—125.07

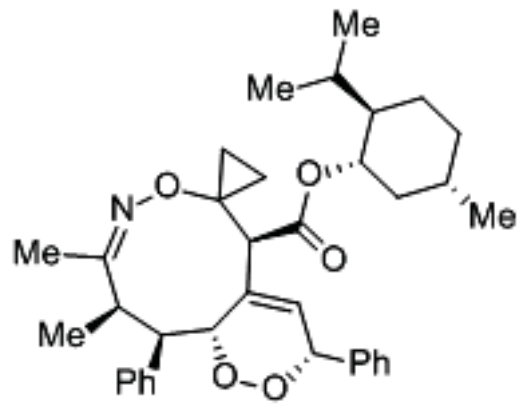

**3aI**  
(*dr* > 20/1)

—79.80  
—77.75  
—77.21  
—77.00  
—76.79  
—74.93  
  
—62.69  
  
—50.72  
—49.91  
—46.74  
—46.01  
—40.67  
  
—34.04  
—31.25  
—25.76  
—22.90  
—21.86  
—21.79  
—20.89  
—15.76  
—12.50  
—10.99  
—9.51

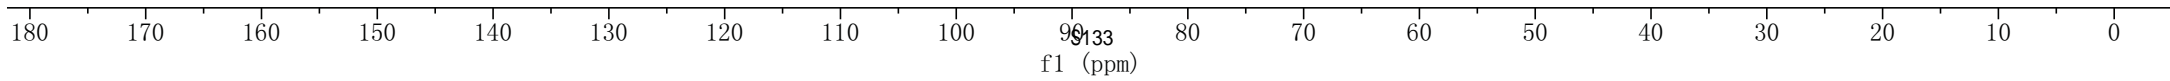

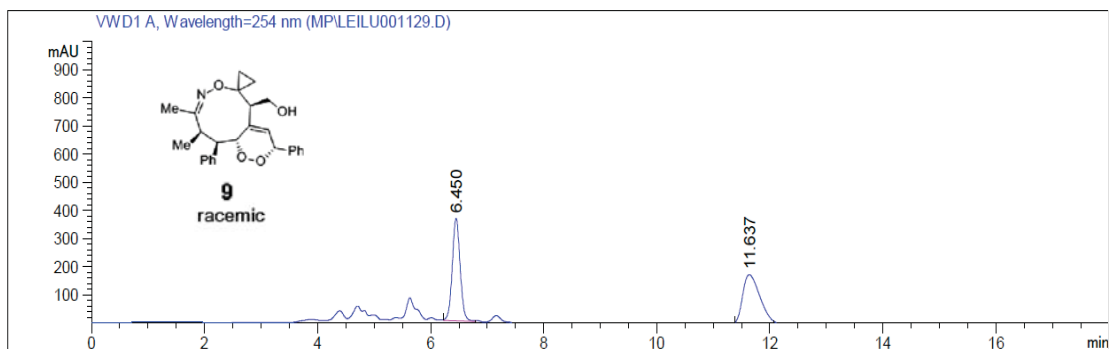

| Peak | ReTime [min] | Type | Width [min] | Area [MAU*s] | Height [MAU] | Area %  |
|------|--------------|------|-------------|--------------|--------------|---------|
| 1    | 6.450        | MM   | 0.1608      | 3523.64258   | 365.31042    | 50.0481 |
| 2    | 11.637       | MM   | 0.3410      | 3516.87134   | 171.90103    | 49.9519 |

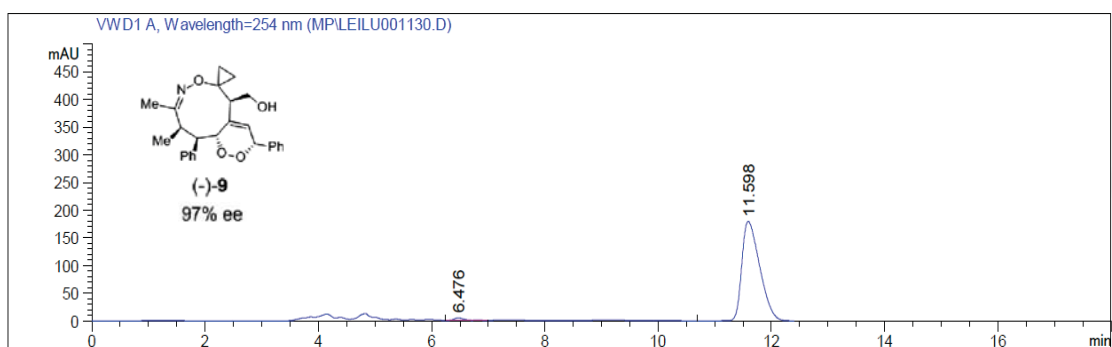

| Peak | ReTime [min] | Type | Width [min] | Area [MAU*s] | Height [MAU] | Area %  |
|------|--------------|------|-------------|--------------|--------------|---------|
| 1    | 6.476        | BV   | 0.2005      | 61.45310     | 4.65779      | 1.5311  |
| 2    | 11.598       | BB   | 0.3381      | 3952.20190   | 179.73181    | 98.4689 |

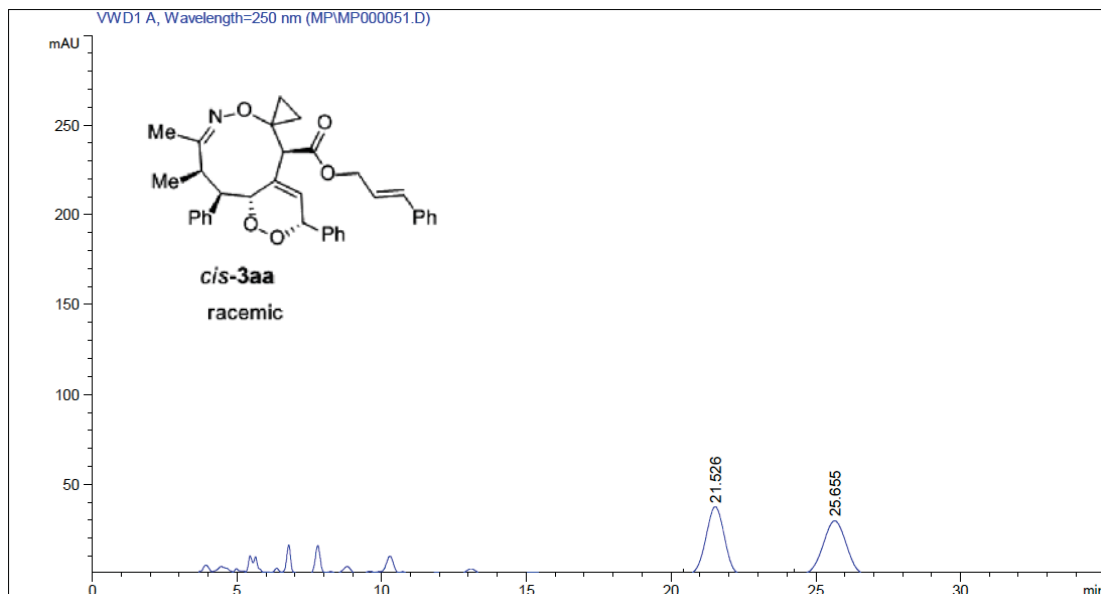

| Peak | ReTime [min] | Type | Width [min] | Area [MAU*s] | Height [MAU] | Area %  |
|------|--------------|------|-------------|--------------|--------------|---------|
| 1    | 21.526       | BB   | 0.6926      | 1646.56970   | 37.62419     | 50.0341 |
| 2    | 25.655       | BB   | 0.8721      | 1644.32373   | 29.74473     | 49.9659 |

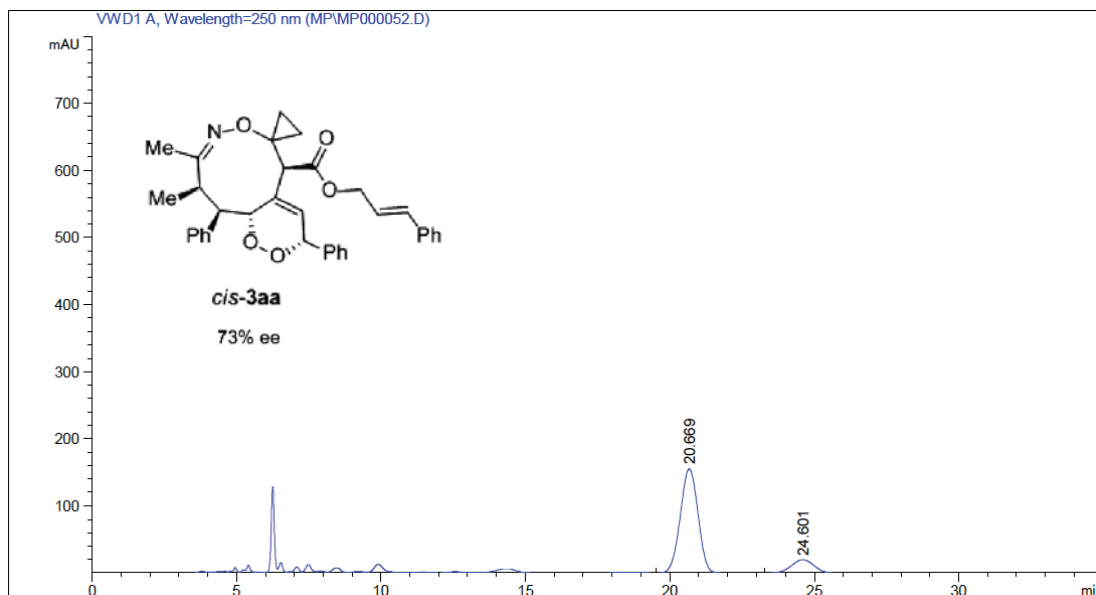

| Peak | ReTime [min] | Type | Width [min] | Area [MAU*s] | Height [MAU] | Area %  |
|------|--------------|------|-------------|--------------|--------------|---------|
| 1    | 20.669       | BB   | 0.6651      | 6590.16113   | 154.96255    | 86.2521 |
| 2    | 24.601       | BB   | 0.8345      | 1050.41870   | 19.65747     | 13.7479 |
